# Supplementary material for: Tautomerism and stereodynamics in Schiff bases from gossypol and hemigossypol withN-aminoheterocycles
Source: Royal Society of Chemistry journal article supplement (doi:10.1039/c9ob01011d), 2019-01-01
Supplement: c9ob01011d1.pdf [file c9ob01011d1.pdf]

## Electronic Supplementary Information (ESI)

### Tautomerism and stereodynamics in Schiff bases from gossypol and hemigossypol with *N*-aminoheterocycles

*Esther Matamoros,\* Pedro Cintas and Juan C. Palacios\**

Departamento de Química Orgánica e Inorgánica, Facultad de Ciencias, and IACYS-Unidad de Química Verde y Desarrollo Sostenible, Universidad de Extremadura, 06006 Badajoz, Spain.

E-mail: esthermc@unex.es; palacios@unex.es

#### ORCID

Esther Matamoros: 0000-0003-4460-2065

Pedro Cintas: 0000-0002-2608-3604

Juan Carlos Palacios: 0000-0002-5004-4744

#### Summary

| Pages | Supporting Data                                                                                                                     |
|-------|-------------------------------------------------------------------------------------------------------------------------------------|
| S-2   | Experimental Section                                                                                                                |
| S-5   | Mass Spectra (Fig. S1-S3)                                                                                                           |
| S-7   | IR Spectra. (Fig. S4-S6)                                                                                                            |
| S-8   | Raman Spectra. (Fig. S7-S9)                                                                                                         |
| S-9   | IR Spectra in CHCl <sub>3</sub> . (Fig. S10-S11)                                                                                    |
| S-10  | NMR Spectra in DMSO- <i>d</i> <sub>6</sub> (Fig. S12-S21)                                                                           |
| S-15  | NMR Spectra in CDCl <sub>3</sub> (Fig. S22-S25)                                                                                     |
| S-17  | IRC Analyses (Fig. S26-S27)                                                                                                         |
| S-18  | Tables S2 to S19                                                                                                                    |
| S-26  | Cartesian Coordinates and Calculated Energies at the M06-2X/6-311G(d,p) Level in Gas Phase, CHCl <sub>3</sub> and DMSO (SMD Model). |

## Experimental Section

**General.** Gossypol was supplied by the Russian Academy of Sciences (Moscow). Melting points were determined on Gallenkamp and Electrothermal IA 9000 apparatuses and are uncorrected. IR spectra were recorded in the range of 4000-600  $\text{cm}^{-1}$  on an FT-IR THERMO spectrophotometer. Solid samples were recorded on KBr (Merck) pellets. Dispersive Raman spectra were recorded in the range of 4000-400  $\text{cm}^{-1}$  on a Nicolet Almega XR THERMO spectrophotometer equipped with a 780 nm laser (with fluorescence correction). NMR spectra were recorded on Bruker 400 and 500 AC/PC instruments, in different solvent systems. Assignments were facilitated by one- and two-dimensional COSY and HMQC spectra, isotopic exchange after addition of  $\text{D}_2\text{O}$ , and DEPT (distortionless enhancement by polarization transfer) experiments. TMS was used as the internal standard ( $\delta = 0.00$  ppm) and all  $J$  values are given in hertz. Microanalyses were determined on a Leco® CHNS-932 analyser. HR-MS and ESI spectra were performed in a 6520 Accurate-Mass Q-TOF LC/MS from Agilent Technologies in positive mode.

**Calculations.** The computational DFT study has been performed using the M06-2X<sup>1</sup> hybrid density functional in conjunction with the 6-311G(d,p) basis set<sup>2</sup> as implemented in the Gaussian09 package.<sup>3</sup> The M06-2X method was chosen on the basis of previous studies showing its accuracy in estimating conformational energies related to non-covalent interactions.<sup>4</sup> In all cases, frequency calculations were also carried out to confirm the existence of true stationary points on the potential energy surface. All thermal corrections were calculated at the standard values of 1 atm at 298.15 K. Solvent effects were modeled through the method of density-based, self-consistent reaction field (SCRf) theory of bulk electrostatics, namely, the solvation model density (SMD) method<sup>5</sup> as implemented in the Gaussian09 suite of programs. This solvation method accounts for long-range electrostatic polarization (bulk solvent)<sup>6</sup> as well as for short-range effects associated with cavitation, dispersion, and solvent structural effects.<sup>7</sup>

**Natural Bond Orbital (NBO) Approach.** Intramolecular interaction of the stabilization energies were performed by using second order perturbation theory. For each donor NBO( $i$ ) and acceptor NBO( $j$ ), the stabilization energy  $E_2$  associated with electron delocalization between donor and acceptor is estimated as:

$$E_2 = \Delta E_{ij} = -q_i (F_{ij})^2 / (\epsilon_i - \epsilon_j)$$

where  $q_i$  is the donor orbital occupancy,  $\epsilon_i$ ,  $\epsilon_j$  are diagonal elements (orbital energies), and  $F_{ij}$  is the off-diagonal NBO Fock matrix element.<sup>8</sup>

In the natural bond orbital (NBO) approach, a hydrogen bond is viewed as an interaction between an occupied nonbonded natural orbital  $n_A$  of the acceptor atom A and the unoccupied antibonding orbital of the DH bond  $\sigma_{\text{DH}}^*$ .

**Pseudo-aromaticity and Molecular Geometry Index.** Geometrical parameters of the rings and quasi-rings (C-C, C-N, and C-O bond lengths) were used to calculate the aromaticity index HOMA (harmonic oscillator model of aromaticity)<sup>9</sup> as a geometry-based indicator of local aromaticity. According to its definition, HOMA can be expressed by the following equation:

$$HOMA = 1 - \frac{1}{n} \sum_{j=1}^n \alpha_i (R_{\text{opt}i} - R_j)^2$$

$$HOMA = 1 - \frac{1}{n} \sum_{j=1}^n \alpha (R_{\text{opt}} - R_i)^2$$

Where  $R_{\text{opt}}$  and  $\alpha_i$  are obtained as follows:

$$R_{opt} = (R_s + 2R_d)/3$$

$$\alpha = 2/[(R_{opt} - R_s)^2 + (R_{opt} - R_d)^2]$$

where  $n$  represents the total number of bonds taken into the summation and  $\alpha_i$  is a normalization constant fixed to give HOMA = 0 for a model nonaromatic system, e.g., the Kekulé structure of benzene and HOMA = 1 for the system with all bonds equal to the optimal value  $R_{opt,i}$ , assumed to be realized for fully aromatic systems. The higher the HOMA value, the more "aromatic" is the ring in question and hence the more delocalized are the  $\pi$ -electrons of the system. HOMA may be estimated for the set of bonds forming the ring but also for any part of that ring or other sequence of bonds for which delocalization can be considered. In the case of quasi-rings the HOMA was estimated for the sequence of (H)O-C=C-C=N bonds.

Constants  $R_s$  and  $R_d$  denote specific bonds and can be obtained from model compounds; herein ethane and ethene (for C-C and C=C bonds), methylamine and methylenimine (for C-N and C=N bonds), and formic acid (for C-O and C=O bonds). Table S1 shows the  $R_{opt}$  and  $\alpha$  values used for the calculation of the HOMA index.

**Table S1.**  $R_{opt}$  and  $\alpha$  parameters used for the calculation of HOMA indices.

| Parameter | Gas phase |       |        | CHCl <sub>3</sub> |       |        | DMSO  |       |        |
|-----------|-----------|-------|--------|-------------------|-------|--------|-------|-------|--------|
|           | -C        | -N    | -O     | -C                | -N    | -O     | -C    | -N    | -O     |
| $R_{opt}$ | 1.392     | 1.329 | 1.241  | 1.392             | 1.331 | 1.242  | 1.392 | 1.332 | 1.243  |
| $\alpha$  | 87.55     | 89.68 | 168.68 | 89.55             | 89.48 | 194.84 | 90.30 | 89.35 | 194.95 |

**General Synthetic Procedures.** To a solution of gossypol (0.10 g, 0.193 mmol) in diethyl ether/isopropanol 5:3 (2.5 mL:1.5 ml) was added the corresponding amino derivative (0.386 mmol). The reaction mixture was warmed at 50 °C for 5 min and then left at room temperature. The resulting solid was collected by filtration, washed with diethyl ether and recrystallized from ethanol or methanol.

**5,5'-Diisopropyl-1,1',6,6',7,7'-hexahydroxyl-3,3'-dimethyl-8,8'-di(*N*-piperidylazomethino)-2,2'-binaphthalene (13).** 88 %; mp 225-227 °C (lit.<sup>10</sup> mp. 230-232 °C); <sup>1</sup>H NMR (400 MHz, DMSO-*d*<sub>6</sub>)  $\delta$  14.52 (s, 2H, 2 x OH), 9.65 (s, 2H, 2 x CH=N), 8.55 (s, 2H, 2 x OH), 7.92 (s, 2H, 2 x OH), 7.56 (s, 2H, 2 x H-arom), 3.86 (m, 2H, 2 x H-<sup>i</sup>Pr), 3.02 (t,  $J$  = 5.2 Hz, 8H, 4 x CH<sub>2</sub>), 1.95 (s, 6H, 2 x CH<sub>3</sub>-arom), 1.67 (m, 8H, 4 x CH<sub>2</sub>), 1.46 (t,  $J$  = 6.4 Hz, 16H, 2 x CH<sub>2</sub>, 4 x CH<sub>3</sub>-<sup>i</sup>Pr); <sup>13</sup>C NMR (100 MHz, DMSO-*d*<sub>6</sub>)  $\delta$  151.3 (C-OH), 151.1 (C-arom), 147.5 (C=N), 144.5, 132.5, 129.0, 126.3, 118.8, 116.3, 108.2 (C-arom), 53.3 (2C, CH<sub>2</sub>), 27.0 (CH-<sup>i</sup>Pr), 24.9 (2C, CH<sub>2</sub>), 23.8 (ArCH<sub>3</sub>), 21.1, 21.0 (CH<sub>3</sub>-<sup>i</sup>Pr); IR (KBr)  $\bar{\nu}_{max}/cm^{-1}$  3484, 3395 (OH), 2937, 1607 (C=N), 1428, 1332, 1302, 1243, 1165, 858; IR (CHCl<sub>3</sub>)  $\bar{\nu}_{max}/cm^{-1}$  3685, 3628, 3497, 3338 (OH), 3026, 3013, 2946, 2864, 2819, 2398, 1607 (C=N), 1524, 1499, 1429, 1328, 1227, 1205; Raman  $\bar{\nu}_{max}/cm^{-1}$  2933, 1619, 1545, 1433, 1329, 1258, 1160, 1085, 858, 372; LC-MS-TOF in HPLC-acetonitrile solution,  $m/z$  (%) calculated for C<sub>40</sub>H<sub>50</sub>N<sub>4</sub>O<sub>6</sub>: 683.3764 (100); found: 683.3770 (100).

**2,2'-bis(1,6-Dihydroxy-5-isopropyl-3-methyl-8-[(2,6-dimethyl-*N*-piperidinamino)methylidene]naphthalen-7-one) (17).** 63%; mp 156-159 °C; <sup>1</sup>H NMR (500 MHz, DMSO-*d*<sub>6</sub>)  $\delta$  13.59 (d,  $J$  = 9.0 Hz, 2H, 2 x NH), 9.83 (d,  $J$  = 9.0 Hz, 2H, 2 x CHN), 8.43 (s, 2H, 2 x OH), 7.94 (s, 2H, 2 x OH), 7.45 (s, 2H, 2 x H-arom), 3.73 (m,  $J$  = 7.0 Hz, 2H, 2 x H-<sup>i</sup>Pr), 2.78 (sa, 4H, 4 x CH), 1.93 (s, 6H, 2 x CH<sub>3</sub>-arom), 1.72-1.63 (m, 6H, 3 x CH<sub>2</sub>), 1.44 (t,  $J$  = 7.0 Hz, 12H, 4 x CH<sub>3</sub>-<sup>i</sup>Pr), 1.40-1.24 (m, 6H, 3 x CH<sub>2</sub>), 0.97 (t,  $J$  = 6.5 Hz, 12H, 4 x CH<sub>3</sub>); <sup>13</sup>C NMR (100 MHz, DMSO-*d*<sub>6</sub>)  $\delta$  170.3 (C=O), 163.1 (C=NH), 149.8, 145.9, 131.4, 127.3, 127.1, 119.8, 166.4, 115.6, 101.5 (C-arom), 60.0, 59.9 (CH), 32.4, 32.4 (CH<sub>2</sub>), 26.4 (CH-<sup>i</sup>Pr), 23.1 (CH<sub>2</sub>), 20.4, 20.4, 20.2 (CH<sub>3</sub>); IR (KBr)  $\bar{\nu}_{max}/cm^{-1}$  3493, 3283 (OH), 3109, 2965, 2932, 2871, 1604 (C=N), 1534, 1490, 1333, 1307, 1242, 1174, 1097, 763; IR (CHCl<sub>3</sub>)  $\bar{\nu}_{max}/cm^{-1}$  3684, 3621, 3497, 3324 (OH), 3109, 3025, 3014, 2973, 2938, 2874, 2400, 1607 (C=N), 1517, 1493, 1452, 1336, 1318, 1228, 1205; Raman  $\bar{\nu}_{max}/cm^{-1}$  1617, 1524, 1426, 1332, 422, 378; HPLC-acetonitrile solution,  $m/z$  (%) calculated for C<sub>44</sub>H<sub>58</sub>N<sub>4</sub>O<sub>6</sub>: 739.4390 (100); found: 739.4406 (100). Elemental analysis

calcd (%) for  $C_{44}H_{58}N_4O_6$ : C 71.52; H 7.91; N 7.58; found: C 71.72; H 7.71; N 7.40. LC-MS-TOF in HPLC-acetonitrile solution,  $m/z$  (%) calculated for  $C_{44}H_{58}N_4O_6$ : 739.4390 (100); found: 739.4406 (100).

**2,2'-bis{1,6-Dihydroxy-5-isopropyl-3-methyl-8-[(2-hydroxymethyl-1,3-dihydroxy-2-propylamino)methylidene]naphthalen-7-one} (18)**. 23%; mp 288-290 °C (described<sup>11</sup> m.p. 295-297 °C); <sup>1</sup>H NMR (400 MHz, DMSO-*d*<sub>6</sub>) δ 13.38 (d, *J* = 14.0 Hz, 2H, 2 x NH), 10.02 (d, *J* = 14.0 Hz, 2H, 2 x CHN), 8.43 (s, 2H, 2 x OH), 7.40 (s, 2H, 2 x H-arom), 4.99 (s, 6H, 6 x OH), 3.69 (m, *J* = 7.0 Hz, 2H, 2 x H-<sup>i</sup>Pr), 3.60 (s, 12H, 6 x CH<sub>2</sub>), 1.95 (s, 6H, 2 x CH<sub>3</sub>-arom), 1.43 (d, *J* = 7.0 Hz, 6H, 2 x CH<sub>3</sub>-<sup>i</sup>Pr), 1.42 (d, *J* = 6.5 Hz, 6H, 2 x CH<sub>3</sub>-<sup>i</sup>Pr); <sup>13</sup>C NMR (125 MHz, DMSO-*d*<sub>6</sub>) δ 171.14 (C=O), 160.54 (CH=N), 146.35, 130.63, 126.66, 125.61, 116.30, 103.25 (C-arom), 63.85, 60.85, 26.38 (CH-<sup>i</sup>Pr), 25.37 (CH<sub>2</sub>), 20.26, 20.11 (CH<sub>3</sub>); IR (KBr)  $\bar{\nu}_{max}/cm^{-1}$  3500-3200 (OH), 2957, 2925, 2868, 1611 (C=N), 1507, 1490, 1360, 1310, 1239, 1171, 1049, 839, 771; Raman  $\bar{\nu}_{max}/cm^{-1}$  1628, 1496, 1427, 1376, 1327, 1138, 532, 380; LC-MS-TOF in HPLC-acetonitrile solution,  $m/z$  (%) calculated for  $C_{38}H_{48}N_2O_{12}$ : 725.3241 (100); found: 725.3257 (100).

- 1 Y. Zhao and D. G. Truhlar, *Theor. Chem. Acc.*, 2008, **120**, 215.
- 2 a) A. D. McLean and G. S. Chandler, *J. Chem. Phys.*, 1980, **72**, 5639. b) K. Raghavachari, J. S. Binkley, R. Seeger and J. A. Pople, *J. Chem. Phys.*, 1980, **72**, 650.
- 3 M. J. Frisch, G. W. Trucks, H. B. Schlegel, G. E. Scuseria, M. A. Robb, J. R. Cheeseman, G. Scalmani, V. Barone, B. Mennucci, G. A. Petersson, H. Nakatsuji, M. Caricato, X. Li, H. P. Hratchian, A. F. Izmaylov, J. Bloino, G. Zheng, J. L. Sonnenberg, Hada, M. Ehara, K. Toyota, R. Fukuda, J. Hasegawa, M. Ishida, T. Nakajima, Y. Honda, O. Kitao, H. Nakai, T. Vreven, J. A. Montgomery Jr, J. E. Peralta, F. Ogliaro, M. Bearpark, J. J. Heyd, E. Brothers, K. N. Kudin, V. N. Staroverov, R. Kobayashi, J. Normand, K. Raghavachari, A. Rendell, J. C. Burant, S. S. Iyengar, J. Tomasi, M. Cossi, N. Rega, J. M. Millam, M. Klene, J. E. Knox, J. B. Cross, V. Bakken, C. Adamo, J. Jaramillo, R. Gomperts, R. E. Stratmann, O. Yazyev, A. J. Austin, R. Cammi, C. Pomelli, J. W. Ochterski, R. L. Martin, K. Morokuma, V. G. Zakrzewski, G. A. Voth, P. Salvador, J. J. Dannenberg, S. Dapprich, A. D. Daniels, Ö. Farkas, J. B. Foresman, J. V. Ortiz, J. Cioslowski and D. J. Fox, Gaussian 09, Revision A.1, Gaussian, Inc., Wallingford CT, 2009.
- 4 Y. Zhao and D. G. Truhlar, *Acc. Chem. Res.*, 2008, **41**, 157.
- 5 a) A. V. Marenich, C. J. Cramer and D. G. Truhlar, *J. Phys. Chem. B*, 2009, **113**, 4538; b) A. V. Marenich, C. J. Cramer and D. G. Truhlar, *J. Phys. Chem. B*, 2009, **113**, 6378; c) R. F. Ribeiro, A. V. Marenich, C. J. Cramer and D. G. Truhlar, *J. Comput.-Aided Mater.*, 2010, **24**, 317; d) M. A. Halim, D. M. Shaw and R. A. Poirier, *J. Mol. Struct.*, 2010, **960**, 63; e) G. Saielli, *J. Phys. Chem. A*, 2010, **114**, 7261.
- 6 J. Tomasi, B. Mennucci and E. Cancès, *J. Mol. Struct.*, 1999, **464**, 211.
- 7 D. A. Liotard, G. D. Hawkins, G. C. Lynch, C. J. Cramer and D. G. Truhlar, *J. Comput. Chem.*, 1995, **16**, 422.
- 8 a) F. Weinhold, Natural Bond Orbital Methods, in *Encyclopedia of Computational Chemistry* (eds : P. v. R. Schleyer, N. L. Allinger, T. Clark, J. Gasteiger, P. A. Kollman, H. F. Schaefer III, P. R. Schreiner, John Wiley and Sons, Chichester, UK, Vol. 3, 1998, p. 1792; b) F. Weinhold, *NBO 5.0 Program Manual*, Theoretical Chemistry Institute, University of Wisconsin, Madison, 2001.
- 9 a) T. M. Krygowski and M. K. Cyrański, *Chem. Rev.*, 2001, **101**, 1385; b) J. Kruszewski and T. M. Krygowski, *Tetrahedron Lett.*, 1972, **13**, 3839; c) T. M. Krygowski, *J. Chem. Inf. Comput. Sci.*, 1993, **33**, 70; d) T. M. Krygowski and M. Cyrański, *Tetrahedron*, 1996, **52**, 1713; e) P. V. R. Schleyer, *Chem. Rev.*, 2001, **101**, 1115; f) E. Matito, M. Duran and M. Solà, *J. Chem. Phys.*, 2005, **122**, 014109 (1-8).
- 10 R. E. Royer, L. M. Deck, N. M. Campos, L. A. Hunsaker and D. L. Vander Jagt, *J. Med. Chem.*, 1986, **29**, 1799.
- 11 K. L. Ziyaev, F. G. Kamaev, N. I. Baram, L. Biktimirov and A. I. Ismailov, *Chem. Nat. Compd.*, 1997, **33**, 545.

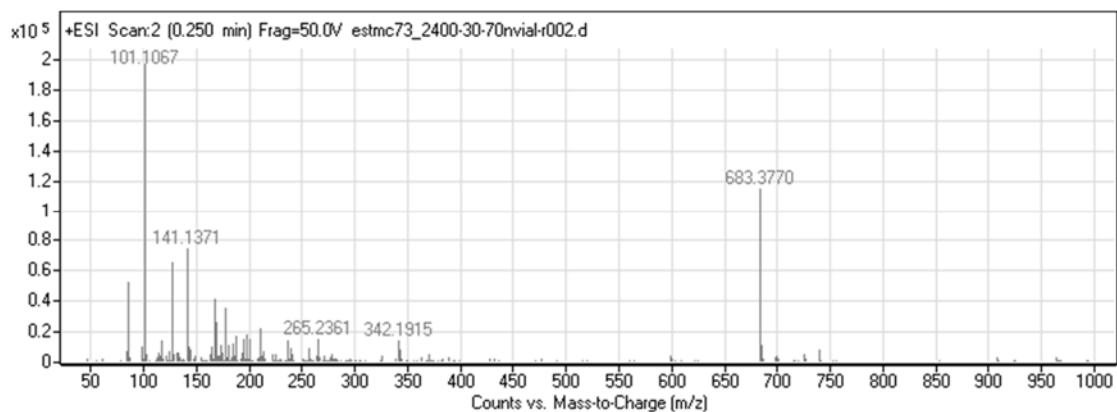

**Figure S1** Mass spectrum of 5,5'-diisopropyl-1,1',6,6',7,7'-hexahydroxyl-3,3'-dimethyl-8,8'-di(*N*-piperidylazomethino)-2,2'-binaphthalene (**13**).

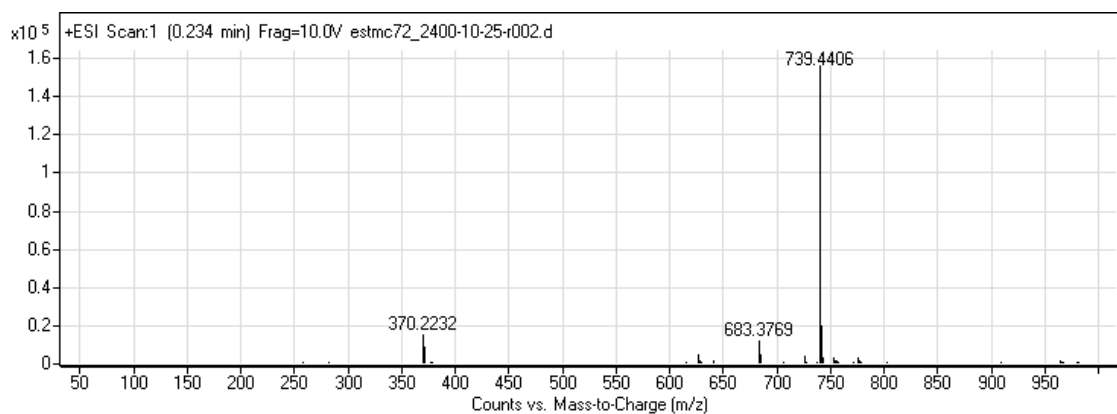

**Figure S2** Mass spectrum of 2,2'-bis{1,6-dihydroxy-5-isopropyl-3-methyl-8-[(2,6-dimethyl-*N*-piperidinamino)methylidene]naphthalen-7-one} (**17**).

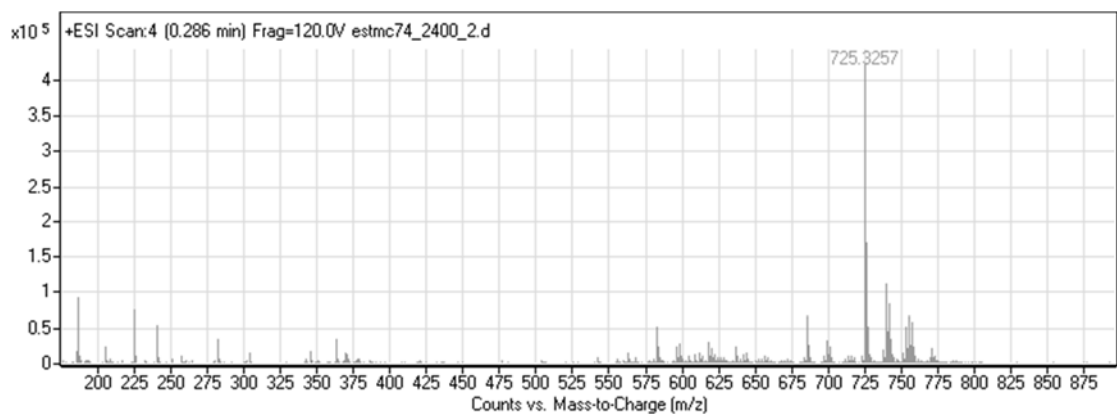

**Figure S3** Mass spectrum of 2,2'-bis{1,6-Dihydroxy-5-isopropyl-3-methyl-8-[(2-hydroxymethyl-1,3-dihydroxy-2-propylamino)methylidene]naphthalen-7-one} (**18**).

### Electrospray ionization mass spectrometry (ESI-MS).

High-resolution mass spectrometry (HRMS) was performed using electrospray ionization (ESI) and time-of-flight (TOF) mass analysis. Neutral compounds can be converted to their ionic form in solution by either protonation or cationisation. The ESI mass spectra of **16** and **17** show signals corresponding to both monoprotonated  $[M + H]^+$  and diprotonated  $[M + 2H]^{2+}$  molecular ions. In the spectrum of **17** the molecular peak is not observed, although a very weak signal at  $m/z$  626 ( $[M-112]^+$ ) emerges, which corresponds to the loss of 2,6-dimethylpiperidyl (**het**,  $C_7H_{14}N$ ,  $m/z = 112$ ) by breaking an N-N bond. In addition, the region of low masses shows the presence of heterocyclic fragments at  $m/z$  157 and 129 (Scheme S1).

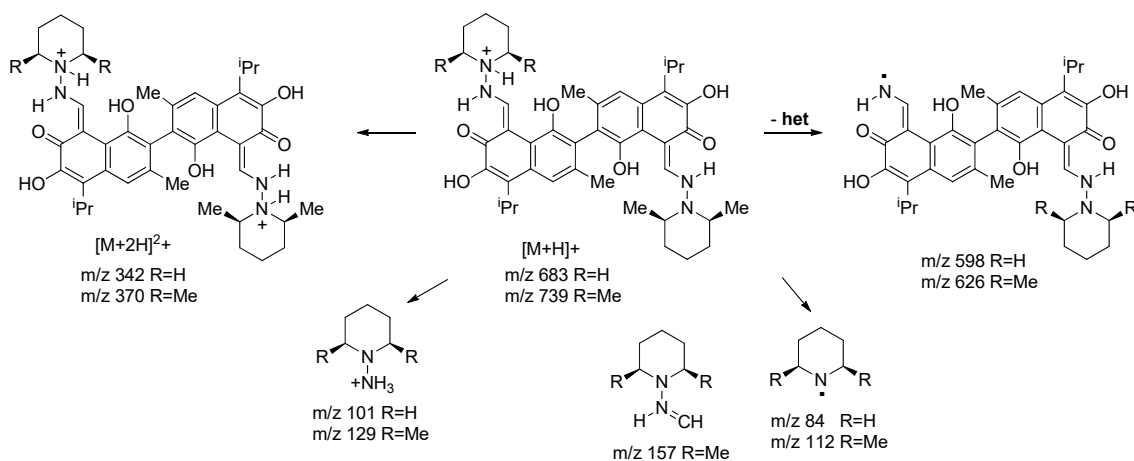

Scheme S1.

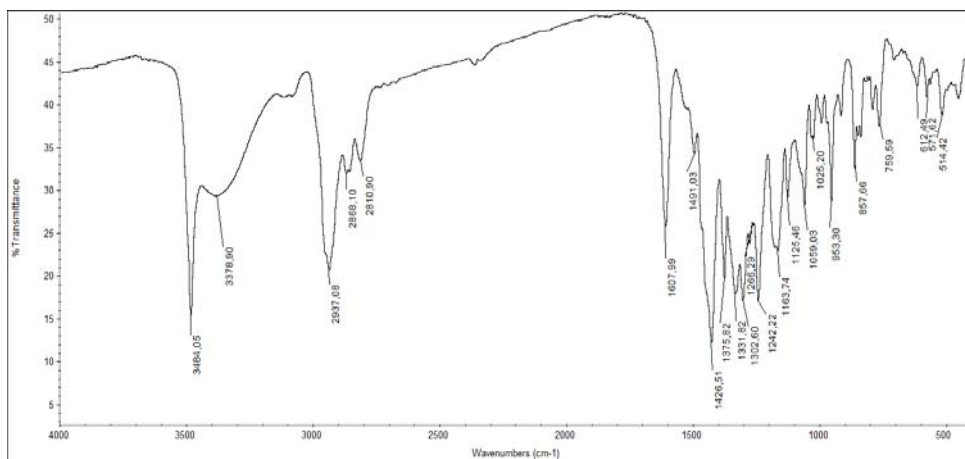

**Figure S4** IR spectrum of 5,5'-diisopropyl-1,1',6,6',7,7'-hexahydroxyl-3,3'-dimethyl-8,8'-di(*N*-piperidylazomethino)-2,2'-binaphthalene (**13**).

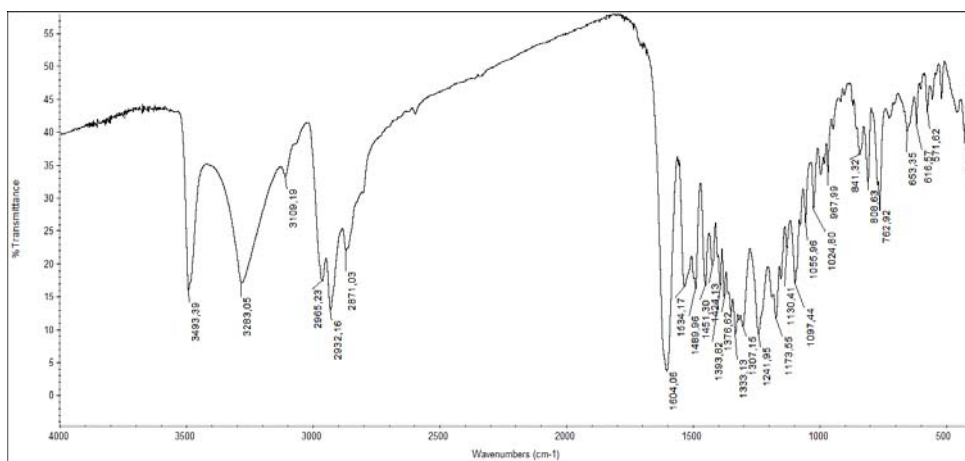

**Figure S5** IR spectrum of 2,2'-bis{1,6-dihydroxy-5-isopropyl-3-methyl-8-[(2,6-dimethyl-*N*-piperidinamino)methylidene]naphthalen-7-one} (**17**).

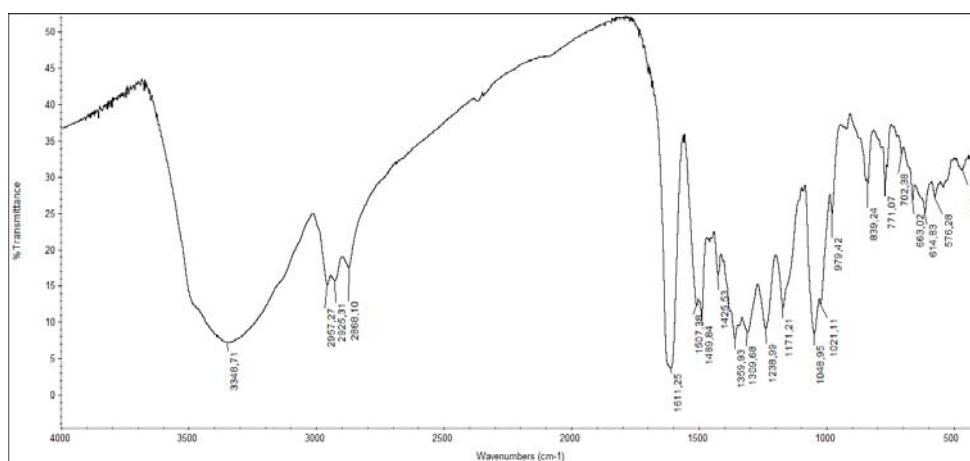

**Figure S6** IR spectrum of 2,2'-bis{1,6-Dihydroxy-5-isopropyl-3-methyl-8-[(2-hydroxymethyl-1,3-dihydroxy-2-propylamino)methylidene]naphthalen-7-one} (**18**).

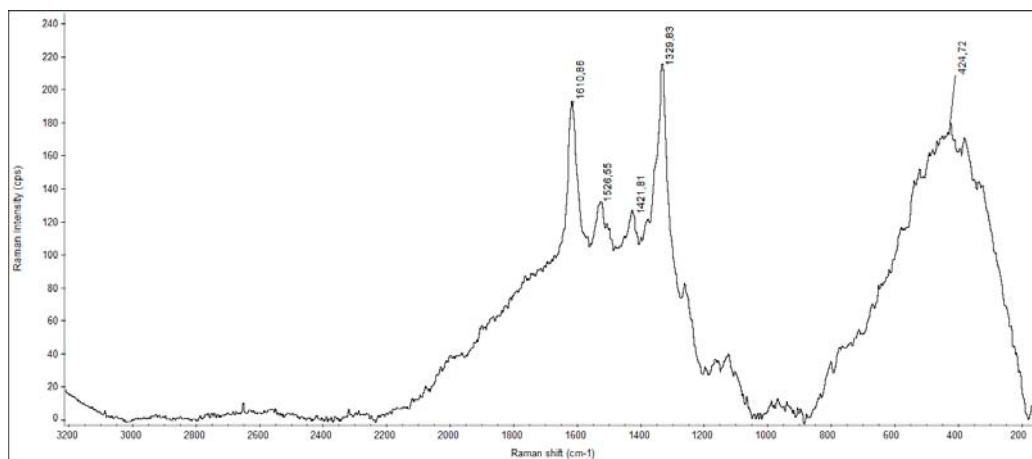

**Figure S7** Raman spectrum of 5,5'-diisopropyl-1,1',6,6',7,7'-hexahydroxyl-3,3'-dimethyl-8,8'-di(*N*-piperidylazomethino)-2,2'-binaphthalene (**13**).

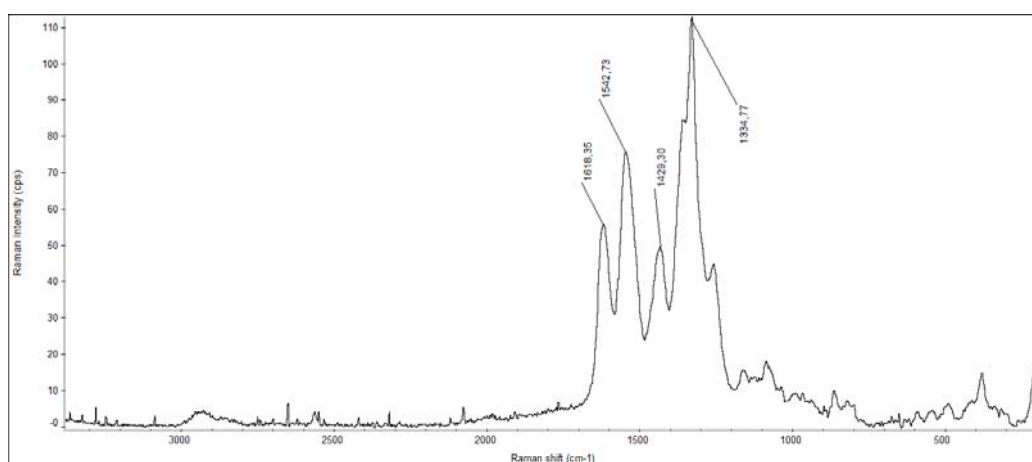

**Figure S8** Raman spectrum of 2,2'-bis{1,6-dihydroxy-5-isopropyl-3-methyl-8-[(2,6-dimethyl-*N*-piperidinamino)methylidene]naphthalen-7-one} (**17**).

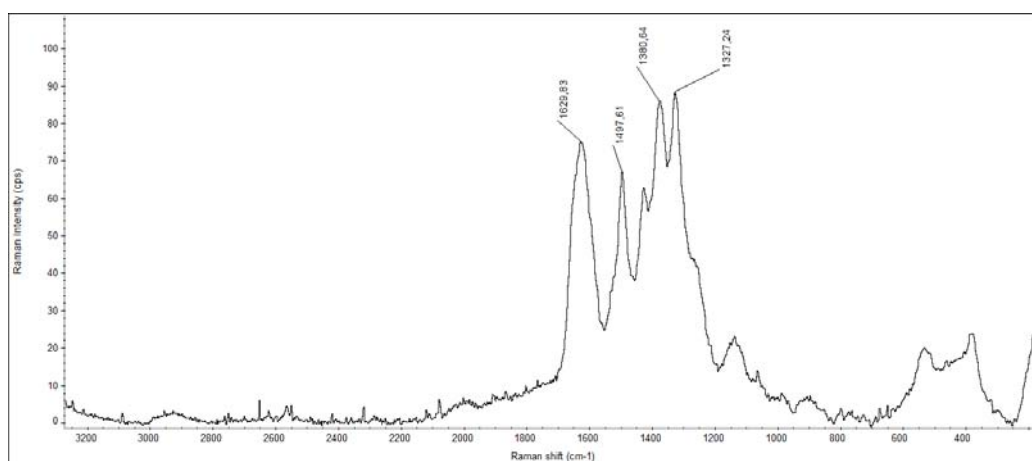

**Figure S9** Raman spectrum of 2,2'-bis{1,6-Dihydroxy-5-isopropyl-3-methyl-8-[(2-hydroxymethyl-1,3-dihydroxy-2-propylamino)methylidene]naphthalen-7-one} (**18**).



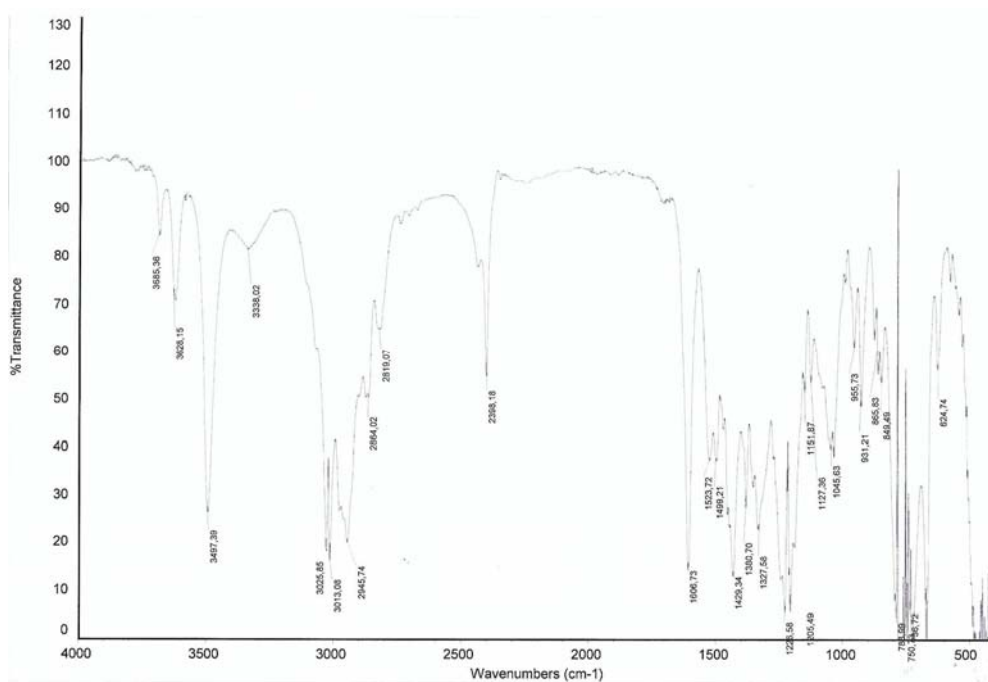

**Figure S10** IR spectrum of 5,5'-diisopropyl-1,1',6,6',7,7'-hexahydroxyl-3,3'-dimethyl-8,8'-di(*N*-piperidylazomethino)-2,2'-binaphthalene (**13**), recorded in  $\text{CHCl}_3$ .

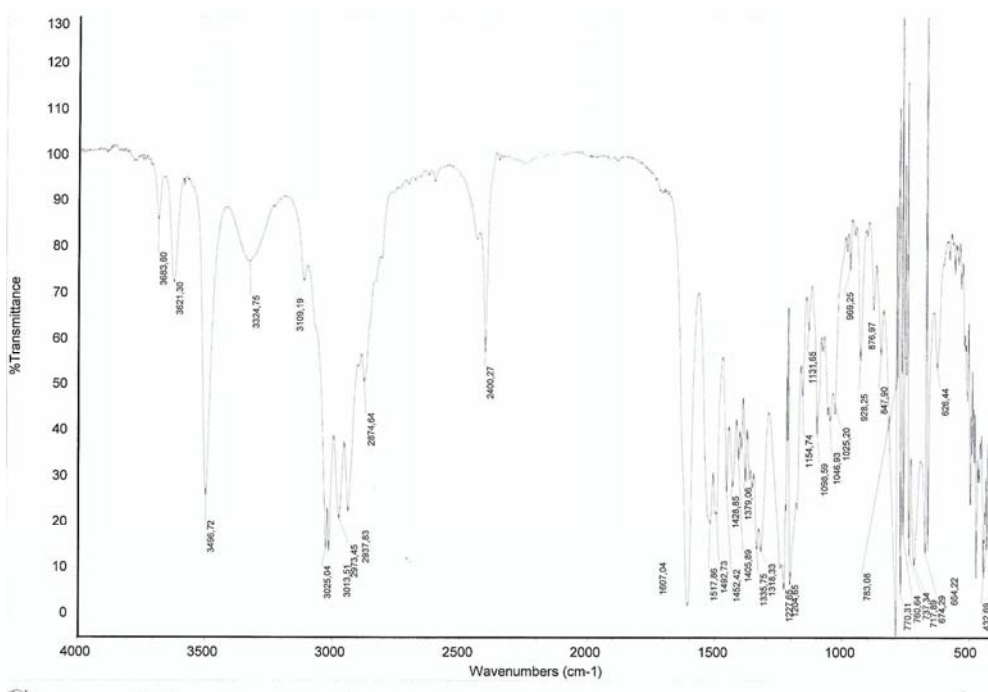

**Figure S11** IR spectrum of 2,2'-bis[1,6-dihydroxy-5-isopropyl-3-methyl-8-[(2,6-dimethyl-*N*-piperidinamino)methylidene]naphthalen-7-one] (**17**), recorded in  $\text{CHCl}_3$ .

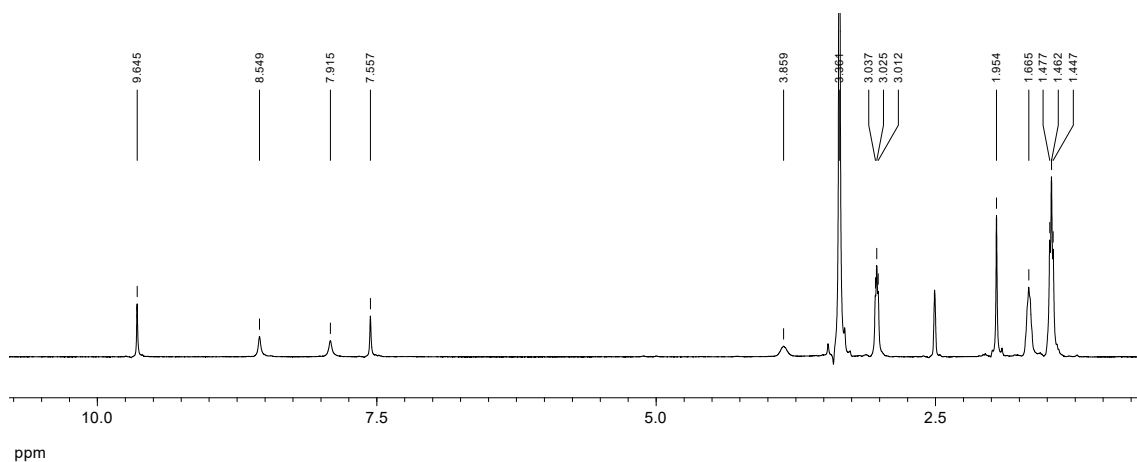

**Figure S12**  $^1\text{H}$  NMR spectrum of 5,5'-diisopropyl-1,1',6,6',7,7'-hexahydroxyl-3,3'-dimethyl-8,8'-di(*N*-piperidylazomethino)-2,2'-binaphthalene (**13**), recorded in  $\text{DMSO-}d_6$ .

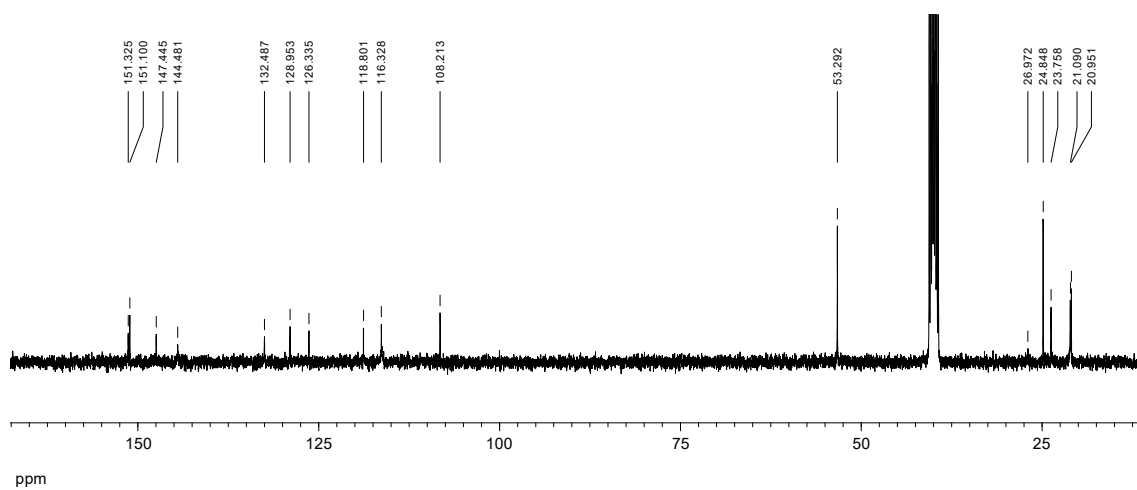

**Figure S13**  $^{13}\text{C}$  NMR spectrum of 5,5'-diisopropyl-1,1',6,6',7,7'-hexahydroxyl-3,3'-dimethyl-8,8'-di(*N*-piperidylazomethino)-2,2'-binaphthalene (**13**), recorded in  $\text{DMSO-}d_6$ .

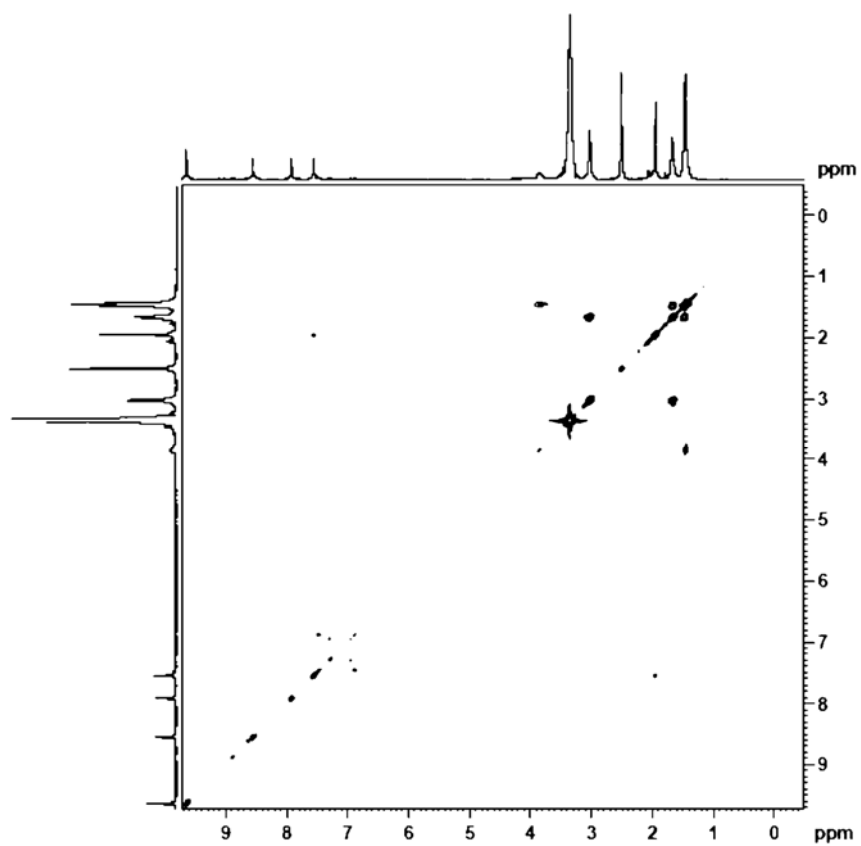

**Figure S14**  $^1\text{H}$ - $^1\text{H}$  COSY spectrum of 5,5'-diisopropyl-1,1',6,6',7,7'-hexahydroxyl-3,3'-dimethyl-8,8'-di(*N*-piperidylazomethino)-2,2'-binaphthalene (**13**), recorded in  $\text{DMSO-}d_6$ .

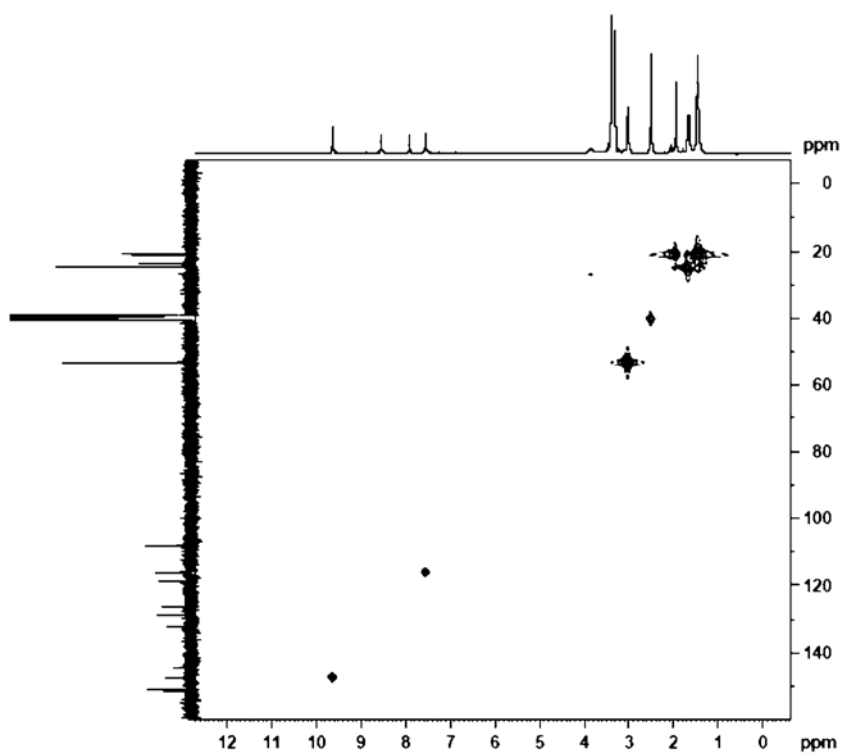

**Figure S15** HMQC spectrum of 5,5'-diisopropyl-1,1',6,6',7,7'-hexahydroxyl-3,3'-dimethyl-8,8'-di(*N*-piperidylazomethino)-2,2'-binaphthalene (**13**), recorded in  $\text{DMSO-}d_6$ .

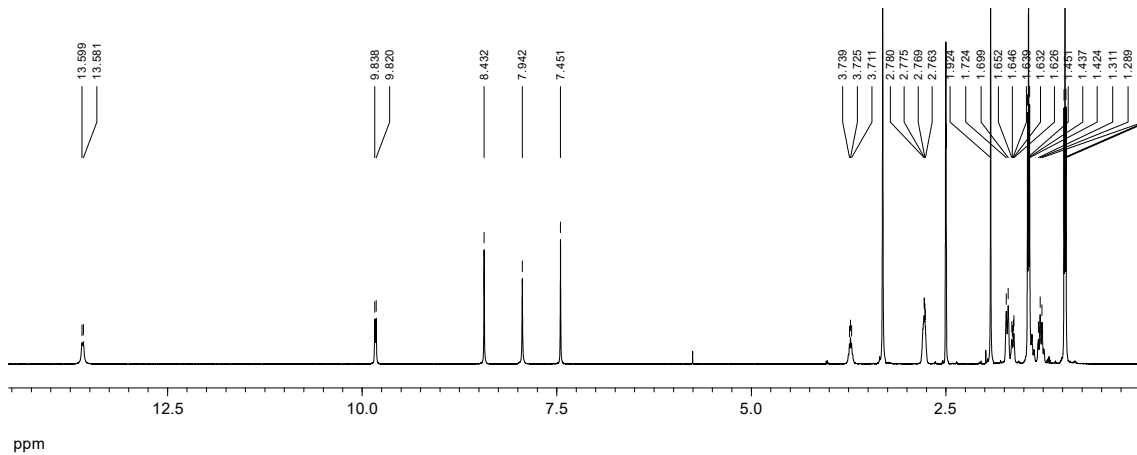

**Figure S16**  $^1\text{H}$  NMR spectrum of 2,2'-bis{1,6-dihydroxy-5-isopropyl-3-methyl-8-[(2,6-dimethyl-*N*-piperidinamino)methylidene]naphthalen-7-one} (**17**), recorded in  $\text{DMSO-}d_6$ .

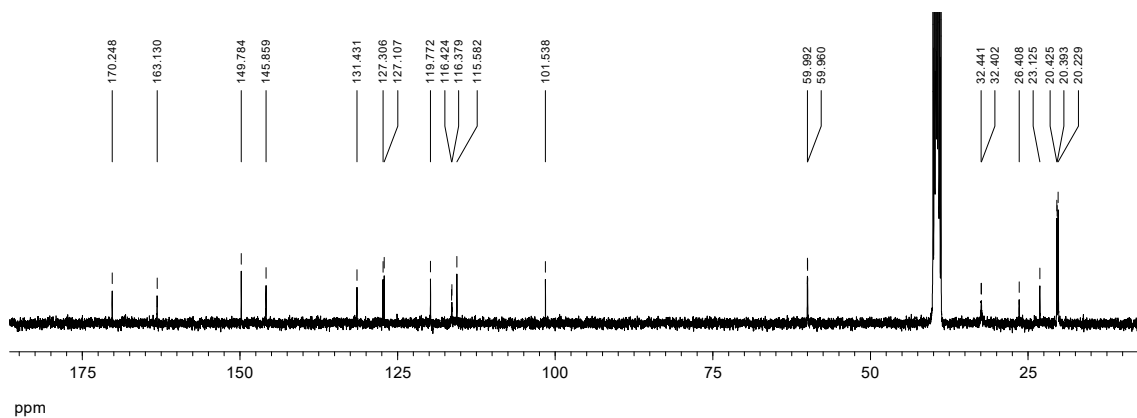

**Figure S17**  $^{13}\text{C}$  NMR spectrum of 2,2'-bis{1,6-dihydroxy-5-isopropyl-3-methyl-8-[(2,6-dimethyl-*N*-piperidinamino)methylidene]naphthalen-7-one} (**17**), recorded in  $\text{DMSO-}d_6$ .

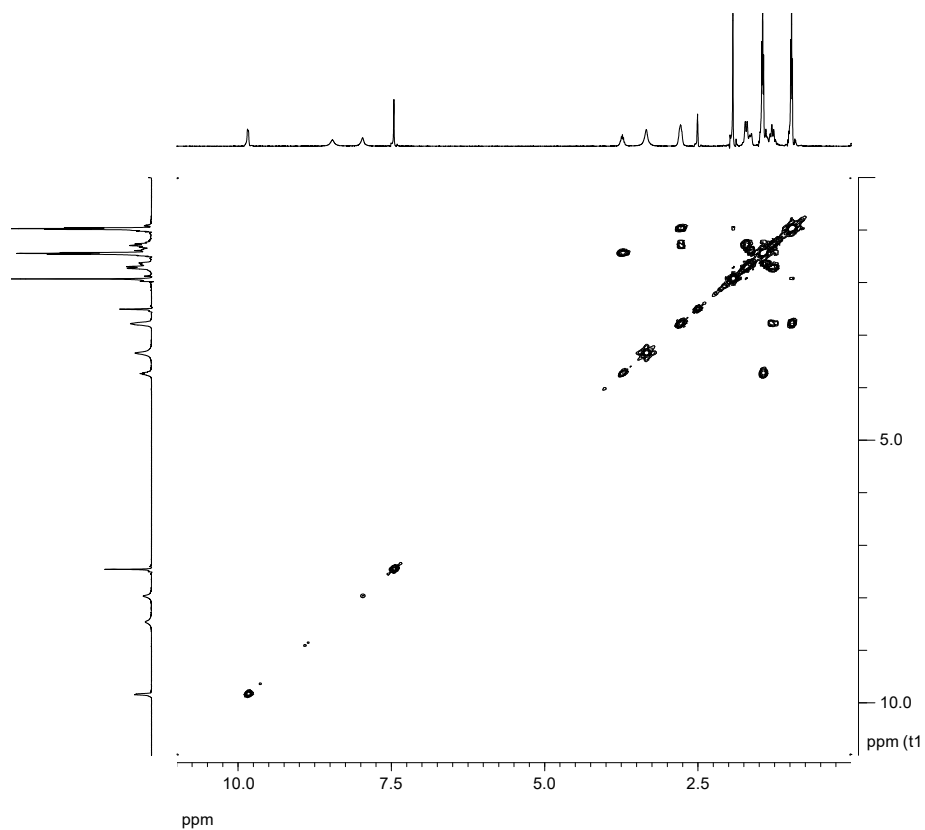

**Figure S18**  $^1\text{H}$ - $^1\text{H}$  COSY spectrum of 2,2'-bis{1,6-dihydroxy-5-isopropyl-3-methyl-8-[(2,6-dimethyl-*N*-piperidinamino) methylene]naphthalen-7-one} (**17**), recorded in  $\text{DMSO-}d_6$ .

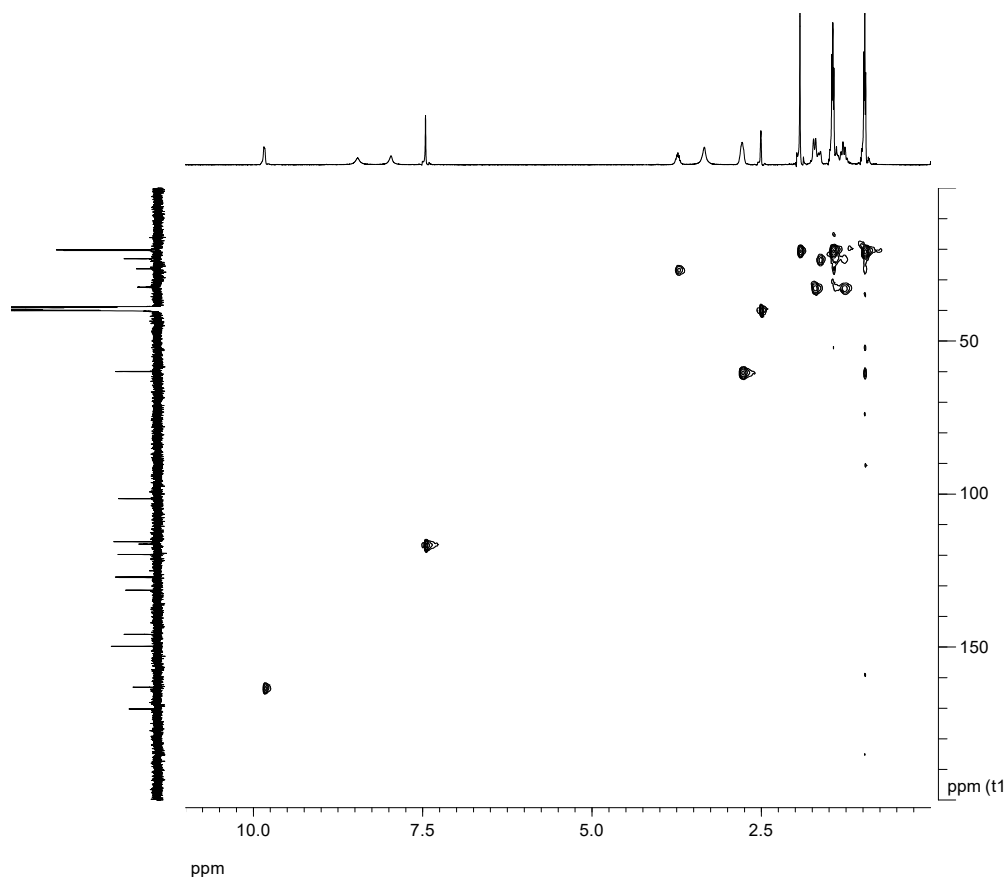

**Figure S19** HMQC spectrum of 2,2'-bis{1,6-dihydroxy-5-isopropyl-3-methyl-8-[(2,6-dimethyl-*N*-piperidinamino) methylene]naphthalen-7-one} (**17**), recorded in  $\text{DMSO-}d_6$ .

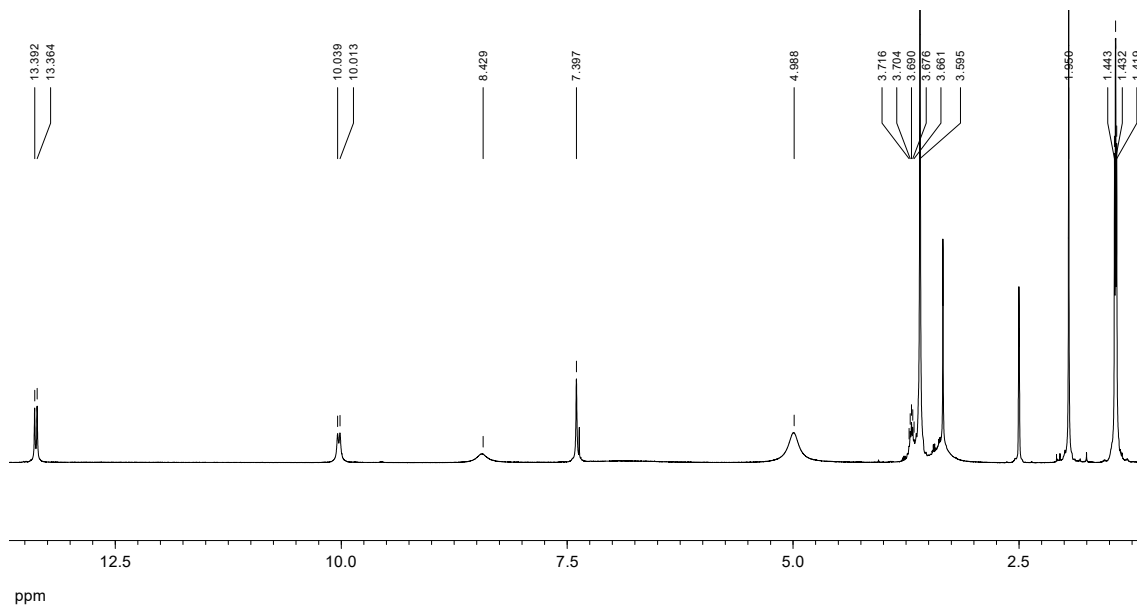

**Figure S20**  $^1\text{H}$  NMR spectrum of 2,2'-bis{1,6-Dihydroxy-5-isopropyl-3-methyl-8-[(2-hydroxymethyl-1,3-dihydroxy-2-propylamino)methylidene]naphthalen-7-one} (**18**), recorded in  $\text{DMSO-}d_6$ .

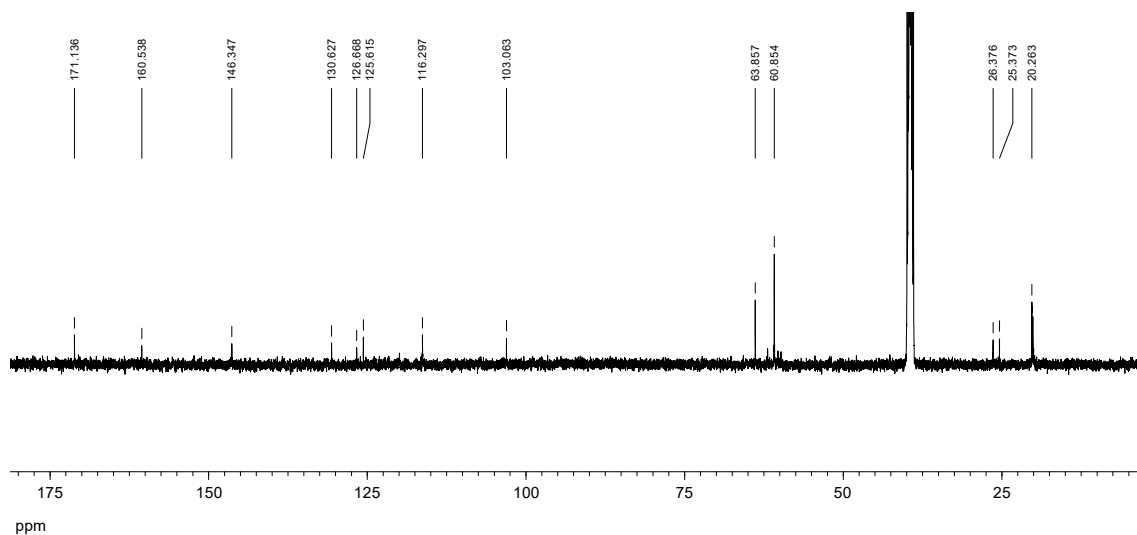

**Figure S21**  $^{13}\text{C}$  NMR spectrum of 2,2'-bis{1,6-dihydroxy-5-isopropyl-3-methyl-8-[(2-hydroxymethyl-1,3-dihydroxy-2-propylamino)methylidene]naphthalen-7-one} (**18**), recorded in  $\text{DMSO-}d_6$ .

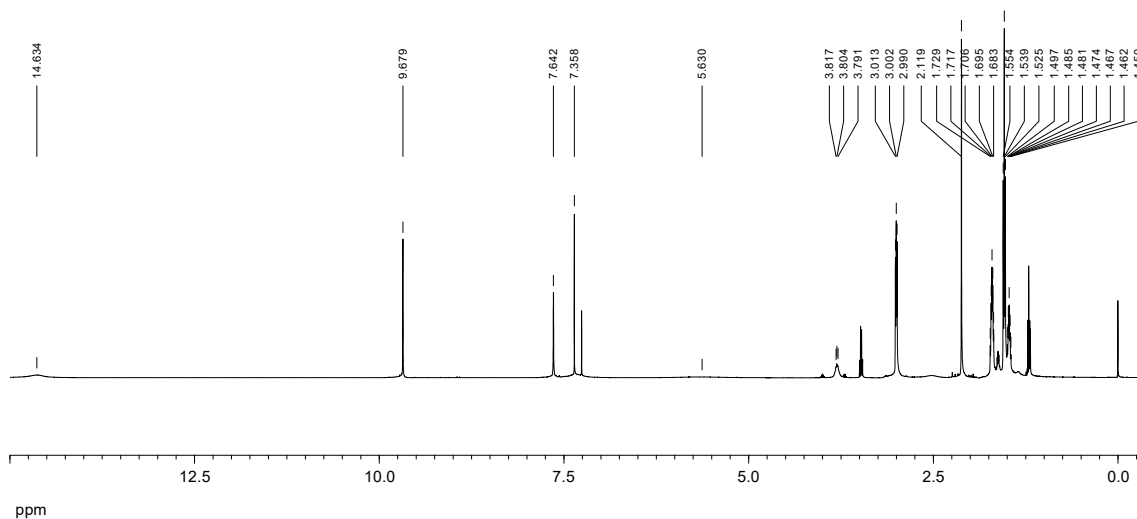

**Figure S22**  $^1\text{H}$  NMR spectrum of 5,5'-diisopropyl-1,1',6,6',7,7'-hexahydroxyl-3,3'-dimethyl-8,8'-di(*N*-piperidylazomethino)-2,2'-binaphthalene (**13**), recorded in  $\text{CDCl}_3$ .

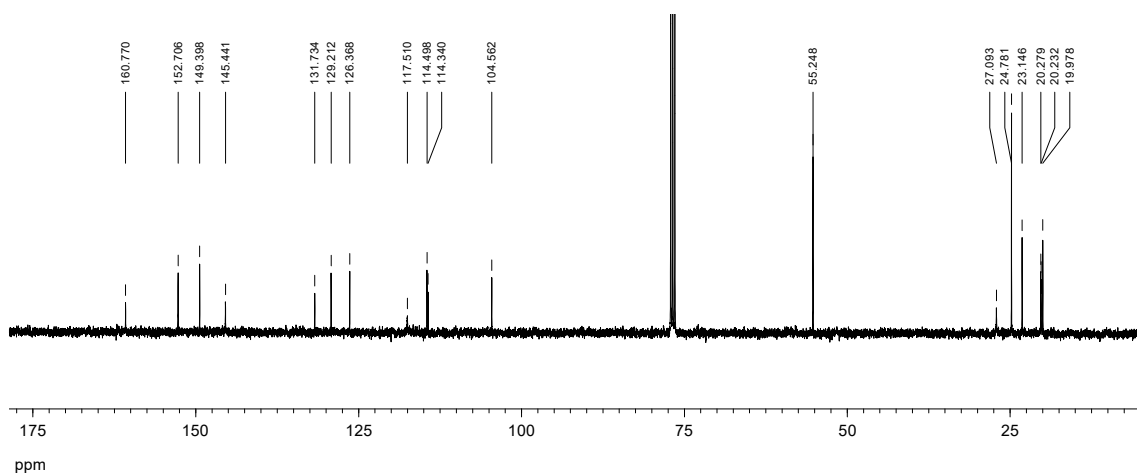

**Figure S23**  $^{13}\text{C}$  NMR spectrum of 5,5'-diisopropyl-1,1',6,6',7,7'-hexahydroxyl-3,3'-dimethyl-8,8'-di(*N*-piperidylazomethino)-2,2'-binaphthalene (**13**), recorded in  $\text{CDCl}_3$ .

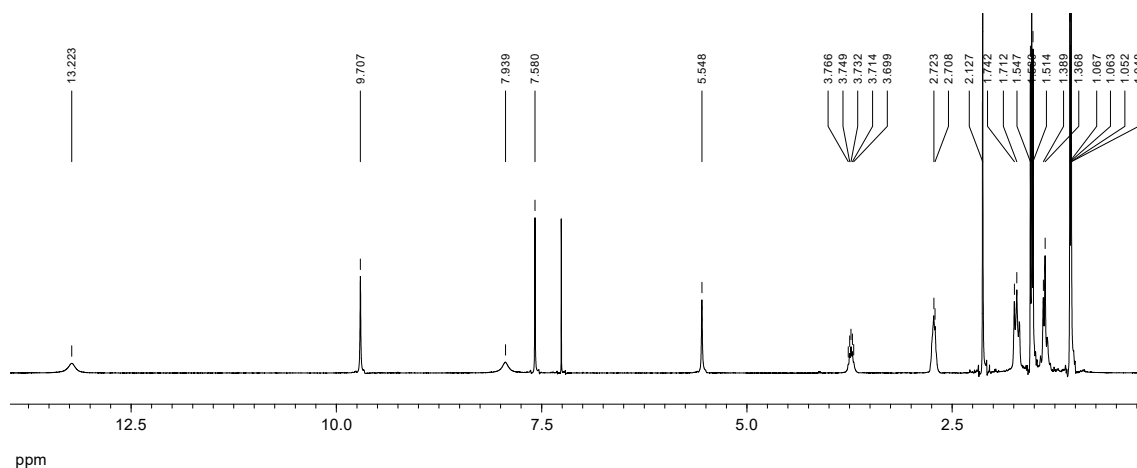

**Figure S24**  $^1\text{H}$  NMR spectrum of 2,2'-bis{1,6-dihydroxy-5-isopropyl-3-methyl-8-[(2,6-dimethyl-*N*-piperidinamino)methylidene]naphthalen-7-one} (**17**), recorded in  $\text{CDCl}_3$ .

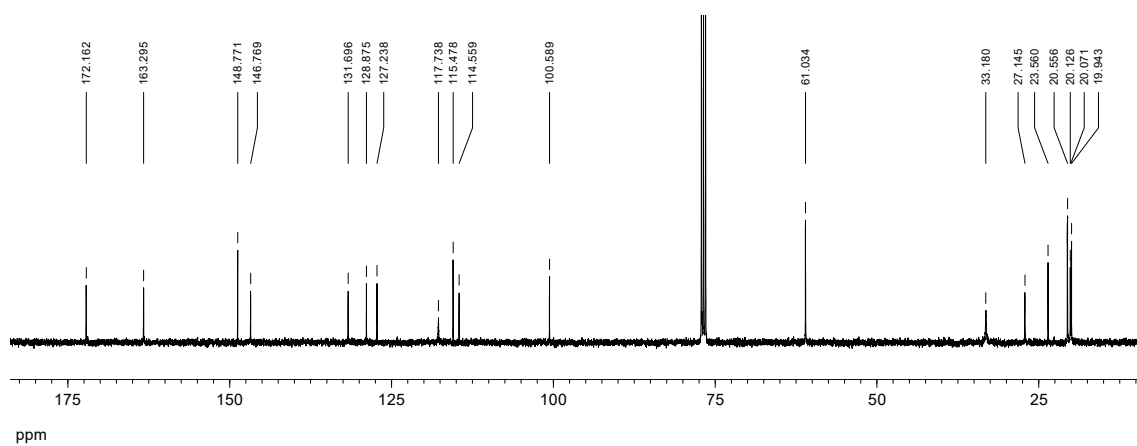

**Figure S25**  $^{13}\text{C}$  NMR spectrum of 2,2'-Bis{1,6-dihydroxy-5-isopropyl-3-methyl-8-[(2,6-dimethyl-*N*-piperidinamino)methylidene]naphthalen-7-one} (**17**), recorded in  $\text{CDCl}_3$ .



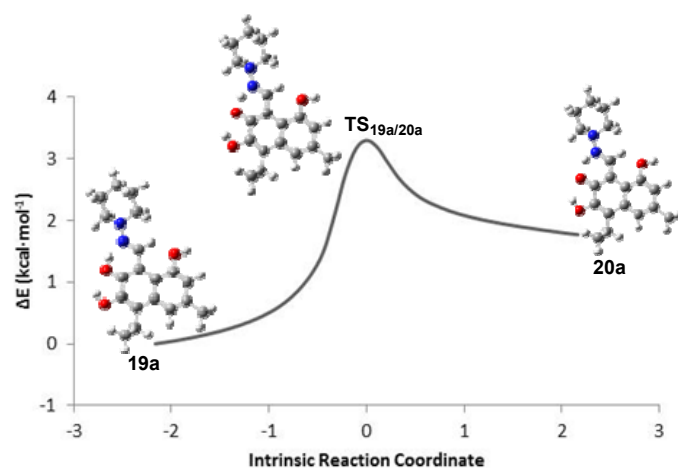

Figure S26 IRC for TS<sub>19a/20a</sub>.

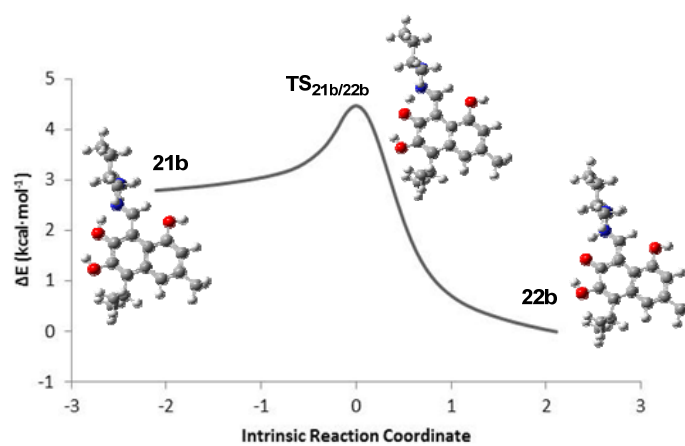

Figure S27 IRC for TS<sub>21b/22b</sub>.

**Table S2** Selected IR and Raman data of compounds **13/16**, **14/17** and **15/18**.<sup>a,b</sup>

|              | $\bar{\nu}_{\text{C1OH}}^{\text{c}}$ | $\bar{\nu}_{\text{C6OH}}^{\text{c}}$ | $\bar{\nu}_{\text{C7OH}}^{\text{c}}$ | $\bar{\nu}_{\text{C7OH}}^{\text{c,e}}$ | $\bar{\nu}_{\text{C=N}}^{\text{c}}$ | $\bar{\nu}_{\text{C=N}}^{\text{d}}$ | $\bar{\nu}_{\text{C-N}}^{\text{d}}$ |
|--------------|--------------------------------------|--------------------------------------|--------------------------------------|----------------------------------------|-------------------------------------|-------------------------------------|-------------------------------------|
| <b>13/16</b> | 3484                                 | 3379                                 | 2937                                 | 2798                                   | 1608w                               | 1610w                               | 1329s                               |
| <b>14/17</b> | 3493                                 | 3283                                 | 3109                                 | 2901                                   | 1604s                               | 1618s                               | 1335s                               |
| <b>15/18</b> | 3500 - 3200                          |                                      |                                      | 2922                                   | 1611s                               | 1629s                               | 1327s                               |

<sup>a</sup>In cm<sup>-1</sup>; b w (=weak), s (=strong); <sup>c</sup>In solid (KBr); <sup>d</sup>Raman; <sup>e</sup>Calculated from equation 1.

**Table S3** Selected <sup>1</sup>H NMR peaks for compounds **13**, **17** and **18**.<sup>a</sup>

|                           | $\delta_{\text{OH/NH}}$ | $\delta_{\text{C6OH}}$ | $\delta_{\text{C1OH}}$ | $\delta_{\text{CH=N}}$ | $\delta_{\text{C4-H}}$ | $J_{\text{CHNH}}^{\text{b}}$ |
|---------------------------|-------------------------|------------------------|------------------------|------------------------|------------------------|------------------------------|
| <b>13/16</b> <sup>c</sup> | 14.52s                  | 8.55s                  | 7.92s                  | 9.65s                  | 7.56s                  | 0.0                          |
| <b>13/16</b> <sup>d</sup> | 14.63s                  | 7.64s                  | 5.63s                  | 9.68s                  | 7.36s                  | 0.0                          |
| <b>14/17</b> <sup>c</sup> | 13.59d                  | 8.43s                  | 7.94s                  | 9.83d                  | 7.45s                  | 9.0                          |
| <b>14/17</b> <sup>d</sup> | 13.23bs                 | 7.94bs                 | 5.55s                  | 9.71s                  | 7.58s                  | -                            |
| <b>15/18</b> <sup>c</sup> | 13.38d                  | 8.43bs                 | <sup>e</sup>           | 10.03d                 | 7.40s                  | 14.0                         |

<sup>a</sup>In ppm. <sup>b</sup>In Hz. <sup>c</sup>In DMSO-*d*<sub>6</sub>. <sup>d</sup>In CDCl<sub>3</sub>. <sup>e</sup>Not observed.

**Table S4** Selected <sup>13</sup>C NMR peaks, and equilibrium data for compounds **13**, **17** and **18**.<sup>a</sup>

|                           | $\delta_{\text{C7}}$ | $\delta_{\text{CH=N}}$ | $\delta_{\text{C4}}$ | $\delta_{\text{C8}}$ | $K_{\text{T}}$ | $n_{\text{e}}(\%)$ |
|---------------------------|----------------------|------------------------|----------------------|----------------------|----------------|--------------------|
| <b>13/16</b> <sup>c</sup> | 151.33               | 147.45                 | 116.33               | 108.21               | 0.0            | 0.0                |
| <b>13/16</b> <sup>d</sup> | 160.77               | 152.78                 | 117.71               | 104.89               | 0.5            | 33                 |
| <b>14/17</b> <sup>c</sup> | 170.25               | 163.13                 | 116.38               | 101.54               | 1.9            | 66                 |
| <b>14/17</b> <sup>d</sup> | 172.16               | 163.30                 | 117.74               | 100.59               | 2.6            | 72                 |
| <b>15/18</b> <sup>c</sup> | 171.13               | 160.59                 | 116.40               | 103.25               | 2.2            | 69                 |

<sup>a</sup>In ppm. <sup>b</sup>In DMSO-*d*<sub>6</sub>. <sup>c</sup>In CDCl<sub>3</sub>.

**Table S5** Conformational data of **19/20** (angles in degrees and energies in kcal/mol).<sup>a</sup>

| Conformer                          | Minima     |            | Maxima     |            | Minima     |            | Maxima     |            |
|------------------------------------|------------|------------|------------|------------|------------|------------|------------|------------|
|                                    | <b>19a</b> | <b>19c</b> | <b>19b</b> | <b>19d</b> | <b>20b</b> | <b>20d</b> | <b>20a</b> | <b>20c</b> |
| $\theta^{\text{c}}$                | 13.7       | 215.5      | 122.5      | 294.8      | 116.0      | 296.5      | 39.7       | 196.3      |
| $\Delta E_{\text{r}}^{\text{b,c}}$ | 0.00       | -0.08      | 1.52       | 7.13       | 0.00       | 2.34       | 5.43       | 5.47       |
| $\Delta G_{\text{r}}^{\text{b,c}}$ | 0.00       | 0.46       | 2.31       | 8.19       | 0.24       | 2.77       | 6.44       | 5.50       |
| $\tilde{\nu}^{\text{c,f}}$         |            |            | -20.4      | -47.0      |            |            | -59.6      | -59.3      |
| $\theta^{\text{d}}$                | 14.3       | 215.0      | 122.2      | 294.3      | 116.1      | 296.3      | 42.9       | 194.9      |
| $\Delta E_{\text{r}}^{\text{b,d}}$ | 0.00       | -0.03      | 2.08       | 7.37       | -1.00      | 1.63       | 3.73       | 3.74       |
| $\Delta G_{\text{r}}^{\text{b,d}}$ | 0.00       | 0.82       | 1.71       | 7.87       | -1.06      | 2.80       | 4.88       | 4.92       |
| $\tilde{\nu}^{\text{d,f}}$         |            |            | -21.9      | -77.6      |            |            | -70.0      | -68.1      |
| $\theta^{\text{e}}$                | 14.6       | 214.8      | 123.9      | 296.0      | 116.6      | 295.3      | 42.8       | 194.8      |
| $\Delta E_{\text{r}}^{\text{b,e}}$ | 0.00       | -0.01      | 2.51       | 7.44       | -1.25      | 1.28       | 3.06       | 3.14       |
| $\Delta G_{\text{r}}^{\text{b,e}}$ | 0.00       | 0.95       | 2.96       | 7.83       | -1.05      | 3.14       | 4.30       | 4.11       |
| $\tilde{\nu}^{\text{e,f}}$         |            |            | -27.4      | -28.7      |            |            | -64.9      | -68.5      |

<sup>a</sup>At the M06-2X/6-311G(d,p) level. <sup>b</sup>Relative energy with respect to that of **19a**. <sup>c</sup>In the gas phase.

<sup>d</sup>Including the solvent effect (SMD model, CHCl<sub>3</sub> as solvent). <sup>e</sup>Including the solvent effect (SMD model, DMSO as solvent). <sup>f</sup>Imaginary frequency of the transition state in cm<sup>-1</sup>.

**Table S6** Conformational data of **21** (angles in degrees and energies in kcal/mol).<sup>a</sup>

| Conformer           | Minima     |            |            | Maxima     |            |            |
|---------------------|------------|------------|------------|------------|------------|------------|
|                     | <b>21a</b> | <b>21b</b> | <b>21c</b> | <b>21e</b> | <b>21f</b> | <b>21d</b> |
| $\theta^c$          | 347.5      | 105.6      | 239.7      | 42.3       | 186.3      | 304.8      |
| $\Delta E_r^{b,c}$  | 4.99       | 1.45       | 4.99       | 8.81       | 8.81       | 8.22       |
| $\Delta G_r^{b,c}$  | 4.65       | 1.82       | 4.65       | 9.07       | 9.07       | 8.62       |
| $\tilde{\nu}^{c,f}$ |            |            |            | -152.0     | -152.0     | -24.3      |
| $\theta^d$          | 348.1      | 106.1      | 239.6      | 43.7       | 185.4      | 307.0      |
| $\Delta E_r^{b,d}$  | 6.37       | 2.98       | 6.37       | 10.18      | 10.18      | 9.38       |
| $\Delta G_r^{b,d}$  | 6.83       | 3.55       | 6.82       | 10.67      | 10.63      | 10.63      |
| $\tilde{\nu}^{d,f}$ |            |            |            | -152.5     | -161.6     | -36.2      |
| $\theta^e$          | 348.3      | 107.6      | 239.6      | 44.1       | 185.3      | 307.9      |
| $\Delta E_r^{b,e}$  | 6.92       | 3.74       | 6.92       | 10.73      | 10.73      | 9.67       |
| $\Delta G_r^{b,e}$  | 7.04       | 3.69       | 7.04       | 10.83      | 10.83      | 10.15      |
| $\tilde{\nu}^{e,f}$ |            |            |            | -152.9     | -152.9     | -37.0      |

<sup>a</sup>At the M06-2X/6-311G(d,p) level. <sup>b</sup>Relative energy with respect to that of **26b**. <sup>c</sup>In the gas phase. <sup>d</sup>Including the solvent effect (SMD model, CHCl<sub>3</sub> as solvent). <sup>e</sup>Including the solvent effect (SMD model, DMSO as solvent). <sup>f</sup>Imaginary frequency of the transition structure in cm<sup>-1</sup>.

**Table S7** Conformational data of **22** (angles in degrees and energies in kcal/mol).<sup>a</sup>

| Conformer           | Minima     |            | Maxima     |            |
|---------------------|------------|------------|------------|------------|
|                     | <b>22b</b> | <b>22d</b> | <b>22a</b> | <b>22c</b> |
| $\theta^c$          | 116.6      | 308.2      | 35.6       | 196.2      |
| $\Delta E_r^{b,c}$  | 0.00       | 2.54       | 12.26      | 12.26      |
| $\Delta G_r^{b,c}$  | 0.00       | 3.08       | 12.30      | 12.31      |
| $\tilde{\nu}^{c,f}$ |            |            | -115.5     | -115.4     |
| $\theta^d$          | 115.1      | 312.1      | 36.8       | 194.7      |
| $\Delta E_r^{b,d}$  | 0.00       | 2.80       | 12.24      | 12.24      |
| $\Delta G_r^{b,d}$  | 0.00       | 4.53       | 12.52      | 12.51      |
| $\tilde{\nu}^{d,f}$ |            |            | -110.9     | -110.9     |
| $\theta^e$          | 114.8      | 293.9      | 37.4       | 194.2      |
| $\Delta E_r^{b,e}$  | 0.00       | 2.78       | 12.28      | 12.28      |
| $\Delta G_r^{b,e}$  | 0.00       | 4.29       | 12.41      | 12.41      |
| $\tilde{\nu}^{e,f}$ |            |            | -104.1     | -104.1     |

<sup>a</sup>At the M06-2X/6-311G(d,p) level. <sup>b</sup>Relative free energy with respect to that of **22b**. <sup>c</sup>In the gas phase. <sup>d</sup>Including the solvent effect (SMD model, CHCl<sub>3</sub> as solvent). <sup>e</sup>Including the solvent effect (SMD model, DMSO as solvent). <sup>f</sup>Imaginary frequency of the transition structure in cm<sup>-1</sup>.

**Table S8** NBO data of 19/20.<sup>a,b</sup>

| Donor           | Acceptor         | 19a   | 19b   | 19c   | 19d   | 20d   | 20a   | 20b   | 20c   |
|-----------------|------------------|-------|-------|-------|-------|-------|-------|-------|-------|
| LP(1) O25       | BD*(1) C1 - C6   | 6.59  | 6.66  | 6.57  | 6.63  | 6.21  | 6.18  | 6.18  | 6.18  |
| LP(2) O25       | BD*(2) C1 - C2   | 34.25 | 34.38 | 34.25 | 34.70 | 38.44 | 37.71 | 38.04 | 37.74 |
| LP(1) O27       | BD*(1) C5 - C6   | 8.22  | 8.61  | 8.25  | 8.81  | 2.94  | 5.44  | 3.32  | 5.33  |
| LP(1) O27       | BD*(1) O25 - H26 | 2.86  | 2.79  | 2.88  | 2.82  | 1.08  | 2.07  | 1.24  | 2.00  |
| LP(1) O27       | BD*(1) N34 - H28 |       |       |       |       | 3.65  | 7.60  | 4.72  | 7.45  |
| LP(2) O27       | BD*(2) C5 - C6   | 40.81 | 45.27 | 40.96 | 47.98 |       |       |       |       |
| LP(2) O27       | BD*(1) C1 - C6   |       |       |       |       | 18.32 | 17.23 | 18.25 | 17.36 |
| LP(2) O27       | BD*(1) C5 - C6   |       |       |       |       | 16.30 | 10.76 | 15.40 | 11.00 |
| LP(2) O27       | BD*(1) O25 - H26 |       |       |       |       | 5.82  | 4.58  | 5.73  | 4.60  |
| LP(2) O27       | BD*(1) N34 - H28 |       |       |       |       | 6.79  | 26.02 | 8.92  | 24.83 |
| LP(3) O27       | BD*(2) C5 - C6   |       |       |       |       |       |       |       |       |
| LP(1) N34       | BD*(1) C15 - H16 | 9.78  | 7.56  | 9.76  | 9.02  |       |       |       |       |
| LP(1) N34       | BD*(1) O27 - H28 | 37.18 | 43.60 | 36.34 |       |       |       |       |       |
| LP(1) N34       | BD*(1) C35 - N50 | 10.25 |       |       | 2.75  | 4.61  |       | 4.04  |       |
| LP(1) N34       | BD*(1) C36 - N50 |       |       | 10.12 | 3.15  | 4.90  |       | 3.54  |       |
| LP(1) N34       | BD*(2) C5 - C15  |       |       |       |       | 86.34 |       | 86.77 |       |
| LP(1) N50       | BD*(1) C15 - N34 |       |       | 2.10  | 6.87  | 9.32  | 0.78  | 1.09  | 0.78  |
| LP(1) N50       | BD*(2) C15 - N34 | 28.13 |       | 27.84 |       |       | 13.32 |       | 13.14 |
| LP(1) N50       | BD*(1) C35 - H38 | 8.58  | 7.33  | 7.84  | 9.11  | 8.49  | 7.50  | 7.48  | 7.36  |
| LP(1) N50       | BD*(1) C36 - H41 | 7.96  | 7.30  | 8.53  | 9.23  | 8.52  | 7.37  | 7.51  | 7.47  |
| LP(1) N50       | BD*(1) N34 - H28 |       |       |       |       | 3.94  |       | 8.86  |       |
| LP(1) O32       | BD*(1) C8 - C9   | 5.52  | 5.76  | 5.51  | 5.58  | 5.45  | 5.40  | 5.60  | 5.40  |
| LP(1) O32       | BD*(1) C15 - H16 | 1.98  | 1.29  | 2.04  | 2.43  | 2.52  | 2.85  | 1.63  | 2.47  |
| LP(2) O32       | BD*(2) C8 - C9   | 30.75 | 31.79 | 30.81 | 30.76 | 29.19 | 29.01 | 29.98 | 28.97 |
| BD(1) O32 - H33 | BD*(1) C4 - C8   | 5.07  | 5.09  | 5.07  | 5.03  | 4.88  | 4.88  | 4.92  | 4.87  |

<sup>a</sup>At the M06-2X/6-311G(d,p) level in gas phase. <sup>b</sup>In kcal/mol

**Table S9** NBO data of 19/20.<sup>a,b,c</sup>

| Donor           | Acceptor         | 19a   | 19b   | 19c   | 19d   | 20d   | 20a    | 20b   | 20c    |
|-----------------|------------------|-------|-------|-------|-------|-------|--------|-------|--------|
| LP(1) O25       | BD*(1) C1 - C6   | 6.64  | 6.74  | 6.63  | 6.70  | 6.18  | 6.09   | 6.11  | 6.12   |
| LP(2) O25       | BD*(2) C1 - C2   | 34.14 | 34.24 | 34.12 | 34.41 | 37.60 | 37.08  | 37.33 | 37.15  |
| LP(1) O27       | BD*(1) C5 - C6   | 8.22  | 8.60  | 8.24  | 8.74  | 2.88  | 4.59   | 3.08  | 4.59   |
| LP(1) O27       | BD*(1) O25 - H26 | 2.58  | 2.44  | 2.60  | 2.47  | 1.01  | 1.77   | 1.14  | 1.76   |
| LP(1) O27       | BD*(1) N34 - H28 |       |       |       |       | 3.35  | 6.69   | 4.09  | 6.66   |
| LP(2) O27       | BD*(2) C5 - C6   | 40.66 | 45.07 | 40.77 | 47.43 |       |        |       |        |
| LP(2) O27       | BD*(1) C1 - C6   |       |       |       |       | 18.06 | 17.45  | 18.00 | 17.48  |
| LP(2) O27       | BD*(1) C5 - C6   |       |       |       |       | 16.08 | 12.07  | 15.55 | 12.11  |
| LP(2) O27       | BD*(1) O25 - H26 |       |       |       |       | 5.73  | 5.15   | 5.85  | 5.14   |
| LP(2) O27       | BD*(1) N34 - H28 |       |       |       |       | 6.27  | 18.23  | 7.37  | 18.23  |
| LP(3) O27       | BD*(2) C5 - C6   |       |       |       |       |       | 105.05 |       | 105.31 |
| LP(1) N34       | BD*(1) C15 - H16 | 9.72  | 7.69  | 9.70  | 8.92  |       |        |       |        |
| LP(1) N34       | BD*(1) O27 - H28 | 39.28 | 44.95 | 38.31 | 57.18 |       |        |       |        |
| LP(1) N34       | BD*(1) C35 - N50 | 10.08 |       |       | 2.61  |       |        |       |        |
| LP(1) N34       | BD*(1) C36 - N50 |       |       | 9.94  | 3.21  |       |        |       |        |
| LP(1) N34       | BD*(2) C5 - C15  |       |       |       |       |       |        |       |        |
| LP(1) N50       | BD*(1) C15 - N34 |       |       |       | 7.05  | 9.39  | 0.54   | 0.99  | 0.66   |
| LP(1) N50       | BD*(2) C15 - N34 | 29.73 |       | 29.32 |       |       | 13.84  |       | 13.89  |
| LP(1) N50       | BD*(1) C35 - H38 | 8.09  | 7.04  | 7.45  | 8.55  | 8.02  | 7.00   | 7.03  | 6.96   |
| LP(1) N50       | BD*(1) C36 - H41 | 7.56  | 7.01  | 8.06  | 8.69  | 8.06  | 7.01   | 7.07  | 6.96   |
| LP(1) N50       | BD*(1) N34 - H28 |       |       |       |       | 3.86  | 0.69   | 8.71  |        |
| LP(1) O32       | BD*(1) C8 - C9   | 5.84  | 6.02  | 5.83  | 5.88  | 5.74  | 5.76   | 5.87  | 5.73   |
| LP(1) O32       | BD*(1) C15 - H16 | 1.57  | 1.06  | 1.66  | 2.01  | 2.41  | 2.26   | 1.51  | 2.27   |
| LP(2) O32       | BD*(2) C8 - C9   | 32.58 | 33.11 | 32.60 | 32.31 | 30.83 | 30.83  | 31.40 | 30.86  |
| BD(1) O32 - H33 | BD*(1) C4 - C8   | 5.25  | 5.25  | 5.25  | 5.20  | 5.06  | 5.05   | 5.09  | 5.06   |

<sup>a</sup>At the M06-2X/6-311G(d,p) level. <sup>b</sup>Including the solvent effect (SMD model, CHCl<sub>3</sub> as solvent). <sup>c</sup>In kcal/mol.

Table S10 NBO data of 19/20.<sup>a,b,c</sup>

| Donor           | Acceptor         | 19a   | 19b   | 19c   | 19d   | 20d   | 20a    | 20b   | 20c    |
|-----------------|------------------|-------|-------|-------|-------|-------|--------|-------|--------|
| LP(1) O25       | BD*(1) C1 - C6   | 6.64  | 6.71  | 6.62  | 6.67  | 6.13  | 6.05   | 6.08  | 6.07   |
| LP(2) O25       | BD*(2) C1 - C2   | 34.30 | 34.36 | 34.23 | 34.36 | 37.79 | 37.38  | 37.62 | 37.38  |
| LP(1) O27       | BD*(1) C5 - C6   | 8.25  | 8.62  | 8.27  | 8.75  | 2.76  | 4.24   | 2.90  | 4.21   |
| LP(1) O27       | BD*(1) O25 - H26 | 2.70  | 2.53  | 2.70  | 2.63  | 1.09  | 1.81   | 1.19  | 1.80   |
| LP(1) O27       | BD*(1) N34 - H28 |       |       |       |       | 3.28  | 6.53   | 3.90  | 6.45   |
| LP(2) O27       | BD*(2) C5 - C6   | 41.27 | 45.40 | 41.17 | 48.04 |       |        |       |        |
| LP(2) O27       | BD*(1) C1 - C6   |       |       |       |       | 17.93 | 17.53  | 17.94 | 17.56  |
| LP(2) O27       | BD*(1) C5 - C6   |       |       |       |       | 16.19 | 12.70  | 15.87 | 12.78  |
| LP(2) O27       | BD*(1) O25 - H26 |       |       |       |       | 6.32  | 5.83   | 6.39  | 5.86   |
| LP(2) O27       | BD*(1) N34 - H28 |       |       |       |       | 5.94  | 15.98  | 6.63  | 15.80  |
| LP(3) O27       | BD*(2) C5 - C6   |       |       |       |       |       | 106.40 |       | 106.72 |
| LP(1) N34       | BD*(1) C15 - H16 | 9.62  | 7.73  | 9.60  | 8.68  |       |        |       |        |
| LP(1) N34       | BD*(1) O27 - H28 | 42.27 | 46.35 | 40.92 | 62.71 |       |        |       |        |
| LP(1) N34       | BD*(1) C35 - N50 | 10.04 |       |       | 2.78  |       |        |       |        |
| LP(1) N34       | BD*(1) C36 - N50 |       |       | 9.89  | 2.97  |       |        |       |        |
| LP(1) N34       | BD*(2) C5 - C15  |       |       |       |       |       |        |       |        |
| LP(1) N50       | BD*(1) C15 - N34 | 2.09  |       | 2.12  | 7.20  | 9.40  | 0.56   | 0.95  | 0.65   |
| LP(1) N50       | BD*(2) C15 - N34 | 30.63 |       | 30.20 |       |       | 14.38  |       | 14.42  |
| LP(1) N50       | BD*(1) C35 - H38 | 7.85  | 6.90  | 7.29  | 8.29  | 7.76  | 6.83   | 6.84  | 6.82   |
| LP(1) N50       | BD*(1) C36 - H41 | 7.37  | 6.90  | 7.85  | 8.37  | 7.83  | 6.88   | 6.87  | 6.78   |
| LP(1) N50       | BD*(1) N34 - H28 |       |       |       |       | 3.81  | 0.67   | 8.62  |        |
| LP(1) O32       | BD*(1) C8 - C9   | 5.90  | 6.04  | 5.87  | 5.89  | 5.80  | 5.81   | 5.88  | 5.79   |
| LP(1) O32       | BD*(1) C15 - H16 | 1.48  | 0.94  | 1.60  | 2.43  | 2.38  | 2.30   | 1.63  | 2.25   |
| LP(2) O32       | BD*(2) C8 - C9   | 33.19 | 33.33 | 33.11 | 32.68 | 31.44 | 31.55  | 31.77 | 31.46  |
| BD(1) O32 - H33 | BD*(1) C4 - C8   | 5.34  | 5.32  | 5.34  | 5.29  | 5.15  | 5.15   | 5.18  | 5.15   |

<sup>a</sup>At the M06-2X/6-311G(d,p) level. <sup>b</sup>Including the solvent effect (SMD model, DMSO as solvent). <sup>c</sup>In kcal/mol

Table S11 NBO data of 21/22.<sup>a,b</sup>

| Donor           | Acceptor         | 21a   | 21e   | 21b   | 21f   | 21c   | 21d   | 22d   | 22b   | 22a   | 22c   |
|-----------------|------------------|-------|-------|-------|-------|-------|-------|-------|-------|-------|-------|
| LP(1) O25       | BD*(1) C1 - C6   | 6.58  | 6.58  | 6.64  | 6.58  | 6.58  | 6.61  | 6.16  | 6.17  | 6.18  | 6.17  |
| LP(2) O25       | BD*(2) C1 - C2   | 34.39 | 34.32 | 34.28 | 34.32 | 34.39 | 34.69 | 38.26 | 37.53 | 37.97 | 37.54 |
| LP(1) O27       | BD*(1) C5 - C6   | 8.30  | 8.22  | 8.41  | 8.22  | 8.30  | 8.79  | 2.95  | 6.23  | 3.40  | 6.23  |
| LP(1) O27       | BD*(1) O25 - H26 | 2.75  | 2.89  | 2.61  | 2.89  | 2.75  | 2.75  | 1.01  | 2.33  | 1.27  | 2.33  |
| LP(1) O27       | BD*(1) N34 - H28 |       |       |       |       |       |       | 3.32  | 8.50  | 4.88  | 8.50  |
| LP(2) O27       | BD*(2) C5 - C6   | 42.27 | 41.57 | 43.31 | 41.57 | 42.27 | 47.88 |       |       |       |       |
| LP(2) O27       | BD*(1) C1 - C6   |       |       |       |       |       |       | 18.38 | 16.41 | 18.17 | 16.41 |
| LP(2) O27       | BD*(1) C5 - C6   |       |       |       |       |       |       | 16.29 | 9.01  | 15.19 | 9.01  |
| LP(2) O27       | BD*(1) O25 - H26 |       |       |       |       |       |       | 5.67  | 4.00  | 5.69  | 4.01  |
| LP(2) O27       | BD*(1) N34 - H28 |       |       |       |       |       |       | 6.57  | 33.84 | 9.34  | 33.83 |
| LP(3) O27       | BD*(2) C5 - C6   |       |       |       |       |       |       |       | 99.11 |       | 99.12 |
| LP(1) N34       | BD*(1) C15 - H16 | 10.04 | 9.37  | 8.12  | 9.37  | 10.04 | 9.23  |       |       |       |       |
| LP(1) N34       | BD*(1) O27 - H28 | 46.06 | 48.03 | 38.55 | 48.03 | 46.03 |       |       |       |       |       |
| LP(1) N34       | BD*(1) C35 - N50 | 9.25  | 6.93  | 0.64  |       |       | 3.84  | 3.15  |       | 3.65  |       |
| LP(1) N34       | BD*(1) C36 - N50 |       |       |       | 6.93  | 9.25  | 1.91  | 5.80  |       | 3.63  |       |
| LP(1) N34       | BD*(2) C5 - C15  |       |       |       |       |       |       | 87.58 |       | 86.93 |       |
| LP(1) N50       | BD*(1) C15 - N34 | 4.38  |       |       |       | 4.38  | 6.71  | 9.06  | 0.74  | 1.07  | 0.74  |
| LP(1) N50       | BD*(2) C15 - N34 | 17.34 | 23.90 | 0.79  | 23.89 | 17.34 | 0.41  |       | 14.55 |       | 14.55 |
| LP(1) N50       | BD*(1) C35 - H38 | 8.84  | 6.50  | 7.18  | 6.92  | 7.79  | 9.35  | 8.65  | 6.53  | 7.40  | 6.75  |
| LP(1) N50       | BD*(1) C36 - H41 | 7.79  | 6.92  | 7.26  | 6.50  | 8.84  | 8.79  | 8.05  | 6.75  | 7.38  | 6.53  |
| LP(1) N50       | BD*(1) N34 - H28 |       |       |       |       |       |       | 3.49  | 0.67  | 8.81  | 0.67  |
| LP(1) O32       | BD*(1) C8 - C9   | 5.48  | 5.37  | 5.83  | 5.37  | 5.48  | 5.61  | 5.51  | 5.33  | 5.58  | 5.33  |
| LP(1) O32       | BD*(1) C15 - H16 | 2.19  | 4.16  | 0.50  | 4.16  | 2.20  | 2.05  | 1.38  | 3.76  | 1.48  | 3.76  |
| LP(2) O32       | BD*(2) C8 - C9   | 30.37 | 30.29 | 31.73 | 30.29 | 30.37 | 30.84 | 29.15 | 28.56 | 29.93 | 28.56 |
| BD(1) O32 - H33 | BD*(1) C4 - C8   | 5.00  | 5.07  | 5.05  | 5.07  | 5.00  | 5.02  | 4.86  | 4.83  | 4.93  | 4.83  |

<sup>a</sup>At the M06-2X/6-311G(d,p) level in gas phase. <sup>b</sup>In kcal/mol

Table S12 NBO data of 21/22.<sup>a,b,c</sup>

| Donor           | Acceptor         | 21a   | 21e   | 21b   | 21f   | 21c   | 21d   | 22d   | 22b   | 22a   | 22c   |
|-----------------|------------------|-------|-------|-------|-------|-------|-------|-------|-------|-------|-------|
| LP(1) O25       | BD*(1) C1 - C6   | 6.64  | 6.64  | 6.72  | 6.65  | 6.64  | 6.67  | 6.13  | 6.11  | 6.11  | 6.11  |
| LP(2) O25       | BD*(2) C1 - C2   | 34.25 | 34.15 | 34.14 | 34.17 | 34.25 | 34.42 | 37.43 | 36.96 | 37.28 | 36.96 |
| LP(1) O27       | BD*(1) C5 - C6   | 8.30  | 8.24  | 8.42  | 8.25  | 8.30  | 8.70  | 2.93  | 5.66  | 3.12  | 5.66  |
| LP(1) O27       | BD*(1) O25 - H26 | 2.45  | 2.55  | 2.30  | 2.58  | 2.45  | 2.41  | 0.98  | 2.14  | 1.15  | 2.14  |
| LP(1) O27       | BD*(1) N34 - H28 |       |       |       |       |       |       | 3.18  | 8.14  | 4.15  | 8.14  |
| LP(2) O27       | BD*(2) C5 - C6   | 42.36 | 41.66 | 43.41 | 41.75 | 42.36 | 47.08 |       |       |       |       |
| LP(2) O27       | BD*(1) C1 - C6   |       |       |       |       |       |       | 18.08 | 16.74 | 17.93 | 16.74 |
| LP(2) O27       | BD*(1) C5 - C6   |       |       |       |       |       |       | 15.95 | 9.85  | 15.43 | 9.85  |
| LP(2) O27       | BD*(1) O25 - H26 |       |       |       |       |       |       | 5.60  | 4.41  | 5.83  | 4.41  |
| LP(2) O27       | BD*(1) N34 - H28 |       |       |       |       |       |       | 6.37  | 27.33 | 7.58  | 27.33 |
| LP(3) O27       | BD*(2) C5 - C6   |       |       |       |       |       |       |       | 98.20 |       | 98.20 |
| LP(1) N34       | BD*(1) C15 - H16 | 9.93  | 9.40  | 8.11  | 9.32  | 9.93  | 9.15  |       |       |       |       |
| LP(1) N34       | BD*(1) O27 - H28 | 48.87 | 50.15 | 40.27 | 50.90 | 48.87 | 56.93 |       |       |       |       |
| LP(1) N34       | BD*(1) C35 - N50 | 9.06  | 6.70  | 0.60  |       |       | 3.99  |       |       |       |       |
| LP(1) N34       | BD*(1) C36 - N50 |       |       |       | 6.70  | 9.06  | 1.75  |       |       |       |       |
| LP(1) N34       | BD*(2) C5 - C15  |       |       |       |       |       |       |       |       |       |       |
| LP(1) N50       | BD*(1) C15 - N34 | 4.45  |       |       |       | 4.45  | 6.81  | 8.99  | 0.64  | 0.97  | 0.64  |
| LP(1) N50       | BD*(2) C15 - N34 | 17.62 | 24.23 | 0.73  | 24.42 | 17.62 | 0.82  | 0.86  | 15.55 |       | 15.55 |
| LP(1) N50       | BD*(1) C35 - H38 | 8.31  | 6.20  | 6.88  | 6.65  | 7.40  | 8.86  | 8.21  | 6.06  | 7.00  | 6.39  |
| LP(1) N50       | BD*(1) C36 - H41 | 7.40  | 6.68  | 6.98  | 6.14  | 8.31  | 8.30  | 7.58  | 6.39  | 7.02  | 6.06  |
| LP(1) N50       | BD*(1) N34 - H28 |       |       |       |       |       |       | 3.37  | 0.79  | 7.73  | 0.79  |
| LP(1) O32       | BD*(1) C8 - C9   | 5.77  | 5.74  | 6.07  | 5.70  | 5.77  | 5.92  | 5.78  | 5.68  | 5.85  | 5.68  |
| LP(1) O32       | BD*(1) C15 - H16 | 2.08  | 3.69  | 0.50  | 4.03  | 2.08  | 1.55  | 1.48  | 3.59  | 1.34  | 3.59  |
| LP(2) O32       | BD*(2) C8 - C9   | 32.04 | 32.14 | 33.17 | 32.04 | 5.18  | 32.41 | 30.81 | 30.52 | 31.39 | 30.52 |
| BD(1) O32 - H33 | BD*(1) C4 - C8   | 5.18  | 5.21  | 5.22  | 5.22  | 32.04 | 5.18  | 5.04  | 5.01  | 5.09  | 5.01  |

<sup>a</sup>At the M06-2X/6-311G(d,p) level. <sup>b</sup>The solvent effect (SMD model, CHCl<sub>3</sub> as solvent). <sup>c</sup>In kcal/mol.

Table S13 NBO data of 21/22.<sup>a,b,c</sup>

| Donor           | Acceptor         | 21a   | 21e   | 21b   | 21f   | 21c   | 21d   | 22d   | 22b   | 22a   | 22c   |
|-----------------|------------------|-------|-------|-------|-------|-------|-------|-------|-------|-------|-------|
| LP(1) O25       | BD*(1) C1 - C6   | 6.62  | 6.62  | 6.71  | 6.62  | 6.62  | 6.65  | 6.12  | 6.08  | 6.06  | 6.08  |
| LP(2) O25       | BD*(2) C1 - C2   | 34.35 | 34.31 | 34.31 | 34.31 | 34.35 | 34.44 | 37.76 | 37.25 | 37.58 | 37.25 |
| LP(1) O27       | BD*(1) C5 - C6   | 8.35  | 8.27  | 8.49  | 8.27  | 8.35  | 8.67  | 2.78  | 5.35  | 2.94  | 5.35  |
| LP(1) O27       | BD*(1) O25 - H26 | 2.56  | 2.66  | 2.45  | 2.66  | 2.56  | 2.50  | 1.09  | 2.21  | 1.19  | 2.21  |
| LP(1) O27       | BD*(1) N34 - H28 |       |       |       |       |       |       | 3.26  | 8.13  | 3.93  | 8.13  |
| LP(2) O27       | BD*(2) C5 - C6   | 42.93 | 41.96 | 44.21 | 41.96 | 42.93 | 47.20 |       |       |       |       |
| LP(2) O27       | BD*(1) C1 - C6   |       |       |       |       |       |       | 17.94 | 16.93 | 17.90 | 16.93 |
| LP(2) O27       | BD*(1) C5 - C6   |       |       |       |       |       |       | 16.15 | 10.41 | 15.78 | 10.41 |
| LP(2) O27       | BD*(1) O25 - H26 |       |       |       |       |       |       | 6.31  | 4.94  | 6.39  | 4.94  |
| LP(2) O27       | BD*(1) N34 - H28 |       |       |       |       |       |       | 5.93  | 24.81 | 6.77  | 24.81 |
| LP(3) O27       | BD*(2) C5 - C6   |       |       |       |       |       |       |       | 99.43 |       | 99.43 |
| LP(1) N34       | BD*(1) C15 - H16 | 9.76  | 9.43  | 8.09  | 9.43  | 9.76  | 9.00  |       |       |       |       |
| LP(1) N34       | BD*(1) O27 - H28 |       |       | 43.41 |       |       | 59.66 |       |       |       |       |
| LP(1) N34       | BD*(1) C35 - N50 | 8.97  | 6.68  | 0.56  |       |       | 4.06  |       |       |       |       |
| LP(1) N34       | BD*(1) C36 - N50 |       |       |       | 6.68  | 8.97  | 1.68  |       |       |       |       |
| LP(1) N34       | BD*(2) C5 - C15  |       |       |       |       |       |       |       |       |       |       |
| LP(1) N50       | BD*(1) C15 - N34 | 4.50  |       |       |       | 4.50  | 6.89  | 9.25  | 0.61  | 0.93  | 0.61  |
| LP(1) N50       | BD*(2) C15 - N34 | 17.82 | 24.59 | 0.59  | 24.59 | 17.82 | 0.92  |       | 15.85 |       | 15.85 |
| LP(1) N50       | BD*(1) C35 - H38 | 8.05  | 6.13  | 6.71  | 6.57  | 7.22  | 8.51  | 7.66  | 5.88  | 6.80  | 6.26  |
| LP(1) N50       | BD*(1) C36 - H41 | 7.22  | 6.57  | 6.81  | 6.13  | 8.05  | 7.99  | 7.78  | 6.23  | 6.82  | 5.88  |
| LP(1) N50       | BD*(1) N34 - H28 |       |       |       |       |       |       | 3.75  | 0.85  | 8.63  | 0.85  |
| LP(1) O32       | BD*(1) C8 - C9   | 5.80  | 5.76  | 6.07  | 5.76  | 5.80  | 5.96  | 5.79  | 5.74  | 5.86  | 5.74  |
| LP(1) O32       | BD*(1) C15 - H16 | 2.20  | 3.55  | 0.56  | 3.55  | 2.20  | 1.45  | 2.39  | 3.38  | 1.35  | 3.38  |
| LP(2) O32       | BD*(2) C8 - C9   | 32.41 | 32.58 | 33.36 | 32.58 | 32.41 | 32.87 | 31.44 | 31.18 | 31.71 | 31.18 |
| BD(1) O32 - H33 | BD*(1) C4 - C8   | 5.27  | 5.31  | 5.30  | 5.31  | 5.27  | 5.28  | 5.15  | 5.12  | 5.18  | 5.12  |

<sup>a</sup>At the M06-2X/6-311G(d,p) level. <sup>b</sup>Including the solvent effect (SMD model, DMSO as solvent). <sup>c</sup>In kcal/mol.

Table S14 NBO data of 23/24.<sup>a,b</sup>

| Donor           | Acceptor         | 23 <sup>c</sup> | TS <sub>23/24</sub> <sup>c</sup> | 24 <sup>c</sup> | 23 <sup>d</sup> | TS <sub>23/24</sub> <sup>d</sup> | 24 <sup>d</sup> | 23 <sup>e</sup> | TS <sub>23/24</sub> <sup>e</sup> | 24 <sup>e</sup> |
|-----------------|------------------|-----------------|----------------------------------|-----------------|-----------------|----------------------------------|-----------------|-----------------|----------------------------------|-----------------|
| LP(1) O25       | BD*(1) C1 - C6   | 6.67            | 6.43                             | 6.25            | 6.68            | 6.41                             | 6.14            | 6.70            | 6.44                             | 6.14            |
| LP(2) O25       | BD*(2) C1 - C2   | 34.48           | 35.80                            | 38.06           | 34.41           | 35.27                            | 37.65           | 34.31           | 35.22                            | 37.25           |
| LP(1) O27       | BD*(1) C5 - C6   | 8.57            | 9.10                             | 3.67            | 8.59            | 9.00                             | 3.21            | 8.54            | 9.02                             | 3.37            |
| LP(1) O27       | BD*(1) O25 - H26 | 2.56            | 2.77                             | 1.24            | 2.47            | 2.79                             | 1.23            | 2.35            | 2.66                             | 1.14            |
| LP(1) O27       | BD*(1) N34 - H28 |                 |                                  | 5.18            |                 |                                  | 4.47            |                 |                                  | 4.52            |
| LP(2) O27       | BD*(2) C5 - C6   | 46.21           |                                  |                 | 47.10           | 57.87                            |                 | 46.15           | 64.95                            |                 |
| LP(2) O27       | BD*(1) C1 - C6   |                 | 9.99                             | 18.40           |                 |                                  | 18.17           |                 |                                  | 18.21           |
| LP(2) O27       | BD*(1) C5 - C6   |                 | 2.72                             | 14.91           |                 |                                  | 15.34           |                 |                                  | 15.13           |
| LP(2) O27       | BD*(1) O25 - H26 |                 | 1.47                             | 5.17            |                 |                                  | 5.96            |                 |                                  | 5.36            |
| LP(2) O27       | BD*(1) N34 - H28 |                 |                                  | 11.21           |                 |                                  | 8.70            |                 |                                  | 9.19            |
| LP(3) O27       | BD*(1) C1 - C6   | 5.79            |                                  |                 |                 | 8.63                             |                 |                 | 9.31                             |                 |
| LP(3) O27       | BD*(2) C5 - C6   |                 | 70.72                            |                 |                 | 4.00                             |                 |                 | 2.37                             |                 |
| LP(1) N34       | BD*(1) C15 - H16 | 10.72           | 8.60                             |                 | 10.42           | 8.78                             |                 | 10.57           | 8.71                             |                 |
| LP(1) N34       | BD*(1) O27 - H28 |                 |                                  |                 | 56.43           |                                  |                 | 50.75           |                                  |                 |
| LP(1) N34       | BD*(1) C36 - C37 | 1.96            | 1.80                             | 6.06            | 1.90            | 1.80                             |                 | 1.94            | 2.95                             |                 |
| LP(1) N34       | BD*(1) C36 - C40 | 2.38            | 2.14                             | 7.02            | 2.29            | 2.05                             |                 | 2.27            | 1.91                             |                 |
| LP(1) N34       | BD*(1) C36 - C43 | 2.77            | 3.05                             |                 | 2.75            | 2.93                             |                 | 2.73            | 1.95                             |                 |
| LP(1) N34       | BD*(2) C5 - C15  |                 |                                  | 84.09           |                 |                                  |                 |                 |                                  |                 |
| LP(1) O32       | BD*(1) C8 - C9   | 5.60            | 5.55                             | 5.47            | 5.97            | 5.94                             | 5.87            | 5.92            | 5.84                             | 5.79            |
| LP(1) O32       | BD*(1) C15 - H16 | 1.97            | 2.61                             | 2.24            | 1.46            | 1.99                             | 1.57            | 1.52            | 2.51                             | 1.73            |
| LP(2) O32       | BD*(2) C8 - C9   | 30.64           | 29.98                            | 29.20           | 32.90           | 32.43                            | 31.60           | 32.34           | 31.80                            | 30.83           |
| BD(1) O32 - H33 | BD*(1) C4 - C8   | 5.02            | 4.94                             | 4.88            | 5.29            | 5.22                             | 5.16            | 5.19            | 5.15                             | 5.06            |

<sup>a</sup>At the M06-2X/6-311G(d,p) level. <sup>b</sup>In kcal/mol. <sup>c</sup>In gas phase. <sup>d</sup>Including the solvent effect (SMD model, CHCl<sub>3</sub> as solvent). <sup>e</sup>Including the solvent effect (SMD model, DMSO as solvent).

Table S15 NBO data of 13/16 and 14/17.<sup>a,b</sup>

| Donor           | Acceptor         | 13cc  | 13aa  | 16dd  | 16bb  | 14aa  | 14bb  | 17dd  | 17bb  |
|-----------------|------------------|-------|-------|-------|-------|-------|-------|-------|-------|
| LP(1) O25       | BD*(1) C1 - C6   | 6.62  | 6.61  | 6.24  | 6.23  | 6.63  | 6.66  | 6.26  | 6.21  |
| LP(2) O25       | BD*(1) C1 - C2   | 34.71 | 34.70 | 38.97 | 38.62 | 34.95 | 34.81 | 38.97 | 38.52 |
| LP(1) O27       | BD*(1) C5 - C6   | 8.28  | 8.30  | 2.87  | 3.21  | 8.40  | 8.52  | 2.97  | 3.25  |
| LP(1) O27       | BD*(1) O25 - H26 | 2.94  | 3.00  | 1.04  | 1.20  | 2.87  | 2.70  | 1.07  | 1.16  |
| LP(1) O27       | BD*(1) N34 - H28 |       |       | 3.42  | 4.45  |       |       | 3.65  | 4.34  |
| LP(2) O27       | BD*(1) C1 - C6   |       |       | 18.42 | 18.31 |       |       | 18.44 | 18.37 |
| LP(2) O27       | BD*(2) C5 - C6   | 41.45 | 41.53 | 16.47 | 15.61 | 43.04 | 44.45 | 16.28 | 15.54 |
| LP(2) O27       | BD*(1) O25 - H26 |       |       | 5.81  | 5.78  |       |       | 5.77  | 5.64  |
| LP(2) O27       | BD*(1) N34 - H28 |       |       | 6.34  | 8.22  |       |       | 6.82  | 8.22  |
| LP(1) N34       | BD*(1) C15 - H16 | 9.65  | 9.50  |       |       | 9.76  | 7.90  |       |       |
| LP(1) N34       | BD*(1) O27 - H28 | 39.58 | 40.53 |       |       | 49.79 |       |       |       |
| LP(1) N34       | BD*(1) C35 - N50 | 10.27 | 10.30 | 4.41  | 4.02  | 9.29  |       | 4.58  | 3.39  |
| LP(1) N34       | BD*(1) C36 - N50 |       |       | 4.98  | 3.56  |       | 0.61  | 4.75  | 3.80  |
| LP(1) N34       | BD*(2) C5 - C15  |       |       | 87.70 | 87.92 |       |       | 88.15 | 87.48 |
| LP(1) N50       | BD*(1) C15 - N34 | 2.11  | 2.05  | 9.31  | 1.09  | 4.51  |       | 9.23  | 1.07  |
| LP(1) N50       | BD*(2) C15 - N34 | 28.67 | 29.16 |       |       | 17.76 | 0.68  |       |       |
| LP(1) N50       | BD*(1) C35 - H38 | 8.55  | 8.53  | 8.44  | 7.50  | 8.80  | 7.27  | 8.27  | 7.44  |
| LP(1) N50       | BD*(1) C36 - H41 | 7.91  | 7.94  | 8.48  | 7.52  | 7.80  | 7.13  | 8.44  | 7.41  |
| LP(1) N50       | BD*(1) N34 - H28 |       |       | 3.96  | 8.88  |       |       | 3.88  | 8.70  |
| LP(1) O32       | BD*(1) C8 - C9   | 6.22  | 6.20  | 6.20  | 6.33  | 6.18  | 6.47  | 6.23  | 6.40  |
| LP(1) O32       | BD*(1) C15 - H16 | 2.20  | 2.76  | 2.41  | 1.81  | 2.78  | 0.94  | 2.48  | 0.97  |
| LP(2) O32       | BD*(2) C8 - C9   | 33.55 | 33.33 | 31.65 | 32.35 | 33.02 | 34.09 | 31.81 | 32.39 |
| BD(1) O32 - H33 | BD*(1) C4 - C8   | 5.21  | 5.20  | 5.00  | 5.04  | 5.15  | 5.18  | 5.00  | 5.02  |
| BD(2) C58 - C59 | BD*(1) O32 - H33 | 1.21  | 1.14  | 0.98  | 0.96  | 1.21  | 0.96  | 0.96  | 0.86  |

<sup>a</sup>At the M06-2X/6-311G(d,p) level in gas phase. <sup>b</sup>In kcal/mol.

**Table S16** NBO data of **13/16** and **14/17**.<sup>a,b,c</sup>

| Donor           | Aceptor          | 13cc  | 13aa  | 16dd  | 16bb  | 14aa  | 14bb  | 17dd  | 17bb  |
|-----------------|------------------|-------|-------|-------|-------|-------|-------|-------|-------|
| LP(1) O25       | BD*(1) C1 - C6   | 6.69  | 6.71  | 6.22  | 6.20  | 6.72  | 6.79  | 6.25  | 6.18  |
| LP(2) O25       | BD*(1) C1 - C2   | 34.50 | 34.58 | 38.06 | 37.87 | 34.76 | 34.63 | 38.15 | 37.83 |
| LP(1) O27       | BD*(1) C5 - C6   | 8.25  | 8.28  | 2.83  | 3.04  | 8.42  | 8.52  | 2.95  | 3.06  |
| LP(1) O27       | BD*(1) O25 - H26 | 2.58  | 2.61  | 0.96  | 1.07  | 2.49  | 2.31  | 1.02  | 1.05  |
| LP(1) O27       | BD*(1) N34 - H28 |       |       | 3.16  | 3.91  |       |       | 3.46  | 3.77  |
| LP(2) O27       | BD*(1) C1 - C6   |       |       | 18.19 | 18.10 |       |       | 18.18 | 18.16 |
| LP(2) O27       | BD*(2) C5 - C6   | 41.41 | 41.53 | 16.23 | 15.70 | 43.23 | 44.50 | 16.02 | 15.66 |
| LP(2) O27       | BD*(1) O25 - H26 |       |       | 5.61  | 5.67  |       |       | 5.64  | 5.62  |
| LP(2) O27       | BD*(1) N34 - H28 |       |       | 5.91  | 6.97  |       |       | 6.50  | 6.95  |
| LP(1) N34       | BD*(1) C15 - H16 | 9.70  | 9.49  |       |       | 9.64  | 7.98  |       |       |
| LP(1) N34       | BD*(1) O27 - H28 | 41.90 | 42.97 |       |       |       |       |       |       |
| LP(1) N34       | BD*(1) C35 - N50 | 10.12 | 10.20 |       |       | 9.20  | 0.62  |       |       |
| LP(1) N34       | BD*(2) C5 - C15  |       |       |       |       |       |       |       |       |
| LP(1) N50       | BD*(1) C15 - N34 | 2.09  | 2.09  | 9.34  | 0.99  | 4.56  |       | 9.26  | 0.94  |
| LP(1) N50       | BD*(2) C15 - N34 | 30.17 | 30.55 |       |       | 18.42 | 0.86  |       |       |
| LP(1) N50       | BD*(1) C35 - H38 | 8.07  | 7.05  | 8.00  | 7.07  | 8.30  | 6.96  | 7.88  | 7.01  |
| LP(1) N50       | BD*(1) C36 - H41 | 7.51  | 7.53  | 8.05  | 7.07  | 7.43  | 6.82  | 8.02  | 6.95  |
| LP(1) N50       | BD*(1) N34 - H28 |       |       | 3.86  | 8.70  |       |       | 3.79  | 8.66  |
| LP(1) O32       | BD*(1) C8 - C9   | 6.51  | 6.44  | 6.43  | 6.51  | 6.39  | 6.64  | 6.42  | 6.58  |
| LP(1) O32       | BD*(1) C15 - H16 | 1.43  | 2.17  | 2.09  | 1.70  | 2.72  | 0.83  | 2.35  | 0.81  |
| LP(2) O32       | BD*(2) C8 - C9   | 34.59 | 34.16 | 32.42 | 32.90 | 33.64 | 34.51 | 32.43 | 32.89 |
| BD(1) O32 - H33 | BD*(1) C4 - C8   | 5.23  | 5.19  | 5.00  | 5.04  | 5.13  | 5.17  | 5.00  | 5.00  |
| BD(2) C58 - C59 | BD*(1) O32 - H33 | 1.06  | 0.92  | 0.81  | 0.80  | 0.91  | 0.69  | 0.74  | 0.66  |

<sup>a</sup>At the M06-2X/6-311G(d,p) level. <sup>b</sup>Including the solvent effect (SMD model, CHCl<sub>3</sub> as solvent). <sup>c</sup>In kcal/mol.

**Table S17** NBO data of **13/16** and **14/17**.<sup>a,b,c</sup>

| Donor           | Aceptor          | 13cc  | 13aa  | 16dd  | 16bb  | 14aa  | 14bb  | 17dd  | 17bb  |
|-----------------|------------------|-------|-------|-------|-------|-------|-------|-------|-------|
| LP(1) O25       | BD*(1) C1 - C6   | 6.66  | 6.67  | 6.15  | 6.14  | 6.67  | 6.72  | 6.17  | 6.11  |
| LP(2) O25       | BD*(1) C1 - C2   | 34.62 | 34.70 | 38.19 | 38.14 | 34.79 | 34.75 | 38.22 | 38.10 |
| LP(1) O27       | BD*(1) C5 - C6   | 8.28  | 8.31  | 2.73  | 2.84  | 8.42  | 8.54  | 2.84  | 2.84  |
| LP(1) O27       | BD*(1) O25 - H26 | 2.70  | 2.81  | 1.08  | 1.14  | 2.69  | 2.45  | 1.12  | 1.10  |
| LP(1) O27       | BD*(1) N34 - H28 |       |       | 3.19  | 3.71  |       |       | 3.45  | 3.51  |
| LP(2) O27       | BD*(1) C1 - C6   |       |       | 18.00 | 18.01 |       |       | 18.03 | 18.12 |
| LP(2) O27       | BD*(2) C5 - C6   | 41.66 | 41.95 | 16.28 | 16.03 | 43.60 | 45.08 | 16.09 | 16.04 |
| LP(2) O27       | BD*(1) O25 - H26 |       |       | 6.32  | 6.36  |       |       | 6.27  | 6.25  |
| LP(2) O27       | BD*(1) N34 - H28 |       |       | 5.79  | 6.21  |       |       | 6.31  | 6.10  |
| LP(1) N34       | BD*(1) C15 - H16 | 9.68  | 9.45  |       |       | 9.61  | 8.02  |       |       |
| LP(1) N34       | BD*(1) O27 - H28 | 43.00 | 45.11 |       |       | 55.35 |       |       |       |
| LP(1) N34       | BD*(1) C35 - N50 | 10.07 | 10.11 |       |       | 9.07  |       |       |       |
| LP(1) N34       | BD*(1) C36 - N50 |       |       |       |       |       |       |       |       |
| LP(1) N34       | BD*(2) C5 - C15  |       |       |       |       |       |       |       |       |
| LP(1) N50       | BD*(1) C15 - N34 | 2.12  | 2.12  | 9.43  | 0.94  | 4.63  |       | 9.30  | 0.90  |
| LP(1) N50       | BD*(2) C15 - N34 | 30.72 | 30.98 |       |       | 18.19 |       |       |       |
| LP(1) N50       | BD*(1) C35 - H38 | 7.83  | 7.82  | 7.80  | 6.83  | 8.06  | 6.81  | 7.68  | 6.80  |
| LP(1) N50       | BD*(1) C36 - H41 | 7.31  | 7.32  | 7.87  | 6.86  | 7.22  | 6.74  | 7.81  | 6.75  |
| LP(1) N50       | BD*(1) N34 - H28 |       |       | 3.86  | 8.59  |       |       | 3.76  | 8.58  |
| LP(1) O32       | BD*(1) C8 - C9   | 6.57  | 6.48  | 6.48  | 6.52  | 6.42  | 6.73  | 6.48  | 6.60  |
| LP(1) O32       | BD*(1) C15 - H16 | 1.23  | 1.97  | 1.95  | 1.53  | 2.44  | 0.52  | 2.15  | 0.73  |
| LP(2) O32       | BD*(2) C8 - C9   | 35.02 | 34.79 | 33.07 | 33.29 | 34.23 | 34.96 | 33.10 | 33.33 |
| BD(1) O32 - H33 | BD*(1) C4 - C8   | 5.29  | 5.27  | 5.09  | 5.12  | 5.22  | 5.20  | 5.07  | 5.08  |
| BD(2) C58 - C59 | BD*(1) O32 - H33 | 1.13  | 1.02  | 0.85  | 0.87  | 1.04  | 0.69  | 0.80  | 0.72  |

<sup>a</sup>At the M06-2X/6-311G(d,p) level. <sup>b</sup>Including the solvent effect (SMD model, DMSO as solvent). <sup>c</sup>In kcal/mol.



**Table S18** Geometry (Å and °) and energy (kcal/mol) data for intramolecular hydrogen bonds in compounds **13/16** and **14/17**.<sup>a</sup>

|             |                   | D-H...A | d(D-H) | d(H...A) | d(D...A) | ∠(DHA)  | E <sub>HB</sub> <sup>b</sup> |
|-------------|-------------------|---------|--------|----------|----------|---------|------------------------------|
| <b>16dd</b> | Vacuum            | N-H...O | 1.017  | 1.849    | 2.596    | 127.359 | -12.6                        |
|             | CHCl <sub>3</sub> | N-H...O | 1.017  | 1.865    | 2.606    | 126.918 | -12.1                        |
|             | DMSO              | N-H...O | 1.017  | 1.866    | 2.609    | 127.161 | -11.9                        |
| <b>16bb</b> | Vacuum            | N-H...O | 1.025  | 1.815    | 2.583    | 128.702 | -13.3                        |
|             | CHCl <sub>3</sub> | N-H...O | 1.024  | 1.847    | 2.599    | 127.362 | -12.4                        |
|             | DMSO              | N-H...O | 1.024  | 1.864    | 2.608    | 126.636 | -12.0                        |
| <b>17dd</b> | Vacuum            | N-H...O | 1.017  | 1.832    | 2.586    | 128.065 | -13.1                        |
|             | CHCl <sub>3</sub> | N-H...O | 1.017  | 1.843    | 2.594    | 127.837 | -12.7                        |
|             | DMSO              | N-H...O | 1.017  | 1.846    | 2.599    | 127.943 | -12.5                        |
| <b>17bb</b> | Vacuum            | N-H...O | 1.026  | 1.820    | 2.588    | 128.613 | -13.0                        |
|             | CHCl <sub>3</sub> | N-H...O | 1.024  | 1.855    | 2.606    | 127.255 | -12.1                        |
|             | DMSO              | N-H...O | 1.024  | 1.876    | 2.618    | 126.463 | -11.5                        |

<sup>a</sup>At the M06-2X/6-311G(d,p) level. <sup>b</sup>Estimated as described in Ref.1 .

1 R. N. Musin and Y. H. Mariam, *J. Phys. Org. Chem.*, 2006, **19**, 425.

**Table S19** Relative stability and conformational data of the most stable conformers for theatropisomeric pathways of (*S*)-**13aa** (angles in degrees and energies in kcal/mol)<sup>a,b</sup>

| Configuration                       | ( <i>S</i> )- <b>13aa</b> | ( <i>S</i> )- <b>13aa</b> <sup>f</sup> | ( <i>R</i> )- <b>13aa</b> | ( <i>R</i> )- <b>13aa</b> <sup>f</sup> | ( <i>R</i> )- <b>13aa</b> <sup>g</sup> |
|-------------------------------------|---------------------------|----------------------------------------|---------------------------|----------------------------------------|----------------------------------------|
|                                     | <i>S</i>                  | <i>S</i>                               | <i>R</i>                  | <i>R</i>                               | <i>R</i>                               |
| χ <sub>C9-C1-O-H</sub> <sup>c</sup> | 175.5                     | 35.4                                   | 180.2                     | 326.7                                  | 184.5                                  |
| θ <sup>c</sup>                      | 13.9                      | 13.8                                   | 13.2                      | 13.9                                   | 346.1                                  |
| φ <sup>c</sup>                      | 103.8                     | 106.5                                  | 259.3                     | 253.0                                  | 256.2                                  |
| ΔE <sub>r</sub> <sup>c</sup>        | 0.00                      | 6.10                                   | 0.35                      | 5.95                                   | 0.00                                   |
| ΔG <sub>r</sub> <sup>c</sup>        | 0.00                      | 3.61                                   | -1.18                     | 3.98                                   | 0.00                                   |
| χ <sub>C9-C1-O-H</sub> <sup>d</sup> | 174.6                     | 35.9                                   | 179.3                     | 325.7                                  | 185.4                                  |
| θ <sup>d</sup>                      | 14.5                      | 13.1                                   | 14.2                      | 14.3                                   | 345.5                                  |
| φ <sup>d</sup>                      | 103.1                     | 104.6                                  | 264.0                     | 254.0                                  | 256.9                                  |
| ΔE <sub>r</sub> <sup>d</sup>        | 0.00                      | 4.38                                   | 0.50                      | 4.32                                   | 0.00                                   |
| ΔG <sub>r</sub> <sup>d</sup>        | 0.00                      | 2.31                                   | -2.05                     | 2.52                                   | 0.00                                   |
| χ <sub>C9-C1-O-H</sub> <sup>e</sup> | 177.1                     | 29.8                                   | 178.4                     | 331.5                                  | 182.9                                  |
| θ <sup>e</sup>                      | 14.4                      | 12.4                                   | 14.3                      | 14.1                                   | 345.6                                  |
| φ <sup>e</sup>                      | 100.4                     | 104.7                                  | 266.5                     | 254.8                                  | 259.6                                  |
| ΔE <sub>r</sub> <sup>e</sup>        | 0.00                      | 3.88                                   | 0.22                      | 3.78                                   | 0.00                                   |
| ΔG <sub>r</sub> <sup>e</sup>        | 0.00                      | 2.83                                   | -2.88                     | 2.49                                   | 0.00                                   |

<sup>a</sup>At the M06-2X/6-311G(d,p) level. <sup>b</sup>Relative energy with respect to that of **13aa**. <sup>c</sup>In the gas phase. <sup>d</sup>Including the solvent effect (SMD model, CHCl<sub>3</sub> as solvent). <sup>e</sup>Including the solvent effect (SMD model, DMSO as solvent). <sup>f</sup>OH rotated ~140°. <sup>g</sup>True enantiomer of (*S*)-**13aa**.

**Cartesian Coordinates and Calculated Energies at the M06-2x/6-311G(d,p) level in Gas Phase, CHCl<sub>3</sub>, and DMSO (SMD Model)**

**Structure 13aa ((S)-13aa) (vacuum)**

Energy (Hartrees): = -2224.3849204  
No imaginary frequencies

Standard orientation:

| Center Number | Atomic Number | Atomic Type | Coordinates (Angstroms) |           |           |
|---------------|---------------|-------------|-------------------------|-----------|-----------|
|               |               |             | X                       | Y         | Z         |
| 1             | 6             | 0           | -5.140635               | 2.545977  | 0.590114  |
| 2             | 6             | 0           | -4.073715               | 2.911759  | 1.367748  |
| 3             | 6             | 0           | -2.922713               | 2.047038  | 1.377163  |
| 4             | 6             | 0           | -2.918321               | 0.828361  | 0.624245  |
| 5             | 6             | 0           | -4.086314               | 0.452619  | -0.138768 |
| 6             | 6             | 0           | -5.153518               | 1.333515  | -0.150127 |
| 7             | 6             | 0           | 4.280764                | -5.432609 | 1.247457  |
| 8             | 6             | 0           | -0.564255               | -2.023249 | 2.979089  |
| 9             | 6             | 0           | -4.156221               | 4.206155  | 2.162747  |
| 10            | 6             | 0           | -1.710858               | 0.066087  | 0.649828  |
| 11            | 6             | 0           | -0.604953               | 0.437668  | 1.394538  |
| 12            | 6             | 0           | -0.636298               | 1.629387  | 2.158993  |
| 13            | 6             | 0           | -1.770144               | 2.396614  | 2.131327  |
| 14            | 6             | 0           | -5.280727               | 4.158623  | 3.207564  |
| 15            | 6             | 0           | -4.280866               | 5.432638  | 1.247305  |
| 16            | 6             | 0           | 0.564218                | 2.023509  | 2.978965  |
| 17            | 6             | 0           | -4.238263               | -0.830753 | -0.843456 |
| 18            | 6             | 0           | 4.238285                | 0.830728  | -0.843460 |
| 19            | 6             | 0           | 0.604937                | -0.437527 | 1.394564  |
| 20            | 6             | 0           | 0.636266                | -1.629200 | 2.159089  |
| 21            | 6             | 0           | 1.770091                | -2.396462 | 2.131445  |
| 22            | 6             | 0           | 2.922656                | -2.046953 | 1.377245  |
| 23            | 6             | 0           | 2.918286                | -0.828308 | 0.624277  |
| 24            | 6             | 0           | 1.710838                | -0.066015 | 0.649810  |
| 25            | 6             | 0           | 4.156088                | -4.206100 | 2.162861  |
| 26            | 6             | 0           | 5.280537                | -4.158549 | 3.207738  |
| 27            | 6             | 0           | 4.073630                | -2.911713 | 1.367840  |
| 28            | 6             | 0           | 5.140566                | -2.545974 | 0.590205  |
| 29            | 6             | 0           | 5.153472                | -1.333534 | -0.150069 |
| 30            | 6             | 0           | 4.086291                | -0.452618 | -0.138742 |
| 31            | 1             | 0           | 3.468851                | 1.572405  | -0.713678 |
| 32            | 1             | 0           | 1.767489                | -3.304110 | 2.715023  |
| 33            | 1             | 0           | -3.468847               | -1.572419 | -0.713576 |
| 34            | 1             | 0           | -1.767554               | 3.304295  | 2.714851  |
| 35            | 1             | 0           | 6.869165                | -2.853898 | -0.081136 |
| 36            | 1             | 0           | 4.262825                | -6.345888 | 1.847922  |
| 37            | 1             | 0           | -3.231015               | 4.333712  | 2.719409  |
| 38            | 8             | 0           | 1.637893                | 1.079510  | -0.088708 |
| 39            | 1             | 0           | -5.268159               | 5.072745  | 3.806919  |
| 40            | 1             | 0           | -5.145916               | 3.308410  | 3.879927  |
| 41            | 1             | 0           | -6.256990               | 4.072414  | 2.731780  |
| 42            | 1             | 0           | -4.263009               | 6.345934  | 1.847747  |
| 43            | 1             | 0           | -3.448474               | 5.471830  | 0.541010  |
| 44            | 1             | 0           | -5.212586               | 5.409268  | 0.683272  |
| 45            | 1             | 0           | -0.853327               | -1.216826 | 3.657943  |
| 46            | 1             | 0           | -0.352749               | -2.917063 | 3.566100  |
| 47            | 1             | 0           | -1.428467               | -2.225193 | 2.339407  |
| 48            | 8             | 0           | -6.255617               | 3.314343  | 0.506873  |
| 49            | 1             | 0           | -6.869233               | 2.853854  | -0.081250 |
| 50            | 8             | 0           | -6.296684               | 1.131280  | -0.828200 |
| 51            | 1             | 0           | -6.190466               | 0.270885  | -1.326479 |
| 52            | 1             | 0           | 0.352710                | 2.917381  | 3.565887  |
| 53            | 1             | 0           | 1.428437                | 2.225389  | 2.339275  |
| 54            | 1             | 0           | 0.853280                | 1.217152  | 3.657902  |
| 55            | 8             | 0           | -1.637905               | -1.079504 | -0.088585 |
| 56            | 8             | 0           | 6.296637                | -1.131332 | -0.828161 |
| 57            | 1             | 0           | 3.448424                | -5.471789 | 0.541099  |
| 58            | 1             | 0           | 5.212527                | -5.409291 | 0.683495  |
| 59            | 8             | 0           | 6.255535                | -3.314363 | 0.506989  |
| 60            | 1             | 0           | 3.230847                | -4.333646 | 2.719469  |
| 61            | 1             | 0           | 5.267947                | -5.072662 | 3.807107  |
| 62            | 1             | 0           | 5.145684                | -3.308326 | 3.880082  |
| 63            | 1             | 0           | 6.256823                | -4.072340 | 2.732003  |
| 64            | 1             | 0           | 6.190438                | -0.270961 | -1.326454 |
| 65            | 1             | 0           | -0.737934               | -1.425063 | -0.012599 |
| 66            | 1             | 0           | 0.737927                | 1.425088  | -0.012745 |
| 67            | 7             | 0           | -5.271787               | -1.046410 | -1.578356 |
| 68            | 6             | 0           | -4.577158               | -3.333120 | -1.965027 |
| 69            | 6             | 0           | -6.867264               | -2.534309 | -2.351055 |
| 70            | 6             | 0           | -4.816935               | -4.487831 | -2.934513 |
| 71            | 1             | 0           | -4.744587               | -3.655582 | -0.921534 |
| 72            | 1             | 0           | -3.537386               | -3.012330 | -2.051398 |
| 73            | 6             | 0           | -7.125870               | -3.651109 | -3.351612 |

|     |   |   |           |           |           |
|-----|---|---|-----------|-----------|-----------|
| 74  | 1 | 0 | -7.226351 | -2.836120 | -1.352652 |
| 75  | 1 | 0 | -7.394600 | -1.622198 | -2.633890 |
| 76  | 6 | 0 | -6.291097 | -4.879053 | -2.995243 |
| 77  | 1 | 0 | -4.197629 | -5.334713 | -2.629981 |
| 78  | 1 | 0 | -4.483162 | -4.178089 | -3.929544 |
| 79  | 1 | 0 | -8.192452 | -3.887462 | -3.356009 |
| 80  | 1 | 0 | -6.857261 | -3.300440 | -4.352862 |
| 81  | 1 | 0 | -6.444010 | -5.678146 | -3.723900 |
| 82  | 1 | 0 | -6.610277 | -5.263935 | -2.019499 |
| 83  | 7 | 0 | -5.441772 | -2.204508 | -2.289061 |
| 84  | 7 | 0 | 5.271836  | 1.046321  | -1.578328 |
| 85  | 7 | 0 | 5.441898  | 2.204382  | -2.289068 |
| 86  | 6 | 0 | 4.577252  | 3.333000  | -1.965164 |
| 87  | 6 | 0 | 6.867393  | 2.534168  | -2.350953 |
| 88  | 6 | 0 | 4.817121  | 4.487686  | -2.934657 |
| 89  | 1 | 0 | 4.744563  | 3.655503  | -0.921663 |
| 90  | 1 | 0 | 3.537486  | 3.012208  | -2.051629 |
| 91  | 6 | 0 | 7.126087  | 3.650928  | -3.351532 |
| 92  | 1 | 0 | 7.226409  | 2.836015  | -1.352533 |
| 93  | 1 | 0 | 7.394743  | 1.622039  | -2.633708 |
| 94  | 6 | 0 | 6.291294  | 4.878894  | -2.995266 |
| 95  | 1 | 0 | 4.197795  | 5.334580  | -2.630198 |
| 96  | 1 | 0 | 4.483434  | 4.177932  | -3.929712 |
| 97  | 1 | 0 | 8.192669  | 3.887268  | -3.355859 |
| 98  | 1 | 0 | 6.857543  | 3.300227  | -4.352789 |
| 99  | 1 | 0 | 6.444277  | 5.677971  | -3.723925 |
| 100 | 1 | 0 | 6.610392  | 5.263793  | -2.019502 |

### Structure 13aa ((S)-13aa) (CHCl<sub>3</sub>)

Energy (Hartrees): = -2224.4282452  
No imaginary frequencies

Standard orientation:

| Center Number | Atomic Number | Atomic Type | Coordinates (Angstroms) |           |           |
|---------------|---------------|-------------|-------------------------|-----------|-----------|
|               |               |             | X                       | Y         | Z         |
| 1             | 6             | 0           | -5.156420               | -2.526193 | -0.607514 |
| 2             | 6             | 0           | -4.109877               | -2.867708 | -1.424483 |
| 3             | 6             | 0           | -2.946518               | -2.018271 | -1.413580 |
| 4             | 6             | 0           | -2.928310               | -0.814245 | -0.638107 |
| 5             | 6             | 0           | -4.088650               | -0.445043 | 0.141182  |
| 6             | 6             | 0           | -5.154432               | -1.329319 | 0.158961  |
| 7             | 6             | 0           | 4.230686                | 5.390803  | -1.393197 |
| 8             | 6             | 0           | -0.556214               | 2.033755  | -2.972252 |
| 9             | 6             | 0           | -4.211565               | -4.129667 | -2.269321 |
| 10            | 6             | 0           | -1.712006               | -0.063011 | -0.646556 |
| 11            | 6             | 0           | -0.608250               | -0.433778 | -1.394850 |
| 12            | 6             | 0           | -0.646562               | -1.621901 | -2.166779 |
| 13            | 6             | 0           | -1.790603               | -2.376222 | -2.160039 |
| 14            | 6             | 0           | -5.407612               | -4.092369 | -3.232000 |
| 15            | 6             | 0           | -4.230485               | -5.390605 | -1.394698 |
| 16            | 6             | 0           | 0.556592                | -2.033196 | -2.972544 |
| 17            | 6             | 0           | -4.244221               | 0.841362  | 0.843642  |
| 18            | 6             | 0           | 4.244137                | -0.841496 | 0.843996  |
| 19            | 6             | 0           | 0.608435                | 0.434056  | -1.394699 |
| 20            | 6             | 0           | 0.646844                | 1.622312  | -2.166416 |
| 21            | 6             | 0           | 1.790892                | 2.376620  | -2.159422 |
| 22            | 6             | 0           | 2.946726                | 2.018525  | -1.412905 |
| 23            | 6             | 0           | 2.928421                | 0.814366  | -0.637644 |
| 24            | 6             | 0           | 1.712105                | 0.063153  | -0.646344 |
| 25            | 6             | 0           | 4.211883                | 4.130071  | -2.268123 |
| 26            | 6             | 0           | 5.408036                | 4.093027  | -3.230679 |
| 27            | 6             | 0           | 4.110113                | 2.867929  | -1.423569 |
| 28            | 6             | 0           | 5.156572                | 2.526247  | -0.606561 |
| 29            | 6             | 0           | 5.154482                | 1.329252  | 0.159722  |
| 30            | 6             | 0           | 4.088675                | 0.445011  | 0.141703  |
| 31            | 1             | 0           | 3.507106                | -1.608542 | 0.674583  |
| 32            | 1             | 0           | 1.787392                | 3.286095  | -2.741387 |
| 33            | 1             | 0           | -3.507205               | 1.608456  | 0.674389  |
| 34            | 1             | 0           | -1.787031               | -3.285597 | -2.742161 |
| 35            | 1             | 0           | 6.877945                | 2.869993  | 0.094043  |
| 36            | 1             | 0           | 4.238182                | 6.285210  | -2.022500 |
| 37            | 1             | 0           | -3.328593               | -4.195605 | -2.900325 |
| 38            | 8             | 0           | 1.641122                | -1.062082 | 0.116667  |
| 39            | 1             | 0           | -5.371182               | -4.961111 | -3.895320 |
| 40            | 1             | 0           | -5.380164               | -3.193764 | -3.853635 |
| 41            | 1             | 0           | -6.356018               | -4.111608 | -2.696290 |
| 42            | 1             | 0           | -4.237915               | -6.284861 | -2.024216 |
| 43            | 1             | 0           | -3.344958               | -5.433528 | -0.755142 |
| 44            | 1             | 0           | -5.116563               | -5.412826 | -0.758419 |
| 45            | 1             | 0           | -0.850916               | 1.243220  | -3.667820 |
| 46            | 1             | 0           | -0.344793               | 2.938216  | -3.543555 |
| 47            | 1             | 0           | -1.416397               | 2.229554  | -2.324774 |
| 48            | 8             | 0           | -6.262625               | -3.305859 | -0.514428 |

|     |   |   |           |           |           |
|-----|---|---|-----------|-----------|-----------|
| 49  | 1 | 0 | -6.877848 | -2.870110 | 0.092876  |
| 50  | 8 | 0 | -6.283182 | -1.137759 | 0.863527  |
| 51  | 1 | 0 | -6.162766 | -0.283394 | 1.376078  |
| 52  | 1 | 0 | 0.345260  | -2.937592 | -3.543981 |
| 53  | 1 | 0 | 1.416715  | -2.229042 | -2.325000 |
| 54  | 1 | 0 | 0.851335  | -1.242561 | -3.667980 |
| 55  | 8 | 0 | -1.641115 | 1.062087  | 0.116666  |
| 56  | 8 | 0 | 6.283145  | 1.137556  | 0.864388  |
| 57  | 1 | 0 | 3.345083  | 5.433562  | -0.753736 |
| 58  | 1 | 0 | 5.116688  | 5.412879  | -0.756806 |
| 59  | 8 | 0 | 6.262785  | 3.305873  | -0.513231 |
| 60  | 1 | 0 | 3.328983  | 4.196142  | -2.899214 |
| 61  | 1 | 0 | 5.371690  | 4.961962  | -3.893751 |
| 62  | 1 | 0 | 5.380644  | 3.194601  | -3.852575 |
| 63  | 1 | 0 | 6.356385  | 4.112101  | -2.694863 |
| 64  | 1 | 0 | 6.162620  | 0.283138  | 1.376830  |
| 65  | 1 | 0 | -0.739066 | 1.411100  | 0.075952  |
| 66  | 1 | 0 | 0.739064  | -1.411057 | 0.075833  |
| 67  | 7 | 0 | -5.253079 | 1.026591  | 1.620324  |
| 68  | 6 | 0 | -4.652631 | 3.347887  | 1.955836  |
| 69  | 6 | 0 | -6.884294 | 2.440296  | 2.455086  |
| 70  | 6 | 0 | -4.905272 | 4.497138  | 2.927878  |
| 71  | 1 | 0 | -4.889648 | 3.648425  | 0.920473  |
| 72  | 1 | 0 | -3.594806 | 3.082118  | 1.995069  |
| 73  | 6 | 0 | -7.151489 | 3.554630  | 3.455221  |
| 74  | 1 | 0 | -7.297803 | 2.713375  | 1.470547  |
| 75  | 1 | 0 | -7.354099 | 1.507526  | 2.771545  |
| 76  | 6 | 0 | -6.392285 | 4.817068  | 3.054881  |
| 77  | 1 | 0 | -4.342666 | 5.369320  | 2.586618  |
| 78  | 1 | 0 | -4.509476 | 4.214810  | 3.908709  |
| 79  | 1 | 0 | -8.227429 | 3.739139  | 3.499092  |
| 80  | 1 | 0 | -6.827899 | 3.227810  | 4.448862  |
| 81  | 1 | 0 | -6.548653 | 5.611633  | 3.788233  |
| 82  | 1 | 0 | -6.772829 | 5.180504  | 2.092911  |
| 83  | 7 | 0 | -5.445270 | 2.178863  | 2.329832  |
| 84  | 7 | 0 | 5.252924  | -1.026875 | 1.620734  |
| 85  | 7 | 0 | 5.444977  | -2.179253 | 2.330103  |
| 86  | 6 | 0 | 4.652255  | -3.348156 | 1.955911  |
| 87  | 6 | 0 | 6.883969  | -2.440833 | 2.455415  |
| 88  | 6 | 0 | 4.904714  | -4.497539 | 2.927844  |
| 89  | 1 | 0 | 4.889326  | -3.648603 | 0.920534  |
| 90  | 1 | 0 | 3.594453  | -3.082286 | 1.995088  |
| 91  | 6 | 0 | 7.150999  | -3.555315 | 3.455428  |
| 92  | 1 | 0 | 7.297514  | -2.713823 | 1.470866  |
| 93  | 1 | 0 | 7.353839  | -1.508145 | 2.772021  |
| 94  | 6 | 0 | 6.391688  | -4.817630 | 3.054906  |
| 95  | 1 | 0 | 4.342047  | -5.369630 | 2.586448  |
| 96  | 1 | 0 | 4.508879  | -4.215280 | 3.908679  |
| 97  | 1 | 0 | 8.226918  | -3.739941 | 3.499330  |
| 98  | 1 | 0 | 6.827397  | -3.228578 | 4.449093  |
| 99  | 1 | 0 | 6.547933  | -5.612286 | 3.788185  |
| 100 | 1 | 0 | 6.772252  | -5.181008 | 2.092922  |

-----

### Structure 13aa ((S)-13aa) (DMSO)

Energy (Hartrees): = -2224.4174605  
 No imaginary frequencies

Standard orientation:

| Center Number | Atomic Number | Atomic Type | Coordinates (Angstroms) |           |           |
|---------------|---------------|-------------|-------------------------|-----------|-----------|
|               |               |             | X                       | Y         | Z         |
| 1             | 6             | 0           | -5.157727               | -2.507521 | -0.599556 |
| 2             | 6             | 0           | -4.124038               | -2.845967 | -1.434342 |
| 3             | 6             | 0           | -2.957155               | -2.000510 | -1.431760 |
| 4             | 6             | 0           | -2.923017               | -0.804955 | -0.643324 |
| 5             | 6             | 0           | -4.073434               | -0.434094 | 0.149881  |
| 6             | 6             | 0           | -5.142978               | -1.314297 | 0.173362  |
| 7             | 6             | 0           | 4.238697                | 5.367302  | -1.420025 |
| 8             | 6             | 0           | -0.519331               | 2.007465  | -3.047267 |
| 9             | 6             | 0           | -4.238285               | -4.101585 | -2.286448 |
| 10            | 6             | 0           | -1.701183               | -0.062543 | -0.654775 |
| 11            | 6             | 0           | -0.611740               | -0.429078 | -1.425749 |
| 12            | 6             | 0           | -0.668454               | -1.603617 | -2.216522 |
| 13            | 6             | 0           | -1.814975               | -2.354533 | -2.201304 |
| 14            | 6             | 0           | -5.450859               | -4.061243 | -3.227054 |
| 15            | 6             | 0           | -4.238550               | -5.367335 | -1.419681 |
| 16            | 6             | 0           | 0.519319                | -2.007478 | -3.047200 |
| 17            | 6             | 0           | -4.217598               | 0.850325  | 0.859937  |
| 18            | 6             | 0           | 4.217610                | -0.850279 | 0.859841  |
| 19            | 6             | 0           | 0.611744                | 0.429115  | -1.425775 |
| 20            | 6             | 0           | 0.668453                | 1.603624  | -2.216594 |
| 21            | 6             | 0           | 1.814986                | 2.354524  | -2.201435 |
| 22            | 6             | 0           | 2.957182                | 2.000512  | -1.431910 |
| 23            | 6             | 0           | 2.923045                | 0.804991  | -0.643426 |

|     |   |   |           |           |           |
|-----|---|---|-----------|-----------|-----------|
| 24  | 6 | 0 | 1.701203  | 0.062595  | -0.654816 |
| 25  | 6 | 0 | 4.238342  | 4.101514  | -2.286737 |
| 26  | 6 | 0 | 5.450866  | 4.061086  | -3.227403 |
| 27  | 6 | 0 | 4.124088  | 2.845939  | -1.434568 |
| 28  | 6 | 0 | 5.157798  | 2.507496  | -0.599805 |
| 29  | 6 | 0 | 5.143045  | 1.314303  | 0.173161  |
| 30  | 6 | 0 | 4.073476  | 0.434127  | 0.149752  |
| 31  | 1 | 0 | 3.479634  | -1.617170 | 0.691550  |
| 32  | 1 | 0 | 1.823414  | 3.255848  | -2.796037 |
| 33  | 1 | 0 | -3.479671 | 1.617252  | 0.691594  |
| 34  | 1 | 0 | -1.823403 | -3.255883 | -2.795865 |
| 35  | 1 | 0 | 6.866486  | 2.838778  | 0.123498  |
| 36  | 1 | 0 | 4.256061  | 6.257138  | -2.055468 |
| 37  | 1 | 0 | -3.366842 | -4.162949 | -2.933331 |
| 38  | 8 | 0 | 1.609201  | -1.043778 | 0.130790  |
| 39  | 1 | 0 | -5.420637 | -4.923735 | -3.898617 |
| 40  | 1 | 0 | -5.438017 | -3.157434 | -3.842005 |
| 41  | 1 | 0 | -6.390487 | -4.089933 | -2.676239 |
| 42  | 1 | 0 | -4.255910 | -6.257200 | -2.055083 |
| 43  | 1 | 0 | -3.339913 | -5.413470 | -0.798643 |
| 44  | 1 | 0 | -5.112164 | -5.396032 | -0.766282 |
| 45  | 1 | 0 | -0.812873 | 1.202745  | -3.727169 |
| 46  | 1 | 0 | -0.290680 | 2.895488  | -3.637319 |
| 47  | 1 | 0 | -1.385821 | 2.229648  | -2.416803 |
| 48  | 8 | 0 | -6.266818 | -3.281264 | -0.493876 |
| 49  | 1 | 0 | -6.866381 | -2.838824 | 0.123819  |
| 50  | 8 | 0 | -6.263370 | -1.121223 | 0.889049  |
| 51  | 1 | 0 | -6.133737 | -0.263688 | 1.398298  |
| 52  | 1 | 0 | 0.290670  | -2.895529 | -3.637211 |
| 53  | 1 | 0 | 1.385824  | -2.229625 | -2.416743 |
| 54  | 1 | 0 | 0.812840  | -1.202783 | -3.727141 |
| 55  | 8 | 0 | -1.609162 | 1.043852  | 0.130797  |
| 56  | 8 | 0 | 6.263456  | 1.121236  | 0.888821  |
| 57  | 1 | 0 | 3.340092  | 5.413500  | -0.798947 |
| 58  | 1 | 0 | 5.112344  | 5.395994  | -0.766671 |
| 59  | 8 | 0 | 6.266914  | 3.281212  | -0.494193 |
| 60  | 1 | 0 | 3.366870  | 4.162882  | -2.933579 |
| 61  | 1 | 0 | 5.420639  | 4.923547  | -3.899005 |
| 62  | 1 | 0 | 5.437960  | 3.157248  | -3.842311 |
| 63  | 1 | 0 | 6.390524  | 4.089769  | -2.676639 |
| 64  | 1 | 0 | 6.133818  | 0.263731  | 1.398119  |
| 65  | 1 | 0 | -0.715158 | 1.407372  | 0.048990  |
| 66  | 1 | 0 | 0.715193  | -1.407297 | 0.049018  |
| 67  | 7 | 0 | -5.222882 | 1.032240  | 1.642707  |
| 68  | 6 | 0 | -4.623766 | 3.351165  | 1.986145  |
| 69  | 6 | 0 | -6.857476 | 2.438680  | 2.480126  |
| 70  | 6 | 0 | -4.885191 | 4.502117  | 2.953399  |
| 71  | 1 | 0 | -4.857551 | 3.647332  | 0.949447  |
| 72  | 1 | 0 | -3.565441 | 3.088803  | 2.032018  |
| 73  | 6 | 0 | -7.129789 | 3.555896  | 3.475070  |
| 74  | 1 | 0 | -7.266515 | 2.709288  | 1.493624  |
| 75  | 1 | 0 | -7.327043 | 1.506149  | 2.798204  |
| 76  | 6 | 0 | -6.373282 | 4.818320  | 3.071542  |
| 77  | 1 | 0 | -4.323155 | 5.373859  | 2.610406  |
| 78  | 1 | 0 | -4.493388 | 4.226247  | 3.937896  |
| 79  | 1 | 0 | -8.206561 | 3.736274  | 3.513927  |
| 80  | 1 | 0 | -6.809294 | 3.235045  | 4.471850  |
| 81  | 1 | 0 | -6.535203 | 5.616283  | 3.800020  |
| 82  | 1 | 0 | -6.750004 | 5.174664  | 2.105577  |
| 83  | 7 | 0 | -5.415920 | 2.179664  | 2.358054  |
| 84  | 7 | 0 | 5.222905  | -1.032224 | 1.642588  |
| 85  | 7 | 0 | 5.415889  | -2.179624 | 2.357990  |
| 86  | 6 | 0 | 4.623612  | -3.351078 | 1.986199  |
| 87  | 6 | 0 | 6.857431  | -2.438757 | 2.479988  |
| 88  | 6 | 0 | 4.884998  | -4.501997 | 2.953503  |
| 89  | 1 | 0 | 4.857307  | -3.647323 | 0.949503  |
| 90  | 1 | 0 | 3.565313  | -3.088623 | 2.032123  |
| 91  | 6 | 0 | 7.129710  | -3.555940 | 3.474978  |
| 92  | 1 | 0 | 7.266386  | -2.709455 | 1.493475  |
| 93  | 1 | 0 | 7.327099  | -1.506249 | 2.797985  |
| 94  | 6 | 0 | 6.373068  | -4.818322 | 3.071569  |
| 95  | 1 | 0 | 4.322865  | -5.373709 | 2.610595  |
| 96  | 1 | 0 | 4.493282  | -4.226035 | 3.938009  |
| 97  | 1 | 0 | 8.206469  | -3.736410 | 3.513777  |
| 98  | 1 | 0 | 6.809306  | -3.235005 | 4.471760  |
| 99  | 1 | 0 | 6.534966  | -5.616258 | 3.800082  |
| 100 | 1 | 0 | 6.749697  | -5.174753 | 2.105600  |

-----

### Structure (S)-13aa' (vacuum)

Energy (Hartrees): = -2224.3751986  
 No imaginary frequencies

Standard orientation:

-----

| Center | Atomic | Atomic | Coordinates (Angstroms) |
|--------|--------|--------|-------------------------|
|--------|--------|--------|-------------------------|

| Number | Number | Type | X         | Y         | Z         |
|--------|--------|------|-----------|-----------|-----------|
| 1      | 6      | 0    | 4.953019  | -2.918263 | 0.254082  |
| 2      | 6      | 0    | 3.838419  | -3.284867 | 0.960218  |
| 3      | 6      | 0    | 2.755699  | -2.339199 | 1.046667  |
| 4      | 6      | 0    | 2.877595  | -1.035572 | 0.468792  |
| 5      | 6      | 0    | 4.106697  | -0.658396 | -0.190829 |
| 6      | 6      | 0    | 5.095348  | -1.619755 | -0.304005 |
| 7      | 6      | 0    | -3.590590 | 5.758531  | 0.736791  |
| 8      | 6      | 0    | 0.638944  | 1.765012  | 2.956362  |
| 9      | 6      | 0    | 3.782461  | -4.674333 | 1.575722  |
| 10     | 6      | 0    | 1.726126  | -0.195190 | 0.536905  |
| 11     | 6      | 0    | 0.561210  | -0.570504 | 1.175943  |
| 12     | 6      | 0    | 0.463917  | -1.851427 | 1.763583  |
| 13     | 6      | 0    | 1.540475  | -2.694197 | 1.688652  |
| 14     | 6      | 0    | 4.916588  | -4.909941 | 2.584035  |
| 15     | 6      | 0    | 3.749262  | -5.762221 | 0.493067  |
| 16     | 6      | 0    | -0.812632 | -2.275048 | 2.439825  |
| 17     | 6      | 0    | 4.402264  | 0.700249  | -0.670906 |
| 18     | 6      | 0    | -4.412540 | -0.654362 | -0.646459 |
| 19     | 6      | 0    | -0.584480 | 0.383279  | 1.222717  |
| 20     | 6      | 0    | -0.542616 | 1.538274  | 2.049428  |
| 21     | 6      | 0    | -1.565791 | 2.451026  | 1.977725  |
| 22     | 6      | 0    | -2.716314 | 2.255170  | 1.169897  |
| 23     | 6      | 0    | -2.834954 | 1.023035  | 0.461127  |
| 24     | 6      | 0    | -1.696493 | 0.165798  | 0.434872  |
| 25     | 6      | 0    | -3.659747 | 4.607181  | 1.750972  |
| 26     | 6      | 0    | -4.800490 | 4.806286  | 2.758712  |
| 27     | 6      | 0    | -3.745078 | 3.256479  | 1.059214  |
| 28     | 6      | 0    | -4.829929 | 2.978256  | 0.266022  |
| 29     | 6      | 0    | -4.999017 | 1.712869  | -0.359885 |
| 30     | 6      | 0    | -4.053338 | 0.713864  | -0.241381 |
| 31     | 1      | 0    | -3.845352 | -1.466851 | -0.207763 |
| 32     | 1      | 0    | -1.482305 | 3.341562  | 2.583057  |
| 33     | 1      | 0    | 3.700333  | 1.481286  | -0.431616 |
| 34     | 1      | 0    | 1.432255  | -3.675130 | 2.125988  |
| 35     | 1      | 0    | -6.500162 | 3.461995  | -0.462048 |
| 36     | 1      | 0    | -3.445919 | 6.706391  | 1.261337  |
| 37     | 1      | 0    | 2.858377  | -4.765633 | 2.141650  |
| 38     | 8      | 0    | -1.652622 | -0.929368 | -0.391164 |
| 39     | 1      | 0    | 4.780417  | -5.880409 | 3.068772  |
| 40     | 1      | 0    | 4.909320  | -4.138606 | 3.357448  |
| 41     | 1      | 0    | 5.889826  | -4.901810 | 2.095748  |
| 42     | 1      | 0    | 3.645285  | -6.748067 | 0.954276  |
| 43     | 1      | 0    | 2.903687  | -5.607919 | -0.181204 |
| 44     | 1      | 0    | 4.667082  | -5.751137 | -0.095400 |
| 45     | 1      | 0    | 0.819217  | 0.887975  | 3.582567  |
| 46     | 1      | 0    | 0.469464  | 2.628559  | 3.599645  |
| 47     | 1      | 0    | 1.551546  | 1.936016  | 2.378540  |
| 48     | 8      | 0    | 5.995491  | -3.771003 | 0.074786  |
| 49     | 1      | 0    | 6.663713  | -3.290376 | -0.431691 |
| 50     | 8      | 0    | 6.277662  | -1.424046 | -0.916674 |
| 51     | 1      | 0    | 6.265079  | -0.493890 | -1.280158 |
| 52     | 1      | 0    | -1.138360 | -1.532142 | 3.172727  |
| 53     | 1      | 0    | -0.680600 | -3.230639 | 2.948080  |
| 54     | 1      | 0    | -1.615952 | -2.382084 | 1.705278  |
| 55     | 8      | 0    | 1.776339  | 1.033305  | -0.067704 |
| 56     | 8      | 0    | -6.171481 | 1.572397  | -1.007926 |
| 57     | 1      | 0    | -2.753424 | 5.617477  | 0.049512  |
| 58     | 1      | 0    | -4.509423 | 5.823222  | 0.154570  |
| 59     | 8      | 0    | -5.826974 | 3.882293  | 0.088593  |
| 60     | 1      | 0    | -2.732577 | 4.644155  | 2.318916  |
| 61     | 1      | 0    | -4.662744 | 5.750232  | 3.292124  |
| 62     | 1      | 0    | -4.813509 | 3.997348  | 3.492449  |
| 63     | 1      | 0    | -5.766216 | 4.833225  | 2.254732  |
| 64     | 1      | 0    | -6.176765 | 0.672354  | -1.416497 |
| 65     | 1      | 0    | 0.888289  | 1.411015  | -0.045793 |
| 66     | 1      | 0    | -2.107176 | -0.719027 | -1.213279 |
| 67     | 7      | 0    | 5.476050  | 0.932925  | -1.339609 |
| 68     | 6      | 0    | 5.013624  | 3.308835  | -1.334670 |
| 69     | 6      | 0    | 7.231905  | 2.367285  | -1.796894 |
| 70     | 6      | 0    | 5.401686  | 4.588046  | -2.072040 |
| 71     | 1      | 0    | 5.165694  | 3.423517  | -0.246033 |
| 72     | 1      | 0    | 3.953003  | 3.113031  | -1.503298 |
| 73     | 6      | 0    | 7.639608  | 3.612977  | -2.569767 |
| 74     | 1      | 0    | 7.572617  | 2.448104  | -0.750639 |
| 75     | 1      | 0    | 7.683909  | 1.472093  | -2.226311 |
| 76     | 6      | 0    | 6.907191  | 4.834856  | -2.020738 |
| 77     | 1      | 0    | 4.851755  | 5.424404  | -1.633921 |
| 78     | 1      | 0    | 5.084197  | 4.496440  | -3.115277 |
| 79     | 1      | 0    | 8.722643  | 3.738878  | -2.499747 |
| 80     | 1      | 0    | 7.387727  | 3.474283  | -3.625804 |
| 81     | 1      | 0    | 7.167374  | 5.731994  | -2.586899 |
| 82     | 1      | 0    | 7.215088  | 5.005974  | -0.982306 |
| 83     | 7      | 0    | 5.780781  | 2.175363  | -1.835720 |
| 84     | 7      | 0    | -5.407681 | -0.860466 | -1.434530 |
| 85     | 7      | 0    | -5.788017 | -2.108227 | -1.831844 |
| 86     | 6      | 0    | -5.226684 | -3.254517 | -1.126628 |

|     |   |   |           |           |           |
|-----|---|---|-----------|-----------|-----------|
| 87  | 6 | 0 | -7.240715 | -2.149687 | -2.016508 |
| 88  | 6 | 0 | -5.651602 | -4.559884 | -1.794254 |
| 89  | 1 | 0 | -5.534329 | -3.236790 | -0.065894 |
| 90  | 1 | 0 | -4.137291 | -3.185122 | -1.157968 |
| 91  | 6 | 0 | -7.666966 | -3.427944 | -2.722779 |
| 92  | 1 | 0 | -7.742818 | -2.078014 | -1.037306 |
| 93  | 1 | 0 | -7.512402 | -1.267884 | -2.598479 |
| 94  | 6 | 0 | -7.167003 | -4.647562 | -1.952072 |
| 95  | 1 | 0 | -5.268260 | -5.394020 | -1.202397 |
| 96  | 1 | 0 | -5.180844 | -4.614275 | -2.780611 |
| 97  | 1 | 0 | -8.755469 | -3.438168 | -2.813712 |
| 98  | 1 | 0 | -7.248587 | -3.432930 | -3.734064 |
| 99  | 1 | 0 | -7.443694 | -5.571051 | -2.464909 |
| 100 | 1 | 0 | -7.639326 | -4.671945 | -0.962849 |

-----

### Structure (S)-13aa' (CHCl<sub>3</sub>)

Energy (Hartrees): = -2224.4212726  
 No imaginary frequencies

Standard orientation:

| Center<br>Number | Atomic<br>Number | Atomic<br>Type | Coordinates (Angstroms) |           |           |
|------------------|------------------|----------------|-------------------------|-----------|-----------|
|                  |                  |                | X                       | Y         | Z         |
| 1                | 6                | 0              | 4.919871                | -2.932419 | 0.225127  |
| 2                | 6                | 0              | 3.817199                | -3.286842 | 0.959216  |
| 3                | 6                | 0              | 2.752648                | -2.323598 | 1.083536  |
| 4                | 6                | 0              | 2.866086                | -1.032768 | 0.476109  |
| 5                | 6                | 0              | 4.082487                | -0.667961 | -0.211729 |
| 6                | 6                | 0              | 5.061536                | -1.637591 | -0.342854 |
| 7                | 6                | 0              | -3.585954               | 5.760016  | 0.679080  |
| 8                | 6                | 0              | 0.667558                | 1.890532  | 2.898580  |
| 9                | 6                | 0              | 3.757460                | -4.676095 | 1.577258  |
| 10               | 6                | 0              | 1.714236                | -0.189505 | 0.533824  |
| 11               | 6                | 0              | 0.570412                | -0.533245 | 1.226932  |
| 12               | 6                | 0              | 0.497279                | -1.785599 | 1.880738  |
| 13               | 6                | 0              | 1.563783                | -2.642486 | 1.793932  |
| 14               | 6                | 0              | 4.875391                | -4.893792 | 2.606213  |
| 15               | 6                | 0              | 3.746988                | -5.776359 | 0.506954  |
| 16               | 6                | 0              | -0.744498               | -2.166308 | 2.640747  |
| 17               | 6                | 0              | 4.389769                | 0.697707  | -0.669186 |
| 18               | 6                | 0              | -4.407224               | -0.684160 | -0.616019 |
| 19               | 6                | 0              | -0.579754               | 0.418172  | 1.254612  |
| 20               | 6                | 0              | -0.531013               | 1.606167  | 2.032684  |
| 21               | 6                | 0              | -1.564946               | 2.505740  | 1.944804  |
| 22               | 6                | 0              | -2.725622               | 2.269714  | 1.161119  |
| 23               | 6                | 0              | -2.840035               | 1.017412  | 0.483721  |
| 24               | 6                | 0              | -1.695305               | 0.164685  | 0.480285  |
| 25               | 6                | 0              | -3.688819               | 4.624258  | 1.706373  |
| 26               | 6                | 0              | -4.851510               | 4.845354  | 2.683430  |
| 27               | 6                | 0              | -3.761138               | 3.263131  | 1.031370  |
| 28               | 6                | 0              | -4.839871               | 2.964852  | 0.235995  |
| 29               | 6                | 0              | -5.001321               | 1.686027  | -0.365206 |
| 30               | 6                | 0              | -4.055221               | 0.689817  | -0.217642 |
| 31               | 1                | 0              | -3.851185               | -1.498473 | -0.166945 |
| 32               | 1                | 0              | -1.473808               | 3.422828  | 2.508250  |
| 33               | 1                | 0              | 3.724682                | 1.492805  | -0.373383 |
| 34               | 1                | 0              | 1.469386                | -3.600565 | 2.283062  |
| 35               | 1                | 0              | -6.507940               | 3.446614  | -0.521436 |
| 36               | 1                | 0              | -3.452201               | 6.716104  | 1.192513  |
| 37               | 1                | 0              | 2.821718                | -4.772803 | 2.121825  |
| 38               | 8                | 0              | -1.643202               | -0.958963 | -0.300113 |
| 39               | 1                | 0              | 4.754710                | -5.869849 | 3.084716  |
| 40               | 1                | 0              | 4.837324                | -4.128513 | 3.385766  |
| 41               | 1                | 0              | 5.859550                | -4.860484 | 2.138498  |
| 42               | 1                | 0              | 3.618567                | -6.754102 | 0.979819  |
| 43               | 1                | 0              | 2.920708                | -5.627807 | -0.192871 |
| 44               | 1                | 0              | 4.678517                | -5.789609 | -0.059537 |
| 45               | 1                | 0              | 0.833671                | 1.083214  | 3.616755  |
| 46               | 1                | 0              | 0.530192                | 2.821784  | 3.449053  |
| 47               | 1                | 0              | 1.577632                | 1.978011  | 2.297906  |
| 48               | 8                | 0              | 5.951583                | -3.795927 | 0.036464  |
| 49               | 1                | 0              | 6.622041                | -3.338545 | -0.490808 |
| 50               | 8                | 0              | 6.232790                | -1.446788 | -0.977228 |
| 51               | 1                | 0              | 6.215540                | -0.514056 | -1.342481 |
| 52               | 1                | 0              | -0.991889               | -1.414423 | 3.395370  |
| 53               | 1                | 0              | -0.610958               | -3.126153 | 3.141402  |
| 54               | 1                | 0              | -1.602654               | -2.246728 | 1.967335  |
| 55               | 8                | 0              | 1.752000                | 0.996425  | -0.142174 |
| 56               | 8                | 0              | -6.165092               | 1.530290  | -1.023183 |
| 57               | 1                | 0              | -2.728878               | 5.607621  | 0.018153  |
| 58               | 1                | 0              | -4.486518               | 5.822729  | 0.067200  |
| 59               | 8                | 0              | -5.833755               | 3.865856  | 0.031875  |
| 60               | 1                | 0              | -2.779791               | 4.664794  | 2.302011  |
| 61               | 1                | 0              | -4.715026               | 5.793026  | 3.211645  |

|     |   |   |           |           |           |
|-----|---|---|-----------|-----------|-----------|
| 62  | 1 | 0 | -4.889676 | 4.045966  | 3.427718  |
| 63  | 1 | 0 | -5.808624 | 4.879147  | 2.162910  |
| 64  | 1 | 0 | -6.159870 | 0.619467  | -1.419369 |
| 65  | 1 | 0 | 0.867530  | 1.387442  | -0.129380 |
| 66  | 1 | 0 | -2.094821 | -0.795497 | -1.137211 |
| 67  | 7 | 0 | 5.442018  | 0.915791  | -1.375941 |
| 68  | 6 | 0 | 5.076192  | 3.306366  | -1.280597 |
| 69  | 6 | 0 | 7.237878  | 2.291608  | -1.861935 |
| 70  | 6 | 0 | 5.485470  | 4.589642  | -1.997856 |
| 71  | 1 | 0 | 5.283965  | 3.378659  | -0.198816 |
| 72  | 1 | 0 | 4.002062  | 3.159910  | -1.408262 |
| 73  | 6 | 0 | 7.663029  | 3.544198  | -2.612934 |
| 74  | 1 | 0 | 7.615184  | 2.329423  | -0.826801 |
| 75  | 1 | 0 | 7.639652  | 1.393627  | -2.334317 |
| 76  | 6 | 0 | 7.000023  | 4.776892  | -2.002767 |
| 77  | 1 | 0 | 4.986575  | 5.431450  | -1.511740 |
| 78  | 1 | 0 | 5.121432  | 4.542538  | -3.029123 |
| 79  | 1 | 0 | 8.752124  | 3.624830  | -2.578281 |
| 80  | 1 | 0 | 7.369082  | 3.448188  | -3.663236 |
| 81  | 1 | 0 | 7.270599  | 5.677356  | -2.559070 |
| 82  | 1 | 0 | 7.356671  | 4.908936  | -0.974497 |
| 83  | 7 | 0 | 5.776305  | 2.156798  | -1.848337 |
| 84  | 7 | 0 | -5.393633 | -0.885447 | -1.416791 |
| 85  | 7 | 0 | -5.780687 | -2.123953 | -1.825773 |
| 86  | 6 | 0 | -5.240988 | -3.282004 | -1.117661 |
| 87  | 6 | 0 | -7.233571 | -2.148887 | -2.033441 |
| 88  | 6 | 0 | -5.669696 | -4.577350 | -1.801124 |
| 89  | 1 | 0 | -5.568670 | -3.264839 | -0.064104 |
| 90  | 1 | 0 | -4.150898 | -3.222740 | -1.130964 |
| 91  | 6 | 0 | -7.660275 | -3.418947 | -2.752842 |
| 92  | 1 | 0 | -7.745934 | -2.078529 | -1.060389 |
| 93  | 1 | 0 | -7.488906 | -1.261635 | -2.615034 |
| 94  | 6 | 0 | -7.183150 | -4.648348 | -1.983370 |
| 95  | 1 | 0 | -5.305003 | -5.417557 | -1.205856 |
| 96  | 1 | 0 | -5.183131 | -4.632816 | -2.780285 |
| 97  | 1 | 0 | -8.747783 | -3.416311 | -2.857254 |
| 98  | 1 | 0 | -7.229303 | -3.422361 | -3.759366 |
| 99  | 1 | 0 | -7.459439 | -5.564891 | -2.509502 |
| 100 | 1 | 0 | -7.671128 | -4.674798 | -1.001696 |

### Structure (S)-13aa' (DMSO)

Energy (Hartrees): = -2224.4112781

No imaginary frequencies

Standard orientation:

| Center<br>Number | Atomic<br>Number | Atomic<br>Type | Coordinates (Angstroms) |           |           |
|------------------|------------------|----------------|-------------------------|-----------|-----------|
|                  |                  |                | X                       | Y         | Z         |
| 1                | 6                | 0              | 4.920148                | -2.950901 | 0.229374  |
| 2                | 6                | 0              | 3.800035                | -3.306728 | 0.936627  |
| 3                | 6                | 0              | 2.734806                | -2.341280 | 1.040852  |
| 4                | 6                | 0              | 2.861423                | -1.051143 | 0.433711  |
| 5                | 6                | 0              | 4.091681                | -0.686330 | -0.228990 |
| 6                | 6                | 0              | 5.073918                | -1.656068 | -0.337150 |
| 7                | 6                | 0              | -3.650795               | 5.798526  | 0.601460  |
| 8                | 6                | 0              | 0.667890                | 1.857645  | 2.863448  |
| 9                | 6                | 0              | 3.724307                | -4.694370 | 1.555792  |
| 10               | 6                | 0              | 1.711662                | -0.203423 | 0.472555  |
| 11               | 6                | 0              | 0.561822                | -0.537725 | 1.160390  |
| 12               | 6                | 0              | 0.477147                | -1.786662 | 1.819659  |
| 13               | 6                | 0              | 1.536993                | -2.653720 | 1.740241  |
| 14               | 6                | 0              | 4.803647                | -4.898694 | 2.627067  |
| 15               | 6                | 0              | 3.763430                | -5.801229 | 0.493480  |
| 16               | 6                | 0              | -0.768055               | -2.150270 | 2.581467  |
| 17               | 6                | 0              | 4.413363                | 0.681308  | -0.673074 |
| 18               | 6                | 0              | -4.435856               | -0.664663 | -0.619824 |
| 19               | 6                | 0              | -0.579391               | 0.423795  | 1.186382  |
| 20               | 6                | 0              | -0.523045               | 1.601912  | 1.978980  |
| 21               | 6                | 0              | -1.545902               | 2.514250  | 1.894687  |
| 22               | 6                | 0              | -2.707257               | 2.292407  | 1.107161  |
| 23               | 6                | 0              | -2.838576               | 1.040556  | 0.431516  |
| 24               | 6                | 0              | -1.695738               | 0.184428  | 0.408592  |
| 25               | 6                | 0              | -3.630102               | 4.665057  | 1.636448  |
| 26               | 6                | 0              | -4.703559               | 4.863319  | 2.714348  |
| 27               | 6                | 0              | -3.736111               | 3.293584  | 0.987590  |
| 28               | 6                | 0              | -4.847083               | 2.985245  | 0.241642  |
| 29               | 6                | 0              | -5.027489               | 1.703394  | -0.347927 |
| 30               | 6                | 0              | -4.072563               | 0.710681  | -0.234810 |
| 31               | 1                | 0              | -3.869529               | -1.482200 | -0.188712 |
| 32               | 1                | 0              | -1.452607               | 3.421892  | 2.473351  |
| 33               | 1                | 0              | 3.754164                | 1.482485  | -0.379088 |
| 34               | 1                | 0              | 1.432791                | -3.609024 | 2.233324  |
| 35               | 1                | 0              | -6.546095               | 3.443293  | -0.445053 |
| 36               | 1                | 0              | -3.471152               | 6.754300  | 1.101193  |



|     |   |   |           |           |           |
|-----|---|---|-----------|-----------|-----------|
| 37  | 1 | 0 | 2.768385  | -4.797029 | 2.062520  |
| 38  | 8 | 0 | -1.644144 | -0.922635 | -0.390565 |
| 39  | 1 | 0 | 4.675349  | -5.875677 | 3.101436  |
| 40  | 1 | 0 | 4.727569  | -4.134253 | 3.404928  |
| 41  | 1 | 0 | 5.804940  | -4.854600 | 2.197432  |
| 42  | 1 | 0 | 3.620460  | -6.775321 | 0.969461  |
| 43  | 1 | 0 | 2.964455  | -5.664909 | -0.240173 |
| 44  | 1 | 0 | 4.716685  | -5.815567 | -0.035427 |
| 45  | 1 | 0 | 0.807865  | 1.040632  | 3.576835  |
| 46  | 1 | 0 | 0.538179  | 2.786543  | 3.419463  |
| 47  | 1 | 0 | 1.589050  | 1.935352  | 2.278332  |
| 48  | 8 | 0 | 5.959886  | -3.809156 | 0.066890  |
| 49  | 1 | 0 | 6.640706  | -3.341189 | -0.436955 |
| 50  | 8 | 0 | 6.258689  | -1.465342 | -0.943718 |
| 51  | 1 | 0 | 6.247508  | -0.529712 | -1.306942 |
| 52  | 1 | 0 | -0.993714 | -1.398786 | 3.343791  |
| 53  | 1 | 0 | -0.650311 | -3.116571 | 3.073443  |
| 54  | 1 | 0 | -1.632939 | -2.206498 | 1.914147  |
| 55  | 8 | 0 | 1.758759  | 0.972229  | -0.216450 |
| 56  | 8 | 0 | -6.215038 | 1.541542  | -0.958837 |
| 57  | 1 | 0 | -2.865910 | 5.657644  | -0.146354 |
| 58  | 1 | 0 | -4.609877 | 5.856901  | 0.086534  |
| 59  | 8 | 0 | -5.857013 | 3.876137  | 0.078168  |
| 60  | 1 | 0 | -2.667294 | 4.736753  | 2.136788  |
| 61  | 1 | 0 | -4.567412 | 5.832175  | 3.202822  |
| 62  | 1 | 0 | -4.633703 | 4.086343  | 3.480232  |
| 63  | 1 | 0 | -5.705669 | 4.834173  | 2.284020  |
| 64  | 1 | 0 | -6.218932 | 0.626156  | -1.349378 |
| 65  | 1 | 0 | 0.882732  | 1.381755  | -0.183635 |
| 66  | 1 | 0 | -2.175372 | -0.777838 | -1.183552 |
| 67  | 7 | 0 | 5.477922  | 0.891341  | -1.364363 |
| 68  | 6 | 0 | 5.161506  | 3.284807  | -1.231856 |
| 69  | 6 | 0 | 7.306147  | 2.231588  | -1.821926 |
| 70  | 6 | 0 | 5.608834  | 4.573697  | -1.914468 |
| 71  | 1 | 0 | 5.361411  | 3.324926  | -0.147549 |
| 72  | 1 | 0 | 4.085582  | 3.168636  | -1.373365 |
| 73  | 6 | 0 | 7.764402  | 3.492279  | -2.538234 |
| 74  | 1 | 0 | 7.675425  | 2.236930  | -0.783972 |
| 75  | 1 | 0 | 7.690501  | 1.336384  | -2.314096 |
| 76  | 6 | 0 | 7.126863  | 4.724206  | -1.900838 |
| 77  | 1 | 0 | 5.124054  | 5.413985  | -1.412061 |
| 78  | 1 | 0 | 5.254570  | 4.561902  | -2.950338 |
| 79  | 1 | 0 | 8.854839  | 3.544681  | -2.494191 |
| 80  | 1 | 0 | 7.476510  | 3.431757  | -3.593129 |
| 81  | 1 | 0 | 7.424201  | 5.631696  | -2.431562 |
| 82  | 1 | 0 | 7.477421  | 4.819576  | -0.866531 |
| 83  | 7 | 0 | 5.840003  | 2.129695  | -1.818503 |
| 84  | 7 | 0 | -5.451766 | -0.862335 | -1.384645 |
| 85  | 7 | 0 | -5.859017 | -2.095153 | -1.781891 |
| 86  | 6 | 0 | -5.287644 | -3.259600 | -1.108732 |
| 87  | 6 | 0 | -7.320204 | -2.116556 | -1.930808 |
| 88  | 6 | 0 | -5.747378 | -4.547955 | -1.784237 |
| 89  | 1 | 0 | -5.569832 | -3.251250 | -0.042529 |
| 90  | 1 | 0 | -4.199296 | -3.198455 | -1.170567 |
| 91  | 6 | 0 | -7.778298 | -3.382264 | -2.637812 |
| 92  | 1 | 0 | -7.790153 | -2.051481 | -0.936853 |
| 93  | 1 | 0 | -7.598013 | -1.225715 | -2.496821 |
| 94  | 6 | 0 | -7.267098 | -4.616725 | -1.899560 |
| 95  | 1 | 0 | -5.357130 | -5.393041 | -1.212556 |
| 96  | 1 | 0 | -5.304583 | -4.596134 | -2.784435 |
| 97  | 1 | 0 | -8.869497 | -3.378066 | -2.690872 |
| 98  | 1 | 0 | -7.395277 | -3.379815 | -3.663693 |
| 99  | 1 | 0 | -7.567529 | -5.529057 | -2.419995 |
| 100 | 1 | 0 | -7.709906 | -4.649985 | -0.897097 |

### Structure (R)-13aa (vacuum)

Energy (Hartrees): = -2224.3843705

No imaginary frequencies

Standard orientation:

| Center<br>Number | Atomic<br>Number | Atomic<br>Type | Coordinates (Angstroms) |           |           |
|------------------|------------------|----------------|-------------------------|-----------|-----------|
|                  |                  |                | X                       | Y         | Z         |
| 1                | 6                | 0              | -5.549143               | -1.164956 | -1.556803 |
| 2                | 6                | 0              | -4.527729               | -1.878320 | -2.126525 |
| 3                | 6                | 0              | -3.222293               | -1.774371 | -1.528225 |
| 4                | 6                | 0              | -2.997863               | -0.904632 | -0.413048 |
| 5                | 6                | 0              | -4.082667               | -0.100528 | 0.098452  |
| 6                | 6                | 0              | -5.332158               | -0.276501 | -0.469191 |
| 7                | 6                | 0              | 5.756594                | -3.924060 | 2.951991  |
| 8                | 6                | 0              | -0.236156               | -3.362885 | 2.017854  |
| 9                | 6                | 0              | -4.827790               | -2.761392 | -3.327713 |
| 10               | 6                | 0              | -1.693109               | -0.928509 | 0.165573  |
| 11               | 6                | 0              | -0.662615               | -1.697926 | -0.344525 |

|    |   |   |           |           |           |
|----|---|---|-----------|-----------|-----------|
| 12 | 6 | 0 | -0.888269 | -2.520932 | -1.474670 |
| 13 | 6 | 0 | -2.140459 | -2.547749 | -2.028395 |
| 14 | 6 | 0 | -5.376624 | -1.957168 | -4.515616 |
| 15 | 6 | 0 | -5.757016 | -3.924154 | -2.951459 |
| 16 | 6 | 0 | 0.236053  | -3.363226 | -2.017448 |
| 17 | 6 | 0 | -3.922215 | 0.947671  | 1.118163  |
| 18 | 6 | 0 | 3.922272  | 0.947393  | -1.118387 |
| 19 | 6 | 0 | 0.662587  | -1.697898 | 0.344660  |
| 20 | 6 | 0 | 0.888202  | -2.520723 | 1.474944  |
| 21 | 6 | 0 | 2.140384  | -2.547490 | 2.028688  |
| 22 | 6 | 0 | 3.222253  | -1.774233 | 1.528401  |
| 23 | 6 | 0 | 2.997864  | -0.904677 | 0.413072  |
| 24 | 6 | 0 | 1.693113  | -0.928602 | -0.165556 |
| 25 | 6 | 0 | 4.827727  | -2.760958 | 3.328090  |
| 26 | 6 | 0 | 5.376996  | -1.956532 | 4.515652  |
| 27 | 6 | 0 | 4.527682  | -1.878119 | 2.126730  |
| 28 | 6 | 0 | 5.549111  | -1.164833 | 1.556940  |
| 29 | 6 | 0 | 5.332163  | -0.276557 | 0.469173  |
| 30 | 6 | 0 | 4.082691  | -0.100672 | -0.098534 |
| 31 | 1 | 0 | 2.922361  | 1.192266  | -1.435848 |
| 32 | 1 | 0 | 2.296902  | -3.207737 | 2.867747  |
| 33 | 1 | 0 | -2.922290 | 1.192620  | 1.435521  |
| 34 | 1 | 0 | -2.297015 | -3.208137 | -2.867337 |
| 35 | 1 | 0 | 7.354408  | -0.644103 | 1.490144  |
| 36 | 1 | 0 | 5.906902  | -4.576744 | 3.815859  |
| 37 | 1 | 0 | -3.897052 | -3.204338 | -3.674022 |
| 38 | 8 | 0 | 1.458746  | -0.191666 | -1.290411 |
| 39 | 1 | 0 | -5.477827 | -2.611580 | -5.385363 |
| 40 | 1 | 0 | -4.695865 | -1.144608 | -4.779097 |
| 41 | 1 | 0 | -6.353135 | -1.531365 | -4.289630 |
| 42 | 1 | 0 | -5.907360 | -4.577024 | -3.815180 |
| 43 | 1 | 0 | -5.322394 | -4.518317 | -2.144418 |
| 44 | 1 | 0 | -6.729353 | -3.555000 | -2.624940 |
| 45 | 1 | 0 | -1.075446 | -2.740091 | 2.340723  |
| 46 | 1 | 0 | 0.100073  | -3.955977 | 2.868321  |
| 47 | 1 | 0 | -0.622825 | -4.039434 | 1.250615  |
| 48 | 8 | 0 | -6.819527 | -1.245501 | -2.025566 |
| 49 | 1 | 0 | -7.354463 | -0.644319 | -1.489922 |
| 50 | 8 | 0 | -6.440515 | 0.378146  | -0.080583 |
| 51 | 1 | 0 | -6.178365 | 0.962421  | 0.686287  |
| 52 | 1 | 0 | -0.100207 | -3.956452 | -2.867811 |
| 53 | 1 | 0 | 0.622707  | -4.039659 | -1.250099 |
| 54 | 1 | 0 | 1.075361  | -2.740517 | -2.340433 |
| 55 | 8 | 0 | -1.458710 | -0.191408 | 1.290313  |
| 56 | 8 | 0 | 6.440540  | 0.377989  | 0.080454  |
| 57 | 1 | 0 | 5.321686  | -4.518321 | 2.145177  |
| 58 | 1 | 0 | 6.728976  | -3.555252 | 2.625221  |
| 59 | 8 | 0 | 6.819456  | -1.245233 | 2.025831  |
| 60 | 1 | 0 | 3.896947  | -3.203588 | 3.674685  |
| 61 | 1 | 0 | 5.478270  | -2.610730 | 5.385551  |
| 62 | 1 | 0 | 4.696468  | -1.143759 | 4.779069  |
| 63 | 1 | 0 | 6.353545  | -1.530992 | 4.289316  |
| 64 | 1 | 0 | 6.178434  | 0.962046  | -0.686598 |
| 65 | 1 | 0 | -0.533791 | -0.321183 | 1.540936  |
| 66 | 1 | 0 | 0.533823  | -0.321444 | -1.541017 |
| 67 | 7 | 0 | -4.954291 | 1.554959  | 1.587546  |
| 68 | 6 | 0 | -3.545526 | 3.063235  | 2.850353  |
| 69 | 6 | 0 | -5.898335 | 3.532231  | 2.324801  |
| 70 | 6 | 0 | -3.614343 | 4.037256  | 4.024540  |
| 71 | 1 | 0 | -3.128665 | 3.558580  | 1.954717  |
| 72 | 1 | 0 | -2.881381 | 2.237890  | 3.113972  |
| 73 | 6 | 0 | -6.010498 | 4.480052  | 3.509779  |
| 74 | 1 | 0 | -5.663489 | 4.103193  | 1.410618  |
| 75 | 1 | 0 | -6.835846 | 3.000879  | 2.155221  |
| 76 | 6 | 0 | -4.656877 | 5.127344  | 3.792881  |
| 77 | 1 | 0 | -2.622370 | 4.468001  | 4.179646  |
| 78 | 1 | 0 | -3.873062 | 3.473992  | 4.926321  |
| 79 | 1 | 0 | -6.770975 | 5.234330  | 3.294712  |
| 80 | 1 | 0 | -6.339845 | 3.915112  | 4.387467  |
| 81 | 1 | 0 | -4.714885 | 5.790158  | 4.659013  |
| 82 | 1 | 0 | -4.361438 | 5.741317  | 2.933798  |
| 83 | 7 | 0 | -4.866025 | 2.519655  | 2.556512  |
| 84 | 7 | 0 | 4.954354  | 1.554737  | -1.587685 |
| 85 | 7 | 0 | 4.866127  | 2.519347  | -2.556739 |
| 86 | 6 | 0 | 3.545614  | 3.062766  | -2.850816 |
| 87 | 6 | 0 | 5.898299  | 3.532049  | -2.324962 |
| 88 | 6 | 0 | 3.614501  | 4.036698  | -4.025073 |
| 89 | 1 | 0 | 3.128571  | 3.558139  | -1.955281 |
| 90 | 1 | 0 | 2.881593  | 2.237331  | -3.114466 |
| 91 | 6 | 0 | 6.010534  | 4.479786  | -3.510000 |
| 92 | 1 | 0 | 5.663262  | 4.103060  | -1.410859 |
| 93 | 1 | 0 | 6.835841  | 3.000807  | -2.155205 |
| 94 | 6 | 0 | 4.656886  | 5.126914  | -3.793351 |
| 95 | 1 | 0 | 2.622505  | 4.467326  | -4.180360 |
| 96 | 1 | 0 | 3.873412  | 3.473387  | -4.926770 |
| 97 | 1 | 0 | 6.770901  | 5.234161  | -3.294884 |
| 98 | 1 | 0 | 6.340067  | 3.914810  | -4.387594 |
| 99 | 1 | 0 | 4.714951  | 5.789664  | -4.659527 |

100            1            0            4.361258    5.740925    -2.934360

-----  
**Structure (R)-13aa (CHCl<sub>3</sub>)**

Energy (Hartrees): = -2224.4274525  
No imaginary frequencies

Standard orientation:

-----

| Center<br>Number | Atomic<br>Number | Atomic<br>Type | Coordinates (Angstroms) |           |           |
|------------------|------------------|----------------|-------------------------|-----------|-----------|
|                  |                  |                | X                       | Y         | Z         |
| 1                | 6                | 0              | 5.607797                | -1.246465 | 1.316938  |
| 2                | 6                | 0              | 4.624007                | -1.990931 | 1.915396  |
| 3                | 6                | 0              | 3.286979                | -1.879676 | 1.390128  |
| 4                | 6                | 0              | 2.995739                | -0.962278 | 0.330638  |
| 5                | 6                | 0              | 4.038038                | -0.107601 | -0.186884 |
| 6                | 6                | 0              | 5.321709                | -0.303306 | 0.292432  |
| 7                | 6                | 0              | -5.872595               | -4.083203 | -2.569160 |
| 8                | 6                | 0              | 0.126143                | -3.530943 | -1.970117 |
| 9                | 6                | 0              | 4.992749                | -2.924438 | 3.059174  |
| 10               | 6                | 0              | 1.671481                | -0.993430 | -0.204790 |
| 11               | 6                | 0              | 0.675953                | -1.798977 | 0.317304  |
| 12               | 6                | 0              | 0.962477                | -2.658626 | 1.406466  |
| 13               | 6                | 0              | 2.239410                | -2.692793 | 1.903381  |
| 14               | 6                | 0              | 5.638318                | -2.182895 | 4.238829  |
| 15               | 6                | 0              | 5.871910                | -4.083172 | 2.570106  |
| 16               | 6                | 0              | -0.126737               | -3.530429 | 1.970584  |
| 17               | 6                | 0              | 3.801534                | 1.018512  | -1.106749 |
| 18               | 6                | 0              | -3.801359               | 1.019164  | 1.106283  |
| 19               | 6                | 0              | -0.676287               | -1.798967 | -0.317256 |
| 20               | 6                | 0              | -0.962948               | -2.658861 | -1.406190 |
| 21               | 6                | 0              | -2.239904               | -2.693013 | -1.903052 |
| 22               | 6                | 0              | -3.287363               | -1.879649 | -1.389966 |
| 23               | 6                | 0              | -2.995971               | -0.962005 | -0.330735 |
| 24               | 6                | 0              | -1.671705               | -0.993167 | 0.204658  |
| 25               | 6                | 0              | -4.993356               | -2.924689 | -3.058611 |
| 26               | 6                | 0              | -5.638942               | -2.183404 | -4.238419 |
| 27               | 6                | 0              | -4.624436               | -1.990904 | -1.915117 |
| 28               | 6                | 0              | -5.608103               | -1.246156 | -1.316807 |
| 29               | 6                | 0              | -5.321854               | -0.302742 | -0.292578 |
| 30               | 6                | 0              | -4.038131               | -0.107077 | 0.186637  |
| 31               | 1                | 0              | -2.781701               | 1.303186  | 1.312678  |
| 32               | 1                | 0              | -2.440214               | -3.387263 | -2.705244 |
| 33               | 1                | 0              | 2.781950                | 1.302655  | -1.313334 |
| 34               | 1                | 0              | 2.439612                | -3.386856 | 2.705763  |
| 35               | 1                | 0              | -7.414534               | -0.707234 | -1.187151 |
| 36               | 1                | 0              | -6.076994               | -4.774311 | -3.391619 |
| 37               | 1                | 0              | 4.080526                | -3.365779 | 3.453319  |
| 38               | 8                | 0              | -1.400336               | -0.227482 | 1.296983  |
| 39               | 1                | 0              | 5.769749                | -2.873729 | 5.076147  |
| 40               | 1                | 0              | 5.002418                | -1.360751 | 4.576980  |
| 41               | 1                | 0              | 6.614243                | -1.777568 | 3.973920  |
| 42               | 1                | 0              | 6.076191                | -4.774068 | 3.392773  |
| 43               | 1                | 0              | 5.371049                | -4.640354 | 1.774138  |
| 44               | 1                | 0              | 6.825163                | -3.716116 | 2.186216  |
| 45               | 1                | 0              | 0.962570                | -2.927269 | -2.335391 |
| 46               | 1                | 0              | -0.249063               | -4.133985 | -2.797455 |
| 47               | 1                | 0              | 0.529539                | -4.201934 | -1.205766 |
| 48               | 8                | 0              | 6.903792                | -1.345692 | 1.706412  |
| 49               | 1                | 0              | 7.414308                | -0.707816 | 1.187218  |
| 50               | 8                | 0              | 6.396985                | 0.387880  | -0.124287 |
| 51               | 1                | 0              | 6.078178                | 1.013098  | -0.840875 |
| 52               | 1                | 0              | 0.248382                | -4.133340 | 2.798057  |
| 53               | 1                | 0              | -0.530226               | -4.201532 | 1.206381  |
| 54               | 1                | 0              | -0.963078               | -2.926553 | 2.335723  |
| 55               | 8                | 0              | 1.400214                | -0.228015 | -1.297330 |
| 56               | 8                | 0              | -6.397033               | 0.388722  | 0.123923  |
| 57               | 1                | 0              | -5.371734               | -4.640207 | -1.773068 |
| 58               | 1                | 0              | -6.825788               | -3.715951 | -2.185310 |
| 59               | 8                | 0              | -6.904128               | -1.345324 | -1.706192 |
| 60               | 1                | 0              | -4.081207               | -3.366230 | -3.452702 |
| 61               | 1                | 0              | -5.770510               | -2.874453 | -5.075539 |
| 62               | 1                | 0              | -5.002987               | -1.361415 | -4.576846 |
| 63               | 1                | 0              | -6.614805               | -1.777905 | -3.973543 |
| 64               | 1                | 0              | -6.078106               | 1.014237  | 0.840204  |
| 65               | 1                | 0              | 0.474573                | -0.361621 | -1.548300 |
| 66               | 1                | 0              | -0.474705               | -0.361115 | 1.547970  |
| 67               | 7                | 0              | 4.802803                | 1.648886  | -1.611085 |
| 68               | 6                | 0              | 3.345366                | 3.310740  | -2.592358 |
| 69               | 6                | 0              | 5.761431                | 3.650069  | -2.255934 |
| 70               | 6                | 0              | 3.345960                | 4.395740  | -3.665902 |
| 71               | 1                | 0              | 3.036788                | 3.726070  | -1.617142 |
| 72               | 1                | 0              | 2.626145                | 2.538745  | -2.872005 |
| 73               | 6                | 0              | 5.795547                | 4.709647  | -3.346327 |
| 74               | 1                | 0              | 5.638746                | 4.129694  | -1.271293 |

-----

|     |   |   |           |          |           |
|-----|---|---|-----------|----------|-----------|
| 75  | 1 | 0 | 6.688449  | 3.074683 | -2.237384 |
| 76  | 6 | 0 | 4.448969  | 5.423479 | -3.430421 |
| 77  | 1 | 0 | 2.361603  | 4.869572 | -3.678016 |
| 78  | 1 | 0 | 3.493894  | 3.921280 | -4.641244 |
| 79  | 1 | 0 | 6.602934  | 5.413067 | -3.130102 |
| 80  | 1 | 0 | 6.019143  | 4.229581 | -4.304553 |
| 81  | 1 | 0 | 4.453576  | 6.167147 | -4.230774 |
| 82  | 1 | 0 | 4.260461  | 5.955749 | -2.490564 |
| 83  | 7 | 0 | 4.666636  | 2.697303 | -2.478365 |
| 84  | 7 | 0 | -4.802445 | 1.649617 | 1.610888  |
| 85  | 7 | 0 | -4.665967 | 2.698047 | 2.478106  |
| 86  | 6 | 0 | -3.344636 | 3.311429 | 2.591672  |
| 87  | 6 | 0 | -5.760791 | 3.650856 | 2.255995  |
| 88  | 6 | 0 | -3.344847 | 4.396449 | 3.665195  |
| 89  | 1 | 0 | -3.036344 | 3.726727 | 1.616352  |
| 90  | 1 | 0 | -2.625361 | 2.539408 | 2.871109  |
| 91  | 6 | 0 | -5.794521 | 4.710455 | 3.346380  |
| 92  | 1 | 0 | -5.638391 | 4.130456 | 1.271308  |
| 93  | 1 | 0 | -6.687840 | 3.075511 | 2.237744  |
| 94  | 6 | 0 | -4.447886 | 5.424231 | 3.430041  |
| 95  | 1 | 0 | -2.360466 | 4.870240 | 3.676992  |
| 96  | 1 | 0 | -3.492496 | 3.922013 | 4.640592  |
| 97  | 1 | 0 | -6.601946 | 5.413905 | 3.130392  |
| 98  | 1 | 0 | -6.017840 | 4.230416 | 4.304685  |
| 99  | 1 | 0 | -4.452213 | 6.167913 | 4.230383  |
| 100 | 1 | 0 | -4.259651 | 5.956477 | 2.490116  |

### Structure (R)-13aa (DMSO)

Energy (Hartrees): = -2224.4171088  
 No imaginary frequencies

Standard orientation:

| Center<br>Number | Atomic<br>Number | Atomic<br>Type | Coordinates (Angstroms) |           |           |
|------------------|------------------|----------------|-------------------------|-----------|-----------|
|                  |                  |                | X                       | Y         | Z         |
| 1                | 6                | 0              | 5.620924                | -1.258874 | 1.241243  |
| 2                | 6                | 0              | 4.653821                | -2.023760 | 1.842158  |
| 3                | 6                | 0              | 3.307630                | -1.916602 | 1.339669  |
| 4                | 6                | 0              | 2.991349                | -0.982541 | 0.302167  |
| 5                | 6                | 0              | 4.016085                | -0.107425 | -0.215487 |
| 6                | 6                | 0              | 5.309570                | -0.299688 | 0.238773  |
| 7                | 6                | 0              | -5.935200               | -4.110661 | -2.445560 |
| 8                | 6                | 0              | 0.078288                | -3.614825 | -1.936048 |
| 9                | 6                | 0              | 5.047675                | -2.972337 | 2.964589  |
| 10               | 6                | 0              | 1.660067                | -1.016885 | -0.215967 |
| 11               | 6                | 0              | 0.681129                | -1.842754 | 0.306295  |
| 12               | 6                | 0              | 0.992589                | -2.720163 | 1.374108  |
| 13               | 6                | 0              | 2.276433                | -2.750606 | 1.853604  |
| 14               | 6                | 0              | 5.697781                | -2.241873 | 4.147964  |
| 15               | 6                | 0              | 5.935342                | -4.110575 | 2.445534  |
| 16               | 6                | 0              | -0.078229               | -3.614851 | 1.936012  |
| 17               | 6                | 0              | 3.751623                | 1.041146  | -1.100029 |
| 18               | 6                | 0              | -3.751623               | 1.041106  | 1.100042  |
| 19               | 6                | 0              | -0.681086               | -1.842756 | -0.306309 |
| 20               | 6                | 0              | -0.992538               | -2.720154 | -1.374133 |
| 21               | 6                | 0              | -2.276382               | -2.750603 | -1.853630 |
| 22               | 6                | 0              | -3.307588               | -1.916616 | -1.339682 |
| 23               | 6                | 0              | -2.991314               | -0.982564 | -0.302169 |
| 24               | 6                | 0              | -1.660031               | -1.016903 | 0.215965  |
| 25               | 6                | 0              | -5.047629               | -2.972346 | -2.964612 |
| 26               | 6                | 0              | -5.697843               | -2.241872 | -4.147920 |
| 27               | 6                | 0              | -4.653780               | -2.023786 | -1.842166 |
| 28               | 6                | 0              | -5.620889               | -1.258911 | -1.241248 |
| 29               | 6                | 0              | -5.309542               | -0.299730 | -0.238771 |
| 30               | 6                | 0              | -4.016061               | -0.107462 | 0.215493  |
| 31               | 1                | 0              | -2.726982               | 1.334108  | 1.267193  |
| 32               | 1                | 0              | -2.492981               | -3.455461 | -2.642584 |
| 33               | 1                | 0              | 2.726974                | 1.334121  | -1.267179 |
| 34               | 1                | 0              | 2.493040                | -3.455472 | 2.642550  |
| 35               | 1                | 0              | -7.414876               | -0.699406 | -1.084016 |
| 36               | 1                | 0              | -6.160030               | -4.810418 | -3.255177 |
| 37               | 1                | 0              | 4.146826                | -3.433082 | 3.361985  |
| 38               | 8                | 0              | -1.367655               | -0.235529 | 1.289973  |
| 39               | 1                | 0              | 5.852135                | -2.946050 | 4.970088  |
| 40               | 1                | 0              | 5.052795                | -1.437526 | 4.511209  |
| 41               | 1                | 0              | 6.663123                | -1.815159 | 3.877170  |
| 42               | 1                | 0              | 6.160178                | -4.810350 | 3.255133  |
| 43               | 1                | 0              | 5.430200                | -4.664285 | 1.649541  |
| 44               | 1                | 0              | 6.878151                | -3.725860 | 2.052936  |
| 45               | 1                | 0              | 0.920832                | -3.028172 | -2.314973 |
| 46               | 1                | 0              | -0.314217               | -4.220565 | -2.753252 |
| 47               | 1                | 0              | 0.474625                | -4.283924 | -1.165862 |
| 48               | 8                | 0              | 6.924210                | -1.349253 | 1.606740  |
| 49               | 1                | 0              | 7.414910                | -0.699377 | 1.083986  |

|     |   |   |           |           |           |
|-----|---|---|-----------|-----------|-----------|
| 50  | 8 | 0 | 6.370525  | 0.410399  | -0.180969 |
| 51  | 1 | 0 | 6.030504  | 1.045569  | -0.880792 |
| 52  | 1 | 0 | 0.314280  | -4.220595 | 2.753210  |
| 53  | 1 | 0 | -0.474560 | -4.283946 | 1.165819  |
| 54  | 1 | 0 | -0.920779 | -3.028209 | 2.314942  |
| 55  | 8 | 0 | 1.367685  | -0.235494 | -1.289963 |
| 56  | 8 | 0 | -6.370497 | 0.410358  | 0.180970  |
| 57  | 1 | 0 | -5.429984 | -4.664372 | -1.649615 |
| 58  | 1 | 0 | -6.878015 | -3.726024 | -2.052901 |
| 59  | 8 | 0 | -6.924169 | -1.349280 | -1.606767 |
| 60  | 1 | 0 | -4.146773 | -3.433023 | -3.362071 |
| 61  | 1 | 0 | -5.852214 | -2.946026 | -4.970061 |
| 62  | 1 | 0 | -5.052920 | -1.437479 | -4.511175 |
| 63  | 1 | 0 | -6.663189 | -1.815215 | -3.877049 |
| 64  | 1 | 0 | -6.030475 | 1.045531  | 0.880789  |
| 65  | 1 | 0 | 0.443597  | -0.386340 | -1.538017 |
| 66  | 1 | 0 | -0.443565 | -0.386372 | 1.538025  |
| 67  | 7 | 0 | 4.741094  | 1.679799  | -1.617653 |
| 68  | 6 | 0 | 3.269312  | 3.378982  | -2.509735 |
| 69  | 6 | 0 | 5.697224  | 3.691927  | -2.232290 |
| 70  | 6 | 0 | 3.249784  | 4.491307  | -3.554441 |
| 71  | 1 | 0 | 2.996598  | 3.771276  | -1.515226 |
| 72  | 1 | 0 | 2.533944  | 2.621885  | -2.787755 |
| 73  | 6 | 0 | 5.709819  | 4.779069  | -3.295200 |
| 74  | 1 | 0 | 5.599166  | 4.147280  | -1.234021 |
| 75  | 1 | 0 | 6.620899  | 3.110925  | -2.251138 |
| 76  | 6 | 0 | 4.367211  | 5.504044  | -3.323350 |
| 77  | 1 | 0 | 2.269345  | 4.972145  | -3.524512 |
| 78  | 1 | 0 | 3.365991  | 4.042289  | -4.546243 |
| 79  | 1 | 0 | 6.528080  | 5.470394  | -3.080827 |
| 80  | 1 | 0 | 5.904632  | 4.324660  | -4.272313 |
| 81  | 1 | 0 | 4.355626  | 6.268012  | -4.104317 |
| 82  | 1 | 0 | 4.209454  | 6.011421  | -2.364429 |
| 83  | 7 | 0 | 4.589011  | 2.751483  | -2.451313 |
| 84  | 7 | 0 | -4.741114 | 1.679730  | 1.617665  |
| 85  | 7 | 0 | -4.589065 | 2.751418  | 2.451327  |
| 86  | 6 | 0 | -3.269386 | 3.378959  | 2.509753  |
| 87  | 6 | 0 | -5.697308 | 3.691827  | 2.232304  |
| 88  | 6 | 0 | -3.249896 | 4.491280  | 3.554464  |
| 89  | 1 | 0 | -2.996683 | 3.771266  | 1.515246  |
| 90  | 1 | 0 | -2.533993 | 2.621885  | 2.787770  |
| 91  | 6 | 0 | -5.709940 | 4.778964  | 3.295218  |
| 92  | 1 | 0 | -5.599262 | 4.147186  | 1.234036  |
| 93  | 1 | 0 | -6.620963 | 3.110795  | 2.251148  |
| 94  | 6 | 0 | -4.367355 | 5.503982  | 3.323375  |
| 95  | 1 | 0 | -2.269472 | 4.972150  | 3.524540  |
| 96  | 1 | 0 | -3.366091 | 4.042254  | 4.546264  |
| 97  | 1 | 0 | -6.528222 | 5.470264  | 3.080846  |
| 98  | 1 | 0 | -5.904741 | 4.324545  | 4.272328  |
| 99  | 1 | 0 | -4.355796 | 6.267947  | 4.104346  |
| 100 | 1 | 0 | -4.209612 | 6.011369  | 2.364457  |

### Structure (R)-13aa' (vacuum)

Energy (Hartrees): = -2224.3754405

No imaginary frequencies

Standard orientation:

| Center Number | Atomic Number | Atomic Type | Coordinates (Angstroms) |           |           |
|---------------|---------------|-------------|-------------------------|-----------|-----------|
|               |               |             | X                       | Y         | Z         |
| 1             | 6             | 0           | -4.925863               | 2.842290  | -0.370817 |
| 2             | 6             | 0           | -3.847458               | 3.156187  | -1.159347 |
| 3             | 6             | 0           | -2.789532               | 2.185848  | -1.273214 |
| 4             | 6             | 0           | -2.870270               | 0.951518  | -0.564264 |
| 5             | 6             | 0           | -4.078554               | 0.604508  | 0.138512  |
| 6             | 6             | 0           | -5.054188               | 1.573836  | 0.259709  |
| 7             | 6             | 0           | 5.047444                | -4.761288 | -2.706635 |
| 8             | 6             | 0           | -0.769267               | -2.302823 | -2.524255 |
| 9             | 6             | 0           | -3.802494               | 4.509992  | -1.848545 |
| 10            | 6             | 0           | -1.707821               | 0.127532  | -0.540682 |
| 11            | 6             | 0           | -0.605856               | 0.375337  | -1.334179 |
| 12            | 6             | 0           | -0.601484               | 1.529215  | -2.163501 |
| 13            | 6             | 0           | -1.649173               | 2.413699  | -2.086921 |
| 14            | 6             | 0           | -3.793983               | 5.663970  | -0.834953 |
| 15            | 6             | 0           | -4.933884               | 4.663069  | -2.874603 |
| 16            | 6             | 0           | 0.566326                | 1.786592  | -3.080097 |
| 17            | 6             | 0           | -4.395818               | -0.776624 | 0.533305  |
| 18            | 6             | 0           | 4.387886                | 0.855858  | 0.492766  |
| 19            | 6             | 0           | 0.566794                | -0.544932 | -1.291762 |
| 20            | 6             | 0           | 0.500963                | -1.833919 | -1.866076 |
| 21            | 6             | 0           | 1.602090                | -2.644983 | -1.794347 |
| 22            | 6             | 0           | 2.813551                | -2.248508 | -1.169918 |
| 23            | 6             | 0           | 2.902230                | -0.937555 | -0.604447 |
| 24            | 6             | 0           | 1.726953                | -0.130903 | -0.667876 |

|     |   |   |           |           |           |
|-----|---|---|-----------|-----------|-----------|
| 25  | 6 | 0 | 3.907969  | -4.551796 | -1.698609 |
| 26  | 6 | 0 | 3.903325  | -5.636796 | -0.612665 |
| 27  | 6 | 0 | 3.925861  | -3.159825 | -1.086979 |
| 28  | 6 | 0 | 5.032641  | -2.756578 | -0.388629 |
| 29  | 6 | 0 | 5.137484  | -1.453038 | 0.166875  |
| 30  | 6 | 0 | 4.124783  | -0.518819 | 0.041856  |
| 31  | 1 | 0 | 3.680335  | 1.618554  | 0.212908  |
| 32  | 1 | 0 | 1.516975  | -3.633372 | -2.219791 |
| 33  | 1 | 0 | -3.813154 | -1.567524 | 0.075155  |
| 34  | 1 | 0 | -1.595515 | 3.304504  | -2.695389 |
| 35  | 1 | 0 | 6.760687  | -3.072821 | 0.282840  |
| 36  | 1 | 0 | 4.933707  | -5.735260 | -3.190097 |
| 37  | 1 | 0 | -2.867211 | 4.583608  | -2.399553 |
| 38  | 8 | 0 | 1.749779  | 1.101786  | -0.070970 |
| 39  | 1 | 0 | -3.673254 | 6.615287  | -1.359303 |
| 40  | 1 | 0 | -2.964541 | 5.554309  | -0.132674 |
| 41  | 1 | 0 | -4.724378 | 5.697716  | -0.268992 |
| 42  | 1 | 0 | -4.833287 | 5.616786  | -3.398859 |
| 43  | 1 | 0 | -4.895109 | 3.860206  | -3.614162 |
| 44  | 1 | 0 | -5.907990 | 4.638674  | -2.386543 |
| 45  | 1 | 0 | -0.611016 | -3.254292 | -3.032753 |
| 46  | 1 | 0 | -1.130769 | -1.573592 | -3.253991 |
| 47  | 1 | 0 | -1.557868 | -2.436674 | -1.778217 |
| 48  | 8 | 0 | -5.953933 | 3.712126  | -0.199614 |
| 49  | 1 | 0 | -6.617824 | 3.267832  | 0.343415  |
| 50  | 8 | 0 | -6.220979 | 1.398439  | 0.908137  |
| 51  | 1 | 0 | -6.213286 | 0.487637  | 1.291786  |
| 52  | 1 | 0 | 0.365490  | 2.640203  | -3.727629 |
| 53  | 1 | 0 | 0.769760  | 0.911408  | -3.701642 |
| 54  | 1 | 0 | 1.476999  | 1.989968  | -2.509876 |
| 55  | 8 | 0 | -1.628632 | -0.963783 | 0.286295  |
| 56  | 8 | 0 | 6.313658  | -1.220627 | 0.778017  |
| 57  | 1 | 0 | 5.021019  | -3.991372 | -3.481025 |
| 58  | 1 | 0 | 6.020460  | -4.729149 | -2.219082 |
| 59  | 8 | 0 | 6.100793  | -3.577353 | -0.211040 |
| 60  | 1 | 0 | 2.986890  | -4.668574 | -2.264839 |
| 61  | 1 | 0 | 3.823395  | -6.626468 | -1.070471 |
| 62  | 1 | 0 | 3.055311  | -5.501845 | 0.062752  |
| 63  | 1 | 0 | 4.821722  | -5.600957 | -0.026003 |
| 64  | 1 | 0 | 6.288657  | -0.278659 | 1.107578  |
| 65  | 1 | 0 | -2.112657 | -0.779314 | 1.097578  |
| 66  | 1 | 0 | 0.851780  | 1.455580  | -0.085044 |
| 67  | 7 | 0 | -5.388007 | -1.022543 | 1.314016  |
| 68  | 6 | 0 | -4.945096 | -3.398569 | 1.208354  |
| 69  | 6 | 0 | -6.340403 | -2.358606 | 2.947009  |
| 70  | 6 | 0 | -5.634235 | -4.737888 | 1.458708  |
| 71  | 1 | 0 | -3.992120 | -3.337004 | 1.764774  |
| 72  | 1 | 0 | -4.713965 | -3.320210 | 0.144476  |
| 73  | 6 | 0 | -7.074839 | -3.669181 | 3.187034  |
| 74  | 1 | 0 | -5.512021 | -2.258512 | 3.667860  |
| 75  | 1 | 0 | -7.001940 | -1.501807 | 3.078888  |
| 76  | 6 | 0 | -6.153346 | -4.849448 | 2.889395  |
| 77  | 1 | 0 | -4.927743 | -5.539622 | 1.232536  |
| 78  | 1 | 0 | -6.471223 | -4.831276 | 0.760029  |
| 79  | 1 | 0 | -7.426792 | -3.695313 | 4.220836  |
| 80  | 1 | 0 | -7.953139 | -3.710345 | 2.535307  |
| 81  | 1 | 0 | -6.675624 | -5.797660 | 3.032371  |
| 82  | 1 | 0 | -5.308556 | -4.836477 | 3.588144  |
| 83  | 7 | 0 | -5.817318 | -2.290796 | 1.579512  |
| 84  | 7 | 0 | 5.451687  | 1.128830  | 1.161955  |
| 85  | 7 | 0 | 5.795067  | 2.414180  | 1.504307  |
| 86  | 6 | 0 | 4.776845  | 3.446321  | 1.350684  |
| 87  | 6 | 0 | 6.438706  | 2.405617  | 2.820116  |
| 88  | 6 | 0 | 5.357752  | 4.822919  | 1.663756  |
| 89  | 1 | 0 | 3.908032  | 3.227563  | 1.997252  |
| 90  | 1 | 0 | 4.428909  | 3.441542  | 0.316177  |
| 91  | 6 | 0 | 7.067247  | 3.756935  | 3.128034  |
| 92  | 1 | 0 | 5.698643  | 2.151758  | 3.597946  |
| 93  | 1 | 0 | 7.189210  | 1.614269  | 2.804236  |
| 94  | 6 | 0 | 6.014163  | 4.859237  | 3.041040  |
| 95  | 1 | 0 | 4.559985  | 5.565532  | 1.587398  |
| 96  | 1 | 0 | 6.104509  | 5.063121  | 0.900499  |
| 97  | 1 | 0 | 7.520431  | 3.722459  | 4.121571  |
| 98  | 1 | 0 | 7.864665  | 3.950222  | 2.403708  |
| 99  | 1 | 0 | 6.459968  | 5.839155  | 3.226127  |
| 100 | 1 | 0 | 5.253273  | 4.697392  | 3.813680  |

-----

**Structure (R)-13aa' (CHCl<sub>3</sub>)**

Energy (Hartrees): = -2224.4213604  
 No imaginary frequencies

Standard orientation:

-----

| Center<br>Number | Atomic<br>Number | Atomic<br>Type | Coordinates (Angstroms) |   |   |
|------------------|------------------|----------------|-------------------------|---|---|
|                  |                  |                | X                       | Y | Z |

|    |   |   |           |           |           |
|----|---|---|-----------|-----------|-----------|
| 1  | 6 | 0 | -4.921495 | 2.872715  | -0.324824 |
| 2  | 6 | 0 | -3.831659 | 3.205749  | -1.090926 |
| 3  | 6 | 0 | -2.775470 | 2.234168  | -1.219038 |
| 4  | 6 | 0 | -2.873198 | 0.975113  | -0.553477 |
| 5  | 6 | 0 | -4.091991 | 0.613934  | 0.124151  |
| 6  | 6 | 0 | -5.062109 | 1.586914  | 0.267639  |
| 7  | 6 | 0 | 4.918069  | -4.805860 | -2.710132 |
| 8  | 6 | 0 | -0.734947 | -2.176149 | -2.681299 |
| 9  | 6 | 0 | -3.776089 | 4.576250  | -1.748058 |
| 10 | 6 | 0 | -1.713407 | 0.143643  | -0.543146 |
| 11 | 6 | 0 | -0.597658 | 0.419501  | -1.309725 |
| 12 | 6 | 0 | -0.566405 | 1.611271  | -2.083597 |
| 13 | 6 | 0 | -1.614692 | 2.494313  | -1.994848 |
| 14 | 6 | 0 | -3.771647 | 5.709870  | -0.712757 |
| 15 | 6 | 0 | -4.895532 | 4.756809  | -2.782425 |
| 16 | 6 | 0 | 0.626896  | 1.917102  | -2.949808 |
| 17 | 6 | 0 | -4.418466 | -0.774026 | 0.491426  |
| 18 | 6 | 0 | 4.399391  | 0.810241  | 0.494956  |
| 19 | 6 | 0 | 0.566551  | -0.514346 | -1.286543 |
| 20 | 6 | 0 | 0.507307  | -1.770810 | -1.934614 |
| 21 | 6 | 0 | 1.587694  | -2.611178 | -1.854472 |
| 22 | 6 | 0 | 2.780872  | -2.268229 | -1.162887 |
| 23 | 6 | 0 | 2.880790  | -0.970857 | -0.568900 |
| 24 | 6 | 0 | 1.713191  | -0.149190 | -0.609202 |
| 25 | 6 | 0 | 3.822312  | -4.604263 | -1.654278 |
| 26 | 6 | 0 | 3.864802  | -5.697353 | -0.577265 |
| 27 | 6 | 0 | 3.866841  | -3.208771 | -1.049427 |
| 28 | 6 | 0 | 4.977061  | -2.824590 | -0.341956 |
| 29 | 6 | 0 | 5.102831  | -1.522315 | 0.213468  |
| 30 | 6 | 0 | 4.105529  | -0.571921 | 0.083261  |
| 31 | 1 | 0 | 3.724529  | 1.586794  | 0.171919  |
| 32 | 1 | 0 | 1.502790  | -3.572970 | -2.338161 |
| 33 | 1 | 0 | -3.845301 | -1.565432 | 0.023543  |
| 34 | 1 | 0 | -1.538696 | 3.414056  | -2.556228 |
| 35 | 1 | 0 | 6.707096  | -3.185105 | 0.331382  |
| 36 | 1 | 0 | 4.806150  | -5.787751 | -3.178699 |
| 37 | 1 | 0 | -2.837545 | 4.659209  | -2.291223 |
| 38 | 8 | 0 | 1.740645  | 1.036065  | 0.068381  |
| 39 | 1 | 0 | -3.635476 | 6.670383  | -1.217130 |
| 40 | 1 | 0 | -2.952125 | 5.583403  | -0.000698 |
| 41 | 1 | 0 | -4.708011 | 5.745888  | -0.155561 |
| 42 | 1 | 0 | -4.785661 | 5.722229  | -3.284087 |
| 43 | 1 | 0 | -4.850990 | 3.973143  | -3.543025 |
| 44 | 1 | 0 | -5.878551 | 4.724694  | -2.311541 |
| 45 | 1 | 0 | -0.579342 | -3.120985 | -3.203590 |
| 46 | 1 | 0 | -1.020713 | -1.417874 | -3.415401 |
| 47 | 1 | 0 | -1.577732 | -2.299273 | -1.995035 |
| 48 | 8 | 0 | -5.944552 | 3.745219  | -0.141728 |
| 49 | 1 | 0 | -6.622635 | 3.304400  | 0.389554  |
| 50 | 8 | 0 | -6.232129 | 1.398639  | 0.905019  |
| 51 | 1 | 0 | -6.225135 | 0.475813  | 1.270535  |
| 52 | 1 | 0 | 0.469517  | 2.842066  | -3.505531 |
| 53 | 1 | 0 | 0.810790  | 1.109775  | -3.663522 |
| 54 | 1 | 0 | 1.534839  | 2.028013  | -2.349834 |
| 55 | 8 | 0 | -1.647411 | -0.979517 | 0.236093  |
| 56 | 8 | 0 | 6.281422  | -1.300893 | 0.823430  |
| 57 | 1 | 0 | 4.844809  | -4.047335 | -3.493723 |
| 58 | 1 | 0 | 5.912592  | -4.748150 | -2.267262 |
| 59 | 8 | 0 | 6.030772  | -3.664493 | -0.168136 |
| 60 | 1 | 0 | 2.874391  | -4.726604 | -2.172075 |
| 61 | 1 | 0 | 3.740466  | -6.680005 | -1.040984 |
| 62 | 1 | 0 | 3.057661  | -5.560823 | 0.146965  |
| 63 | 1 | 0 | 4.813046  | -5.690410 | -0.039609 |
| 64 | 1 | 0 | 6.267488  | -0.353073 | 1.146051  |
| 65 | 1 | 0 | -2.129072 | -0.834200 | 1.059604  |
| 66 | 1 | 0 | 0.849994  | 1.412902  | 0.067006  |
| 67 | 7 | 0 | -5.416272 | -1.018696 | 1.265418  |
| 68 | 6 | 0 | -4.995293 | -3.397464 | 1.149634  |
| 69 | 6 | 0 | -6.397564 | -2.350977 | 2.884992  |
| 70 | 6 | 0 | -5.701206 | -4.729723 | 1.386690  |
| 71 | 1 | 0 | -4.051800 | -3.346173 | 1.720975  |
| 72 | 1 | 0 | -4.750234 | -3.315196 | 0.089271  |
| 73 | 6 | 0 | -7.142114 | -3.657083 | 3.114090  |
| 74 | 1 | 0 | -5.571855 | -2.260885 | 3.608806  |
| 75 | 1 | 0 | -7.055703 | -1.491150 | 3.016888  |
| 76 | 6 | 0 | -6.231060 | -4.844427 | 2.812988  |
| 77 | 1 | 0 | -4.999434 | -5.535944 | 1.161375  |
| 78 | 1 | 0 | -6.533756 | -4.812494 | 0.680784  |
| 79 | 1 | 0 | -7.495385 | -3.683698 | 4.147581  |
| 80 | 1 | 0 | -8.020440 | -3.688197 | 2.461253  |
| 81 | 1 | 0 | -6.766161 | -5.787474 | 2.945253  |
| 82 | 1 | 0 | -5.390297 | -4.844964 | 3.516847  |
| 83 | 7 | 0 | -5.862339 | -2.281297 | 1.519190  |
| 84 | 7 | 0 | 5.466455  | 1.069978  | 1.164524  |
| 85 | 7 | 0 | 5.862313  | 2.349006  | 1.457001  |
| 86 | 6 | 0 | 4.880538  | 3.415066  | 1.271735  |
| 87 | 6 | 0 | 6.522846  | 2.364321  | 2.768023  |

|     |   |   |          |          |          |
|-----|---|---|----------|----------|----------|
| 88  | 6 | 0 | 5.512848 | 4.778865 | 1.535310 |
| 89  | 1 | 0 | 4.012848 | 3.248216 | 1.933417 |
| 90  | 1 | 0 | 4.525546 | 3.388029 | 0.240056 |
| 91  | 6 | 0 | 7.198009 | 3.703817 | 3.021667 |
| 92  | 1 | 0 | 5.781575 | 2.164404 | 3.558611 |
| 93  | 1 | 0 | 7.247912 | 1.549095 | 2.772722 |
| 94  | 6 | 0 | 6.181144 | 4.836979 | 2.905895 |
| 95  | 1 | 0 | 4.737893 | 5.543319 | 1.440756 |
| 96  | 1 | 0 | 6.260379 | 4.970534 | 0.758722 |
| 97  | 1 | 0 | 7.658109 | 3.686045 | 4.012495 |
| 98  | 1 | 0 | 7.995737 | 3.846998 | 2.285512 |
| 99  | 1 | 0 | 6.661879 | 5.806624 | 3.054878 |
| 100 | 1 | 0 | 5.421810 | 4.724378 | 3.688815 |

### Structure (R)-13aa' (DMSO)

Energy (Hartrees): = -2224.4114316  
No imaginary frequencies

Standard orientation:

| Center<br>Number | Atomic<br>Number | Atomic<br>Type | Coordinates (Angstroms) |           |           |
|------------------|------------------|----------------|-------------------------|-----------|-----------|
|                  |                  |                | X                       | Y         | Z         |
| 1                | 6                | 0              | -4.918758               | 2.873117  | -0.338255 |
| 2                | 6                | 0              | -3.824110               | 3.203186  | -1.099199 |
| 3                | 6                | 0              | -2.769738               | 2.228486  | -1.220693 |
| 4                | 6                | 0              | -2.868476               | 0.975352  | -0.543602 |
| 5                | 6                | 0              | -4.090078               | 0.617531  | 0.130065  |
| 6                | 6                | 0              | -5.061734               | 1.590751  | 0.261485  |
| 7                | 6                | 0              | 4.910457                | -4.796651 | -2.723859 |
| 8                | 6                | 0              | -0.733930               | -2.183286 | -2.668451 |
| 9                | 6                | 0              | -3.759750               | 4.570711  | -1.761242 |
| 10               | 6                | 0              | -1.707818               | 0.144527  | -0.522870 |
| 11               | 6                | 0              | -0.597548               | 0.410323  | -1.301109 |
| 12               | 6                | 0              | -0.570348               | 1.589449  | -2.093851 |
| 13               | 6                | 0              | -1.614807               | 2.477513  | -2.009485 |
| 14               | 6                | 0              | -3.786674               | 5.711432  | -0.734653 |
| 15               | 6                | 0              | -4.855305               | 4.737814  | -2.822236 |
| 16               | 6                | 0              | 0.612687                | 1.873845  | -2.980390 |
| 17               | 6                | 0              | -4.421008               | -0.768833 | 0.500725  |
| 18               | 6                | 0              | 4.401167                | 0.811471  | 0.499715  |
| 19               | 6                | 0              | 0.566608                | -0.522734 | -1.274453 |
| 20               | 6                | 0              | 0.507268                | -1.780563 | -1.919697 |
| 21               | 6                | 0              | 1.587480                | -2.622044 | -1.838202 |
| 22               | 6                | 0              | 2.783022                | -2.273679 | -1.152059 |
| 23               | 6                | 0              | 2.882534                | -0.974618 | -0.560238 |
| 24               | 6                | 0              | 1.712851                | -0.154631 | -0.597787 |
| 25               | 6                | 0              | 3.828286                | -4.604949 | -1.653012 |
| 26               | 6                | 0              | 3.892506                | -5.700401 | -0.580160 |
| 27               | 6                | 0              | 3.873491                | -3.210631 | -1.046281 |
| 28               | 6                | 0              | 4.988115                | -2.820754 | -0.348270 |
| 29               | 6                | 0              | 5.111878                | -1.518116 | 0.208032  |
| 30               | 6                | 0              | 4.109554                | -0.571142 | 0.085423  |
| 31               | 1                | 0              | 3.723030                | 1.589711  | 0.187744  |
| 32               | 1                | 0              | 1.501088                | -3.585198 | -2.319288 |
| 33               | 1                | 0              | -3.853642               | -1.567199 | 0.036162  |
| 34               | 1                | 0              | -1.542545               | 3.387619  | -2.587219 |
| 35               | 1                | 0              | 6.722401                | -3.161915 | 0.310214  |
| 36               | 1                | 0              | 4.797477                | -5.778108 | -3.192823 |
| 37               | 1                | 0              | -2.808095               | 4.657645  | -2.279987 |
| 38               | 8                | 0              | 1.737294                | 1.026866  | 0.082745  |
| 39               | 1                | 0              | -3.639682               | 6.667670  | -1.243996 |
| 40               | 1                | 0              | -2.984377               | 5.594486  | -0.001338 |
| 41               | 1                | 0              | -4.736636               | 5.750373  | -0.201233 |
| 42               | 1                | 0              | -4.743756               | 5.703653  | -3.322672 |
| 43               | 1                | 0              | -4.784432               | 3.954273  | -3.581263 |
| 44               | 1                | 0              | -5.849261               | 4.695479  | -2.374745 |
| 45               | 1                | 0              | -0.592627               | -3.147410 | -3.158542 |
| 46               | 1                | 0              | -0.989388               | -1.441625 | -3.430855 |
| 47               | 1                | 0              | -1.590072               | -2.263724 | -1.992458 |
| 48               | 8                | 0              | -5.947430               | 3.741121  | -0.167056 |
| 49               | 1                | 0              | -6.622751               | 3.293372  | 0.361460  |
| 50               | 8                | 0              | -6.234970               | 1.404171  | 0.892205  |
| 51               | 1                | 0              | -6.222829               | 0.481094  | 1.262661  |
| 52               | 1                | 0              | 0.452520                | 2.790898  | -3.548069 |
| 53               | 1                | 0              | 0.780715                | 1.053313  | -3.683457 |
| 54               | 1                | 0              | 1.530204                | 1.989903  | -2.395910 |
| 55               | 8                | 0              | -1.631197               | -0.960729 | 0.276027  |
| 56               | 8                | 0              | 6.291719                | -1.292936 | 0.812105  |
| 57               | 1                | 0              | 4.821102                | -4.037874 | -3.505826 |
| 58               | 1                | 0              | 5.911141                | -4.733584 | -2.295318 |
| 59               | 8                | 0              | 6.049220                | -3.652121 | -0.182557 |
| 60               | 1                | 0              | 2.874419                | -4.732928 | -2.157840 |
| 61               | 1                | 0              | 3.768175                | -6.681895 | -1.046098 |
| 62               | 1                | 0              | 3.092806                | -5.573203 | 0.154355  |



|     |   |   |           |           |           |
|-----|---|---|-----------|-----------|-----------|
| 63  | 1 | 0 | 4.847286  | -5.689426 | -0.054023 |
| 64  | 1 | 0 | 6.271532  | -0.342608 | 1.134836  |
| 65  | 1 | 0 | -2.179778 | -0.836766 | 1.060683  |
| 66  | 1 | 0 | 0.851223  | 1.414538  | 0.055045  |
| 67  | 7 | 0 | -5.425952 | -1.002703 | 1.269446  |
| 68  | 6 | 0 | -5.029728 | -3.384543 | 1.162782  |
| 69  | 6 | 0 | -6.435267 | -2.316335 | 2.887517  |
| 70  | 6 | 0 | -5.754753 | -4.706407 | 1.397945  |
| 71  | 1 | 0 | -4.090929 | -3.341891 | 1.741374  |
| 72  | 1 | 0 | -4.777088 | -3.306099 | 0.103884  |
| 73  | 6 | 0 | -7.197460 | -3.612688 | 3.110997  |
| 74  | 1 | 0 | -5.613819 | -2.236966 | 3.616646  |
| 75  | 1 | 0 | -7.083620 | -1.447609 | 3.010913  |
| 76  | 6 | 0 | -6.298043 | -4.810915 | 2.819761  |
| 77  | 1 | 0 | -5.060438 | -5.521226 | 1.180641  |
| 78  | 1 | 0 | -6.582711 | -4.782324 | 0.685571  |
| 79  | 1 | 0 | -7.559073 | -3.632812 | 4.141723  |
| 80  | 1 | 0 | -8.071180 | -3.635024 | 2.451218  |
| 81  | 1 | 0 | -6.845828 | -5.747194 | 2.948998  |
| 82  | 1 | 0 | -5.463295 | -4.818653 | 3.530529  |
| 83  | 7 | 0 | -5.885606 | -2.256805 | 1.525963  |
| 84  | 7 | 0 | 5.475016  | 1.067120  | 1.161025  |
| 85  | 7 | 0 | 5.875558  | 2.341041  | 1.459294  |
| 86  | 6 | 0 | 4.893883  | 3.410994  | 1.289913  |
| 87  | 6 | 0 | 6.552120  | 2.346386  | 2.763558  |
| 88  | 6 | 0 | 5.533416  | 4.770382  | 1.555678  |
| 89  | 1 | 0 | 4.035262  | 3.241724  | 1.961968  |
| 90  | 1 | 0 | 4.527152  | 3.390216  | 0.262251  |
| 91  | 6 | 0 | 7.230802  | 3.683410  | 3.018683  |
| 92  | 1 | 0 | 5.818092  | 2.144263  | 3.559797  |
| 93  | 1 | 0 | 7.276249  | 1.530032  | 2.754582  |
| 94  | 6 | 0 | 6.214106  | 4.817971  | 2.920116  |
| 95  | 1 | 0 | 4.759240  | 5.536768  | 1.472752  |
| 96  | 1 | 0 | 6.274215  | 4.965720  | 0.773284  |
| 97  | 1 | 0 | 7.699367  | 3.656691  | 4.005269  |
| 98  | 1 | 0 | 8.022922  | 3.831342  | 2.277094  |
| 99  | 1 | 0 | 6.697162  | 5.786248  | 3.070769  |
| 100 | 1 | 0 | 5.461503  | 4.700311  | 3.708628  |

-----

**Structure (R)-13aa enantiomer of (S)-13aa (vacuum)**

Energy (Hartrees): = -2224.3849204  
 No imaginary frequencies

Standard orientation:

| Center<br>Number | Atomic<br>Number | Atomic<br>Type | Coordinates (Angstroms) |           |           |
|------------------|------------------|----------------|-------------------------|-----------|-----------|
|                  |                  |                | X                       | Y         | Z         |
| 1                | 6                | 0              | 5.140635                | -2.545977 | -0.590114 |
| 2                | 6                | 0              | 4.073715                | -2.911759 | -1.367748 |
| 3                | 6                | 0              | 2.922713                | -2.047038 | -1.377163 |
| 4                | 6                | 0              | 2.918321                | -0.828361 | -0.624245 |
| 5                | 6                | 0              | 4.086314                | -0.452619 | 0.138768  |
| 6                | 6                | 0              | 5.153518                | -1.333515 | 0.150127  |
| 7                | 6                | 0              | -4.280764               | 5.432609  | -1.247457 |
| 8                | 6                | 0              | 0.564255                | 2.023249  | -2.979089 |
| 9                | 6                | 0              | 4.156221                | -4.206155 | -2.162747 |
| 10               | 6                | 0              | 1.710858                | -0.066087 | -0.649828 |
| 11               | 6                | 0              | 0.604953                | -0.437668 | -1.394538 |
| 12               | 6                | 0              | 0.636298                | -1.629387 | -2.158993 |
| 13               | 6                | 0              | 1.770144                | -2.396614 | -2.131327 |
| 14               | 6                | 0              | 5.280727                | -4.158623 | -3.207564 |
| 15               | 6                | 0              | 4.280866                | -5.432638 | -1.247305 |
| 16               | 6                | 0              | -0.564218               | -2.023509 | -2.978965 |
| 17               | 6                | 0              | 4.238263                | 0.830753  | 0.843456  |
| 18               | 6                | 0              | -4.238285               | -0.830728 | 0.843460  |
| 19               | 6                | 0              | -0.604937               | 0.437527  | -1.394564 |
| 20               | 6                | 0              | -0.636266               | 1.629200  | -2.159089 |
| 21               | 6                | 0              | -1.770091               | 2.396462  | -2.131445 |
| 22               | 6                | 0              | -2.922656               | 2.046953  | -1.377245 |
| 23               | 6                | 0              | -2.918286               | 0.828308  | -0.624277 |
| 24               | 6                | 0              | -1.710838               | 0.066015  | -0.649810 |
| 25               | 6                | 0              | -4.156088               | 4.206100  | -2.162861 |
| 26               | 6                | 0              | -5.280537               | 4.158549  | -3.207738 |
| 27               | 6                | 0              | -4.073630               | 2.911713  | -1.367840 |
| 28               | 6                | 0              | -5.140566               | 2.545974  | -0.590205 |
| 29               | 6                | 0              | -5.153472               | 1.333534  | 0.150069  |
| 30               | 6                | 0              | -4.086291               | 0.452618  | 0.138742  |
| 31               | 1                | 0              | -3.468851               | -1.572405 | 0.713678  |
| 32               | 1                | 0              | -1.767489               | 3.304110  | -2.715023 |
| 33               | 1                | 0              | 3.468847                | 1.572419  | 0.713576  |
| 34               | 1                | 0              | 1.767554                | -3.304295 | -2.714851 |
| 35               | 1                | 0              | -6.869165               | 2.853898  | 0.081136  |
| 36               | 1                | 0              | -4.262825               | 6.345888  | -1.847922 |
| 37               | 1                | 0              | 3.231015                | -4.333712 | -2.719409 |

|     |   |   |           |           |           |
|-----|---|---|-----------|-----------|-----------|
| 38  | 8 | 0 | -1.637893 | -1.079510 | 0.088708  |
| 39  | 1 | 0 | 5.268159  | -5.072745 | -3.806919 |
| 40  | 1 | 0 | 5.145916  | -3.308410 | -3.879927 |
| 41  | 1 | 0 | 6.256990  | -4.072414 | -2.731780 |
| 42  | 1 | 0 | 4.263009  | -6.345934 | -1.847747 |
| 43  | 1 | 0 | 3.448474  | -5.471830 | -0.541010 |
| 44  | 1 | 0 | 5.212586  | -5.409268 | -0.683272 |
| 45  | 1 | 0 | 0.853327  | 1.216826  | -3.657943 |
| 46  | 1 | 0 | 0.352749  | 2.917063  | -3.566100 |
| 47  | 1 | 0 | 1.428467  | 2.225193  | -2.339407 |
| 48  | 8 | 0 | 6.255617  | -3.314343 | -0.506873 |
| 49  | 1 | 0 | 6.869233  | -2.853854 | 0.081250  |
| 50  | 8 | 0 | 6.296684  | -1.131280 | 0.828200  |
| 51  | 1 | 0 | 6.190466  | -0.270885 | 1.326479  |
| 52  | 1 | 0 | -0.352710 | -2.917381 | -3.565887 |
| 53  | 1 | 0 | -1.428437 | -2.225389 | -2.339275 |
| 54  | 1 | 0 | -0.853280 | -1.217152 | -3.657902 |
| 55  | 8 | 0 | 1.637905  | 1.079504  | 0.088585  |
| 56  | 8 | 0 | -6.296637 | 1.131332  | 0.828161  |
| 57  | 1 | 0 | -3.448424 | 5.471789  | -0.541099 |
| 58  | 1 | 0 | -5.212527 | 5.409291  | -0.683495 |
| 59  | 8 | 0 | -6.255535 | 3.314363  | -0.506989 |
| 60  | 1 | 0 | -3.230847 | 4.333646  | -2.719469 |
| 61  | 1 | 0 | -5.267947 | 5.072662  | -3.807107 |
| 62  | 1 | 0 | -5.145684 | 3.308326  | -3.880082 |
| 63  | 1 | 0 | -6.256823 | 4.072340  | -2.732003 |
| 64  | 1 | 0 | -6.190438 | 0.270961  | 1.326454  |
| 65  | 1 | 0 | 0.737934  | 1.425063  | 0.012599  |
| 66  | 1 | 0 | -0.737927 | -1.425088 | 0.012745  |
| 67  | 7 | 0 | 5.271787  | 1.046410  | 1.578356  |
| 68  | 6 | 0 | 4.577158  | 3.333120  | 1.965027  |
| 69  | 6 | 0 | 6.867264  | 2.534309  | 2.351055  |
| 70  | 6 | 0 | 4.816935  | 4.487831  | 2.934513  |
| 71  | 1 | 0 | 4.744587  | 3.655582  | 0.921534  |
| 72  | 1 | 0 | 3.537386  | 3.012330  | 2.051398  |
| 73  | 6 | 0 | 7.125870  | 3.651109  | 3.351612  |
| 74  | 1 | 0 | 7.226351  | 2.836120  | 1.352652  |
| 75  | 1 | 0 | 7.394600  | 1.622198  | 2.633890  |
| 76  | 6 | 0 | 6.291097  | 4.879053  | 2.995243  |
| 77  | 1 | 0 | 4.197629  | 5.334713  | 2.629981  |
| 78  | 1 | 0 | 4.483162  | 4.178089  | 3.929544  |
| 79  | 1 | 0 | 8.192452  | 3.887462  | 3.356009  |
| 80  | 1 | 0 | 6.857261  | 3.300440  | 4.352862  |
| 81  | 1 | 0 | 6.444010  | 5.678146  | 3.723900  |
| 82  | 1 | 0 | 6.610277  | 5.263935  | 2.019499  |
| 83  | 7 | 0 | 5.441772  | 2.204508  | 2.289061  |
| 84  | 7 | 0 | -5.271836 | -1.046321 | 1.578328  |
| 85  | 7 | 0 | -5.441898 | -2.204382 | 2.289068  |
| 86  | 6 | 0 | -4.577252 | -3.333000 | 1.965164  |
| 87  | 6 | 0 | -6.867393 | -2.534168 | 2.350953  |
| 88  | 6 | 0 | -4.817121 | -4.487686 | 2.934657  |
| 89  | 1 | 0 | -4.744563 | -3.655503 | 0.921663  |
| 90  | 1 | 0 | -3.537486 | -3.012208 | 2.051629  |
| 91  | 6 | 0 | -7.126087 | -3.650928 | 3.351532  |
| 92  | 1 | 0 | -7.226409 | -2.836015 | 1.352533  |
| 93  | 1 | 0 | -7.394743 | -1.622039 | 2.633708  |
| 94  | 6 | 0 | -6.291294 | -4.878894 | 2.995266  |
| 95  | 1 | 0 | -4.197795 | -5.334580 | 2.630198  |
| 96  | 1 | 0 | -4.483434 | -4.177932 | 3.929712  |
| 97  | 1 | 0 | -8.192669 | -3.887268 | 3.355859  |
| 98  | 1 | 0 | -6.857543 | -3.300227 | 4.352789  |
| 99  | 1 | 0 | -6.444277 | -5.677971 | 3.723925  |
| 100 | 1 | 0 | -6.610392 | -5.263793 | 2.019502  |

-----

**Structure (*R*)-13aa enantiomer of (*S*)-13aa (CHCl<sub>3</sub>)**

Energy (Hartrees): = -2224.4282452  
 No imaginary frequencies

Standard orientation:

| Center Number | Atomic Number | Atomic Type | Coordinates (Angstroms) |           |           |
|---------------|---------------|-------------|-------------------------|-----------|-----------|
|               |               |             | X                       | Y         | Z         |
| 1             | 6             | 0           | -5.156420               | 2.526193  | -0.607514 |
| 2             | 6             | 0           | -4.109877               | 2.867708  | -1.424483 |
| 3             | 6             | 0           | -2.946518               | 2.018271  | -1.413580 |
| 4             | 6             | 0           | -2.928310               | 0.814245  | -0.638107 |
| 5             | 6             | 0           | -4.088650               | 0.445043  | 0.141182  |
| 6             | 6             | 0           | -5.154432               | 1.329319  | 0.158961  |
| 7             | 6             | 0           | 4.230686                | -5.390803 | -1.393197 |
| 8             | 6             | 0           | -0.556214               | -2.033755 | -2.972252 |
| 9             | 6             | 0           | -4.211565               | 4.129667  | -2.269321 |
| 10            | 6             | 0           | -1.712006               | 0.063011  | -0.646556 |
| 11            | 6             | 0           | -0.608250               | 0.433778  | -1.394850 |
| 12            | 6             | 0           | -0.646562               | 1.621901  | -2.166779 |

|     |   |   |           |           |           |
|-----|---|---|-----------|-----------|-----------|
| 13  | 6 | 0 | -1.790603 | 2.376222  | -2.160039 |
| 14  | 6 | 0 | -5.407612 | 4.092369  | -3.232000 |
| 15  | 6 | 0 | -4.230485 | 5.390605  | -1.394698 |
| 16  | 6 | 0 | 0.556592  | 2.033196  | -2.972544 |
| 17  | 6 | 0 | -4.244221 | -0.841362 | 0.843642  |
| 18  | 6 | 0 | 4.244137  | 0.841496  | 0.843996  |
| 19  | 6 | 0 | 0.608435  | -0.434056 | -1.394699 |
| 20  | 6 | 0 | 0.646844  | -1.622312 | -2.166416 |
| 21  | 6 | 0 | 1.790892  | -2.376620 | -2.159422 |
| 22  | 6 | 0 | 2.946726  | -2.018525 | -1.412905 |
| 23  | 6 | 0 | 2.928421  | -0.814366 | -0.637644 |
| 24  | 6 | 0 | 1.712105  | -0.063153 | -0.646344 |
| 25  | 6 | 0 | 4.211883  | -4.130071 | -2.268123 |
| 26  | 6 | 0 | 5.408036  | -4.093027 | -3.230679 |
| 27  | 6 | 0 | 4.110113  | -2.867929 | -1.423569 |
| 28  | 6 | 0 | 5.156572  | -2.526247 | -0.606561 |
| 29  | 6 | 0 | 5.154482  | -1.329252 | 0.159722  |
| 30  | 6 | 0 | 4.088675  | -0.445011 | 0.141703  |
| 31  | 1 | 0 | 3.507106  | 1.608542  | 0.674583  |
| 32  | 1 | 0 | 1.787392  | -3.286095 | -2.741387 |
| 33  | 1 | 0 | -3.507205 | -1.608456 | 0.674389  |
| 34  | 1 | 0 | -1.787031 | 3.285597  | -2.742161 |
| 35  | 1 | 0 | 6.877945  | -2.869993 | 0.094043  |
| 36  | 1 | 0 | 4.238182  | -6.285210 | -2.022500 |
| 37  | 1 | 0 | -3.328593 | 4.195605  | -2.900325 |
| 38  | 8 | 0 | 1.641122  | 1.062082  | 0.116667  |
| 39  | 1 | 0 | -5.371182 | 4.961111  | -3.895320 |
| 40  | 1 | 0 | -5.380164 | 3.193764  | -3.853635 |
| 41  | 1 | 0 | -6.356018 | 4.111608  | -2.696290 |
| 42  | 1 | 0 | -4.237915 | 6.284861  | -2.024216 |
| 43  | 1 | 0 | -3.344958 | 5.433528  | -0.755142 |
| 44  | 1 | 0 | -5.116563 | 5.412826  | -0.758419 |
| 45  | 1 | 0 | -0.850916 | -1.243220 | -3.667820 |
| 46  | 1 | 0 | -0.344793 | -2.938216 | -3.543555 |
| 47  | 1 | 0 | -1.416397 | -2.229554 | -2.324774 |
| 48  | 8 | 0 | -6.262625 | 3.305859  | -0.514428 |
| 49  | 1 | 0 | -6.877848 | 2.870110  | 0.092876  |
| 50  | 8 | 0 | -6.283182 | 1.137759  | 0.863527  |
| 51  | 1 | 0 | -6.162766 | 0.283394  | 1.376078  |
| 52  | 1 | 0 | 0.345260  | 2.937592  | -3.543981 |
| 53  | 1 | 0 | 1.416715  | 2.229042  | -2.325000 |
| 54  | 1 | 0 | 0.851335  | 1.242561  | -3.667980 |
| 55  | 8 | 0 | -1.641115 | -1.062087 | 0.116666  |
| 56  | 8 | 0 | 6.283145  | -1.137556 | 0.864388  |
| 57  | 1 | 0 | 3.345083  | -5.433562 | -0.753736 |
| 58  | 1 | 0 | 5.116688  | -5.412879 | -0.756806 |
| 59  | 8 | 0 | 6.262785  | -3.305873 | -0.513231 |
| 60  | 1 | 0 | 3.328983  | -4.196142 | -2.899214 |
| 61  | 1 | 0 | 5.371690  | -4.961962 | -3.893751 |
| 62  | 1 | 0 | 5.380644  | -3.194601 | -3.852575 |
| 63  | 1 | 0 | 6.356385  | -4.112101 | -2.694863 |
| 64  | 1 | 0 | 6.162620  | -0.283138 | 1.376830  |
| 65  | 1 | 0 | -0.739066 | -1.411100 | 0.075952  |
| 66  | 1 | 0 | 0.739064  | 1.411057  | 0.075833  |
| 67  | 7 | 0 | -5.253079 | -1.026591 | 1.620324  |
| 68  | 6 | 0 | -4.652631 | -3.347887 | 1.955836  |
| 69  | 6 | 0 | -6.884294 | -2.440296 | 2.455086  |
| 70  | 6 | 0 | -4.905272 | -4.497138 | 2.927878  |
| 71  | 1 | 0 | -4.889648 | -3.648425 | 0.920473  |
| 72  | 1 | 0 | -3.594806 | -3.082118 | 1.995069  |
| 73  | 6 | 0 | -7.151489 | -3.554630 | 3.455221  |
| 74  | 1 | 0 | -7.297803 | -2.713375 | 1.470547  |
| 75  | 1 | 0 | -7.354099 | -1.507526 | 2.771545  |
| 76  | 6 | 0 | -6.392285 | -4.817068 | 3.054881  |
| 77  | 1 | 0 | -4.342666 | -5.369320 | 2.586618  |
| 78  | 1 | 0 | -4.509476 | -4.214810 | 3.908709  |
| 79  | 1 | 0 | -8.227429 | -3.739139 | 3.499092  |
| 80  | 1 | 0 | -6.827899 | -3.227810 | 4.448862  |
| 81  | 1 | 0 | -6.548653 | -5.611633 | 3.788233  |
| 82  | 1 | 0 | -6.772829 | -5.180504 | 2.092911  |
| 83  | 7 | 0 | -5.445270 | -2.178863 | 2.329832  |
| 84  | 7 | 0 | 5.252924  | 1.026875  | 1.620734  |
| 85  | 7 | 0 | 5.444977  | 2.179253  | 2.330103  |
| 86  | 6 | 0 | 4.652255  | 3.348156  | 1.955911  |
| 87  | 6 | 0 | 6.883969  | 2.440833  | 2.455415  |
| 88  | 6 | 0 | 4.904714  | 4.497539  | 2.927844  |
| 89  | 1 | 0 | 4.889326  | 3.648603  | 0.920534  |
| 90  | 1 | 0 | 3.594453  | 3.082286  | 1.995088  |
| 91  | 6 | 0 | 7.150999  | 3.555315  | 3.455428  |
| 92  | 1 | 0 | 7.297514  | 2.713823  | 1.470866  |
| 93  | 1 | 0 | 7.353839  | 1.508145  | 2.772021  |
| 94  | 6 | 0 | 6.391688  | 4.817630  | 3.054906  |
| 95  | 1 | 0 | 4.342047  | 5.369630  | 2.586448  |
| 96  | 1 | 0 | 4.508879  | 4.215280  | 3.908679  |
| 97  | 1 | 0 | 8.226918  | 3.739941  | 3.499330  |
| 98  | 1 | 0 | 6.827397  | 3.228578  | 4.449093  |
| 99  | 1 | 0 | 6.547933  | 5.612286  | 3.788185  |
| 100 | 1 | 0 | 6.772252  | 5.181008  | 2.092922  |

-----  
**Structure (R)-13aa enantiomer of (S)-13aa (DMSO)**

Energy (Hartrees): = -2224.4174604  
 No imaginary frequencies

Standard orientation:

| Center<br>Number | Atomic<br>Number | Atomic<br>Type | Coordinates (Angstroms) |           |           |
|------------------|------------------|----------------|-------------------------|-----------|-----------|
|                  |                  |                | X                       | Y         | Z         |
| 1                | 6                | 0              | -5.157848               | 2.507348  | -0.599793 |
| 2                | 6                | 0              | -4.124147               | 2.845784  | -1.434568 |
| 3                | 6                | 0              | -2.957242               | 2.000373  | -1.431917 |
| 4                | 6                | 0              | -2.923057               | 0.804880  | -0.643400 |
| 5                | 6                | 0              | -4.073467               | 0.434020  | 0.149812  |
| 6                | 6                | 0              | -5.143051               | 1.314176  | 0.173216  |
| 7                | 6                | 0              | 4.238594                | -5.367129 | -1.420511 |
| 8                | 6                | 0              | -0.519325               | -2.007382 | -3.047280 |
| 9                | 6                | 0              | -4.238381               | 4.101321  | -2.286789 |
| 10               | 6                | 0              | -1.701191               | 0.062534  | -0.654783 |
| 11               | 6                | 0              | -0.611746               | 0.429103  | -1.425740 |
| 12               | 6                | 0              | -0.668497               | 1.603608  | -2.216571 |
| 13               | 6                | 0              | -1.815071               | 2.354444  | -2.201442 |
| 14               | 6                | 0              | -5.450979               | 4.060904  | -3.227359 |
| 15               | 6                | 0              | -4.238564               | 5.367165  | -1.420160 |
| 16               | 6                | 0              | 0.519309                | 2.007489  | -3.047188 |
| 17               | 6                | 0              | -4.217554               | -0.850343 | 0.859992  |
| 18               | 6                | 0              | 4.217566                | 0.850280  | 0.859948  |
| 19               | 6                | 0              | 0.611755                | -0.429077 | -1.425771 |
| 20               | 6                | 0              | 0.668495                | -1.603542 | -2.216662 |
| 21               | 6                | 0              | 1.815070                | -2.354378 | -2.201592 |
| 22               | 6                | 0              | 2.957254                | -2.000343 | -1.432070 |
| 23               | 6                | 0              | 2.923079                | -0.804891 | -0.643489 |
| 24               | 6                | 0              | 1.701213                | -0.062546 | -0.654814 |
| 25               | 6                | 0              | 4.238391                | -4.101238 | -2.287072 |
| 26               | 6                | 0              | 5.450973                | -4.060764 | -3.227658 |
| 27               | 6                | 0              | 4.124163                | -2.845747 | -1.434782 |
| 28               | 6                | 0              | 5.157874                | -2.507350 | -0.600004 |
| 29               | 6                | 0              | 5.143084                | -1.314220 | 0.173070  |
| 30               | 6                | 0              | 4.073496                | -0.434063 | 0.149724  |
| 31               | 1                | 0              | 3.479561                | 1.617163  | 0.691722  |
| 32               | 1                | 0              | 1.823554                | -3.255656 | -2.796268 |
| 33               | 1                | 0              | -3.479577               | -1.617244 | 0.691730  |
| 34               | 1                | 0              | -1.823563               | 3.255753  | -2.796072 |
| 35               | 1                | 0              | 6.866593                | -2.838640 | 0.123201  |
| 36               | 1                | 0              | 4.255874                | -6.256889 | -2.056062 |
| 37               | 1                | 0              | -3.366939               | 4.162574  | -2.933689 |
| 38               | 8                | 0              | 1.609160                | 1.043751  | 0.130894  |
| 39               | 1                | 0              | -5.420762               | 4.923332  | -3.899005 |
| 40               | 1                | 0              | -5.438156               | 3.157033  | -3.842221 |
| 41               | 1                | 0              | -6.390596               | 4.089660  | -2.676528 |
| 42               | 1                | 0              | -4.255843               | 6.256960  | -2.055662 |
| 43               | 1                | 0              | -3.339931               | 5.413294  | -0.799117 |
| 44               | 1                | 0              | -5.112183               | 5.396009  | -0.766774 |
| 45               | 1                | 0              | -0.812944               | -1.202600 | -3.727074 |
| 46               | 1                | 0              | -0.290677               | -2.895333 | -3.637442 |
| 47               | 1                | 0              | -1.385751               | -2.229668 | -2.416758 |
| 48               | 8                | 0              | -6.266983               | 3.281043  | -0.494235 |
| 49               | 1                | 0              | -6.866558               | 2.838606  | 0.123450  |
| 50               | 8                | 0              | -6.263417               | 1.121089  | 0.888942  |
| 51               | 1                | 0              | -6.133675               | 0.263641  | 1.398301  |
| 52               | 1                | 0              | 0.290651                | 2.895468  | -3.637304 |
| 53               | 1                | 0              | 1.385744                | 2.229748  | -2.416668 |
| 54               | 1                | 0              | 0.812920                | 1.202741  | -3.727025 |
| 55               | 8                | 0              | -1.609119               | -1.043804 | 0.130865  |
| 56               | 8                | 0              | 6.263456                | -1.121188 | 0.888800  |
| 57               | 1                | 0              | 3.339968                | -5.413299 | -0.799461 |
| 58               | 1                | 0              | 5.112220                | -5.396000 | -0.767137 |
| 59               | 8                | 0              | 6.267011                | -3.281048 | -0.494499 |
| 60               | 1                | 0              | 3.366939                | -4.162461 | -2.933962 |
| 61               | 1                | 0              | 5.420745                | -4.923150 | -3.899357 |
| 62               | 1                | 0              | 5.438142                | -3.156855 | -3.842464 |
| 63               | 1                | 0              | 6.390599                | -4.089555 | -2.676843 |
| 64               | 1                | 0              | 6.133715                | -0.263783 | 1.398234  |
| 65               | 1                | 0              | -0.715090               | -1.407269 | 0.049085  |
| 66               | 1                | 0              | 0.715131                | 1.407225  | 0.049150  |
| 67               | 7                | 0              | -5.222813               | -1.032231 | 1.642802  |
| 68               | 6                | 0              | -4.623665               | -3.351128 | 1.986417  |
| 69               | 6                | 0              | -6.857355               | -2.438601 | 2.480464  |
| 70               | 6                | 0              | -4.885034               | -4.501988 | 2.953793  |
| 71               | 1                | 0              | -4.857490               | -3.647402 | 0.949759  |
| 72               | 1                | 0              | -3.565343               | -3.088729 | 2.032212  |
| 73               | 6                | 0              | -7.129601               | -3.555734 | 3.475516  |
| 74               | 1                | 0              | -7.266477               | -2.709288 | 1.494018  |
| 75               | 1                | 0              | -7.326893               | -1.506042 | 2.798502  |

|     |   |   |           |           |          |
|-----|---|---|-----------|-----------|----------|
| 76  | 6 | 0 | -6.373117 | -4.818191 | 3.072042 |
| 77  | 1 | 0 | -4.323006 | -5.373753 | 2.610844 |
| 78  | 1 | 0 | -4.493183 | -4.226028 | 3.938245 |
| 79  | 1 | 0 | -8.206370 | -3.736110 | 3.514467 |
| 80  | 1 | 0 | -6.809033 | -3.234803 | 4.472247 |
| 81  | 1 | 0 | -6.535003 | -5.616100 | 3.800588 |
| 82  | 1 | 0 | -6.749892 | -5.174601 | 2.106122 |
| 83  | 7 | 0 | -5.415807 | -2.179598 | 2.358255 |
| 84  | 7 | 0 | 5.222837  | 1.032188  | 1.642739 |
| 85  | 7 | 0 | 5.415803  | 2.179548  | 2.358212 |
| 86  | 6 | 0 | 4.623604  | 3.351053  | 1.986418 |
| 87  | 6 | 0 | 6.857343  | 2.438608  | 2.480389 |
| 88  | 6 | 0 | 4.884952  | 4.501906  | 2.953809 |
| 89  | 1 | 0 | 4.857391  | 3.647357  | 0.949759 |
| 90  | 1 | 0 | 3.565294  | 3.088612  | 2.032235 |
| 91  | 6 | 0 | 7.129570  | 3.555732  | 3.475456 |
| 92  | 1 | 0 | 7.266429  | 2.709331  | 1.493937 |
| 93  | 1 | 0 | 7.326929  | 1.506061  | 2.798396 |
| 94  | 6 | 0 | 6.373025  | 4.818166  | 3.072025 |
| 95  | 1 | 0 | 4.322879  | 5.373654  | 2.610892 |
| 96  | 1 | 0 | 4.493138  | 4.225910  | 3.938266 |
| 97  | 1 | 0 | 8.206333  | 3.736150  | 3.514384 |
| 98  | 1 | 0 | 6.809039  | 3.234768  | 4.472189 |
| 99  | 1 | 0 | 6.534898  | 5.616069  | 3.800582 |
| 100 | 1 | 0 | 6.749761  | 5.174608  | 2.106102 |

### Structure 13cc (vacuum)

Energy (Hartrees): = -2224.3843705  
 No imaginary frequencies

Standard orientation:

| Center<br>Number | Atomic<br>Number | Atomic<br>Type | Coordinates (Angstroms) |           |           |
|------------------|------------------|----------------|-------------------------|-----------|-----------|
|                  |                  |                | X                       | Y         | Z         |
| 1                | 6                | 0              | -5.549155               | -1.164974 | 1.556861  |
| 2                | 6                | 0              | -4.527650               | -1.878100 | 2.126709  |
| 3                | 6                | 0              | -3.222226               | -1.774103 | 1.528373  |
| 4                | 6                | 0              | -2.997910               | -0.904535 | 0.413036  |
| 5                | 6                | 0              | -4.082823               | -0.100662 | -0.098609 |
| 6                | 6                | 0              | -5.332289               | -0.276691 | 0.469082  |
| 7                | 6                | 0              | 5.756508                | -3.923713 | -2.952421 |
| 8                | 6                | 0              | -0.236318               | -3.362342 | -2.018081 |
| 9                | 6                | 0              | -4.827664               | -2.760965 | 3.328062  |
| 10               | 6                | 0              | -1.693163               | -0.928391 | -0.165616 |
| 11               | 6                | 0              | -0.662564               | -1.697599 | 0.344589  |
| 12               | 6                | 0              | -0.888125               | -2.520452 | 1.474863  |
| 13               | 6                | 0              | -2.140290               | -2.547285 | 2.028638  |
| 14               | 6                | 0              | -5.376816               | -1.956538 | 4.515679  |
| 15               | 6                | 0              | -5.756617               | -3.923982 | 2.951954  |
| 16               | 6                | 0              | 0.236285                | -3.362591 | 2.017709  |
| 17               | 6                | 0              | -3.922507               | 0.947384  | -1.118511 |
| 18               | 6                | 0              | 3.922526                | 0.947214  | 1.118647  |
| 19               | 6                | 0              | 0.662553                | -1.697565 | -0.344760 |
| 20               | 6                | 0              | 0.888102                | -2.520280 | -1.475136 |
| 21               | 6                | 0              | 2.140264                | -2.547056 | -2.028919 |
| 22               | 6                | 0              | 3.222210                | -1.773946 | -1.528564 |
| 23               | 6                | 0              | 2.997906                | -0.904515 | -0.413116 |
| 24               | 6                | 0              | 1.693161                | -0.928429 | 0.165537  |
| 25               | 6                | 0              | 4.827634                | -2.760588 | -3.328389 |
| 26               | 6                | 0              | 5.376873                | -1.956014 | -4.515866 |
| 27               | 6                | 0              | 4.527630                | -1.877877 | -2.126921 |
| 28               | 6                | 0              | 5.549140                | -1.164817 | -1.557000 |
| 29               | 6                | 0              | 5.332287                | -0.276669 | -0.469108 |
| 30               | 6                | 0              | 4.082828                | -0.100709 | 0.098619  |
| 31               | 1                | 0              | 2.922637                | 1.192203  | 1.436088  |
| 32               | 1                | 0              | 2.296720                | -3.207245 | -2.868036 |
| 33               | 1                | 0              | -2.922612               | 1.192424  | -1.435893 |
| 34               | 1                | 0              | -2.296755               | -3.207578 | 2.867671  |
| 35               | 1                | 0              | 7.354519                | -0.644397 | -1.490068 |
| 36               | 1                | 0              | 5.906837                | -4.576277 | -3.816379 |
| 37               | 1                | 0              | -3.896893               | -3.203660 | 3.674595  |
| 38               | 8                | 0              | 1.458904                | -0.191740 | 1.290578  |
| 39               | 1                | 0              | -5.478034               | -2.610732 | 5.385588  |
| 40               | 1                | 0              | -4.696227               | -1.143794 | 4.779031  |
| 41               | 1                | 0              | -6.353366               | -1.530965 | 4.289427  |
| 42               | 1                | 0              | -5.906961               | -4.576661 | 3.815822  |
| 43               | 1                | 0              | -5.321763               | -4.518265 | 2.145126  |
| 44               | 1                | 0              | -6.728971               | -3.555087 | 2.625202  |
| 45               | 1                | 0              | -1.075544               | -2.739428 | -2.340880 |
| 46               | 1                | 0              | 0.099853                | -3.955394 | -2.868599 |
| 47               | 1                | 0              | -0.623062               | -4.038926 | -1.250911 |
| 48               | 8                | 0              | -6.819523               | -1.245631 | 2.025649  |
| 49               | 1                | 0              | -7.354539               | -0.644570 | 1.489950  |
| 50               | 8                | 0              | -6.440733               | 0.377751  | 0.080381  |

|     |   |   |           |           |           |
|-----|---|---|-----------|-----------|-----------|
| 51  | 1 | 0 | -6.178655 | 0.961956  | -0.686579 |
| 52  | 1 | 0 | -0.099895 | -3.955745 | 2.868152  |
| 53  | 1 | 0 | 0.623026  | -4.039084 | 1.250456  |
| 54  | 1 | 0 | 1.075516  | -2.739724 | 2.340588  |
| 55  | 8 | 0 | -1.458898 | -0.191569 | -1.290568 |
| 56  | 8 | 0 | 6.440737  | 0.377717  | -0.080330 |
| 57  | 1 | 0 | 5.321596  | -4.518086 | -2.145692 |
| 58  | 1 | 0 | 6.728875  | -3.554924 | -2.625590 |
| 59  | 8 | 0 | 6.819498  | -1.245400 | -2.025828 |
| 60  | 1 | 0 | 3.896851  | -3.203183 | -3.675016 |
| 61  | 1 | 0 | 5.478102  | -2.610088 | -5.385865 |
| 62  | 1 | 0 | 4.696333  | -1.143202 | -4.779130 |
| 63  | 1 | 0 | 6.353433  | -1.530519 | -4.289507 |
| 64  | 1 | 0 | 6.178672  | 0.961805  | 0.686724  |
| 65  | 1 | 0 | -0.533978 | -0.321328 | -1.541202 |
| 66  | 1 | 0 | 0.533983  | -0.321520 | 1.541196  |
| 67  | 7 | 0 | -4.954622 | 1.554641  | -1.587843 |
| 68  | 6 | 0 | -3.545868 | 3.062939  | -2.850588 |
| 69  | 6 | 0 | -5.898732 | 3.531846  | -2.325250 |
| 70  | 6 | 0 | -3.614639 | 4.036883  | -4.024836 |
| 71  | 1 | 0 | -3.129112 | 3.558339  | -1.954937 |
| 72  | 1 | 0 | -2.881650 | 2.237626  | -3.114125 |
| 73  | 6 | 0 | -6.010861 | 4.479583  | -3.510303 |
| 74  | 1 | 0 | -5.663970 | 4.102883  | -1.411094 |
| 75  | 1 | 0 | -6.836231 | 3.000464  | -2.155694 |
| 76  | 6 | 0 | -4.657256 | 5.126928  | -3.793361 |
| 77  | 1 | 0 | -2.622679 | 4.467683  | -4.179872 |
| 78  | 1 | 0 | -3.873228 | 3.473547  | -4.926612 |
| 79  | 1 | 0 | -6.771389 | 5.233840  | -3.295345 |
| 80  | 1 | 0 | -6.340123 | 3.914558  | -4.387969 |
| 81  | 1 | 0 | -4.715245 | 5.789650  | -4.659566 |
| 82  | 1 | 0 | -4.361920 | 5.741004  | -2.934318 |
| 83  | 7 | 0 | -4.866364 | 2.519303  | -2.556839 |
| 84  | 7 | 0 | 4.954645  | 1.554448  | 1.588002  |
| 85  | 7 | 0 | 4.866404  | 2.519003  | 2.557106  |
| 86  | 6 | 0 | 3.545907  | 3.062569  | 2.850975  |
| 87  | 6 | 0 | 5.898733  | 3.531599  | 2.325580  |
| 88  | 6 | 0 | 3.614703  | 4.036389  | 4.025325  |
| 89  | 1 | 0 | 3.129095  | 3.558053  | 1.955397  |
| 90  | 1 | 0 | 2.881723  | 2.237209  | 3.114455  |
| 91  | 6 | 0 | 6.010890  | 4.479211  | 3.510730  |
| 92  | 1 | 0 | 5.663915  | 4.102728  | 1.411496  |
| 93  | 1 | 0 | 6.836239  | 3.000261  | 2.155925  |
| 94  | 6 | 0 | 4.657280  | 5.126488  | 3.793919  |
| 95  | 1 | 0 | 2.622738  | 4.467145  | 4.180453  |
| 96  | 1 | 0 | 3.873350  | 3.472964  | 4.927028  |
| 97  | 1 | 0 | 6.771388  | 5.233513  | 3.295819  |
| 98  | 1 | 0 | 6.340207  | 3.914101  | 4.388321  |
| 99  | 1 | 0 | 4.715289  | 5.789119  | 4.660192  |
| 100 | 1 | 0 | 4.361888  | 5.740647  | 2.934954  |

### Structure 13cc (CHCl<sub>3</sub>)

Energy (Hartrees): = -2224.4274525  
No imaginary frequencies

Standard orientation:

| Center<br>Number | Atomic<br>Number | Atomic<br>Type | Coordinates (Angstroms) |           |           |
|------------------|------------------|----------------|-------------------------|-----------|-----------|
|                  |                  |                | X                       | Y         | Z         |
| 1                | 6                | 0              | -5.607955               | -1.246247 | 1.316995  |
| 2                | 6                | 0              | -4.624190               | -1.990796 | 1.915397  |
| 3                | 6                | 0              | -3.287157               | -1.879539 | 1.390156  |
| 4                | 6                | 0              | -2.995883               | -0.962082 | 0.330732  |
| 5                | 6                | 0              | -4.038144               | -0.107349 | -0.186758 |
| 6                | 6                | 0              | -5.321831               | -0.303013 | 0.292563  |
| 7                | 6                | 0              | 5.872361                | -4.083300 | -2.569254 |
| 8                | 6                | 0              | -0.126482               | -3.530602 | -1.970194 |
| 9                | 6                | 0              | -4.992994               | -2.924403 | 3.059077  |
| 10               | 6                | 0              | -1.671624               | -0.993229 | -0.204703 |
| 11               | 6                | 0              | -0.676115               | -1.798832 | 0.317383  |
| 12               | 6                | 0              | -0.962677               | -2.658531 | 1.406498  |
| 13               | 6                | 0              | -2.239609               | -2.692692 | 1.903394  |
| 14               | 6                | 0              | -5.638463               | -2.182910 | 4.238820  |
| 15               | 6                | 0              | -5.872287               | -4.082984 | 2.569876  |
| 16               | 6                | 0              | 0.126526                | -3.530383 | 1.970566  |
| 17               | 6                | 0              | -3.801562               | 1.018748  | -1.106620 |
| 18               | 6                | 0              | 3.801528                | 1.018936  | 1.106475  |
| 19               | 6                | 0              | 0.676129                | -1.798860 | -0.317196 |
| 20               | 6                | 0              | 0.962710                | -2.658682 | -1.406208 |
| 21               | 6                | 0              | 2.239652                | -2.692904 | -1.903076 |
| 22               | 6                | 0              | 3.287191                | -1.879694 | -1.389911 |
| 23               | 6                | 0              | 2.995892                | -0.962101 | -0.330612 |
| 24               | 6                | 0              | 1.671627                | -0.993191 | 0.204809  |
| 25               | 6                | 0              | 4.993074                | -2.924792 | -3.058638 |

|     |   |   |           |           |           |
|-----|---|---|-----------|-----------|-----------|
| 26  | 6 | 0 | 5.638568  | -2.183463 | -4.238471 |
| 27  | 6 | 0 | 4.624239  | -1.991025 | -1.915098 |
| 28  | 6 | 0 | 5.607989  | -1.246397 | -1.316770 |
| 29  | 6 | 0 | 5.321838  | -0.303022 | -0.292475 |
| 30  | 6 | 0 | 4.038139  | -0.107296 | 0.186786  |
| 31  | 1 | 0 | 2.781916  | 1.303071  | 1.312954  |
| 32  | 1 | 0 | 2.439904  | -3.387107 | -2.705324 |
| 33  | 1 | 0 | -2.781956 | 1.302845  | -1.313180 |
| 34  | 1 | 0 | -2.439847 | -3.386801 | 2.705727  |
| 35  | 1 | 0 | 7.414482  | -0.707648 | -1.187103 |
| 36  | 1 | 0 | 6.076724  | -4.774398 | -3.391725 |
| 37  | 1 | 0 | -4.080805 | -3.365882 | 3.453154  |
| 38  | 8 | 0 | 1.400323  | -0.227606 | 1.297235  |
| 39  | 1 | 0 | -5.770037 | -2.873832 | 5.076041  |
| 40  | 1 | 0 | -5.002425 | -1.360923 | 4.577088  |
| 41  | 1 | 0 | -6.614310 | -1.777381 | 3.973930  |
| 42  | 1 | 0 | -6.076632 | -4.773965 | 3.392450  |
| 43  | 1 | 0 | -5.371492 | -4.640100 | 1.773824  |
| 44  | 1 | 0 | -6.825504 | -3.715766 | 2.186051  |
| 45  | 1 | 0 | -0.962892 | -2.926822 | -2.335334 |
| 46  | 1 | 0 | 0.248627  | -4.133569 | -2.797627 |
| 47  | 1 | 0 | -0.529888 | -4.201643 | -1.205894 |
| 48  | 8 | 0 | -6.903963 | -1.345449 | 1.706454  |
| 49  | 1 | 0 | -7.414452 | -0.707520 | 1.187300  |
| 50  | 8 | 0 | -6.397104 | 0.388267  | -0.124035 |
| 51  | 1 | 0 | -6.078353 | 1.013605  | -0.840560 |
| 52  | 1 | 0 | -0.248578 | -4.133285 | 2.798049  |
| 53  | 1 | 0 | 0.529948  | -4.201485 | 1.206326  |
| 54  | 1 | 0 | 0.962923  | -2.926557 | 2.335659  |
| 55  | 8 | 0 | -1.400334 | -0.227768 | -1.297219 |
| 56  | 8 | 0 | 6.397097  | 0.388324  | 0.124049  |
| 57  | 1 | 0 | 5.371551  | -4.640304 | -1.773132 |
| 58  | 1 | 0 | 6.825569  | -3.716025 | -2.185462 |
| 59  | 8 | 0 | 6.904008  | -1.345652 | -1.706180 |
| 60  | 1 | 0 | 4.080896  | -3.366332 | -3.452672 |
| 61  | 1 | 0 | 5.770165  | -2.874502 | -5.075591 |
| 62  | 1 | 0 | 5.002534  | -1.361526 | -4.576870 |
| 63  | 1 | 0 | 6.614407  | -1.777892 | -3.973614 |
| 64  | 1 | 0 | 6.078324  | 1.013772  | 0.840466  |
| 65  | 1 | 0 | -0.474698 | -0.361399 | -1.548200 |
| 66  | 1 | 0 | 0.474686  | -0.361216 | 1.548224  |
| 67  | 7 | 0 | -4.802767 | 1.649087  | -1.611115 |
| 68  | 6 | 0 | -3.345181 | 3.310788  | -2.592387 |
| 69  | 6 | 0 | -5.761290 | 3.650214  | -2.256287 |
| 70  | 6 | 0 | -3.345625 | 4.395653  | -3.666061 |
| 71  | 1 | 0 | -3.036724 | 3.726221  | -1.617175 |
| 72  | 1 | 0 | -2.625941 | 2.538741  | -2.871845 |
| 73  | 6 | 0 | -5.795234 | 4.709685  | -3.346785 |
| 74  | 1 | 0 | -5.638725 | 4.129909  | -1.271666 |
| 75  | 1 | 0 | -6.688331 | 3.074858  | -2.237812 |
| 76  | 6 | 0 | -4.448621 | 5.423460  | -3.430816 |
| 77  | 1 | 0 | -2.361249 | 4.869445  | -3.678148 |
| 78  | 1 | 0 | -3.493480 | 3.921076  | -4.641359 |
| 79  | 1 | 0 | -6.602621 | 5.413155  | -3.130723 |
| 80  | 1 | 0 | -6.018743 | 4.229530  | -4.304986 |
| 81  | 1 | 0 | -4.453120 | 6.167038  | -4.231253 |
| 82  | 1 | 0 | -4.260189 | 5.955834  | -2.491004 |
| 83  | 7 | 0 | -4.666488 | 2.697399  | -2.478495 |
| 84  | 7 | 0 | 4.802719  | 1.649336  | 1.610922  |
| 85  | 7 | 0 | 4.666416  | 2.697780  | 2.478139  |
| 86  | 6 | 0 | 3.345112  | 3.311205  | 2.591876  |
| 87  | 6 | 0 | 5.761239  | 3.650548  | 2.255828  |
| 88  | 6 | 0 | 3.345522  | 4.396240  | 3.665378  |
| 89  | 1 | 0 | 3.036702  | 3.726486  | 1.616586  |
| 90  | 1 | 0 | 2.625850  | 2.539210  | 2.871425  |
| 91  | 6 | 0 | 5.795148  | 4.710192  | 3.346158  |
| 92  | 1 | 0 | 5.638721  | 4.130088  | 1.271126  |
| 93  | 1 | 0 | 6.688274  | 3.075179  | 2.237484  |
| 94  | 6 | 0 | 4.448541  | 5.423997  | 3.430016  |
| 95  | 1 | 0 | 2.361151  | 4.870046  | 3.677345  |
| 96  | 1 | 0 | 3.493328  | 3.921818  | 4.640758  |
| 97  | 1 | 0 | 6.602553  | 5.413618  | 3.130020  |
| 98  | 1 | 0 | 6.018610  | 4.230187  | 4.304446  |
| 99  | 1 | 0 | 4.453012  | 6.167703  | 4.230334  |
| 100 | 1 | 0 | 4.260157  | 5.956222  | 2.490110  |

### Structure 13cc (DMSO)

Energy (Hartrees): = -2224.4171088  
No imaginary frequencies

Standard orientation:

| Center<br>Number | Atomic<br>Number | Atomic<br>Type | Coordinates (Angstroms) |   |   |
|------------------|------------------|----------------|-------------------------|---|---|
|                  |                  |                | X                       | Y | Z |

|    |   |   |           |           |           |
|----|---|---|-----------|-----------|-----------|
| 1  | 6 | 0 | -5.620825 | -1.258819 | 1.241149  |
| 2  | 6 | 0 | -4.653829 | -2.023763 | 1.842145  |
| 3  | 6 | 0 | -3.307637 | -1.916877 | 1.339596  |
| 4  | 6 | 0 | -2.991190 | -0.982775 | 0.302156  |
| 5  | 6 | 0 | -4.015818 | -0.107507 | -0.215518 |
| 6  | 6 | 0 | -5.309366 | -0.299733 | 0.238600  |
| 7  | 6 | 0 | 5.935278  | -4.110527 | -2.445729 |
| 8  | 6 | 0 | -0.077805 | -3.616021 | -1.935594 |
| 9  | 6 | 0 | -5.047767 | -2.972151 | 2.964702  |
| 10 | 6 | 0 | -1.659893 | -1.017263 | -0.215876 |
| 11 | 6 | 0 | -0.681118 | -1.843416 | 0.306216  |
| 12 | 6 | 0 | -0.992776 | -2.721007 | 1.373813  |
| 13 | 6 | 0 | -2.276625 | -2.751219 | 1.853360  |
| 14 | 6 | 0 | -5.698141 | -2.241575 | 4.147872  |
| 15 | 6 | 0 | -5.935287 | -4.110535 | 2.445718  |
| 16 | 6 | 0 | 0.077840  | -3.616033 | 1.935560  |
| 17 | 6 | 0 | -3.751203 | 1.041146  | -1.099926 |
| 18 | 6 | 0 | 3.751197  | 1.041160  | 1.099926  |
| 19 | 6 | 0 | 0.681142  | -1.843410 | -0.306238 |
| 20 | 6 | 0 | 0.992806  | -2.720993 | -1.373840 |
| 21 | 6 | 0 | 2.276656  | -2.751195 | -1.853383 |
| 22 | 6 | 0 | 3.307663  | -1.916852 | -1.339614 |
| 23 | 6 | 0 | 2.991209  | -0.982756 | -0.302171 |
| 24 | 6 | 0 | 1.659912  | -1.017254 | 0.215858  |
| 25 | 6 | 0 | 5.047810  | -2.972106 | -2.964720 |
| 26 | 6 | 0 | 5.698250  | -2.241518 | -4.147846 |
| 27 | 6 | 0 | 4.653858  | -2.023729 | -1.842157 |
| 28 | 6 | 0 | 5.620847  | -1.258776 | -1.241160 |
| 29 | 6 | 0 | 5.309379  | -0.299696 | -0.238609 |
| 30 | 6 | 0 | 4.015828  | -0.107485 | 0.215510  |
| 31 | 1 | 0 | 2.726520  | 1.334010  | 1.267120  |
| 32 | 1 | 0 | 2.493383  | -3.456106 | -2.642259 |
| 33 | 1 | 0 | -2.726531 | 1.334013  | -1.267119 |
| 34 | 1 | 0 | -2.493346 | -3.456134 | 2.642231  |
| 35 | 1 | 0 | 7.414757  | -0.698999 | -1.083978 |
| 36 | 1 | 0 | 6.160192  | -4.810138 | -3.255454 |
| 37 | 1 | 0 | -4.146942 | -3.432740 | 3.362323  |
| 38 | 8 | 0 | 1.367393  | -0.235805 | 1.289767  |
| 39 | 1 | 0 | -5.852319 | -2.945623 | 4.970141  |
| 40 | 1 | 0 | -5.053420 | -1.436951 | 4.510979  |
| 41 | 1 | 0 | -6.663599 | -1.815219 | 3.876928  |
| 42 | 1 | 0 | -6.160194 | -4.810157 | 3.255435  |
| 43 | 1 | 0 | -5.430000 | -4.664389 | 1.649914  |
| 44 | 1 | 0 | -6.878067 | -3.725950 | 2.052906  |
| 45 | 1 | 0 | -0.920413 | -3.029625 | -2.314772 |
| 46 | 1 | 0 | 0.314894  | -4.221947 | -2.752567 |
| 47 | 1 | 0 | -0.474044 | -4.284959 | -1.165205 |
| 48 | 8 | 0 | -6.924128 | -1.349104 | 1.606604  |
| 49 | 1 | 0 | -7.414745 | -0.699072 | 1.083951  |
| 50 | 8 | 0 | -6.370204 | 0.410403  | -0.181279 |
| 51 | 1 | 0 | -6.029995 | 1.045805  | -0.880845 |
| 52 | 1 | 0 | -0.314854 | -4.221968 | 2.752528  |
| 53 | 1 | 0 | 0.474081  | -4.284962 | 1.165164  |
| 54 | 1 | 0 | 0.920447  | -3.029637 | 2.314741  |
| 55 | 8 | 0 | -1.367380 | -0.235812 | -1.289782 |
| 56 | 8 | 0 | 6.370211  | 0.410449  | 0.181269  |
| 57 | 1 | 0 | 5.429946  | -4.664382 | -1.649955 |
| 58 | 1 | 0 | 6.878056  | -3.725979 | -2.052876 |
| 59 | 8 | 0 | 6.924149  | -1.349039 | -1.606627 |
| 60 | 1 | 0 | 4.146987  | -3.432660 | -3.362384 |
| 61 | 1 | 0 | 5.852451  | -2.945551 | -4.970122 |
| 62 | 1 | 0 | 5.053562  | -1.436872 | -4.510965 |
| 63 | 1 | 0 | 6.663705  | -1.815187 | -3.876850 |
| 64 | 1 | 0 | 6.029998  | 1.045849  | 0.880835  |
| 65 | 1 | 0 | -0.443387 | -0.386967 | -1.538033 |
| 66 | 1 | 0 | 0.443401  | -0.386965 | 1.538015  |
| 67 | 7 | 0 | -4.740656 | 1.680083  | -1.617260 |
| 68 | 6 | 0 | -3.268645 | 3.378989  | -2.509433 |
| 69 | 6 | 0 | -5.696390 | 3.692603  | -2.231354 |
| 70 | 6 | 0 | -3.249034 | 4.491551  | -3.553894 |
| 71 | 1 | 0 | -2.995457 | 3.770942  | -1.514923 |
| 72 | 1 | 0 | -2.533592 | 2.621734  | -2.787886 |
| 73 | 6 | 0 | -5.708977 | 4.779828  | -3.294197 |
| 74 | 1 | 0 | -5.597917 | 4.147941  | -1.233109 |
| 75 | 1 | 0 | -6.620227 | 3.111854  | -2.249910 |
| 76 | 6 | 0 | -4.366193 | 5.504511  | -3.322419 |
| 77 | 1 | 0 | -2.268478 | 4.972144  | -3.523922 |
| 78 | 1 | 0 | -3.365511 | 4.042789  | -4.545774 |
| 79 | 1 | 0 | -6.527056 | 5.471299  | -3.079645 |
| 80 | 1 | 0 | -5.903997 | 4.325530  | -4.271324 |
| 81 | 1 | 0 | -4.354500 | 6.268651  | -4.103212 |
| 82 | 1 | 0 | -4.208194 | 6.011606  | -2.363381 |
| 83 | 7 | 0 | -4.588494 | 2.751894  | -2.450730 |
| 84 | 7 | 0 | 4.740637  | 1.680105  | 1.617275  |
| 85 | 7 | 0 | 4.588454  | 2.751904  | 2.450755  |
| 86 | 6 | 0 | 3.268595  | 3.378977  | 2.509456  |
| 87 | 6 | 0 | 5.696335  | 3.692634  | 2.231392  |
| 88 | 6 | 0 | 3.248959  | 4.491531  | 3.553926  |



|     |   |   |          |          |          |
|-----|---|---|----------|----------|----------|
| 89  | 1 | 0 | 2.995405 | 3.770934 | 1.514948 |
| 90  | 1 | 0 | 2.533553 | 2.621707 | 2.787900 |
| 91  | 6 | 0 | 5.708899 | 4.779852 | 3.294243 |
| 92  | 1 | 0 | 5.597860 | 4.147977 | 1.233151 |
| 93  | 1 | 0 | 6.620183 | 3.111900 | 2.249950 |
| 94  | 6 | 0 | 4.366102 | 5.504511 | 3.322463 |
| 95  | 1 | 0 | 2.268395 | 4.972107 | 3.523952 |
| 96  | 1 | 0 | 3.365438 | 4.042764 | 4.545802 |
| 97  | 1 | 0 | 6.526967 | 5.471338 | 3.079700 |
| 98  | 1 | 0 | 5.903921 | 4.325550 | 4.271369 |
| 99  | 1 | 0 | 4.354392 | 6.268645 | 4.103261 |
| 100 | 1 | 0 | 4.208100 | 6.011611 | 2.363428 |

-----

### Structure 14aa (vacuum)

Energy (Hartrees): = -2381.6007179  
 No imaginary frequencies

Standard orientation:

| Center<br>Number | Atomic<br>Number | Atomic<br>Type | Coordinates (Angstroms) |           |           |
|------------------|------------------|----------------|-------------------------|-----------|-----------|
|                  |                  |                | X                       | Y         | Z         |
| 1                | 6                | 0              | 5.052277                | -2.699947 | 0.837436  |
| 2                | 6                | 0              | 4.012495                | -2.996517 | 1.678720  |
| 3                | 6                | 0              | 2.877428                | -2.109223 | 1.684566  |
| 4                | 6                | 0              | 2.880836                | -0.915544 | 0.894494  |
| 5                | 6                | 0              | 4.034160                | -0.596738 | 0.086532  |
| 6                | 6                | 0              | 5.073827                | -1.510558 | 0.058752  |
| 7                | 6                | 0              | -4.063236               | 5.521581  | 1.667743  |
| 8                | 6                | 0              | 0.590906                | 1.981232  | 3.321928  |
| 9                | 6                | 0              | 4.092397                | -4.252318 | 2.533271  |
| 10               | 6                | 0              | 1.694257                | -0.123708 | 0.924233  |
| 11               | 6                | 0              | 0.594680                | -0.451503 | 1.697354  |
| 12               | 6                | 0              | 0.610675                | -1.628020 | 2.485291  |
| 13               | 6                | 0              | 1.728704                | -2.419056 | 2.461087  |
| 14               | 6                | 0              | 5.306141                | -4.234348 | 3.474465  |
| 15               | 6                | 0              | 4.061674                | -5.521102 | 1.669525  |
| 16               | 6                | 0              | -0.591307               | -1.981979 | 3.320988  |
| 17               | 6                | 0              | 4.197138                | 0.646427  | -0.681141 |
| 18               | 6                | 0              | -4.197146               | -0.646457 | -0.681028 |
| 19               | 6                | 0              | -0.594680               | 0.451421  | 1.697382  |
| 20               | 6                | 0              | -0.610815               | 1.627692  | 2.485685  |
| 21               | 6                | 0              | -1.728739               | 2.418868  | 2.461334  |
| 22               | 6                | 0              | -2.877289               | 2.109369  | 1.684416  |
| 23               | 6                | 0              | -2.880750               | 0.915651  | 0.894383  |
| 24               | 6                | 0              | -1.694165               | 0.123816  | 0.924061  |
| 25               | 6                | 0              | -4.091800               | 4.253183  | 2.532154  |
| 26               | 6                | 0              | -5.304265               | 4.234693  | 3.474984  |
| 27               | 6                | 0              | -4.012207               | 2.996854  | 1.678324  |
| 28               | 6                | 0              | -5.052407               | 2.699796  | 0.837714  |
| 29               | 6                | 0              | -5.074098               | 1.510254  | 0.059279  |
| 30               | 6                | 0              | -4.034205               | 0.596680  | 0.086686  |
| 31               | 1                | 0              | -3.459339               | -1.420208 | -0.558683 |
| 32               | 1                | 0              | -1.712031               | 3.319070  | 3.056527  |
| 33               | 1                | 0              | 3.459691                | 1.420448  | -0.558277 |
| 34               | 1                | 0              | 1.711844                | -3.319575 | 3.055805  |
| 35               | 1                | 0              | -6.732108               | 3.093508  | 0.093004  |
| 36               | 1                | 0              | -4.059295               | 6.409317  | 2.305454  |
| 37               | 1                | 0              | 3.218173                | -4.288201 | 3.179143  |
| 38               | 8                | 0              | -1.636215               | -1.004335 | 0.156279  |
| 39               | 1                | 0              | 5.266238                | -5.100553 | 4.140021  |
| 40               | 1                | 0              | 5.303152                | -3.332058 | 4.090047  |
| 41               | 1                | 0              | 6.241237                | -4.271181 | 2.917991  |
| 42               | 1                | 0              | 4.058265                | -6.408604 | 2.307564  |
| 43               | 1                | 0              | 3.164146                | -5.542568 | 1.046983  |
| 44               | 1                | 0              | 4.935430                | -5.567157 | 1.019268  |
| 45               | 1                | 0              | 0.854761                | 1.159098  | 3.992300  |
| 46               | 1                | 0              | 0.396227                | 2.871942  | 3.919294  |
| 47               | 1                | 0              | 1.466138                | 2.170329  | 2.693283  |
| 48               | 8                | 0              | 6.132005                | -3.512399 | 0.725119  |
| 49               | 1                | 0              | 6.731522                | -3.094207 | 0.091988  |
| 50               | 8                | 0              | 6.184751                | -1.363913 | -0.678178 |
| 51               | 1                | 0              | 6.056179                | -0.519662 | -1.223092 |
| 52               | 1                | 0              | -0.396889               | -2.873116 | 3.917801  |
| 53               | 1                | 0              | -1.466401               | -2.170544 | 2.691991  |
| 54               | 1                | 0              | -0.855228               | -1.160270 | 3.991855  |
| 55               | 8                | 0              | 1.636395                | 1.004596  | 0.156679  |
| 56               | 8                | 0              | -6.185291               | 1.363292  | -0.677182 |
| 57               | 1                | 0              | -3.166666               | 5.543297  | 1.043836  |
| 58               | 1                | 0              | -4.938004               | 5.566951  | 1.018824  |
| 59               | 8                | 0              | -6.132409               | 3.511944  | 0.725803  |
| 60               | 1                | 0              | -3.216634               | 4.290275  | 3.176670  |
| 61               | 1                | 0              | -5.264542               | 5.101500  | 4.139768  |
| 62               | 1                | 0              | -5.299553               | 3.332905  | 4.091289  |
| 63               | 1                | 0              | -6.240074               | 4.270036  | 2.919588  |

|     |   |   |           |           |           |
|-----|---|---|-----------|-----------|-----------|
| 64  | 1 | 0 | -6.056713 | 0.519086  | -1.222172 |
| 65  | 1 | 0 | 0.754665  | 1.389556  | 0.257126  |
| 66  | 1 | 0 | -0.754518 | -1.389349 | 0.256820  |
| 67  | 7 | 0 | 5.208494  | 0.790373  | -1.460809 |
| 68  | 6 | 0 | 4.245707  | 2.840386  | -2.381791 |
| 69  | 6 | 0 | 6.679122  | 2.546178  | -1.857771 |
| 70  | 6 | 0 | 4.629280  | 3.995914  | -3.311397 |
| 71  | 1 | 0 | 3.971377  | 3.268155  | -1.400531 |
| 72  | 6 | 0 | 7.030603  | 3.676958  | -2.817225 |
| 73  | 1 | 0 | 6.563768  | 2.975031  | -0.845891 |
| 74  | 6 | 0 | 5.908782  | 4.701857  | -2.890551 |
| 75  | 1 | 0 | 3.787810  | 4.692498  | -3.342856 |
| 76  | 1 | 0 | 4.754392  | 3.589083  | -4.321280 |
| 77  | 1 | 0 | 7.963235  | 4.136009  | -2.479538 |
| 78  | 1 | 0 | 7.211902  | 3.247828  | -3.809332 |
| 79  | 1 | 0 | 6.153430  | 5.501270  | -3.593801 |
| 80  | 1 | 0 | 5.771290  | 5.166196  | -1.906995 |
| 81  | 7 | 0 | 5.391631  | 1.923104  | -2.244975 |
| 82  | 7 | 0 | -5.208722 | -0.790568 | -1.460381 |
| 83  | 7 | 0 | -5.391746 | -1.923138 | -2.244823 |
| 84  | 6 | 0 | -4.245583 | -2.840031 | -2.382318 |
| 85  | 6 | 0 | -6.678961 | -2.546671 | -1.857489 |
| 86  | 6 | 0 | -4.629098 | -3.995319 | -3.312237 |
| 87  | 1 | 0 | -3.970840 | -3.268085 | -1.401302 |
| 88  | 6 | 0 | -7.030392 | -3.677192 | -2.817266 |
| 89  | 1 | 0 | -6.563248 | -2.975849 | -0.845788 |
| 90  | 6 | 0 | -5.908301 | -4.701747 | -2.891294 |
| 91  | 1 | 0 | -3.787461 | -4.691684 | -3.344150 |
| 92  | 1 | 0 | -4.754559 | -3.588157 | -4.321944 |
| 93  | 1 | 0 | -7.962798 | -4.136639 | -2.479493 |
| 94  | 1 | 0 | -7.212094 | -3.247743 | -3.809162 |
| 95  | 1 | 0 | -6.152931 | -5.500972 | -3.594763 |
| 96  | 1 | 0 | -5.770406 | -5.166407 | -1.907945 |
| 97  | 6 | 0 | 3.044791  | 2.120884  | -3.009527 |
| 98  | 1 | 0 | 3.389924  | 1.564915  | -3.884127 |
| 99  | 1 | 0 | 2.528413  | 1.430684  | -2.345804 |
| 100 | 1 | 0 | 2.318657  | 2.865779  | -3.341359 |
| 101 | 6 | 0 | 7.797871  | 1.507915  | -1.830775 |
| 102 | 1 | 0 | 7.708455  | 0.815438  | -0.995252 |
| 103 | 1 | 0 | 7.791401  | 0.936419  | -2.762549 |
| 104 | 1 | 0 | 8.759207  | 2.017921  | -1.743768 |
| 105 | 6 | 0 | -7.797957 | -1.508684 | -1.829857 |
| 106 | 1 | 0 | -7.708512 | -0.816484 | -0.994109 |
| 107 | 1 | 0 | -7.791819 | -0.936854 | -2.761430 |
| 108 | 1 | 0 | -8.759155 | -2.018944 | -1.742825 |
| 109 | 6 | 0 | -3.045078 | -2.119876 | -3.010129 |
| 110 | 1 | 0 | -3.390791 | -1.563169 | -3.884032 |
| 111 | 1 | 0 | -2.528361 | -1.430232 | -2.346086 |
| 112 | 1 | 0 | -2.319066 | -2.864390 | -3.343076 |

### Structure 14aa (CHCl<sub>3</sub>)

Energy (Hartrees): = -2381.6438267

No imaginary frequencies

Standard orientation:

| Center<br>Number | Atomic<br>Number | Atomic<br>Type | Coordinates (Angstroms) |           |           |
|------------------|------------------|----------------|-------------------------|-----------|-----------|
|                  |                  |                | X                       | Y         | Z         |
| 1                | 6                | 0              | -5.054369               | -2.735388 | -0.857133 |
| 2                | 6                | 0              | -3.993682               | -3.029309 | -1.673897 |
| 3                | 6                | 0              | -2.861057               | -2.137571 | -1.653529 |
| 4                | 6                | 0              | -2.887507               | -0.939996 | -0.869143 |
| 5                | 6                | 0              | -4.061775               | -0.624453 | -0.087790 |
| 6                | 6                | 0              | -5.098396               | -1.543841 | -0.081985 |
| 7                | 6                | 0              | 3.989528                | 5.552157  | -1.651583 |
| 8                | 6                | 0              | -0.637197               | 2.003543  | -3.216991 |
| 9                | 6                | 0              | -4.040490               | -4.290886 | -2.523989 |
| 10               | 6                | 0              | -1.705057               | -0.138174 | -0.878483 |
| 11               | 6                | 0              | -0.589170               | -0.459549 | -1.631239 |
| 12               | 6                | 0              | -0.580119               | -1.645697 | -2.406981 |
| 13               | 6                | 0              | -1.691968               | -2.447334 | -2.400135 |
| 14               | 6                | 0              | -5.242824               | -4.312273 | -3.478936 |
| 15               | 6                | 0              | -3.989690               | -5.552193 | -1.651331 |
| 16               | 6                | 0              | 0.637154                | -2.003648 | -3.216913 |
| 17               | 6                | 0              | -4.252822               | 0.621902  | 0.671632  |
| 18               | 6                | 0              | 4.252808                | -0.621867 | 0.671613  |
| 19               | 6                | 0              | 0.589133                | 0.459509  | -1.631260 |
| 20               | 6                | 0              | 0.580080                | 1.645624  | -2.407050 |
| 21               | 6                | 0              | 1.691929                | 2.447261  | -2.400241 |
| 22               | 6                | 0              | 2.861022                | 2.137529  | -1.653627 |
| 23               | 6                | 0              | 2.887473                | 0.939985  | -0.869194 |
| 24               | 6                | 0              | 1.705023                | 0.138163  | -0.878497 |
| 25               | 6                | 0              | 4.040483                | 4.290807  | -2.524171 |
| 26               | 6                | 0              | 5.242936                | 4.312196  | -3.478966 |

|     |   |   |           |           |           |
|-----|---|---|-----------|-----------|-----------|
| 27  | 6 | 0 | 3.993648  | 3.029268  | -1.674027 |
| 28  | 6 | 0 | 5.054351  | 2.735361  | -0.857279 |
| 29  | 6 | 0 | 5.098379  | 1.543842  | -0.082088 |
| 30  | 6 | 0 | 4.061748  | 0.624465  | -0.087843 |
| 31  | 1 | 0 | 3.523033  | -1.404728 | 0.561668  |
| 32  | 1 | 0 | 1.652240  | 3.353884  | -2.985300 |
| 33  | 1 | 0 | -3.523059 | 1.404767  | 0.561634  |
| 34  | 1 | 0 | -1.652284 | -3.353983 | -2.985155 |
| 35  | 1 | 0 | 6.758596  | 3.152261  | -0.154952 |
| 36  | 1 | 0 | 3.968768  | 6.445310  | -2.282330 |
| 37  | 1 | 0 | -3.160052 | -4.310937 | -3.161631 |
| 38  | 8 | 0 | 1.680946  | -0.989523 | -0.113959 |
| 39  | 1 | 0 | -5.160472 | -5.171869 | -4.149827 |
| 40  | 1 | 0 | -5.268175 | -3.408656 | -4.093438 |
| 41  | 1 | 0 | -6.186406 | -4.388785 | -2.940045 |
| 42  | 1 | 0 | -3.968911 | -6.445381 | -2.282030 |
| 43  | 1 | 0 | -3.093049 | -5.557423 | -1.026025 |
| 44  | 1 | 0 | -4.863761 | -5.612829 | -1.001141 |
| 45  | 1 | 0 | -0.892579 | 1.201595  | -3.915134 |
| 46  | 1 | 0 | -0.464709 | 2.917700  | -3.785733 |
| 47  | 1 | 0 | -1.508555 | 2.158896  | -2.573568 |
| 48  | 8 | 0 | -6.128372 | -3.558333 | -0.767782 |
| 49  | 1 | 0 | -6.758570 | -3.152303 | -0.154706 |
| 50  | 8 | 0 | -6.223555 | -1.398703 | 0.632412  |
| 51  | 1 | 0 | -6.107507 | -0.545702 | 1.174654  |
| 52  | 1 | 0 | 0.464664  | -2.917828 | -3.785617 |
| 53  | 1 | 0 | 1.508516  | -2.158974 | -2.573488 |
| 54  | 1 | 0 | 0.892531  | -1.201729 | -3.915090 |
| 55  | 8 | 0 | -1.680976 | 0.989541  | -0.113989 |
| 56  | 8 | 0 | 6.223543  | 1.398717  | 0.632302  |
| 57  | 1 | 0 | 3.092820  | 5.557372  | -1.026372 |
| 58  | 1 | 0 | 4.863526  | 5.612875  | -1.001303 |
| 59  | 8 | 0 | 6.128382  | 3.558279  | -0.768018 |
| 60  | 1 | 0 | 3.160119  | 4.310793  | -3.161915 |
| 61  | 1 | 0 | 5.160655  | 5.171775  | -4.149887 |
| 62  | 1 | 0 | 5.268389  | 3.408565  | -4.093442 |
| 63  | 1 | 0 | 6.186446  | 4.388740  | -2.939949 |
| 64  | 1 | 0 | 6.107480  | 0.545751  | 1.174594  |
| 65  | 1 | 0 | -0.796516 | 1.381196  | -0.159048 |
| 66  | 1 | 0 | 0.796487  | -1.381182 | -0.159002 |
| 67  | 7 | 0 | -5.281631 | 0.755141  | 1.430582  |
| 68  | 6 | 0 | -4.370282 | 2.823063  | 2.363208  |
| 69  | 6 | 0 | -6.796798 | 2.478221  | 1.813795  |
| 70  | 6 | 0 | -4.788037 | 3.978557  | 3.278049  |
| 71  | 1 | 0 | -4.092406 | 3.244822  | 1.381987  |
| 72  | 6 | 0 | -7.177429 | 3.607689  | 2.763584  |
| 73  | 1 | 0 | -6.677738 | 2.902995  | 0.801943  |
| 74  | 6 | 0 | -6.076891 | 4.654805  | 2.838680  |
| 75  | 1 | 0 | -3.960404 | 4.691411  | 3.309538  |
| 76  | 1 | 0 | -4.915160 | 3.580651  | 4.291535  |
| 77  | 1 | 0 | -8.115399 | 4.044764  | 2.411829  |
| 78  | 1 | 0 | -7.360238 | 3.183515  | 3.757955  |
| 79  | 1 | 0 | -6.344735 | 5.453240  | 3.534869  |
| 80  | 1 | 0 | -5.939510 | 5.114320  | 1.852794  |
| 81  | 7 | 0 | -5.497701 | 1.880165  | 2.216249  |
| 82  | 7 | 0 | 5.281654  | -0.755097 | 1.430515  |
| 83  | 7 | 0 | 5.497744  | -1.880109 | 2.216195  |
| 84  | 6 | 0 | 4.370331  | -2.823013 | 2.363168  |
| 85  | 6 | 0 | 6.796840  | -2.478164 | 1.813742  |
| 86  | 6 | 0 | 4.788094  | -3.978481 | 3.278038  |
| 87  | 1 | 0 | 4.092466  | -3.244796 | 1.381955  |
| 88  | 6 | 0 | 7.177483  | -3.607610 | 2.763554  |
| 89  | 1 | 0 | 6.677777  | -2.902960 | 0.801900  |
| 90  | 6 | 0 | 6.076951  | -4.654730 | 2.838680  |
| 91  | 1 | 0 | 3.960465  | -4.691338 | 3.309546  |
| 92  | 1 | 0 | 4.915216  | -3.580548 | 4.291514  |
| 93  | 1 | 0 | 8.115453  | -4.044688 | 2.411803  |
| 94  | 1 | 0 | 7.360295  | -3.183413 | 3.757914  |
| 95  | 1 | 0 | 6.344803  | -5.453147 | 3.534888  |
| 96  | 1 | 0 | 5.939568  | -5.114270 | 1.852807  |
| 97  | 6 | 0 | -3.166344 | 2.132252  | 3.014726  |
| 98  | 1 | 0 | -3.504565 | 1.593836  | 3.903766  |
| 99  | 1 | 0 | -2.635608 | 1.431427  | 2.372696  |
| 100 | 1 | 0 | -2.449745 | 2.893970  | 3.330341  |
| 101 | 6 | 0 | -7.894940 | 1.419759  | 1.780624  |
| 102 | 1 | 0 | -7.790892 | 0.730180  | 0.943578  |
| 103 | 1 | 0 | -7.891565 | 0.845719  | 2.711602  |
| 104 | 1 | 0 | -8.864464 | 1.913286  | 1.684447  |
| 105 | 6 | 0 | 7.894978  | -1.419698 | 1.780543  |
| 106 | 1 | 0 | 7.790925  | -0.730140 | 0.943479  |
| 107 | 1 | 0 | 7.891602  | -0.845634 | 2.711506  |
| 108 | 1 | 0 | 8.864503  | -1.913222 | 1.684376  |
| 109 | 6 | 0 | 3.166384  | -2.132191 | 3.014656  |
| 110 | 1 | 0 | 3.504595  | -1.593743 | 3.903681  |
| 111 | 1 | 0 | 2.635648  | -1.431392 | 2.372598  |
| 112 | 1 | 0 | 2.449789  | -2.893904 | 3.330291  |

## Structure 14aa (DMSO)

Energy (Hartrees): = -2381.6307347

No imaginary frequencies

Standard orientation:

| Center<br>Number | Atomic<br>Number | Atomic<br>Type | Coordinates (Angstroms) |           |           |
|------------------|------------------|----------------|-------------------------|-----------|-----------|
|                  |                  |                | X                       | Y         | Z         |
| 1                | 6                | 0              | -5.060375               | -2.693200 | -0.841097 |
| 2                | 6                | 0              | -4.026309               | -2.983319 | -1.693152 |
| 3                | 6                | 0              | -2.886525               | -2.099638 | -1.693462 |
| 4                | 6                | 0              | -2.880705               | -0.915501 | -0.888387 |
| 5                | 6                | 0              | -4.032785               | -0.597370 | -0.075916 |
| 6                | 6                | 0              | -5.074846               | -1.510313 | -0.051199 |
| 7                | 6                | 0              | 4.060431                | 5.507135  | -1.716332 |
| 8                | 6                | 0              | -0.564179               | 1.959906  | -3.357435 |
| 9                | 6                | 0              | -4.108784               | -4.229102 | -2.562994 |
| 10               | 6                | 0              | -1.687741               | -0.129396 | -0.907663 |
| 11               | 6                | 0              | -0.597398               | -0.448591 | -1.697282 |
| 12               | 6                | 0              | -0.624997               | -1.612911 | -2.504084 |
| 13               | 6                | 0              | -1.743938               | -2.404626 | -2.482578 |
| 14               | 6                | 0              | -5.331149               | -4.211493 | -3.491237 |
| 15               | 6                | 0              | -4.060169               | -5.507106 | -1.715906 |
| 16               | 6                | 0              | 0.564243                | -1.959864 | -3.357395 |
| 17               | 6                | 0              | -4.198770               | 0.647949  | 0.692162  |
| 18               | 6                | 0              | 4.198855                | -0.647863 | 0.691979  |
| 19               | 6                | 0              | 0.597527                | 0.448681  | -1.697323 |
| 20               | 6                | 0              | 0.625100                | 1.612972  | -2.504170 |
| 21               | 6                | 0              | 1.744053                | 2.404675  | -2.482753 |
| 22               | 6                | 0              | 2.886676                | 2.099702  | -1.693683 |
| 23               | 6                | 0              | 2.880873                | 0.915602  | -0.888557 |
| 24               | 6                | 0              | 1.687906                | 0.129508  | -0.907745 |
| 25               | 6                | 0              | 4.108954                | 4.229094  | -2.563367 |
| 26               | 6                | 0              | 5.331265                | 4.211402  | -3.491679 |
| 27               | 6                | 0              | 4.026484                | 2.983350  | -1.693467 |
| 28               | 6                | 0              | 5.060578                | 2.693238  | -0.841444 |
| 29               | 6                | 0              | 5.075061                | 1.510387  | -0.051490 |
| 30               | 6                | 0              | 4.032970                | 0.597463  | -0.076123 |
| 31               | 1                | 0              | 3.470579                | -1.430287 | 0.565145  |
| 32               | 1                | 0              | 1.729951                | 3.297761  | -3.089691 |
| 33               | 1                | 0              | -3.470598               | 1.430464  | 0.565306  |
| 34               | 1                | 0              | -1.729854               | -3.297739 | -3.089478 |
| 35               | 1                | 0              | 6.742923                | 3.094813  | -0.093461 |
| 36               | 1                | 0              | 4.057594                | 6.386829  | -2.365813 |
| 37               | 1                | 0              | -3.241747               | -4.253643 | -3.218089 |
| 38               | 8                | 0              | 1.626027                | -0.973307 | -0.111727 |
| 39               | 1                | 0              | -5.283028               | -5.064039 | -4.174260 |
| 40               | 1                | 0              | -5.349088               | -3.300008 | -4.094594 |
| 41               | 1                | 0              | -6.264496               | -4.273387 | -2.932442 |
| 42               | 1                | 0              | -4.057332               | -6.386827 | -2.365350 |
| 43               | 1                | 0              | -3.153472               | -5.535192 | -1.105656 |
| 44               | 1                | 0              | -4.924800               | -5.573201 | -1.053675 |
| 45               | 1                | 0              | -0.814376               | 1.136289  | -4.032274 |
| 46               | 1                | 0              | -0.361913               | 2.849980  | -3.953876 |
| 47               | 1                | 0              | -1.448753               | 2.152764  | -2.742544 |
| 48               | 8                | 0              | -6.141265               | -3.504707 | -0.731365 |
| 49               | 1                | 0              | -6.742681               | -3.094788 | -0.093026 |
| 50               | 8                | 0              | -6.179652               | -1.364080 | 0.693280  |
| 51               | 1                | 0              | -6.046984               | -0.507077 | 1.228611  |
| 52               | 1                | 0              | 0.361970                | -2.849984 | -3.953766 |
| 53               | 1                | 0              | 1.448860                | -2.152652 | -2.742544 |
| 54               | 1                | 0              | 0.814373                | -1.136283 | -4.032304 |
| 55               | 8                | 0              | -1.625806               | 0.973445  | -0.111686 |
| 56               | 8                | 0              | 6.179904                | 1.364209  | 0.692942  |
| 57               | 1                | 0              | 3.153767                | 5.535282  | -1.106036 |
| 58               | 1                | 0              | 4.925100                | 5.573226  | -1.054148 |
| 59               | 8                | 0              | 6.141491                | 3.504724  | -0.731791 |
| 60               | 1                | 0              | 3.241881                | 4.253637  | -3.218416 |
| 61               | 1                | 0              | 5.283133                | 5.063917  | -4.174738 |
| 62               | 1                | 0              | 5.349140                | 3.299889  | -4.094995 |
| 63               | 1                | 0              | 6.264646                | 4.273291  | -2.932940 |
| 64               | 1                | 0              | 6.047264                | 0.507244  | 1.228349  |
| 65               | 1                | 0              | -0.752508               | 1.380779  | -0.212254 |
| 66               | 1                | 0              | 0.752728                | -1.380654 | -0.212230 |
| 67               | 7                | 0              | -5.209725               | 0.780930  | 1.474927  |
| 68               | 6                | 0              | -4.277183               | 2.848130  | 2.387684  |
| 69               | 6                | 0              | -6.713158               | 2.509024  | 1.879647  |
| 70               | 6                | 0              | -4.675381               | 4.009093  | 3.303580  |
| 71               | 1                | 0              | -4.017930               | 3.263512  | 1.399571  |
| 72               | 6                | 0              | -7.073839               | 3.645130  | 2.828455  |
| 73               | 1                | 0              | -6.604497               | 2.927370  | 0.864640  |
| 74               | 6                | 0              | -5.967993               | 4.687759  | 2.879621  |
| 75               | 1                | 0              | -3.843771               | 4.717804  | 3.317124  |
| 76               | 1                | 0              | -4.788454               | 3.617883  | 4.321492  |
| 77               | 1                | 0              | -8.015334               | 4.082960  | 2.487499  |

|     |   |   |           |           |          |
|-----|---|---|-----------|-----------|----------|
| 78  | 1 | 0 | -7.243626 | 3.228551  | 3.828582 |
| 79  | 1 | 0 | -6.221520 | 5.491718  | 3.574834 |
| 80  | 1 | 0 | -5.843646 | 5.139335  | 1.888527 |
| 81  | 7 | 0 | -5.409777 | 1.905864  | 2.266375 |
| 82  | 7 | 0 | 5.209773  | -0.780983 | 1.474768 |
| 83  | 7 | 0 | 5.409619  | -1.905934 | 2.266245 |
| 84  | 6 | 0 | 4.276852  | -2.847993 | 2.387535 |
| 85  | 6 | 0 | 6.712898  | -2.509338 | 1.879552 |
| 86  | 6 | 0 | 4.674811  | -4.009017 | 3.303456 |
| 87  | 1 | 0 | 4.017556  | -3.263342 | 1.399419 |
| 88  | 6 | 0 | 7.073346  | -3.645504 | 2.828379 |
| 89  | 1 | 0 | 6.604182  | -2.927673 | 0.864547 |
| 90  | 6 | 0 | 5.967306  | -4.687928 | 2.879532 |
| 91  | 1 | 0 | 3.843069  | -4.717574 | 3.316990 |
| 92  | 1 | 0 | 4.787934  | -3.617815 | 4.321365 |
| 93  | 1 | 0 | 8.014767  | -4.083513 | 2.487448 |
| 94  | 1 | 0 | 7.243190  | -3.228948 | 3.828506 |
| 95  | 1 | 0 | 6.220668  | -5.491927 | 3.574759 |
| 96  | 1 | 0 | 5.842897  | -5.139492 | 1.888441 |
| 97  | 6 | 0 | -3.063840 | 2.158000  | 3.020036 |
| 98  | 1 | 0 | -3.376570 | 1.662302  | 3.942865 |
| 99  | 1 | 0 | -2.572434 | 1.421535  | 2.386534 |
| 100 | 1 | 0 | -2.320954 | 2.916826  | 3.276074 |
| 101 | 6 | 0 | -7.817474 | 1.456848  | 1.869629 |
| 102 | 1 | 0 | -7.734726 | 0.764364  | 1.032342 |
| 103 | 1 | 0 | -7.802587 | 0.885051  | 2.802204 |
| 104 | 1 | 0 | -8.784836 | 1.957349  | 1.789284 |
| 105 | 6 | 0 | 7.817414  | -1.457372 | 1.869552 |
| 106 | 1 | 0 | 7.734819  | -0.764880 | 1.032256 |
| 107 | 1 | 0 | 7.802615  | -0.885564 | 2.802122 |
| 108 | 1 | 0 | 8.784682  | -1.958057 | 1.789233 |
| 109 | 6 | 0 | 3.063613  | -2.157633 | 3.019834 |
| 110 | 1 | 0 | 3.376400  | -1.661979 | 3.942667 |
| 111 | 1 | 0 | 2.572364  | -1.421088 | 2.386303 |
| 112 | 1 | 0 | 2.320579  | -2.916320 | 3.275858 |

### Structure 14bb (vacuum)

Energy (Hartrees): = -2381.6113891  
 No imaginary frequencies

Standard orientation:

| Center<br>Number | Atomic<br>Number | Atomic<br>Type | Coordinates (Angstroms) |           |           |
|------------------|------------------|----------------|-------------------------|-----------|-----------|
|                  |                  |                | X                       | Y         | Z         |
| 1                | 6                | 0              | 4.967022                | 2.823980  | -0.795343 |
| 2                | 6                | 0              | 3.924023                | 3.114520  | -1.634822 |
| 3                | 6                | 0              | 2.817288                | 2.191031  | -1.684798 |
| 4                | 6                | 0              | 2.861715                | 0.968794  | -0.947780 |
| 5                | 6                | 0              | 4.024094                | 0.652492  | -0.155407 |
| 6                | 6                | 0              | 5.024193                | 1.605801  | -0.061054 |
| 7                | 6                | 0              | -3.866014               | -5.634606 | -1.523952 |
| 8                | 6                | 0              | 0.650430                | -2.007923 | -3.312612 |
| 9                | 6                | 0              | 3.961493                | 4.404889  | -2.438383 |
| 10               | 6                | 0              | 1.699907                | 0.145318  | -0.983312 |
| 11               | 6                | 0              | 0.584491                | 0.463870  | -1.738147 |
| 12               | 6                | 0              | 0.563779                | 1.663957  | -2.490385 |
| 13               | 6                | 0              | 1.656149                | 2.491431  | -2.445058 |
| 14               | 6                | 0              | 5.185652                | 4.476207  | -3.363317 |
| 15               | 6                | 0              | 3.865753                | 5.634485  | -1.524262 |
| 16               | 6                | 0              | -0.650650               | 2.007366  | -3.312767 |
| 17               | 6                | 0              | 4.270657                | -0.641950 | 0.485383  |
| 18               | 6                | 0              | -4.270621               | 0.641941  | 0.485527  |
| 19               | 6                | 0              | -0.584567               | -0.464277 | -1.738048 |
| 20               | 6                | 0              | -0.563899               | -1.664483 | -2.490104 |
| 21               | 6                | 0              | -1.656337               | -2.491857 | -2.444726 |
| 22               | 6                | 0              | -2.817484               | -2.191271 | -1.684542 |
| 23               | 6                | 0              | -2.861831               | -0.968962 | -0.947637 |
| 24               | 6                | 0              | -1.699976               | -0.145547 | -0.983282 |
| 25               | 6                | 0              | -3.961910               | -4.405030 | -2.438082 |
| 26               | 6                | 0              | -5.186206               | -4.476392 | -3.362833 |
| 27               | 6                | 0              | -3.924315               | -3.114646 | -1.634543 |
| 28               | 6                | 0              | -4.967268               | -2.823996 | -0.795043 |
| 29               | 6                | 0              | -5.024314               | -1.605781 | -0.060800 |
| 30               | 6                | 0              | -4.024175               | -0.652535 | -0.155257 |
| 31               | 1                | 0              | -3.663871               | 1.502586  | 0.233625  |
| 32               | 1                | 0              | -1.606049               | -3.412159 | -3.006454 |
| 33               | 1                | 0              | 3.664023                | -1.502675 | 0.233477  |
| 34               | 1                | 0              | 1.605823                | 3.411641  | -3.006935 |
| 35               | 1                | 0              | -6.630876               | -3.249124 | -0.026970 |
| 36               | 1                | 0              | -3.840409               | -6.546586 | -2.125870 |
| 37               | 1                | 0              | 3.093964                | 4.428268  | -3.093988 |
| 38               | 8                | 0              | -1.692055               | 0.991761  | -0.233153 |
| 39               | 1                | 0              | 5.117045                | 5.367397  | -3.992372 |
| 40               | 1                | 0              | 5.225675                | 3.601549  | -4.016321 |

|     |   |   |           |           |           |
|-----|---|---|-----------|-----------|-----------|
| 41  | 1 | 0 | 6.112573  | 4.527034  | -2.794503 |
| 42  | 1 | 0 | 3.840058  | 6.546447  | -2.126203 |
| 43  | 1 | 0 | 2.957008  | 5.597331  | -0.919057 |
| 44  | 1 | 0 | 4.725479  | 5.686927  | -0.856038 |
| 45  | 1 | 0 | 0.889349  | -1.199201 | -4.008072 |
| 46  | 1 | 0 | 0.484166  | -2.922173 | -3.882156 |
| 47  | 1 | 0 | 1.529138  | -2.151658 | -2.677089 |
| 48  | 8 | 0 | 6.014195  | 3.671471  | -0.640868 |
| 49  | 1 | 0 | 6.630645  | 3.249233  | -0.027374 |
| 50  | 8 | 0 | 6.134869  | 1.465164  | 0.674116  |
| 51  | 1 | 0 | 6.050537  | 0.593930  | 1.176482  |
| 52  | 1 | 0 | -0.483723 | 2.920524  | -3.883871 |
| 53  | 1 | 0 | -1.528783 | 2.153143  | -2.676893 |
| 54  | 1 | 0 | -0.890944 | 1.197798  | -4.006745 |
| 55  | 8 | 0 | 1.692042  | -0.991885 | -0.233026 |
| 56  | 8 | 0 | -6.134888 | -1.465036 | 0.674490  |
| 57  | 1 | 0 | -2.957179 | -5.597431 | -0.918885 |
| 58  | 1 | 0 | -4.725639 | -5.687031 | -0.855595 |
| 59  | 8 | 0 | -6.014487 | -3.671418 | -0.640491 |
| 60  | 1 | 0 | -3.094493 | -4.428401 | -3.093832 |
| 61  | 1 | 0 | -5.117653 | -5.367588 | -3.991884 |
| 62  | 1 | 0 | -5.226353 | -3.601747 | -4.015846 |
| 63  | 1 | 0 | -6.113045 | -4.527245 | -2.793889 |
| 64  | 1 | 0 | -6.050345 | -0.593809 | 1.176856  |
| 65  | 1 | 0 | 0.815231  | -1.393528 | -0.301693 |
| 66  | 1 | 0 | -0.815211 | 1.393323  | -0.301837 |
| 67  | 7 | 0 | 5.229572  | -0.782792 | 1.323261  |
| 68  | 6 | 0 | 6.795220  | -2.457165 | 1.789089  |
| 69  | 6 | 0 | 4.844604  | -2.105362 | 3.233446  |
| 70  | 6 | 0 | 6.982625  | -3.865776 | 2.347395  |
| 71  | 1 | 0 | 7.363209  | -1.746263 | 2.415960  |
| 72  | 6 | 0 | 5.003825  | -3.509579 | 3.813000  |
| 73  | 1 | 0 | 5.442759  | -1.399956 | 3.836635  |
| 74  | 6 | 0 | 6.453720  | -3.976080 | 3.772202  |
| 75  | 1 | 0 | 8.044815  | -4.121199 | 2.303949  |
| 76  | 1 | 0 | 6.447610  | -4.565696 | 1.695714  |
| 77  | 1 | 0 | 4.623995  | -3.508336 | 4.837990  |
| 78  | 1 | 0 | 4.375721  | -4.191217 | 3.228592  |
| 79  | 1 | 0 | 6.540635  | -5.001296 | 4.139756  |
| 80  | 1 | 0 | 7.057720  | -3.343960 | 4.433259  |
| 81  | 7 | 0 | 5.360093  | -2.104693 | 1.842048  |
| 82  | 7 | 0 | -5.229571 | 0.782957  | 1.323329  |
| 83  | 7 | 0 | -5.359849 | 2.104875  | 1.842100  |
| 84  | 6 | 0 | -6.794871 | 2.457702  | 1.789010  |
| 85  | 6 | 0 | -4.844411 | 2.105493  | 3.233523  |
| 86  | 6 | 0 | -6.981971 | 3.866381  | 2.347249  |
| 87  | 1 | 0 | -7.363070 | 1.746956  | 2.415858  |
| 88  | 6 | 0 | -5.003369 | 3.509767  | 3.813041  |
| 89  | 1 | 0 | -5.442684 | 1.400205  | 3.836734  |
| 90  | 6 | 0 | -6.453152 | 3.976608  | 3.772100  |
| 91  | 1 | 0 | -8.044098 | 4.122062  | 2.303706  |
| 92  | 1 | 0 | -6.446735 | 4.566154  | 1.695587  |
| 93  | 1 | 0 | -4.623618 | 3.508485  | 4.838066  |
| 94  | 1 | 0 | -4.375073 | 4.191242  | 3.228651  |
| 95  | 1 | 0 | -6.539845 | 5.001862  | 4.139607  |
| 96  | 1 | 0 | -7.057353 | 3.344665  | 4.433141  |
| 97  | 6 | 0 | 7.300975  | -2.372473 | 0.354165  |
| 98  | 1 | 0 | 6.678723  | -2.996816 | -0.292729 |
| 99  | 1 | 0 | 7.275993  | -1.350314 | -0.024421 |
| 100 | 1 | 0 | 8.330641  | -2.731916 | 0.301175  |
| 101 | 6 | 0 | 3.381164  | -1.680284 | 3.274780  |
| 102 | 1 | 0 | 3.243469  | -0.637037 | 2.992428  |
| 103 | 1 | 0 | 2.791378  | -2.301683 | 2.595211  |
| 104 | 1 | 0 | 2.993608  | -1.810619 | 4.287250  |
| 105 | 6 | 0 | -3.381062 | 1.680169  | 3.274871  |
| 106 | 1 | 0 | -3.243550 | 0.636898  | 2.992529  |
| 107 | 1 | 0 | -2.791158 | 2.301462  | 2.595304  |
| 108 | 1 | 0 | -2.993501 | 1.810456  | 4.287350  |
| 109 | 6 | 0 | -7.300528 | 2.373026  | 0.354057  |
| 110 | 1 | 0 | -6.677967 | 2.997039  | -0.292870 |
| 111 | 1 | 0 | -7.275932 | 1.350803  | -0.024399 |
| 112 | 1 | 0 | -8.330046 | 2.732856  | 0.300939  |

### Structure 14bb (CHCl<sub>3</sub>)

Energy (Hartrees): = -2381.6546006  
 No imaginary frequencies

Standard orientation:

| Center Number | Atomic Number | Atomic Type | Coordinates (Angstroms) |          |           |
|---------------|---------------|-------------|-------------------------|----------|-----------|
|               |               |             | X                       | Y        | Z         |
| 1             | 6             | 0           | 5.015963                | 2.782733 | -0.861120 |
| 2             | 6             | 0           | 3.966278                | 3.068680 | -1.694711 |
| 3             | 6             | 0           | 2.840410                | 2.166117 | -1.700794 |

|    |   |   |           |           |           |
|----|---|---|-----------|-----------|-----------|
| 4  | 6 | 0 | 2.879382  | 0.955943  | -0.943689 |
| 5  | 6 | 0 | 4.050540  | 0.638207  | -0.163277 |
| 6  | 6 | 0 | 5.062599  | 1.582393  | -0.096519 |
| 7  | 6 | 0 | -3.914849 | -5.590036 | -1.654426 |
| 8  | 6 | 0 | 0.656892  | -2.015726 | -3.259007 |
| 9  | 6 | 0 | 4.008549  | 4.336065  | -2.535245 |
| 10 | 6 | 0 | 1.706628  | 0.144601  | -0.948091 |
| 11 | 6 | 0 | 0.585808  | 0.462936  | -1.694843 |
| 12 | 6 | 0 | 0.565382  | 1.658539  | -2.456466 |
| 13 | 6 | 0 | 1.667875  | 2.474945  | -2.440989 |
| 14 | 6 | 0 | 5.229793  | 4.385297  | -3.464635 |
| 15 | 6 | 0 | 3.914721  | 5.589793  | -1.655522 |
| 16 | 6 | 0 | -0.657086 | 2.014894  | -3.259429 |
| 17 | 6 | 0 | 4.295056  | -0.650906 | 0.493595  |
| 18 | 6 | 0 | -4.295074 | 0.651074  | 0.493546  |
| 19 | 6 | 0 | -0.585904 | -0.463398 | -1.694718 |
| 20 | 6 | 0 | -0.565548 | -1.659152 | -2.456102 |
| 21 | 6 | 0 | -1.668090 | -2.475491 | -2.440464 |
| 22 | 6 | 0 | -2.840621 | -2.166445 | -1.700345 |
| 23 | 6 | 0 | -2.879505 | -0.956123 | -0.943469 |
| 24 | 6 | 0 | -1.706693 | -0.144866 | -0.948009 |
| 25 | 6 | 0 | -4.009017 | -4.336470 | -2.534345 |
| 26 | 6 | 0 | -5.230606 | -4.385909 | -3.463263 |
| 27 | 6 | 0 | -3.966566 | -3.068923 | -1.694068 |
| 28 | 6 | 0 | -5.016258 | -2.782700 | -0.860582 |
| 29 | 6 | 0 | -5.062790 | -1.582215 | -0.096205 |
| 30 | 6 | 0 | -4.050646 | -0.638146 | -0.163133 |
| 31 | 1 | 0 | -3.690783 | 1.514869  | 0.245261  |
| 32 | 1 | 0 | -1.614921 | -3.392774 | -3.007992 |
| 33 | 1 | 0 | 3.690948  | -1.514819 | 0.245277  |
| 34 | 1 | 0 | 1.614667  | 3.392114  | -3.008701 |
| 35 | 1 | 0 | -6.708943 | -3.216500 | -0.134787 |
| 36 | 1 | 0 | -3.896439 | -6.487281 | -2.279291 |
| 37 | 1 | 0 | 3.141166  | 4.341182  | -3.191097 |
| 38 | 8 | 0 | -1.705402 | 0.976164  | -0.177832 |
| 39 | 1 | 0 | 5.141549  | 5.243795  | -4.135998 |
| 40 | 1 | 0 | 5.286525  | 3.483295  | -4.079407 |
| 41 | 1 | 0 | 6.160698  | 4.481294  | -2.907194 |
| 42 | 1 | 0 | 3.896165  | 6.486930  | -2.280537 |
| 43 | 1 | 0 | 3.002136  | 5.576545  | -1.053943 |
| 44 | 1 | 0 | 4.770690  | 5.659340  | -0.982474 |
| 45 | 1 | 0 | 0.907221  | -1.218911 | -3.964775 |
| 46 | 1 | 0 | 0.493620  | -2.937144 | -3.818553 |
| 47 | 1 | 0 | 1.527390  | -2.157743 | -2.611458 |
| 48 | 8 | 0 | 6.074408  | 3.622097  | -0.744342 |
| 49 | 1 | 0 | 6.708507  | 3.216902  | -0.135213 |
| 50 | 8 | 0 | 6.176217  | 1.441846  | 0.633657  |
| 51 | 1 | 0 | 6.082157  | 0.578266  | 1.152560  |
| 52 | 1 | 0 | -0.493805 | 2.936123  | -3.819282 |
| 53 | 1 | 0 | -1.527541 | 2.157161  | -2.611876 |
| 54 | 1 | 0 | -0.907487 | 1.217856  | -3.964918 |
| 55 | 8 | 0 | 1.705417  | -0.976293 | -0.177716 |
| 56 | 8 | 0 | -6.176365 | -1.441404 | 0.633987  |
| 57 | 1 | 0 | -3.002074 | -5.576635 | -1.053140 |
| 58 | 1 | 0 | -4.770597 | -5.659518 | -0.981094 |
| 59 | 8 | 0 | -6.074840 | -3.621887 | -0.743783 |
| 60 | 1 | 0 | -3.141857 | -4.341690 | -3.190489 |
| 61 | 1 | 0 | -5.142678 | -5.244619 | -4.134398 |
| 62 | 1 | 0 | -5.287523 | -3.484088 | -4.078284 |
| 63 | 1 | 0 | -6.161301 | -4.481679 | -2.905424 |
| 64 | 1 | 0 | -6.082148 | -0.577768 | 1.152758  |
| 65 | 1 | 0 | 0.823738  | -1.375446 | -0.201735 |
| 66 | 1 | 0 | -0.823697 | 1.375257  | -0.201928 |
| 67 | 7 | 0 | 5.254150  | -0.777919 | 1.332406  |
| 68 | 6 | 0 | 6.852645  | -2.405666 | 1.834211  |
| 69 | 6 | 0 | 4.882753  | -2.069803 | 3.263941  |
| 70 | 6 | 0 | 7.080564  | -3.789946 | 2.435351  |
| 71 | 1 | 0 | 7.395160  | -1.659894 | 2.441281  |
| 72 | 6 | 0 | 5.089253  | -3.448654 | 3.888065  |
| 73 | 1 | 0 | 5.451843  | -1.323697 | 3.844707  |
| 74 | 6 | 0 | 6.552671  | -3.870999 | 3.862323  |
| 75 | 1 | 0 | 8.150841  | -4.010435 | 2.401871  |
| 76 | 1 | 0 | 6.571713  | -4.528945 | 1.805535  |
| 77 | 1 | 0 | 4.709188  | -3.423106 | 4.912711  |
| 78 | 1 | 0 | 4.482930  | -4.171101 | 3.329406  |
| 79 | 1 | 0 | 6.668666  | -4.881661 | 4.261383  |
| 80 | 1 | 0 | 7.136666  | -3.200661 | 4.503400  |
| 81 | 7 | 0 | 5.405266  | -2.089450 | 1.871849  |
| 82 | 7 | 0 | -5.254200 | 0.778259  | 1.332292  |
| 83 | 7 | 0 | -5.405012 | 2.089803  | 1.871782  |
| 84 | 6 | 0 | -6.852320 | 2.406382  | 1.834274  |
| 85 | 6 | 0 | -4.882390 | 2.069905  | 3.263817  |
| 86 | 6 | 0 | -7.079853 | 3.790651  | 2.435598  |
| 87 | 1 | 0 | -7.394985 | 1.660674  | 2.441289  |
| 88 | 6 | 0 | -5.088487 | 3.448750  | 3.888086  |
| 89 | 1 | 0 | -5.451619 | 1.323885  | 3.844559  |
| 90 | 6 | 0 | -6.551808 | 3.871435  | 3.862529  |
| 91 | 1 | 0 | -8.150079 | 4.011405  | 2.402240  |

|     |   |   |           |           |           |
|-----|---|---|-----------|-----------|-----------|
| 92  | 1 | 0 | -6.570882 | 4.529594  | 1.805813  |
| 93  | 1 | 0 | -4.708328 | 3.423018  | 4.912692  |
| 94  | 1 | 0 | -4.482052 | 4.171106  | 3.329432  |
| 95  | 1 | 0 | -6.667531 | 4.882081  | 4.261706  |
| 96  | 1 | 0 | -7.135896 | 3.201164  | 4.503591  |
| 97  | 6 | 0 | 7.361711  | -2.348348 | 0.399501  |
| 98  | 1 | 0 | 6.758576  | -3.001951 | -0.237631 |
| 99  | 1 | 0 | 7.320690  | -1.336927 | -0.007696 |
| 100 | 1 | 0 | 8.399611  | -2.686896 | 0.360739  |
| 101 | 6 | 0 | 3.404541  | -1.700178 | 3.287637  |
| 102 | 1 | 0 | 3.223558  | -0.673523 | 2.968036  |
| 103 | 1 | 0 | 2.836150  | -2.371149 | 2.636820  |
| 104 | 1 | 0 | 3.022320  | -1.804912 | 4.305607  |
| 105 | 6 | 0 | -3.404275 | 1.699885  | 3.287318  |
| 106 | 1 | 0 | -3.223599 | 0.673223  | 2.967563  |
| 107 | 1 | 0 | -2.835770 | 2.370787  | 2.636531  |
| 108 | 1 | 0 | -3.021930 | 1.804384  | 4.305265  |
| 109 | 6 | 0 | -7.361497 | 2.349383  | 0.399590  |
| 110 | 1 | 0 | -6.758235 | 3.002917  | -0.237492 |
| 111 | 1 | 0 | -7.320772 | 1.338010  | -0.007750 |
| 112 | 1 | 0 | -8.399310 | 2.688213  | 0.360943  |

### Structure 14bb (DMSO)

Energy (Hartrees): = -2381.6409022  
 No imaginary frequencies

Standard orientation:

| Center<br>Number | Atomic<br>Number | Atomic<br>Type | Coordinates (Angstroms) |           |           |
|------------------|------------------|----------------|-------------------------|-----------|-----------|
|                  |                  |                | X                       | Y         | Z         |
| 1                | 6                | 0              | -4.749575               | -3.143612 | -0.526706 |
| 2                | 6                | 0              | -3.664936               | -3.414182 | -1.320815 |
| 3                | 6                | 0              | -2.646286               | -2.398437 | -1.448107 |
| 4                | 6                | 0              | -2.798999               | -1.138708 | -0.794309 |
| 5                | 6                | 0              | -4.006036               | -0.853444 | -0.059565 |
| 6                | 6                | 0              | -4.931341               | -1.873267 | 0.092199  |
| 7                | 6                | 0              | 3.371169                | 5.888493  | -0.943746 |
| 8                | 6                | 0              | -0.775105               | 2.001973  | -3.124475 |
| 9                | 6                | 0              | -3.552642               | -4.777213 | -1.986373 |
| 10               | 6                | 0              | -1.694945               | -0.239330 | -0.839605 |
| 11               | 6                | 0              | -0.554814               | -0.499906 | -1.580477 |
| 12               | 6                | 0              | -0.447359               | -1.721773 | -2.292718 |
| 13               | 6                | 0              | -1.466358               | -2.637549 | -2.202079 |
| 14               | 6                | 0              | -4.728352               | -5.069104 | -2.928171 |
| 15               | 6                | 0              | -3.371012               | -5.888461 | -0.944189 |
| 16               | 6                | 0              | 0.775169                | -2.001771 | -3.124570 |
| 17               | 6                | 0              | -4.391363               | 0.478222  | 0.418534  |
| 18               | 6                | 0              | 4.391330                | -0.478265 | 0.418624  |
| 19               | 6                | 0              | 0.554826                | 0.500007  | -1.580431 |
| 20               | 6                | 0              | 0.447400                | 1.721912  | -2.292610 |
| 21               | 6                | 0              | 1.466406                | 2.637674  | -2.201895 |
| 22               | 6                | 0              | 2.646318                | 2.398508  | -1.447914 |
| 23               | 6                | 0              | 2.799002                | 1.138742  | -0.794181 |
| 24               | 6                | 0              | 1.694935                | 0.239384  | -0.839542 |
| 25               | 6                | 0              | 3.552711                | 4.777312  | -1.986018 |
| 26               | 6                | 0              | 4.728395                | 5.069224  | -2.927842 |
| 27               | 6                | 0              | 3.664984                | 3.414230  | -1.320561 |
| 28               | 6                | 0              | 4.749622                | 3.143591  | -0.526471 |
| 29               | 6                | 0              | 4.931357                | 1.873212  | 0.092372  |
| 30               | 6                | 0              | 4.006030                | 0.853420  | -0.059442 |
| 31               | 1                | 0              | 3.852071                | -1.356464 | 0.082310  |
| 32               | 1                | 0              | 1.340927                | 3.570779  | -2.730990 |
| 33               | 1                | 0              | -3.852143               | 1.356439  | 0.082203  |
| 34               | 1                | 0              | -1.340853               | -3.570626 | -2.731218 |
| 35               | 1                | 0              | 6.395427                | 3.651555  | 0.245259  |
| 36               | 1                | 0              | 3.226364                | 6.849662  | -1.444331 |
| 37               | 1                | 0              | -2.661402               | -4.785916 | -2.608408 |
| 38               | 8                | 0              | 1.777927                | -0.898154 | -0.100109 |
| 39               | 1                | 0              | -4.545108               | -6.006273 | -3.460702 |
| 40               | 1                | 0              | -4.838406               | -4.276229 | -3.672561 |
| 41               | 1                | 0              | -5.667541               | -5.163566 | -2.383809 |
| 42               | 1                | 0              | -3.226207               | -6.849591 | -1.444847 |
| 43               | 1                | 0              | -2.493626               | -5.695470 | -0.321328 |
| 44               | 1                | 0              | -4.244922               | -5.967354 | -0.295953 |
| 45               | 1                | 0              | -0.925361               | 1.218295  | -3.872386 |
| 46               | 1                | 0              | -0.676144               | 2.958147  | -3.638850 |
| 47               | 1                | 0              | -1.678746               | 2.037837  | -2.508689 |
| 48               | 8                | 0              | -5.721381               | -4.064507 | -0.313393 |
| 49               | 1                | 0              | -6.395361               | -3.651658 | 0.245012  |
| 50               | 8                | 0              | -6.073368               | -1.755410 | 0.779053  |
| 51               | 1                | 0              | -6.087045               | -0.819057 | 1.167192  |
| 52               | 1                | 0              | 0.676244                | -2.957930 | -3.638981 |
| 53               | 1                | 0              | 1.678800                | -2.037632 | -2.508770 |
| 54               | 1                | 0              | 0.925416                | -1.218062 | -3.872450 |



|     |   |   |           |           |           |
|-----|---|---|-----------|-----------|-----------|
| 55  | 8 | 0 | -1.777969 | 0.898173  | -0.100121 |
| 56  | 8 | 0 | 6.073373  | 1.755288  | 0.779233  |
| 57  | 1 | 0 | 2.493810  | 5.695487  | -0.320851 |
| 58  | 1 | 0 | 4.245116  | 5.967317  | -0.295550 |
| 59  | 8 | 0 | 5.721452  | 4.064451  | -0.313117 |
| 60  | 1 | 0 | 2.661443  | 4.786094  | -2.608012 |
| 61  | 1 | 0 | 4.545181  | 6.006451  | -3.460282 |
| 62  | 1 | 0 | 4.838378  | 4.276411  | -3.672307 |
| 63  | 1 | 0 | 5.667611  | 5.163588  | -2.383509 |
| 64  | 1 | 0 | 6.087019  | 0.818917  | 1.167327  |
| 65  | 1 | 0 | -0.935339 | 1.371685  | -0.157565 |
| 66  | 1 | 0 | 0.935292  | -1.371653 | -0.157592 |
| 67  | 7 | 0 | -5.404972 | 0.621912  | 1.187545  |
| 68  | 6 | 0 | -7.160081 | 2.167690  | 1.227712  |
| 69  | 6 | 0 | -5.417420 | 2.173486  | 2.956636  |
| 70  | 6 | 0 | -7.550746 | 3.598535  | 1.585957  |
| 71  | 1 | 0 | -7.741279 | 1.470633  | 1.855350  |
| 72  | 6 | 0 | -5.786923 | 3.604120  | 3.341998  |
| 73  | 1 | 0 | -6.033961 | 1.473207  | 3.544912  |
| 74  | 6 | 0 | -7.250050 | 3.909338  | 3.046835  |
| 75  | 1 | 0 | -8.613646 | 3.732277  | 1.368325  |
| 76  | 1 | 0 | -6.991760 | 4.281703  | 0.935583  |
| 77  | 1 | 0 | -5.565603 | 3.743511  | 4.403367  |
| 78  | 1 | 0 | -5.141937 | 4.287994  | 2.777650  |
| 79  | 1 | 0 | -7.478687 | 4.953631  | 3.274301  |
| 80  | 1 | 0 | -7.886921 | 3.289119  | 3.688030  |
| 81  | 7 | 0 | -5.716766 | 1.975812  | 1.514140  |
| 82  | 7 | 0 | 5.404957  | -0.621983 | 1.187606  |
| 83  | 7 | 0 | 5.716685  | -1.975887 | 1.514248  |
| 84  | 6 | 0 | 7.159953  | -2.167902 | 1.227666  |
| 85  | 6 | 0 | 5.417482  | -2.173420 | 2.956793  |
| 86  | 6 | 0 | 7.550560  | -3.598738 | 1.586016  |
| 87  | 1 | 0 | 7.741280  | -1.470820 | 1.855157  |
| 88  | 6 | 0 | 5.786936  | -3.604041 | 3.342249  |
| 89  | 1 | 0 | 6.034129  | -1.473128 | 3.544941  |
| 90  | 6 | 0 | 7.250013  | -3.909371 | 3.046959  |
| 91  | 1 | 0 | 8.613426  | -3.732577 | 1.368274  |
| 92  | 1 | 0 | 6.991451  | -4.281937 | 0.935780  |
| 93  | 1 | 0 | 5.565720  | -3.743319 | 4.403655  |
| 94  | 1 | 0 | 5.141849  | -4.287929 | 2.778034  |
| 95  | 1 | 0 | 7.478616  | -4.953653 | 3.274510  |
| 96  | 1 | 0 | 7.886989  | -3.289118 | 3.688017  |
| 97  | 6 | 0 | -7.447351 | 1.880434  | -0.239991 |
| 98  | 1 | 0 | -6.802914 | 2.494060  | -0.877111 |
| 99  | 1 | 0 | -7.283685 | 0.831159  | -0.491083 |
| 100 | 1 | 0 | -8.488481 | 2.122513  | -0.465513 |
| 101 | 6 | 0 | -3.944915 | 1.911555  | 3.244479  |
| 102 | 1 | 0 | -3.666719 | 0.869661  | 3.081073  |
| 103 | 1 | 0 | -3.316679 | 2.542428  | 2.607943  |
| 104 | 1 | 0 | -3.730717 | 2.155878  | 4.287551  |
| 105 | 6 | 0 | 3.945024  | -1.911370 | 3.244767  |
| 106 | 1 | 0 | 3.666874  | -0.869477 | 3.081281  |
| 107 | 1 | 0 | 3.316681  | -2.542274 | 2.608366  |
| 108 | 1 | 0 | 3.730923  | -2.155570 | 4.287888  |
| 109 | 6 | 0 | 7.447065  | -1.880830 | -0.240104 |
| 110 | 1 | 0 | 6.802508  | -2.494487 | -0.877073 |
| 111 | 1 | 0 | 7.283438  | -0.831573 | -0.491295 |
| 112 | 1 | 0 | 8.488150  | -2.123006 | -0.465726 |

-----

**Structure 16bb  $\chi = 175.2^\circ$  (vacuum)**

Energy (Hartrees): = -2224.3852161

No imaginary frequencies

Standard orientation:

| Center<br>Number | Atomic<br>Number | Atomic<br>Type | Coordinates (Angstroms) |           |           |
|------------------|------------------|----------------|-------------------------|-----------|-----------|
|                  |                  |                | X                       | Y         | Z         |
| 1                | 6                | 0              | -5.100609               | -2.609795 | -0.597536 |
| 2                | 6                | 0              | -4.124304               | -2.864077 | -1.501474 |
| 3                | 6                | 0              | -2.940896               | -2.002686 | -1.506887 |
| 4                | 6                | 0              | -2.908185               | -0.809454 | -0.735553 |
| 5                | 6                | 0              | -4.055549               | -0.462346 | 0.104348  |
| 6                | 6                | 0              | -5.124098               | -1.409597 | 0.239966  |
| 7                | 6                | 0              | 3.990530                | 5.366591  | -1.648640 |
| 8                | 6                | 0              | -0.549838               | 2.053881  | -3.084979 |
| 9                | 6                | 0              | -4.242767               | -4.066374 | -2.423565 |
| 10               | 6                | 0              | -1.715091               | -0.053226 | -0.777783 |
| 11               | 6                | 0              | -0.607212               | -0.433793 | -1.533086 |
| 12               | 6                | 0              | -0.647332               | -1.625894 | -2.276320 |
| 13               | 6                | 0              | -1.804237               | -2.378161 | -2.249415 |
| 14               | 6                | 0              | -5.579041               | -4.114057 | -3.178865 |
| 15               | 6                | 0              | -3.990512               | -5.366505 | -1.649058 |
| 16               | 6                | 0              | 0.549930                | -2.053741 | -3.085073 |
| 17               | 6                | 0              | -4.212929               | 0.768273  | 0.747479  |

|     |   |   |           |           |           |
|-----|---|---|-----------|-----------|-----------|
| 18  | 6 | 0 | 4.212927  | -0.768312 | 0.747557  |
| 19  | 6 | 0 | 0.607270  | 0.433854  | -1.533048 |
| 20  | 6 | 0 | 0.647404  | 1.625995  | -2.276218 |
| 21  | 6 | 0 | 1.804305  | 2.378266  | -2.249241 |
| 22  | 6 | 0 | 2.940946  | 2.002757  | -1.506702 |
| 23  | 6 | 0 | 2.908220  | 0.809483  | -0.735434 |
| 24  | 6 | 0 | 1.715130  | 0.053253  | -0.777737 |
| 25  | 6 | 0 | 4.242820  | 4.066512  | -2.423224 |
| 26  | 6 | 0 | 5.579112  | 4.114260  | -3.178489 |
| 27  | 6 | 0 | 4.124348  | 2.864156  | -1.501211 |
| 28  | 6 | 0 | 5.100634  | 2.609826  | -0.597266 |
| 29  | 6 | 0 | 5.124111  | 1.409581  | 0.240167  |
| 30  | 6 | 0 | 4.055565  | 0.462335  | 0.104477  |
| 31  | 1 | 0 | 3.497337  | -1.566176 | 0.622009  |
| 32  | 1 | 0 | 1.810159  | 3.302869  | -2.808081 |
| 33  | 1 | 0 | -3.497342 | 1.566146  | 0.621980  |
| 34  | 1 | 0 | -1.810080 | -3.302735 | -2.808304 |
| 35  | 1 | 0 | 6.708270  | 2.944602  | 0.250074  |
| 36  | 1 | 0 | 4.035117  | 6.227582  | -2.320689 |
| 37  | 1 | 0 | -3.478223 | -3.978183 | -3.194372 |
| 38  | 8 | 0 | 1.642860  | -1.097050 | -0.046137 |
| 39  | 1 | 0 | -5.535209 | -4.900211 | -3.937043 |
| 40  | 1 | 0 | -5.771144 | -3.164843 | -3.683947 |
| 41  | 1 | 0 | -6.411473 | -4.323378 | -2.510096 |
| 42  | 1 | 0 | -4.035103 | -6.227453 | -2.321162 |
| 43  | 1 | 0 | -3.008087 | -5.351876 | -1.170833 |
| 44  | 1 | 0 | -4.749371 | -5.493322 | -0.874318 |
| 45  | 1 | 0 | -0.858742 | 1.260735  | -3.770651 |
| 46  | 1 | 0 | -0.323312 | 2.948891  | -3.664547 |
| 47  | 1 | 0 | -1.406387 | 2.268020  | -2.439161 |
| 48  | 8 | 0 | -6.173590 | -3.408458 | -0.419586 |
| 49  | 1 | 0 | -6.708267 | -2.944612 | 0.249746  |
| 50  | 8 | 0 | -6.124208 | -1.271678 | 0.982239  |
| 51  | 1 | 0 | 0.323417  | -2.948722 | -3.664692 |
| 52  | 1 | 0 | 1.406463  | -2.267912 | -2.439246 |
| 53  | 1 | 0 | 0.858850  | -1.260559 | -3.770698 |
| 54  | 8 | 0 | -1.642836 | 1.097037  | -0.046121 |
| 55  | 8 | 0 | 6.124204  | 1.271623  | 0.982454  |
| 56  | 1 | 0 | 3.008097  | 5.351913  | -1.170433 |
| 57  | 1 | 0 | 4.749374  | 5.493373  | -0.873879 |
| 58  | 8 | 0 | 6.173605  | 3.408487  | -0.419241 |
| 59  | 1 | 0 | 3.478296  | 3.978361  | -3.194055 |
| 60  | 1 | 0 | 5.535288  | 4.900463  | -3.936617 |
| 61  | 1 | 0 | 5.771240  | 3.165081  | -3.683627 |
| 62  | 1 | 0 | 6.411525  | 4.323550  | -2.509687 |
| 63  | 1 | 0 | -0.745435 | 1.448152  | -0.124207 |
| 64  | 1 | 0 | 0.745462  | -1.448163 | -0.124265 |
| 65  | 7 | 0 | -5.226206 | 1.085613  | 1.536738  |
| 66  | 6 | 0 | -6.499876 | 3.056499  | 1.572564  |
| 67  | 6 | 0 | -5.316578 | 2.281483  | 3.549067  |
| 68  | 6 | 0 | -6.552011 | 4.479109  | 2.118053  |
| 69  | 1 | 0 | -7.410840 | 2.505607  | 1.864680  |
| 70  | 1 | 0 | -6.439802 | 3.055132  | 0.483170  |
| 71  | 6 | 0 | -5.334442 | 3.680141  | 4.153764  |
| 72  | 1 | 0 | -6.199672 | 1.713004  | 3.889877  |
| 73  | 1 | 0 | -4.423819 | 1.732635  | 3.852177  |
| 74  | 6 | 0 | -6.539826 | 4.471244  | 3.646419  |
| 75  | 1 | 0 | -7.446162 | 4.977005  | 1.736281  |
| 76  | 1 | 0 | -5.681339 | 5.026985  | 1.745010  |
| 77  | 1 | 0 | -5.350097 | 3.599350  | 5.243044  |
| 78  | 1 | 0 | -4.410447 | 4.194232  | 3.872420  |
| 79  | 1 | 0 | -6.520912 | 5.491396  | 4.035558  |
| 80  | 1 | 0 | -7.460664 | 4.002515  | 4.012710  |
| 81  | 7 | 0 | -5.304433 | 2.371841  | 2.083236  |
| 82  | 7 | 0 | 5.226184  | -1.085695 | 1.536823  |
| 83  | 7 | 0 | 5.304378  | -2.371944 | 2.083278  |
| 84  | 6 | 0 | 6.499832  | -3.056598 | 1.572628  |
| 85  | 6 | 0 | 5.316467  | -2.281640 | 3.549113  |
| 86  | 6 | 0 | 6.551927  | -4.479229 | 2.118066  |
| 87  | 1 | 0 | 7.410792  | -2.505729 | 1.864801  |
| 88  | 1 | 0 | 6.439802  | -3.055189 | 0.483231  |
| 89  | 6 | 0 | 5.334286  | -3.680321 | 4.153759  |
| 90  | 1 | 0 | 6.199556  | -1.713186 | 3.889979  |
| 91  | 1 | 0 | 4.423703  | -1.732791 | 3.852209  |
| 92  | 6 | 0 | 6.539679  | -4.471422 | 3.646433  |
| 93  | 1 | 0 | 7.446087  | -4.977123 | 1.736313  |
| 94  | 1 | 0 | 5.681262  | -5.027080 | 1.744967  |
| 95  | 1 | 0 | 5.349899  | -3.599571 | 5.243042  |
| 96  | 1 | 0 | 4.410295  | -4.194388 | 3.872357  |
| 97  | 1 | 0 | 6.520734  | -5.491589 | 4.035532  |
| 98  | 1 | 0 | 7.460510  | -4.002721 | 4.012778  |
| 99  | 1 | 0 | -5.955232 | 0.384417  | 1.704415  |
| 100 | 1 | 0 | 5.955210  | -0.384513 | 1.704552  |

-----  
**Structure 16bb (CHCl<sub>3</sub>)**

Energy (Hartrees): = -2224.4320195  
 No imaginary frequencies

Standard orientation:

| Center<br>Number | Atomic<br>Number | Atomic<br>Type | Coordinates (Angstroms) |           |           |
|------------------|------------------|----------------|-------------------------|-----------|-----------|
|                  |                  |                | X                       | Y         | Z         |
| 1                | 6                | 0              | -5.088865               | -2.640634 | -0.589421 |
| 2                | 6                | 0              | -4.107709               | -2.893587 | -1.490051 |
| 3                | 6                | 0              | -2.931583               | -2.022232 | -1.495695 |
| 4                | 6                | 0              | -2.909996               | -0.828271 | -0.724051 |
| 5                | 6                | 0              | -4.066768               | -0.484092 | 0.104724  |
| 6                | 6                | 0              | -5.124488               | -1.438184 | 0.244141  |
| 7                | 6                | 0              | 3.931236                | 5.395241  | -1.617535 |
| 8                | 6                | 0              | -0.563324               | 2.054824  | -3.060084 |
| 9                | 6                | 0              | -4.207514               | -4.106376 | -2.402098 |
| 10               | 6                | 0              | -1.716166               | -0.067393 | -0.753832 |
| 11               | 6                | 0              | -0.605190               | -0.437801 | -1.508880 |
| 12               | 6                | 0              | -0.636936               | -1.629272 | -2.256421 |
| 13               | 6                | 0              | -1.789455               | -2.389010 | -2.236800 |
| 14               | 6                | 0              | -5.540925               | -4.186864 | -3.157965 |
| 15               | 6                | 0              | -3.931240               | -5.395165 | -1.617969 |
| 16               | 6                | 0              | 0.563416                | -2.054693 | -3.060170 |
| 17               | 6                | 0              | -4.240826               | 0.760214  | 0.730271  |
| 18               | 6                | 0              | 4.240812                | -0.760252 | 0.730369  |
| 19               | 6                | 0              | 0.605241                | 0.437858  | -1.508840 |
| 20               | 6                | 0              | 0.637006                | 1.629366  | -2.256320 |
| 21               | 6                | 0              | 1.789520                | 2.389109  | -2.236625 |
| 22               | 6                | 0              | 2.931627                | 2.022300  | -1.495502 |
| 23               | 6                | 0              | 2.910023                | 0.828298  | -0.723921 |
| 24               | 6                | 0              | 1.716196                | 0.067418  | -0.753775 |
| 25               | 6                | 0              | 4.207560                | 4.106512  | -2.401745 |
| 26               | 6                | 0              | 5.540995                | 4.187081  | -3.157562 |
| 27               | 6                | 0              | 4.107748                | 2.893661  | -1.489781 |
| 28               | 6                | 0              | 5.088887                | 2.640660  | -0.589144 |
| 29               | 6                | 0              | 5.124494                | 1.438164  | 0.244351  |
| 30               | 6                | 0              | 4.066775                | 0.484081  | 0.104867  |
| 31               | 1                | 0              | 3.535984                | -1.564245 | 0.584199  |
| 32               | 1                | 0              | 1.785546                | 3.312045  | -2.798752 |
| 33               | 1                | 0              | -3.536002               | 1.564219  | 0.584142  |
| 34               | 1                | 0              | -1.785467               | -3.311920 | -2.798970 |
| 35               | 1                | 0              | 6.703013                | 2.995159  | 0.253340  |
| 36               | 1                | 0              | 3.960124                | 6.262376  | -2.283117 |
| 37               | 1                | 0              | -3.444236               | -4.013410 | -3.173102 |
| 38               | 8                | 0              | 1.657246                | -1.071065 | -0.007619 |
| 39               | 1                | 0              | -5.477214               | -4.971056 | -3.917440 |
| 40               | 1                | 0              | -5.758479               | -3.243992 | -3.666183 |
| 41               | 1                | 0              | -6.372155               | -4.419165 | -2.494332 |
| 42               | 1                | 0              | -3.960131               | -6.262252 | -2.283612 |
| 43               | 1                | 0              | -2.947975               | -5.362096 | -1.141318 |
| 44               | 1                | 0              | -4.684963               | -5.534980 | -0.839356 |
| 45               | 1                | 0              | -0.861586               | 1.272360  | -3.763125 |
| 46               | 1                | 0              | -0.346313               | 2.962730  | -3.623848 |
| 47               | 1                | 0              | -1.423320               | 2.251386  | -2.412676 |
| 48               | 8                | 0              | -6.155834               | -3.450420 | -0.413281 |
| 49               | 1                | 0              | -6.703014               | -2.995180 | 0.253005  |
| 50               | 8                | 0              | -6.129035               | -1.305629 | 0.985259  |
| 51               | 1                | 0              | 0.346429                | -2.962588 | -3.623962 |
| 52               | 1                | 0              | 1.423402                | -2.251258 | -2.412749 |
| 53               | 1                | 0              | 0.861681                | -1.272207 | -3.763185 |
| 54               | 8                | 0              | -1.657234               | 1.071052  | -0.007616 |
| 55               | 8                | 0              | 6.129026                | 1.305571  | 0.985483  |
| 56               | 1                | 0              | 2.947959                | 5.362116  | -1.140913 |
| 57               | 1                | 0              | 4.684935                | 5.535021  | -0.838893 |
| 58               | 8                | 0              | 6.155848                | 3.450439  | -0.412931 |
| 59               | 1                | 0              | 3.444309                | 4.013583  | -3.172779 |
| 60               | 1                | 0              | 5.477286                | 4.971314  | -3.916995 |
| 61               | 1                | 0              | 5.758595                | 3.244245  | -3.665827 |
| 62               | 1                | 0              | 6.372196                | 4.419368  | -2.493888 |
| 63               | 1                | 0              | -0.760200               | 1.431838  | -0.052228 |
| 64               | 1                | 0              | 0.760211                | -1.431845 | -0.052263 |
| 65               | 7                | 0              | -5.250608               | 1.083338  | 1.511705  |
| 66               | 6                | 0              | -6.548041               | 3.037398  | 1.533156  |
| 67               | 6                | 0              | -5.350948               | 2.286636  | 3.514698  |
| 68               | 6                | 0              | -6.628086               | 4.458019  | 2.079242  |
| 69               | 1                | 0              | -7.444562               | 2.466396  | 1.827224  |
| 70               | 1                | 0              | -6.487679               | 3.038907  | 0.443455  |
| 71               | 6                | 0              | -5.398711               | 3.684468  | 4.118073  |
| 72               | 1                | 0              | -6.224051               | 1.701107  | 3.848117  |
| 73               | 1                | 0              | -4.447707               | 1.757064  | 3.821827  |
| 74               | 6                | 0              | -6.617393               | 4.452356  | 3.607412  |
| 75               | 1                | 0              | -7.533218               | 4.934111  | 1.695247  |
| 76               | 1                | 0              | -5.769844               | 5.026059  | 1.706259  |
| 77               | 1                | 0              | -5.417895               | 3.599208  | 5.207200  |
| 78               | 1                | 0              | -4.483279               | 4.218503  | 3.843530  |
| 79               | 1                | 0              | -6.615600               | 5.473871  | 3.994063  |
| 80               | 1                | 0              | -7.529865               | 3.967334  | 3.973344  |

|     |   |   |           |           |          |
|-----|---|---|-----------|-----------|----------|
| 81  | 7 | 0 | -5.336161 | 2.376496  | 2.045576 |
| 82  | 7 | 0 | 5.250577  | -1.083415 | 1.511808 |
| 83  | 7 | 0 | 5.336105  | -2.376593 | 2.045636 |
| 84  | 6 | 0 | 6.547981  | -3.037495 | 1.533210 |
| 85  | 6 | 0 | 5.350874  | -2.286782 | 3.514762 |
| 86  | 6 | 0 | 6.628000  | -4.458136 | 2.079251 |
| 87  | 1 | 0 | 7.444507  | -2.466515 | 1.827308 |
| 88  | 1 | 0 | 6.487634  | -3.038969 | 0.443509 |
| 89  | 6 | 0 | 5.398609  | -3.684635 | 4.118091 |
| 90  | 1 | 0 | 6.223981  | -1.701277 | 3.848211 |
| 91  | 1 | 0 | 4.447636  | -1.757207 | 3.821896 |
| 92  | 6 | 0 | 6.617286  | -4.452523 | 3.607421 |
| 93  | 1 | 0 | 7.533130  | -4.934227 | 1.695252 |
| 94  | 1 | 0 | 5.769756  | -5.026152 | 1.706237 |
| 95  | 1 | 0 | 5.417780  | -3.599411 | 5.207221 |
| 96  | 1 | 0 | 4.483173  | -4.218647 | 3.843519 |
| 97  | 1 | 0 | 6.615474  | -5.474051 | 3.994038 |
| 98  | 1 | 0 | 7.529762  | -3.967527 | 3.973381 |
| 99  | 1 | 0 | -5.975143 | 0.386746  | 1.708650 |
| 100 | 1 | 0 | 5.975116  | -0.386838 | 1.708792 |

### Structure 16bb (DMSO)

Energy (Hartrees): = -2224.4220489

No imaginary frequencies

Standard orientation:

| Center<br>Number | Atomic<br>Number | Atomic<br>Type | Coordinates (Angstroms) |           |           |
|------------------|------------------|----------------|-------------------------|-----------|-----------|
|                  |                  |                | X                       | Y         | Z         |
| 1                | 6                | 0              | 5.070000                | 2.662963  | -0.565567 |
| 2                | 6                | 0              | 4.096598                | 2.906920  | -1.477357 |
| 3                | 6                | 0              | 2.924825                | 2.029401  | -1.488614 |
| 4                | 6                | 0              | 2.902145                | 0.839804  | -0.709107 |
| 5                | 6                | 0              | 4.054432                | 0.503787  | 0.128838  |
| 6                | 6                | 0              | 5.105329                | 1.462935  | 0.273016  |
| 7                | 6                | 0              | -3.908122               | -5.406111 | -1.621637 |
| 8                | 6                | 0              | 0.555467                | -2.035997 | -3.083838 |
| 9                | 6                | 0              | 4.198007                | 4.114487  | -2.395835 |
| 10               | 6                | 0              | 1.709375                | 0.076581  | -0.739375 |
| 11               | 6                | 0              | 0.604802                | 0.438402  | -1.507681 |
| 12               | 6                | 0              | 0.639596                | 1.622056  | -2.267479 |
| 13               | 6                | 0              | 1.788359                | 2.387397  | -2.243316 |
| 14               | 6                | 0              | 5.537829                | 4.197117  | -3.138685 |
| 15               | 6                | 0              | 3.908415                | 5.406102  | -1.622272 |
| 16               | 6                | 0              | -0.555465               | 2.035992  | -3.083922 |
| 17               | 6                | 0              | 4.236008                | -0.744940 | 0.747178  |
| 18               | 6                | 0              | -4.235994               | 0.745060  | 0.747377  |
| 19               | 6                | 0              | -0.604722               | -0.438325 | -1.507622 |
| 20               | 6                | 0              | -0.639548               | -1.622024 | -2.267345 |
| 21               | 6                | 0              | -1.788294               | -2.387381 | -2.243048 |
| 22               | 6                | 0              | -2.924710               | -2.029362 | -1.488284 |
| 23               | 6                | 0              | -2.902016               | -0.839705 | -0.708864 |
| 24               | 6                | 0              | -1.709248               | -0.076467 | -0.739266 |
| 25               | 6                | 0              | -4.197847               | -4.114569 | -2.395275 |
| 26               | 6                | 0              | -5.537713               | -4.197338 | -3.138030 |
| 27               | 6                | 0              | -4.096445               | -2.906930 | -1.476891 |
| 28               | 6                | 0              | -5.069796               | -2.662959 | -0.565051 |
| 29               | 6                | 0              | -5.105110               | -1.462882 | 0.273458  |
| 30               | 6                | 0              | -4.054284               | -0.503687 | 0.129126  |
| 31               | 1                | 0              | -3.540203               | 1.554635  | 0.588277  |
| 32               | 1                | 0              | -1.784996               | -3.306257 | -2.812121 |
| 33               | 1                | 0              | 3.540081                | -1.554419 | 0.588161  |
| 34               | 1                | 0              | 1.785037                | 3.306234  | -2.812448 |
| 35               | 1                | 0              | -6.666915               | -3.013621 | 0.295352  |
| 36               | 1                | 0              | -3.943083               | -6.269193 | -2.292113 |
| 37               | 1                | 0              | 3.442200                | 4.015226  | -3.173152 |
| 38               | 8                | 0              | -1.642855               | 1.050872  | 0.022053  |
| 39               | 1                | 0              | 5.479548                | 4.982035  | -3.897706 |
| 40               | 1                | 0              | 5.761653                | 3.255502  | -3.647070 |
| 41               | 1                | 0              | 6.362934                | 4.429317  | -2.467082 |
| 42               | 1                | 0              | 3.943391                | 6.269133  | -2.292813 |
| 43               | 1                | 0              | 2.917975                | 5.372803  | -1.160500 |
| 44               | 1                | 0              | 4.651184                | 5.553114  | -0.834148 |
| 45               | 1                | 0              | 0.850006                | -1.242416 | -3.776204 |
| 46               | 1                | 0              | 0.333947                | -2.934869 | -3.660026 |
| 47               | 1                | 0              | 1.418633                | -2.245000 | -2.444290 |
| 48               | 8                | 0              | 6.132858                | 3.475005  | -0.378313 |
| 49               | 1                | 0              | 6.667205                | 3.013611  | 0.294689  |
| 50               | 8                | 0              | 6.104745                | 1.341049  | 1.022276  |
| 51               | 1                | 0              | -0.333978               | 2.934836  | -3.660166 |
| 52               | 1                | 0              | -1.418595               | 2.245024  | -2.444335 |
| 53               | 1                | 0              | -0.850044               | 1.242378  | -3.776234 |
| 54               | 8                | 0              | 1.643072                | -1.050716 | 0.022015  |
| 55               | 8                | 0              | -6.104527               | -1.340912 | 1.022703  |

|     |   |   |           |           |           |
|-----|---|---|-----------|-----------|-----------|
| 56  | 1 | 0 | -2.917655 | -5.372714 | -1.159932 |
| 57  | 1 | 0 | -4.650830 | -5.553115 | -0.833455 |
| 58  | 8 | 0 | -6.132607 | -3.475032 | -0.377670 |
| 59  | 1 | 0 | -3.442098 | -4.015317 | -3.172649 |
| 60  | 1 | 0 | -5.479427 | -4.982296 | -3.897010 |
| 61  | 1 | 0 | -5.761639 | -3.255769 | -3.646456 |
| 62  | 1 | 0 | -6.362756 | -4.429557 | -2.466360 |
| 63  | 1 | 0 | 0.754141  | -1.426790 | -0.055549 |
| 64  | 1 | 0 | -0.753920 | 1.426920  | -0.055609 |
| 65  | 7 | 0 | 5.241414  | -1.067022 | 1.531016  |
| 66  | 6 | 0 | 6.545449  | -3.013731 | 1.486624  |
| 67  | 6 | 0 | 5.399849  | -2.297266 | 3.511377  |
| 68  | 6 | 0 | 6.651852  | -4.439901 | 2.011960  |
| 69  | 1 | 0 | 7.442530  | -2.437697 | 1.766131  |
| 70  | 1 | 0 | 6.454118  | -3.002051 | 0.399083  |
| 71  | 6 | 0 | 5.475640  | -3.702419 | 4.094391  |
| 72  | 1 | 0 | 6.279503  | -1.710927 | 3.823401  |
| 73  | 1 | 0 | 4.502278  | -1.778646 | 3.852473  |
| 74  | 6 | 0 | 6.685383  | -4.452928 | 3.539514  |
| 75  | 1 | 0 | 7.550009  | -4.902486 | 1.596348  |
| 76  | 1 | 0 | 5.788614  | -5.012096 | 1.656471  |
| 77  | 1 | 0 | 5.525541  | -3.629278 | 5.183389  |
| 78  | 1 | 0 | 4.557095  | -4.241682 | 3.840632  |
| 79  | 1 | 0 | 6.703987  | -5.479284 | 3.912910  |
| 80  | 1 | 0 | 7.603096  | -3.962390 | 3.884021  |
| 81  | 7 | 0 | 5.341669  | -2.369104 | 2.041384  |
| 82  | 7 | 0 | -5.241432 | 1.067022  | 1.531223  |
| 83  | 7 | 0 | -5.341900 | 2.369115  | 2.041520  |
| 84  | 6 | 0 | -6.545812 | 3.013498  | 1.486763  |
| 85  | 6 | 0 | -5.400020 | 2.297349  | 3.511519  |
| 86  | 6 | 0 | -6.652457 | 4.439677  | 2.012025  |
| 87  | 1 | 0 | -7.442781 | 2.437316  | 1.766330  |
| 88  | 1 | 0 | -6.454513 | 3.001774  | 0.399219  |
| 89  | 6 | 0 | -5.476046 | 3.702521  | 4.094458  |
| 90  | 1 | 0 | -6.279561 | 1.710870  | 3.823602  |
| 91  | 1 | 0 | -4.502346 | 1.778908  | 3.852616  |
| 92  | 6 | 0 | -6.685942 | 4.452781  | 3.539579  |
| 93  | 1 | 0 | -7.550711 | 4.902076  | 1.596417  |
| 94  | 1 | 0 | -5.789334 | 5.012010  | 1.656476  |
| 95  | 1 | 0 | -5.525900 | 3.629431  | 5.183462  |
| 96  | 1 | 0 | -4.557606 | 4.241935  | 3.840642  |
| 97  | 1 | 0 | -6.704718 | 5.479155  | 3.912919  |
| 98  | 1 | 0 | -7.603555 | 3.962097  | 3.884142  |
| 99  | 1 | 0 | 5.964916  | -0.373428 | 1.741208  |
| 100 | 1 | 0 | -5.964808 | 0.373317  | 1.741482  |

-----  
**Structure 16bb  $\chi = 36.6^\circ$  (vacuum)**

Energy (Hartrees): = -2224.3745815  
 No imaginary frequencies

Standard orientation:

| Center<br>Number | Atomic<br>Number | Atomic<br>Type | Coordinates (Angstroms) |           |           |
|------------------|------------------|----------------|-------------------------|-----------|-----------|
|                  |                  |                | X                       | Y         | Z         |
| 1                | 6                | 0              | -4.702502               | -3.033706 | -0.270307 |
| 2                | 6                | 0              | -3.763978               | -3.154000 | -1.241415 |
| 3                | 6                | 0              | -2.705258               | -2.141920 | -1.318661 |
| 4                | 6                | 0              | -2.773205               | -0.970772 | -0.523373 |
| 5                | 6                | 0              | -3.949145               | -0.738730 | 0.318008  |
| 6                | 6                | 0              | -4.855443               | -1.831405 | 0.554879  |
| 7                | 6                | 0              | 3.560431                | 5.764182  | -0.719159 |
| 8                | 6                | 0              | -0.768306               | 2.400881  | -2.447589 |
| 9                | 6                | 0              | -3.781172               | -4.365118 | -2.158161 |
| 10               | 6                | 0              | -1.654586               | -0.114294 | -0.508984 |
| 11               | 6                | 0              | -0.549662               | -0.310867 | -1.332810 |
| 12               | 6                | 0              | -0.527942               | -1.431506 | -2.183741 |
| 13               | 6                | 0              | -1.581098               | -2.329592 | -2.140200 |
| 14               | 6                | 0              | -5.128751               | -4.542207 | -2.872606 |
| 15               | 6                | 0              | -3.379372               | -5.632461 | -1.391466 |
| 16               | 6                | 0              | 0.645021                | -1.661638 | -3.101959 |
| 17               | 6                | 0              | -4.372500               | 0.529054  | 0.704643  |
| 18               | 6                | 0              | 4.433809                | -0.632978 | 0.550757  |
| 19               | 6                | 0              | 0.600438                | 0.636325  | -1.272991 |
| 20               | 6                | 0              | 0.511571                | 1.927220  | -1.811447 |
| 21               | 6                | 0              | 1.613834                | 2.753596  | -1.729022 |
| 22               | 6                | 0              | 2.818081                | 2.358428  | -1.117687 |
| 23               | 6                | 0              | 2.916614                | 1.058245  | -0.555563 |
| 24               | 6                | 0              | 1.776259                | 0.231182  | -0.650066 |
| 25               | 6                | 0              | 3.897989                | 4.650492  | -1.719143 |
| 26               | 6                | 0              | 5.186144                | 4.966857  | -2.492737 |
| 27               | 6                | 0              | 3.933141                | 3.302662  | -1.018710 |
| 28               | 6                | 0              | 4.975334                | 2.986902  | -0.213614 |
| 29               | 6                | 0              | 5.138775                | 1.670022  | 0.402661  |
| 30               | 6                | 0              | 4.138037                | 0.671764  | 0.154841  |

|     |   |   |           |           |           |
|-----|---|---|-----------|-----------|-----------|
| 31  | 1 | 0 | 3.779329  | -1.457361 | 0.311628  |
| 32  | 1 | 0 | 1.515441  | 3.754179  | -2.125023 |
| 33  | 1 | 0 | -3.864772 | 1.423951  | 0.360175  |
| 34  | 1 | 0 | -1.507494 | -3.211955 | -2.759793 |
| 35  | 1 | 0 | 6.598593  | 3.310544  | 0.608168  |
| 36  | 1 | 0 | 3.491804  | 6.729198  | -1.228529 |
| 37  | 1 | 0 | -3.047166 | -4.207151 | -2.946918 |
| 38  | 8 | 0 | 1.833753  | -1.018839 | -0.092698 |
| 39  | 1 | 0 | -5.045096 | -5.345434 | -3.609066 |
| 40  | 1 | 0 | -5.410390 | -3.627506 | -3.398807 |
| 41  | 1 | 0 | -5.921376 | -4.796846 | -2.171214 |
| 42  | 1 | 0 | -3.354729 | -6.492402 | -2.065527 |
| 43  | 1 | 0 | -2.390043 | -5.518060 | -0.942042 |
| 44  | 1 | 0 | -4.099493 | -5.835503 | -0.597197 |
| 45  | 1 | 0 | -1.135161 | 1.681757  | -3.184612 |
| 46  | 1 | 0 | -0.620640 | 3.360713  | -2.943569 |
| 47  | 1 | 0 | -1.548117 | 2.520776  | -1.690257 |
| 48  | 8 | 0 | -5.642250 | -3.973636 | -0.030527 |
| 49  | 1 | 0 | -6.213187 | -3.583307 | 0.653587  |
| 50  | 8 | 0 | -5.834654 | -1.794417 | 1.327574  |
| 51  | 1 | 0 | 0.446758  | -2.492130 | -3.779542 |
| 52  | 1 | 0 | 1.551216  | -1.887540 | -2.532990 |
| 53  | 1 | 0 | 0.854818  | -0.766534 | -3.692005 |
| 54  | 8 | 0 | -1.601251 | 0.969178  | 0.330560  |
| 55  | 8 | 0 | 6.189987  | 1.492626  | 1.062482  |
| 56  | 1 | 0 | 2.608046  | 5.567060  | -0.221120 |
| 57  | 1 | 0 | 4.340430  | 5.830379  | 0.042314  |
| 58  | 8 | 0 | 5.991678  | 3.835433  | 0.056083  |
| 59  | 1 | 0 | 3.109094  | 4.619115  | -2.469719 |
| 60  | 1 | 0 | 5.027743  | 5.859073  | -3.104291 |
| 61  | 1 | 0 | 5.451109  | 4.141337  | -3.157084 |
| 62  | 1 | 0 | 6.022878  | 5.150342  | -1.821821 |
| 63  | 1 | 0 | -2.021651 | 0.731607  | 1.164650  |
| 64  | 1 | 0 | 0.949942  | -1.405098 | -0.127673 |
| 65  | 7 | 0 | -5.431914 | 0.783828  | 1.461933  |
| 66  | 6 | 0 | -7.122701 | 2.300747  | 0.871293  |
| 67  | 6 | 0 | -6.045385 | 2.387105  | 3.051991  |
| 68  | 6 | 0 | -7.583486 | 3.747068  | 1.002442  |
| 69  | 1 | 0 | -7.904149 | 1.618344  | 1.247451  |
| 70  | 1 | 0 | -6.924120 | 2.044870  | -0.170889 |
| 71  | 6 | 0 | -6.476541 | 3.836063  | 3.244615  |
| 72  | 1 | 0 | -6.799545 | 1.708847  | 3.488124  |
| 73  | 1 | 0 | -5.091585 | 2.192837  | 3.544753  |
| 74  | 6 | 0 | -7.763766 | 4.122629  | 2.472618  |
| 75  | 1 | 0 | -8.515608 | 3.877161  | 0.448190  |
| 76  | 1 | 0 | -6.831508 | 4.396934  | 0.544931  |
| 77  | 1 | 0 | -6.608402 | 4.030821  | 4.311236  |
| 78  | 1 | 0 | -5.676369 | 4.489666  | 2.884565  |
| 79  | 1 | 0 | -8.042288 | 5.174070  | 2.568742  |
| 80  | 1 | 0 | -8.581940 | 3.531532  | 2.900481  |
| 81  | 7 | 0 | -5.872381 | 2.102376  | 1.621749  |
| 82  | 7 | 0 | 5.517562  | -0.995422 | 1.221900  |
| 83  | 7 | 0 | 5.726131  | -2.345833 | 1.523180  |
| 84  | 6 | 0 | 6.982469  | -2.802946 | 0.916053  |
| 85  | 6 | 0 | 5.726529  | -2.535266 | 2.979454  |
| 86  | 6 | 0 | 7.172812  | -4.292074 | 1.182761  |
| 87  | 1 | 0 | 7.835988  | -2.234801 | 1.326174  |
| 88  | 1 | 0 | 6.924581  | -2.599033 | -0.154121 |
| 89  | 6 | 0 | 5.875449  | -4.016381 | 3.305856  |
| 90  | 1 | 0 | 6.549524  | -1.962462 | 3.441644  |
| 91  | 1 | 0 | 4.784138  | -2.141070 | 3.362551  |
| 92  | 6 | 0 | 7.153485  | -4.577963 | 2.683984  |
| 93  | 1 | 0 | 8.113316  | -4.620617 | 0.734414  |
| 94  | 1 | 0 | 6.361889  | -4.839106 | 0.692239  |
| 95  | 1 | 0 | 5.877818  | -4.147820 | 4.390323  |
| 96  | 1 | 0 | 5.006422  | -4.549436 | 2.908344  |
| 97  | 1 | 0 | 7.232948  | -5.650980 | 2.871396  |
| 98  | 1 | 0 | 8.022687  | -4.103167 | 3.154073  |
| 99  | 1 | 0 | -5.997600 | -0.008784 | 1.783127  |
| 100 | 1 | 0 | 6.193501  | -0.271995 | 1.488745  |

-----

**Structure 16bb  $\chi = 77.9^\circ$  (vacuum)**

Energy (Hartrees): = -2224.3736051  
Imaginary frequency -310.56

Standard orientation:

| Center<br>Number | Atomic<br>Number | Atomic<br>Type | Coordinates (Angstroms) |           |           |
|------------------|------------------|----------------|-------------------------|-----------|-----------|
|                  |                  |                | X                       | Y         | Z         |
| 1                | 6                | 0              | -4.839533               | -2.941765 | -0.366712 |
| 2                | 6                | 0              | -3.865634               | -3.127882 | -1.290646 |
| 3                | 6                | 0              | -2.772696               | -2.154554 | -1.353224 |
| 4                | 6                | 0              | -2.828433               | -0.950386 | -0.600128 |
| 5                | 6                | 0              | -4.006385               | -0.672111 | 0.222675  |

|    |   |   |           |           |           |
|----|---|---|-----------|-----------|-----------|
| 6  | 6 | 0 | -4.970699 | -1.716238 | 0.425542  |
| 7  | 6 | 0 | 3.614035  | 5.667688  | -1.070262 |
| 8  | 6 | 0 | -0.710052 | 2.243014  | -2.708593 |
| 9  | 6 | 0 | -3.888114 | -4.367524 | -2.169415 |
| 10 | 6 | 0 | -1.693627 | -0.114463 | -0.626874 |
| 11 | 6 | 0 | -0.571191 | -0.383775 | -1.402915 |
| 12 | 6 | 0 | -0.543250 | -1.555443 | -2.182344 |
| 13 | 6 | 0 | -1.627590 | -2.412737 | -2.126958 |
| 14 | 6 | 0 | -5.219357 | -4.541486 | -2.914746 |
| 15 | 6 | 0 | -3.534439 | -5.617027 | -1.351627 |
| 16 | 6 | 0 | 0.649807  | -1.867162 | -3.049589 |
| 17 | 6 | 0 | -4.335172 | 0.597794  | 0.698766  |
| 18 | 6 | 0 | 4.358059  | -0.652274 | 0.634039  |
| 19 | 6 | 0 | 0.593471  | 0.547083  | -1.372129 |
| 20 | 6 | 0 | 0.541481  | 1.799300  | -1.999773 |
| 21 | 6 | 0 | 1.652054  | 2.615766  | -1.934382 |
| 22 | 6 | 0 | 2.829059  | 2.248134  | -1.255937 |
| 23 | 6 | 0 | 2.891592  | 0.986057  | -0.609239 |
| 24 | 6 | 0 | 1.744363  | 0.166685  | -0.690068 |
| 25 | 6 | 0 | 3.965465  | 4.478582  | -1.973879 |
| 26 | 6 | 0 | 5.286026  | 4.715364  | -2.720717 |
| 27 | 6 | 0 | 3.952757  | 3.184015  | -1.178465 |
| 28 | 6 | 0 | 4.958490  | 2.912619  | -0.312704 |
| 29 | 6 | 0 | 5.081386  | 1.637463  | 0.394937  |
| 30 | 6 | 0 | 4.082250  | 0.632721  | 0.166642  |
| 31 | 1 | 0 | 3.713491  | -1.486920 | 0.402983  |
| 32 | 1 | 0 | 1.581322  | 3.589117  | -2.398461 |
| 33 | 1 | 0 | -3.738720 | 1.463927  | 0.445344  |
| 34 | 1 | 0 | -1.565526 | -3.325699 | -2.702087 |
| 35 | 1 | 0 | 6.553705  | 3.274351  | 0.548016  |
| 36 | 1 | 0 | 3.586322  | 6.594222  | -1.649973 |
| 37 | 1 | 0 | -3.132332 | -4.250426 | -2.944765 |
| 38 | 8 | 0 | 1.769115  | -1.047027 | -0.053004 |
| 39 | 1 | 0 | -5.127908 | -5.361918 | -3.631082 |
| 40 | 1 | 0 | -5.473960 | -3.634890 | -3.468094 |
| 41 | 1 | 0 | -6.034312 | -4.768825 | -2.230095 |
| 42 | 1 | 0 | -3.514380 | -6.500521 | -1.994878 |
| 43 | 1 | 0 | -2.554025 | -5.510289 | -0.881067 |
| 44 | 1 | 0 | -4.278344 | -5.776042 | -0.568941 |
| 45 | 1 | 0 | -1.064932 | 1.476411  | -3.402333 |
| 46 | 1 | 0 | -0.531800 | 3.161949  | -3.267837 |
| 47 | 1 | 0 | -1.509874 | 2.426151  | -1.985925 |
| 48 | 8 | 0 | -5.823549 | -3.836821 | -0.137921 |
| 49 | 1 | 0 | -6.396908 | -3.404925 | 0.519708  |
| 50 | 8 | 0 | -5.972249 | -1.636286 | 1.170827  |
| 51 | 1 | 0 | 0.449526  | -2.731856 | -3.682589 |
| 52 | 1 | 0 | 1.535546  | -2.080069 | -2.444268 |
| 53 | 1 | 0 | 0.897147  | -1.014261 | -3.685824 |
| 54 | 8 | 0 | -1.671596 | 1.055475  | 0.112979  |
| 55 | 8 | 0 | 6.102689  | 1.493174  | 1.107191  |
| 56 | 1 | 0 | 2.638818  | 5.525079  | -0.598385 |
| 57 | 1 | 0 | 4.365221  | 5.774066  | -0.284747 |
| 58 | 8 | 0 | 5.974976  | 3.766472  | -0.061393 |
| 59 | 1 | 0 | 3.203159  | 4.404341  | -2.748627 |
| 60 | 1 | 0 | 5.169381  | 5.565398  | -3.398081 |
| 61 | 1 | 0 | 5.555484  | 3.840634  | -3.316942 |
| 62 | 1 | 0 | 6.102966  | 4.928596  | -2.034382 |
| 63 | 1 | 0 | -1.499295 | 0.841105  | 1.036567  |
| 64 | 1 | 0 | 0.894260  | -1.447494 | -0.130659 |
| 65 | 7 | 0 | -5.390608 | 0.877007  | 1.447216  |
| 66 | 6 | 0 | -6.890827 | 2.639094  | 1.038591  |
| 67 | 6 | 0 | -5.852583 | 2.337953  | 3.215705  |
| 68 | 6 | 0 | -7.174101 | 4.106802  | 1.336658  |
| 69 | 1 | 0 | -7.755073 | 2.018707  | 1.331890  |
| 70 | 1 | 0 | -6.708228 | 2.482401  | -0.025712 |
| 71 | 6 | 0 | -6.108882 | 3.795608  | 3.579740  |
| 72 | 1 | 0 | -6.692923 | 1.710868  | 3.561921  |
| 73 | 1 | 0 | -4.939952 | 1.969816  | 3.686698  |
| 74 | 6 | 0 | -7.335851 | 4.328879  | 2.840293  |
| 75 | 1 | 0 | -8.071621 | 4.415280  | 0.795909  |
| 76 | 1 | 0 | -6.338422 | 4.706202  | 0.962963  |
| 77 | 1 | 0 | -6.237914 | 3.877206  | 4.661414  |
| 78 | 1 | 0 | -5.227933 | 4.383577  | 3.305116  |
| 79 | 1 | 0 | -7.484954 | 5.388390  | 3.058228  |
| 80 | 1 | 0 | -8.229124 | 3.798090  | 3.189994  |
| 81 | 7 | 0 | -5.685784 | 2.208402  | 1.763201  |
| 82 | 7 | 0 | 5.411818  | -0.983880 | 1.366322  |
| 83 | 7 | 0 | 5.626189  | -2.324687 | 1.704571  |
| 84 | 6 | 0 | 6.887398  | -2.790084 | 1.112660  |
| 85 | 6 | 0 | 5.624448  | -2.475547 | 3.165207  |
| 86 | 6 | 0 | 7.086016  | -4.270267 | 1.417594  |
| 87 | 1 | 0 | 7.735942  | -2.205954 | 1.510194  |
| 88 | 1 | 0 | 6.831121  | -2.614119 | 0.037423  |
| 89 | 6 | 0 | 5.782447  | -3.946693 | 3.530528  |
| 90 | 1 | 0 | 6.442756  | -1.885453 | 3.613867  |
| 91 | 1 | 0 | 4.678766  | -2.077712 | 3.536144  |
| 92 | 6 | 0 | 7.064826  | -4.517147 | 2.925788  |
| 93 | 1 | 0 | 8.029561  | -4.604690 | 0.980138  |

|     |   |   |           |           |          |
|-----|---|---|-----------|-----------|----------|
| 94  | 1 | 0 | 6.279578  | -4.834722 | 0.939577 |
| 95  | 1 | 0 | 5.783990  | -4.049286 | 4.618141 |
| 96  | 1 | 0 | 4.917200  | -4.495483 | 3.146395 |
| 97  | 1 | 0 | 7.149417  | -5.584486 | 3.141239 |
| 98  | 1 | 0 | 7.930467  | -4.025768 | 3.385267 |
| 99  | 1 | 0 | -6.026979 | 0.112086  | 1.697389 |
| 100 | 1 | 0 | 6.081805  | -0.250280 | 1.620404 |

-----  
**Structure 16bb  $\chi = 279.0^\circ$  (vacuum)**

Energy (Hartrees): = -2224.3722425  
Imaginary frequency -314.00

Standard orientation:

| Center<br>Number | Atomic<br>Number | Atomic<br>Type | Coordinates (Angstroms) |           |           |
|------------------|------------------|----------------|-------------------------|-----------|-----------|
|                  |                  |                | X                       | Y         | Z         |
| 1                | 6                | 0              | 5.467624                | 2.037359  | -1.024180 |
| 2                | 6                | 0              | 4.356145                | 2.683231  | -1.452799 |
| 3                | 6                | 0              | 3.081122                | 1.962820  | -1.423392 |
| 4                | 6                | 0              | 2.973869                | 0.700657  | -0.779307 |
| 5                | 6                | 0              | 4.148659                | 0.131381  | -0.117561 |
| 6                | 6                | 0              | 5.428045                | 0.746972  | -0.330548 |
| 7                | 6                | 0              | -4.326893               | -4.920618 | -2.401559 |
| 8                | 6                | 0              | 0.370021                | -1.580775 | -3.529841 |
| 9                | 6                | 0              | 4.470509                | 4.081932  | -2.035321 |
| 10               | 6                | 0              | 1.742765                | 0.020491  | -0.885287 |
| 11               | 6                | 0              | 0.638173                | 0.555313  | -1.538843 |
| 12               | 6                | 0              | 0.739210                | 1.825594  | -2.134410 |
| 13               | 6                | 0              | 1.951684                | 2.487091  | -2.077151 |
| 14               | 6                | 0              | 5.094350                | 4.029624  | -3.436344 |
| 15               | 6                | 0              | 5.227992                | 5.054947  | -1.120240 |
| 16               | 6                | 0              | -0.447032               | 2.423191  | -2.844988 |
| 17               | 6                | 0              | 4.084486                | -0.896227 | 0.824721  |
| 18               | 6                | 0              | -4.105605               | 0.774470  | 0.895603  |
| 19               | 6                | 0              | -0.623755               | -0.234231 | -1.641851 |
| 20               | 6                | 0              | -0.761184               | -1.257477 | -2.588799 |
| 21               | 6                | 0              | -1.954563               | -1.948589 | -2.647368 |
| 22               | 6                | 0              | -3.039187               | -1.665479 | -1.796463 |
| 23               | 6                | 0              | -2.914025               | -0.624323 | -0.838107 |
| 24               | 6                | 0              | -1.680014               | 0.060486  | -0.789601 |
| 25               | 6                | 0              | -4.479636               | -3.501732 | -2.965742 |
| 26               | 6                | 0              | -5.822288               | -3.326565 | -3.690178 |
| 27               | 6                | 0              | -4.263338               | -2.465217 | -1.875153 |
| 28               | 6                | 0              | -5.194187               | -2.316014 | -0.902325 |
| 29               | 6                | 0              | -5.126977               | -1.268618 | 0.116837  |
| 30               | 6                | 0              | -4.016428               | -0.361021 | 0.087876  |
| 31               | 1                | 0              | -3.366329               | 1.559940  | 0.850080  |
| 32               | 1                | 0              | -2.029817               | -2.753372 | -3.364132 |
| 33               | 1                | 0              | 3.135293                | -1.297770 | 1.153339  |
| 34               | 1                | 0              | 2.023666                | 3.435791  | -2.590362 |
| 35               | 1                | 0              | -6.789385               | -2.709444 | -0.055295 |
| 36               | 1                | 0              | -4.447755               | -5.662679 | -3.195217 |
| 37               | 1                | 0              | 3.466215                | 4.493364  | -2.129499 |
| 38               | 8                | 0              | -1.522412               | 1.055948  | 0.136064  |
| 39               | 1                | 0              | 5.146235                | 5.031877  | -3.869347 |
| 40               | 1                | 0              | 4.504956                | 3.394782  | -4.102323 |
| 41               | 1                | 0              | 6.106801                | 3.625145  | -3.379917 |
| 42               | 1                | 0              | 5.136675                | 6.068298  | -1.519461 |
| 43               | 1                | 0              | 4.806171                | 5.047325  | -0.112740 |
| 44               | 1                | 0              | 6.284521                | 4.802756  | -1.053412 |
| 45               | 1                | 0              | 0.727673                | -0.683424 | -4.041597 |
| 46               | 1                | 0              | 0.054198                | -2.305978 | -4.280109 |
| 47               | 1                | 0              | 1.228687                | -2.004200 | -2.998837 |
| 48               | 8                | 0              | 6.711135                | 2.549981  | -1.132186 |
| 49               | 1                | 0              | 7.281374                | 1.898900  | -0.686272 |
| 50               | 8                | 0              | 6.518271                | 0.310505  | 0.100558  |
| 51               | 1                | 0              | -0.184687               | 3.376025  | -3.305001 |
| 52               | 1                | 0              | -1.272088               | 2.590411  | -2.146869 |
| 53               | 1                | 0              | -0.819429               | 1.748507  | -3.619994 |
| 54               | 8                | 0              | 1.582536                | -1.225969 | -0.305303 |
| 55               | 8                | 0              | -6.094841               | -1.204906 | 0.911312  |
| 56               | 1                | 0              | -3.341339               | -5.055148 | -1.949220 |
| 57               | 1                | 0              | -5.085188               | -5.103550 | -1.638107 |
| 58               | 8                | 0              | -6.303569               | -3.082564 | -0.812443 |
| 59               | 1                | 0              | -3.715996               | -3.361817 | -3.729310 |
| 60               | 1                | 0              | -5.865360               | -4.008658 | -4.543449 |
| 61               | 1                | 0              | -5.927868               | -2.306334 | -4.065624 |
| 62               | 1                | 0              | -6.662349               | -3.541357 | -3.032261 |
| 63               | 1                | 0              | 1.961495                | -1.893717 | -0.887854 |
| 64               | 1                | 0              | -0.596439               | 1.328417  | 0.130706  |
| 65               | 7                | 0              | 5.132395                | -1.441770 | 1.421379  |
| 66               | 6                | 0              | 5.582919                | -3.671761 | 1.978057  |
| 67               | 6                | 0              | 5.487339                | -1.942803 | 3.685515  |
| 68               | 6                | 0              | 5.332594                | -4.760024 | 3.015111  |



|     |   |   |           |           |          |
|-----|---|---|-----------|-----------|----------|
| 69  | 1 | 0 | 6.668321  | -3.522317 | 1.842435 |
| 70  | 1 | 0 | 5.157031  | -3.945124 | 1.011382 |
| 71  | 6 | 0 | 5.238663  | -2.981778 | 4.772892 |
| 72  | 1 | 0 | 6.569668  | -1.746531 | 3.591885 |
| 73  | 1 | 0 | 4.992120  | -0.999807 | 3.921950 |
| 74  | 6 | 0 | 5.853471  | -4.326182 | 4.384459 |
| 75  | 1 | 0 | 5.813801  | -5.684513 | 2.688061 |
| 76  | 1 | 0 | 4.256157  | -4.947453 | 3.071631 |
| 77  | 1 | 0 | 5.653664  | -2.618503 | 5.715841 |
| 78  | 1 | 0 | 4.158626  | -3.094618 | 4.907742 |
| 79  | 1 | 0 | 5.629365  | -5.083380 | 5.138712 |
| 80  | 1 | 0 | 6.944399  | -4.226150 | 4.341484 |
| 81  | 7 | 0 | 4.944809  | -2.419112 | 2.405652 |
| 82  | 7 | 0 | -5.084665 | 1.013319  | 1.754813 |
| 83  | 7 | 0 | -5.130485 | 2.233185  | 2.439692 |
| 84  | 6 | 0 | -6.302655 | 3.001978  | 1.998531 |
| 85  | 6 | 0 | -5.160537 | 1.980992  | 3.885534 |
| 86  | 6 | 0 | -6.327734 | 4.355374  | 2.698297 |
| 87  | 1 | 0 | -7.230114 | 2.445548  | 2.219587 |
| 88  | 1 | 0 | -6.230204 | 3.120030  | 0.916187 |
| 89  | 6 | 0 | -5.153479 | 3.303910  | 4.642764 |
| 90  | 1 | 0 | -6.059419 | 1.398782  | 4.154104 |
| 91  | 1 | 0 | -4.283742 | 1.381182  | 4.133360 |
| 92  | 6 | 0 | -6.334198 | 4.175659  | 4.216006 |
| 93  | 1 | 0 | -7.205425 | 4.915425  | 2.367339 |
| 94  | 1 | 0 | -5.440147 | 4.920542  | 2.397844 |
| 95  | 1 | 0 | -5.182909 | 3.103435  | 5.716174 |
| 96  | 1 | 0 | -4.214820 | 3.823604  | 4.427789 |
| 97  | 1 | 0 | -6.296352 | 5.145079  | 4.717703 |
| 98  | 1 | 0 | -7.270073 | 3.691570  | 4.519221 |
| 99  | 1 | 0 | 6.067330  | -1.098431 | 1.176588 |
| 100 | 1 | 0 | -5.836105 | 0.320020  | 1.841230 |

-----

**Structure 16bb  $\chi = 326.2^\circ$  (vacuum)**

Energy (Hartrees): = -2224.3742355  
 No imaginary frequencies

Standard orientation:

| Center<br>Number | Atomic<br>Number | Atomic<br>Type | Coordinates (Angstroms) |           |           |
|------------------|------------------|----------------|-------------------------|-----------|-----------|
|                  |                  |                | X                       | Y         | Z         |
| 1                | 6                | 0              | 5.534868                | 1.207679  | -1.753780 |
| 2                | 6                | 0              | 4.440698                | 1.718827  | -2.370884 |
| 3                | 6                | 0              | 3.132177                | 1.120165  | -2.086198 |
| 4                | 6                | 0              | 2.998829                | 0.139267  | -1.072125 |
| 5                | 6                | 0              | 4.154569                | -0.197905 | -0.237969 |
| 6                | 6                | 0              | 5.460294                | 0.237919  | -0.657032 |
| 7                | 6                | 0              | -4.646744               | -5.331212 | -0.637197 |
| 8                | 6                | 0              | 0.238917                | -2.846406 | -2.813947 |
| 9                | 6                | 0              | 4.607720                | 2.832001  | -3.391105 |
| 10               | 6                | 0              | 1.764014                | -0.529504 | -0.954611 |
| 11               | 6                | 0              | 0.642109                | -0.161963 | -1.692266 |
| 12               | 6                | 0              | 0.760236                | 0.873171  | -2.637699 |
| 13               | 6                | 0              | 1.995712                | 1.464712  | -2.838070 |
| 14               | 6                | 0              | 5.297029                | 2.309892  | -4.658984 |
| 15               | 6                | 0              | 5.339019                | 4.052120  | -2.812382 |
| 16               | 6                | 0              | -0.436825               | 1.285770  | -3.454851 |
| 17               | 6                | 0              | 4.037623                | -0.698514 | 1.054902  |
| 18               | 6                | 0              | -4.012893               | 1.103538  | 0.584116  |
| 19               | 6                | 0              | -0.651669               | -0.881360 | -1.507699 |
| 20               | 6                | 0              | -0.859979               | -2.155908 | -2.051082 |
| 21               | 6                | 0              | -2.088691               | -2.757230 | -1.869375 |
| 22               | 6                | 0              | -3.140413               | -2.144425 | -1.162745 |
| 23               | 6                | 0              | -2.941864               | -0.851926 | -0.607728 |
| 24               | 6                | 0              | -1.673693               | -0.260148 | -0.798961 |
| 25               | 6                | 0              | -4.700850               | -4.180722 | -1.651075 |
| 26               | 6                | 0              | -6.030399               | -4.170128 | -2.419800 |
| 27               | 6                | 0              | -4.408411               | -2.852018 | -0.973245 |
| 28               | 6                | 0              | -5.317825               | -2.329079 | -0.116191 |
| 29               | 6                | 0              | -5.174667               | -1.009547 | 0.496949  |
| 30               | 6                | 0              | -4.010945               | -0.232388 | 0.178934  |
| 31               | 1                | 0              | -3.222865               | 1.781352  | 0.299154  |
| 32               | 1                | 0              | -2.218583               | -3.750940 | -2.272593 |
| 33               | 1                | 0              | 3.067426                | -0.834679 | 1.521846  |
| 34               | 1                | 0              | 2.071167                | 2.201813  | -3.624376 |
| 35               | 1                | 0              | -6.921144               | -2.320264 | 0.803210  |
| 36               | 1                | 0              | -4.822788               | -6.287735 | -1.136602 |
| 37               | 1                | 0              | 3.619388                | 3.187891  | -3.676698 |
| 38               | 8                | 0              | -1.446750               | 0.980188  | -0.263693 |
| 39               | 1                | 0              | 5.373166                | 3.106318  | -5.403640 |
| 40               | 1                | 0              | 4.732321                | 1.482912  | -5.095774 |
| 41               | 1                | 0              | 6.302878                | 1.957365  | -4.425566 |
| 42               | 1                | 0              | 5.326593                | 4.863565  | -3.544475 |
| 43               | 1                | 0              | 4.843391                | 4.405265  | -1.905378 |

|     |   |   |           |           |           |
|-----|---|---|-----------|-----------|-----------|
| 44  | 1 | 0 | 6.375171  | 3.819259  | -2.572799 |
| 45  | 1 | 0 | 0.651447  | -2.193555 | -3.587750 |
| 46  | 1 | 0 | -0.131057 | -3.755760 | -3.288397 |
| 47  | 1 | 0 | 1.060245  | -3.117184 | -2.145316 |
| 48  | 8 | 0 | 6.794829  | 1.607113  | -2.031282 |
| 49  | 1 | 0 | 7.350717  | 1.134664  | -1.387705 |
| 50  | 8 | 0 | 6.530276  | -0.060789 | -0.088293 |
| 51  | 1 | 0 | -0.156828 | 2.025763  | -4.204646 |
| 52  | 1 | 0 | -1.213259 | 1.715707  | -2.815838 |
| 53  | 1 | 0 | -0.881371 | 0.423407  | -3.957491 |
| 54  | 8 | 0 | 1.607576  | -1.586986 | -0.095875 |
| 55  | 8 | 0 | -6.126890 | -0.627336 | 1.218088  |
| 56  | 1 | 0 | -3.670794 | -5.372009 | -0.147597 |
| 57  | 1 | 0 | -5.412500 | -5.194482 | 0.128401  |
| 58  | 8 | 0 | -6.469660 | -2.953414 | 0.216922  |
| 59  | 1 | 0 | -3.932217 | -4.361701 | -2.400434 |
| 60  | 1 | 0 | -6.126404 | -5.097648 | -2.990380 |
| 61  | 1 | 0 | -6.062966 | -3.333984 | -3.121817 |
| 62  | 1 | 0 | -6.880876 | -4.088401 | -1.745387 |
| 63  | 1 | 0 | 2.438082  | -2.074946 | -0.061585 |
| 64  | 1 | 0 | -0.511591 | 1.189720  | -0.377186 |
| 65  | 7 | 0 | 5.051078  | -1.005035 | 1.854950  |
| 66  | 6 | 0 | 5.474212  | -2.592969 | 3.522465  |
| 67  | 6 | 0 | 5.247583  | -0.233150 | 4.065973  |
| 68  | 6 | 0 | 5.154128  | -2.990295 | 4.958579  |
| 69  | 1 | 0 | 6.566103  | -2.490430 | 3.394269  |
| 70  | 1 | 0 | 5.120806  | -3.348088 | 2.818881  |
| 71  | 6 | 0 | 4.918411  | -0.562134 | 5.517323  |
| 72  | 1 | 0 | 6.333111  | -0.070962 | 3.950255  |
| 73  | 1 | 0 | 4.734134  | 0.673914  | 3.742561  |
| 74  | 6 | 0 | 5.565652  | -1.884100 | 5.929565  |
| 75  | 1 | 0 | 5.665017  | -3.926754 | 5.193118  |
| 76  | 1 | 0 | 4.077869  | -3.170438 | 5.038554  |
| 77  | 1 | 0 | 5.258262  | 0.256191  | 6.156056  |
| 78  | 1 | 0 | 3.831491  | -0.634873 | 5.620752  |
| 79  | 1 | 0 | 5.284200  | -2.147087 | 6.951368  |
| 80  | 1 | 0 | 6.656292  | -1.773964 | 5.913244  |
| 81  | 7 | 0 | 4.802258  | -1.330052 | 3.193031  |
| 82  | 7 | 0 | -4.959318 | 1.669336  | 1.318621  |
| 83  | 7 | 0 | -4.905825 | 3.041928  | 1.586755  |
| 84  | 6 | 0 | -6.024683 | 3.720731  | 0.918045  |
| 85  | 6 | 0 | -4.931276 | 3.258909  | 3.038324  |
| 86  | 6 | 0 | -5.935891 | 5.223707  | 1.157125  |
| 87  | 1 | 0 | -6.987217 | 3.334095  | 1.295630  |
| 88  | 1 | 0 | -5.962527 | 3.487162  | -0.145994 |
| 89  | 6 | 0 | -4.809989 | 4.747544  | 3.341387  |
| 90  | 1 | 0 | -5.867793 | 2.862864  | 3.468854  |
| 91  | 1 | 0 | -4.099138 | 2.700402  | 3.469215  |
| 92  | 6 | 0 | -5.928616 | 5.530513  | 2.654325  |
| 93  | 1 | 0 | -6.774384 | 5.717350  | 0.660450  |
| 94  | 1 | 0 | -5.013643 | 5.595631  | 0.700365  |
| 95  | 1 | 0 | -4.835656 | 4.897194  | 4.423185  |
| 96  | 1 | 0 | -3.838574 | 5.098843  | 2.980288  |
| 97  | 1 | 0 | -5.808953 | 6.602375  | 2.826571  |
| 98  | 1 | 0 | -6.892599 | 5.238885  | 3.087493  |
| 99  | 1 | 0 | 6.004051  | -0.851911 | 1.509568  |
| 100 | 1 | 0 | -5.754869 | 1.093812  | 1.615633  |

### Structure 16dd (vacuum)

Energy (Hartrees): = -2224.3777353  
 No imaginary frequencies

Standard orientation:

| Center<br>Number | Atomic<br>Number | Atomic<br>Type | Coordinates (Angstroms) |           |           |
|------------------|------------------|----------------|-------------------------|-----------|-----------|
|                  |                  |                | X                       | Y         | Z         |
| 1                | 6                | 0              | -5.212938               | 2.397126  | 0.493632  |
| 2                | 6                | 0              | -4.242844               | 2.687115  | 1.393040  |
| 3                | 6                | 0              | -3.022026               | 1.877980  | 1.384804  |
| 4                | 6                | 0              | -2.943368               | 0.688969  | 0.610163  |
| 5                | 6                | 0              | -4.083047               | 0.295537  | -0.220118 |
| 6                | 6                | 0              | -5.191545               | 1.199388  | -0.349365 |
| 7                | 6                | 0              | 4.211297                | -5.192082 | 1.564047  |
| 8                | 6                | 0              | -0.471667               | -2.072885 | 2.943585  |
| 9                | 6                | 0              | -4.406858               | 3.875019  | 2.326543  |
| 10               | 6                | 0              | -1.719112               | -0.014711 | 0.641953  |
| 11               | 6                | 0              | -0.623708               | 0.409871  | 1.392330  |
| 12               | 6                | 0              | -0.709432               | 1.597997  | 2.137580  |
| 13               | 6                | 0              | -1.897577               | 2.300944  | 2.118864  |
| 14               | 6                | 0              | -5.741378               | 3.861240  | 3.086552  |
| 15               | 6                | 0              | -4.211415               | 5.192084  | 1.564469  |
| 16               | 6                | 0              | 0.471764                | 2.072594  | 2.943738  |
| 17               | 6                | 0              | -4.195499               | -0.939946 | -0.856829 |
| 18               | 6                | 0              | 4.195518                | 0.940021  | -0.856811 |

|     |   |   |           |           |           |
|-----|---|---|-----------|-----------|-----------|
| 19  | 6 | 0 | 0.623775  | -0.410015 | 1.392301  |
| 20  | 6 | 0 | 0.709517  | -1.598196 | 2.137465  |
| 21  | 6 | 0 | 1.897686  | -2.301100 | 2.118722  |
| 22  | 6 | 0 | 3.022142  | -1.878050 | 1.384714  |
| 23  | 6 | 0 | 2.943464  | -0.688984 | 0.610157  |
| 24  | 6 | 0 | 1.719191  | 0.014668  | 0.642003  |
| 25  | 6 | 0 | 4.406955  | -3.875157 | 2.326304  |
| 26  | 6 | 0 | 5.741536  | -3.861681 | 3.086198  |
| 27  | 6 | 0 | 4.242992  | -2.687147 | 1.392937  |
| 28  | 6 | 0 | 5.213115  | -2.397056 | 0.493604  |
| 29  | 6 | 0 | 5.191717  | -1.199244 | -0.349289 |
| 30  | 6 | 0 | 4.083157  | -0.295456 | -0.220064 |
| 31  | 1 | 0 | 3.430770  | 1.687857  | -0.711617 |
| 32  | 1 | 0 | 1.939393  | -3.223893 | 2.679163  |
| 33  | 1 | 0 | -3.430821 | -1.687849 | -0.711605 |
| 34  | 1 | 0 | -1.939261 | 3.223716  | 2.679345  |
| 35  | 1 | 0 | 6.840503  | -2.666095 | -0.340428 |
| 36  | 1 | 0 | 4.291690  | -6.043418 | 2.244984  |
| 37  | 1 | 0 | -3.636685 | 3.810241  | 3.094191  |
| 38  | 8 | 0 | 1.599570  | 1.161710  | -0.093102 |
| 39  | 1 | 0 | -5.724845 | 4.637630  | 3.855714  |
| 40  | 1 | 0 | -5.896069 | 2.898311  | 3.578383  |
| 41  | 1 | 0 | -6.583414 | 4.048557  | 2.423360  |
| 42  | 1 | 0 | -4.291867 | 6.043292  | 2.245557  |
| 43  | 1 | 0 | -3.230269 | 5.225532  | 1.084486  |
| 44  | 1 | 0 | -4.976527 | 5.294544  | 0.792184  |
| 45  | 1 | 0 | -0.808235 | -1.295311 | 3.634203  |
| 46  | 1 | 0 | -0.213853 | -2.962381 | 3.518460  |
| 47  | 1 | 0 | -1.320931 | -2.313116 | 2.297420  |
| 48  | 8 | 0 | -6.319655 | 3.149356  | 0.326489  |
| 49  | 1 | 0 | -6.840299 | 2.666248  | -0.340432 |
| 50  | 8 | 0 | -6.186038 | 1.018145  | -1.084575 |
| 51  | 1 | 0 | 0.213967  | 2.962040  | 3.518700  |
| 52  | 1 | 0 | 1.321031  | 2.312873  | 2.297590  |
| 53  | 1 | 0 | 0.808324  | 1.294948  | 3.634277  |
| 54  | 8 | 0 | -1.599507 | -1.161665 | -0.093295 |
| 55  | 8 | 0 | 6.186222  | -1.017946 | -1.084472 |
| 56  | 1 | 0 | 3.230129  | -5.225329 | 1.084093  |
| 57  | 1 | 0 | 4.976365  | -5.294483 | 0.791705  |
| 58  | 8 | 0 | 6.319833  | -3.149271 | 0.326424  |
| 59  | 1 | 0 | 3.636848  | -3.810354 | 3.094019  |
| 60  | 1 | 0 | 5.724814  | -4.637967 | 3.855461  |
| 61  | 1 | 0 | 5.896566  | -2.898735 | 3.577888  |
| 62  | 1 | 0 | 6.583470  | -4.049345 | 2.422977  |
| 63  | 1 | 0 | -0.687490 | -1.473264 | -0.015558 |
| 64  | 1 | 0 | 0.687557  | 1.473306  | -0.015296 |
| 65  | 7 | 0 | -5.195707 | -1.315279 | -1.642084 |
| 66  | 6 | 0 | -4.170219 | -2.830337 | -3.160067 |
| 67  | 6 | 0 | -5.381829 | -3.647048 | -1.206538 |
| 68  | 6 | 0 | -4.412321 | -4.141861 | -3.898797 |
| 69  | 1 | 0 | -3.199513 | -2.873919 | -2.636001 |
| 70  | 1 | 0 | -4.141177 | -1.987604 | -3.852407 |
| 71  | 6 | 0 | -5.657417 | -4.980395 | -1.892336 |
| 72  | 1 | 0 | -4.457691 | -3.723745 | -0.607894 |
| 73  | 1 | 0 | -6.197657 | -3.373939 | -0.535408 |
| 74  | 6 | 0 | -4.560718 | -5.297942 | -2.909065 |
| 75  | 1 | 0 | -3.586366 | -4.324010 | -4.590256 |
| 76  | 1 | 0 | -5.327383 | -4.044534 | -4.490718 |
| 77  | 1 | 0 | -5.730287 | -5.766326 | -1.136957 |
| 78  | 1 | 0 | -6.624229 | -4.915943 | -2.400568 |
| 79  | 1 | 0 | -4.783907 | -6.227695 | -3.436693 |
| 80  | 1 | 0 | -3.610692 | -5.446276 | -2.382168 |
| 81  | 7 | 0 | -5.270759 | -2.592475 | -2.219877 |
| 82  | 7 | 0 | 5.195684  | 1.315436  | -1.642080 |
| 83  | 7 | 0 | 5.270593  | 2.592627  | -2.219903 |
| 84  | 6 | 0 | 4.169998  | 2.830397  | -3.160042 |
| 85  | 6 | 0 | 5.381647  | 3.647214  | -1.206581 |
| 86  | 6 | 0 | 4.411987  | 4.141921  | -3.898809 |
| 87  | 1 | 0 | 3.199306  | 2.873942  | -2.635947 |
| 88  | 1 | 0 | 4.140976  | 1.987643  | -3.852358 |
| 89  | 6 | 0 | 5.657105  | 4.980574  | -1.892403 |
| 90  | 1 | 0 | 4.457536  | 3.723847  | -0.607884 |
| 91  | 1 | 0 | 6.197528  | 3.374164  | -0.535491 |
| 92  | 6 | 0 | 4.560342  | 5.298023  | -2.909093 |
| 93  | 1 | 0 | 3.585990  | 4.324010  | -4.590234 |
| 94  | 1 | 0 | 5.327030  | 4.044646  | -4.490767 |
| 95  | 1 | 0 | 5.729936  | 5.766523  | -1.137039 |
| 96  | 1 | 0 | 6.623903  | 4.916197  | -2.400671 |
| 97  | 1 | 0 | 4.783433  | 6.227793  | -3.436733 |
| 98  | 1 | 0 | 3.610326  | 5.446285  | -2.382157 |
| 99  | 1 | 0 | -5.955421 | -0.662493 | -1.820023 |
| 100 | 1 | 0 | 5.955480  | 0.662736  | -1.819988 |

-----  
**Structure 16dd (CHCl<sub>3</sub>)**

Energy (Hartrees) = -2224.4232237

No imaginary frequencies

Standard orientation:

| Center<br>Number | Atomic<br>Number | Atomic<br>Type | Coordinates (Angstroms) |           |           |
|------------------|------------------|----------------|-------------------------|-----------|-----------|
|                  |                  |                | X                       | Y         | Z         |
| 1                | 6                | 0              | 5.203903                | 2.410912  | -0.473692 |
| 2                | 6                | 0              | 4.241661                | 2.693263  | -1.385438 |
| 3                | 6                | 0              | 3.025398                | 1.877203  | -1.385020 |
| 4                | 6                | 0              | 2.946534                | 0.693443  | -0.602018 |
| 5                | 6                | 0              | 4.085636                | 0.305496  | 0.232163  |
| 6                | 6                | 0              | 5.181793                | 1.217112  | 0.373926  |
| 7                | 6                | 0              | -4.191069               | -5.199592 | -1.573352 |
| 8                | 6                | 0              | 0.465495                | -2.063086 | -2.946777 |
| 9                | 6                | 0              | 4.405771                | 3.878915  | -2.323313 |
| 10               | 6                | 0              | 1.718122                | -0.008883 | -0.623353 |
| 11               | 6                | 0              | 0.625335                | 0.408577  | -1.380624 |
| 12               | 6                | 0              | 0.714081                | 1.589390  | -2.139705 |
| 13               | 6                | 0              | 1.902950                | 2.291556  | -2.129609 |
| 14               | 6                | 0              | 5.745867                | 3.874403  | -3.072384 |
| 15               | 6                | 0              | 4.191078                | 5.199527  | -1.573761 |
| 16               | 6                | 0              | -0.465580               | 2.062948  | -2.946876 |
| 17               | 6                | 0              | 4.209095                | -0.943986 | 0.852826  |
| 18               | 6                | 0              | -4.209085               | 0.944034  | 0.852902  |
| 19               | 6                | 0              | -0.625385               | -0.408631 | -1.380587 |
| 20               | 6                | 0              | -0.714148               | -1.589485 | -2.139603 |
| 21               | 6                | 0              | -1.903017               | -2.291650 | -2.129443 |
| 22               | 6                | 0              | -3.025447               | -1.877260 | -1.384848 |
| 23               | 6                | 0              | -2.946565               | -0.693458 | -0.601910 |
| 24               | 6                | 0              | -1.718155               | 0.008869  | -0.623314 |
| 25               | 6                | 0              | -4.405826               | -3.879039 | -2.322989 |
| 26               | 6                | 0              | -5.745951               | -3.874617 | -3.072010 |
| 27               | 6                | 0              | -4.241709               | -2.693322 | -1.385198 |
| 28               | 6                | 0              | -5.203938               | -2.410917 | -0.473455 |
| 29               | 6                | 0              | -5.181809               | -1.217073 | 0.374099  |
| 30               | 6                | 0              | -4.085650               | -0.305470 | 0.232277  |
| 31               | 1                | 0              | -3.463506               | 1.705368  | 0.679163  |
| 32               | 1                | 0              | -1.943545               | -3.208507 | -2.700110 |
| 33               | 1                | 0              | 3.463522                | -1.705335 | 0.679120  |
| 34               | 1                | 0              | 1.943465                | 3.208385  | -2.700321 |
| 35               | 1                | 0              | -6.828764               | -2.704134 | 0.373624  |
| 36               | 1                | 0              | -4.276845               | -6.046052 | -2.260270 |
| 37               | 1                | 0              | 3.643122                | 3.805003  | -3.097144 |
| 38               | 8                | 0              | -1.605357               | 1.139111  | 0.132521  |
| 39               | 1                | 0              | 5.725028                | 4.643582  | -3.849245 |
| 40               | 1                | 0              | 5.917802                | 2.910225  | -3.557741 |
| 41               | 1                | 0              | 6.584189                | 4.079924  | -2.408715 |
| 42               | 1                | 0              | 4.276852                | 6.045935  | -2.260743 |
| 43               | 1                | 0              | 3.201755                | 5.234764  | -1.109990 |
| 44               | 1                | 0              | 4.941954                | 5.318006  | -0.788970 |
| 45               | 1                | 0              | 0.797004                | -1.291226 | -3.646829 |
| 46               | 1                | 0              | 0.209629                | -2.958159 | -3.514780 |
| 47               | 1                | 0              | 1.317481                | -2.298349 | -2.301599 |
| 48               | 8                | 0              | 6.304652                | 3.174133  | -0.301285 |
| 49               | 1                | 0              | 6.828745                | 2.704180  | 0.373342  |
| 50               | 8                | 0              | 6.172098                | 1.045475  | 1.122377  |
| 51               | 1                | 0              | -0.209739               | 2.958013  | -3.514904 |
| 52               | 1                | 0              | -1.317563               | 2.298208  | -2.301694 |
| 53               | 1                | 0              | -0.797081               | 1.291065  | -3.646907 |
| 54               | 8                | 0              | 1.605339                | -1.139080 | 0.132552  |
| 55               | 8                | 0              | -6.172102               | -1.045394 | 1.122557  |
| 56               | 1                | 0              | -3.201728               | -5.234767 | -1.109615 |
| 57               | 1                | 0              | -4.941914               | -5.318036 | -0.788525 |
| 58               | 8                | 0              | -6.304684               | -3.174127 | -0.300985 |
| 59               | 1                | 0              | -3.643209               | -3.805160 | -3.096853 |
| 60               | 1                | 0              | -5.725112               | -4.643838 | -3.848829 |
| 61               | 1                | 0              | -5.917938               | -2.910472 | -3.557415 |
| 62               | 1                | 0              | -6.584242               | -4.080129 | -2.408300 |
| 63               | 1                | 0              | 0.692717                | -1.458564 | 0.088152  |
| 64               | 1                | 0              | -0.692733               | 1.458587  | 0.088094  |
| 65               | 7                | 0              | 5.200113                | -1.315655 | 1.642712  |
| 66               | 6                | 0              | 4.185715                | -2.847075 | 3.148678  |
| 67               | 6                | 0              | 5.393967                | -3.642723 | 1.178320  |
| 68               | 6                | 0              | 4.420998                | -4.171001 | 3.865539  |
| 69               | 1                | 0              | 3.217477                | -2.876028 | 2.621670  |
| 70               | 1                | 0              | 4.162970                | -2.015699 | 3.855414  |
| 71               | 6                | 0              | 5.660804                | -4.986533 | 1.846073  |
| 72               | 1                | 0              | 4.469338                | -3.704133 | 0.581326  |
| 73               | 1                | 0              | 6.213113                | -3.365478 | 0.512360  |
| 74               | 6                | 0              | 4.563054                | -5.312671 | 2.858790  |
| 75               | 1                | 0              | 3.591795                | -4.356643 | 4.552330  |
| 76               | 1                | 0              | 5.335238                | -4.090184 | 4.462091  |
| 77               | 1                | 0              | 5.726317                | -5.759684 | 1.076767  |
| 78               | 1                | 0              | 6.629332                | -4.939257 | 2.353911  |
| 79               | 1                | 0              | 4.783459                | -6.250559 | 3.373792  |
| 80               | 1                | 0              | 3.611893                | -5.448194 | 2.330372  |
| 81               | 7                | 0              | 5.288809                | -2.600147 | 2.208810  |

|     |   |   |           |           |          |
|-----|---|---|-----------|-----------|----------|
| 82  | 7 | 0 | -5.200088 | 1.315741  | 1.642790 |
| 83  | 7 | 0 | -5.288750 | 2.600250  | 2.208856 |
| 84  | 6 | 0 | -4.185641 | 2.847175  | 3.148708 |
| 85  | 6 | 0 | -5.393894 | 3.642801  | 1.178341 |
| 86  | 6 | 0 | -4.420881 | 4.171127  | 3.865535 |
| 87  | 1 | 0 | -3.217408 | 2.876086  | 2.621690 |
| 88  | 1 | 0 | -4.162912 | 2.015817  | 3.855467 |
| 89  | 6 | 0 | -5.660687 | 4.986637  | 1.846060 |
| 90  | 1 | 0 | -4.469270 | 3.704173  | 0.581334 |
| 91  | 1 | 0 | -6.213054 | 3.365560  | 0.512397 |
| 92  | 6 | 0 | -4.562916 | 5.312772  | 2.858755 |
| 93  | 1 | 0 | -3.591666 | 4.356766  | 4.552311 |
| 94  | 1 | 0 | -5.335116 | 4.090352  | 4.462099 |
| 95  | 1 | 0 | -5.726188 | 5.759768  | 1.076734 |
| 96  | 1 | 0 | -6.629210 | 4.939401  | 2.353911 |
| 97  | 1 | 0 | -4.783289 | 6.250681  | 3.373733 |
| 98  | 1 | 0 | -3.611758 | 5.448253  | 2.330322 |
| 99  | 1 | 0 | 5.946054  | -0.656140 | 1.850757 |
| 100 | 1 | 0 | -5.946035 | 0.656243  | 1.850867 |

### Structure 16dd (DMSO)

Energy (Hartrees): = -2224.4135198  
No imaginary frequencies

Standard orientation:

| Center<br>Number | Atomic<br>Number | Atomic<br>Type | Coordinates (Angstroms) |           |           |
|------------------|------------------|----------------|-------------------------|-----------|-----------|
|                  |                  |                | X                       | Y         | Z         |
| 1                | 6                | 0              | 5.182505                | 2.453272  | -0.467283 |
| 2                | 6                | 0              | 4.216208                | 2.730348  | -1.376666 |
| 3                | 6                | 0              | 3.007510                | 1.903397  | -1.374634 |
| 4                | 6                | 0              | 2.939609                | 0.719097  | -0.590483 |
| 5                | 6                | 0              | 4.083647                | 0.338087  | 0.240541  |
| 6                | 6                | 0              | 5.172835                | 1.256834  | 0.377513  |
| 7                | 6                | 0              | -4.114316               | -5.232686 | -1.551572 |
| 8                | 6                | 0              | 0.481053                | -2.056480 | -2.942362 |
| 9                | 6                | 0              | 4.362604                | 3.922613  | -2.308663 |
| 10               | 6                | 0              | 1.715769                | 0.007653  | -0.609750 |
| 11               | 6                | 0              | 0.621448                | 0.414449  | -1.370471 |
| 12               | 6                | 0              | 0.700625                | 1.593939  | -2.132869 |
| 13               | 6                | 0              | 1.882238                | 2.308310  | -2.120950 |
| 14               | 6                | 0              | 5.706783                | 3.952741  | -3.048193 |
| 15               | 6                | 0              | 4.114279                | 5.232611  | -1.552000 |
| 16               | 6                | 0              | -0.481145               | 2.056349  | -2.942455 |
| 17               | 6                | 0              | 4.220987                | -0.916412 | 0.854103  |
| 18               | 6                | 0              | -4.220984               | 0.916460  | 0.854175  |
| 19               | 6                | 0              | -0.621505               | -0.414501 | -1.370436 |
| 20               | 6                | 0              | -0.700699               | -1.594030 | -2.132771 |
| 21               | 6                | 0              | -1.882310               | -2.308404 | -2.120786 |
| 22               | 6                | 0              | -3.007563               | -1.903457 | -1.374462 |
| 23               | 6                | 0              | -2.939648               | -0.719114 | -0.590375 |
| 24               | 6                | 0              | -1.715810               | -0.007669 | -0.609710 |
| 25               | 6                | 0              | -4.362649               | -3.922746 | -2.308334 |
| 26               | 6                | 0              | -5.706822               | -3.952940 | -3.047871 |
| 27               | 6                | 0              | -4.216258               | -2.730413 | -1.376423 |
| 28               | 6                | 0              | -5.182541               | -2.453284 | -0.467042 |
| 29               | 6                | 0              | -5.172861               | -1.256796 | 0.377683  |
| 30               | 6                | 0              | -4.083670               | -0.338062 | 0.240652  |
| 31               | 1                | 0              | -3.479290               | 1.683282  | 0.687303  |
| 32               | 1                | 0              | -1.914458               | -3.225149 | -2.692375 |
| 33               | 1                | 0              | 3.479305                | -1.683252 | 0.687263  |
| 34               | 1                | 0              | 1.914374                | 3.225028  | -2.692584 |
| 35               | 1                | 0              | -6.799104               | -2.742010 | 0.381214  |
| 36               | 1                | 0              | -4.188224               | -6.085628 | -2.231793 |
| 37               | 1                | 0              | 3.606771                | 3.838256  | -3.087933 |
| 38               | 8                | 0              | -1.608008               | 1.115871  | 0.153524  |
| 39               | 1                | 0              | 5.672043                | 4.725221  | -3.821179 |
| 40               | 1                | 0              | 5.904457                | 2.995819  | -3.538612 |
| 41               | 1                | 0              | 6.536433                | 4.173784  | -2.378578 |
| 42               | 1                | 0              | 4.188204                | 6.085501  | -2.232285 |
| 43               | 1                | 0              | 3.119415                | 5.243313  | -1.098811 |
| 44               | 1                | 0              | 4.855566                | 5.360745  | -0.759045 |
| 45               | 1                | 0              | 0.809915                | -1.276746 | -3.635168 |
| 46               | 1                | 0              | 0.227640                | -2.947052 | -3.518321 |
| 47               | 1                | 0              | 1.332777                | -2.297667 | -2.298960 |
| 48               | 8                | 0              | 6.278658                | 3.221746  | -0.290073 |
| 49               | 1                | 0              | 6.799089                | 2.742041  | 0.380919  |
| 50               | 8                | 0              | 6.169414                | 1.096060  | 1.121626  |
| 51               | 1                | 0              | -0.227751               | 2.946906  | -3.518446 |
| 52               | 1                | 0              | -1.332863               | 2.297545  | -2.299049 |
| 53               | 1                | 0              | -0.810006               | 1.276588  | -3.635232 |
| 54               | 8                | 0              | 1.607983                | -1.115844 | 0.153548  |
| 55               | 8                | 0              | -6.169430               | -1.095981 | 1.121801  |
| 56               | 1                | 0              | -3.119457               | -5.243340 | -1.098372 |

|     |   |   |           |           |           |
|-----|---|---|-----------|-----------|-----------|
| 57  | 1 | 0 | -4.855610 | -5.360770 | -0.758615 |
| 58  | 8 | 0 | -6.278685 | -3.221755 | -0.289758 |
| 59  | 1 | 0 | -3.606813 | -3.838442 | -3.087607 |
| 60  | 1 | 0 | -5.672062 | -4.725465 | -3.820812 |
| 61  | 1 | 0 | -5.904509 | -2.996051 | -3.538348 |
| 62  | 1 | 0 | -6.536474 | -4.173959 | -2.378251 |
| 63  | 1 | 0 | 0.703960  | -1.455447 | 0.083071  |
| 64  | 1 | 0 | -0.703986 | 1.455469  | 0.083013  |
| 65  | 7 | 0 | 5.224371  | -1.282572 | 1.627876  |
| 66  | 6 | 0 | 4.267965  | -2.839433 | 3.147808  |
| 67  | 6 | 0 | 5.432919  | -3.605333 | 1.139308  |
| 68  | 6 | 0 | 4.546254  | -4.162263 | 3.850810  |
| 69  | 1 | 0 | 3.289164  | -2.885165 | 2.643143  |
| 70  | 1 | 0 | 4.249689  | -2.011981 | 3.859490  |
| 71  | 6 | 0 | 5.742227  | -4.946701 | 1.793081  |
| 72  | 1 | 0 | 4.491019  | -3.679805 | 0.572987  |
| 73  | 1 | 0 | 6.227183  | -3.311381 | 0.450477  |
| 74  | 6 | 0 | 4.679224  | -5.296040 | 2.834385  |
| 75  | 1 | 0 | 3.738895  | -4.364463 | 4.558666  |
| 76  | 1 | 0 | 5.475064  | -4.069227 | 4.423095  |
| 77  | 1 | 0 | 5.798488  | -5.714534 | 1.017798  |
| 78  | 1 | 0 | 6.724234  | -4.885838 | 2.273528  |
| 79  | 1 | 0 | 4.929820  | -6.232581 | 3.337939  |
| 80  | 1 | 0 | 3.716176  | -5.443086 | 2.331694  |
| 81  | 7 | 0 | 5.343177  | -2.570599 | 2.180575  |
| 82  | 7 | 0 | -5.224351 | 1.282664  | 1.627948  |
| 83  | 7 | 0 | -5.343117 | 2.570707  | 2.180616  |
| 84  | 6 | 0 | -4.267889 | 2.839531  | 3.147834  |
| 85  | 6 | 0 | -5.432835 | 3.605418  | 1.139324  |
| 86  | 6 | 0 | -4.546124 | 4.162391  | 3.850802  |
| 87  | 1 | 0 | -3.289091 | 2.885213  | 2.643160  |
| 88  | 1 | 0 | -4.249637 | 2.012099  | 3.859539  |
| 89  | 6 | 0 | -5.742091 | 4.946813  | 1.793064  |
| 90  | 1 | 0 | -4.490939 | 3.679845  | 0.572991  |
| 91  | 1 | 0 | -6.227117 | 3.311475  | 0.450509  |
| 92  | 6 | 0 | -4.679064 | 5.296144  | 2.834347  |
| 93  | 1 | 0 | -3.738752 | 4.364582  | 4.558645  |
| 94  | 1 | 0 | -5.474933 | 4.069404  | 4.423099  |
| 95  | 1 | 0 | -5.798334 | 5.714627  | 1.017761  |
| 96  | 1 | 0 | -6.724095 | 4.885998  | 2.273524  |
| 97  | 1 | 0 | -4.929619 | 6.232709  | 3.337877  |
| 98  | 1 | 0 | -3.716016 | 5.443141  | 2.331641  |
| 99  | 1 | 0 | 5.966374  | -0.617476 | 1.831131  |
| 100 | 1 | 0 | -5.966363 | 0.617586  | 1.831235  |

### Structure 17bb (vacuum)

Energy (Hartrees): = -2381.6179097  
 No imaginary frequencies

Standard orientation:

| Center<br>Number | Atomic<br>Number | Atomic<br>Type | Coordinates (Angstroms) |           |           |
|------------------|------------------|----------------|-------------------------|-----------|-----------|
|                  |                  |                | X                       | Y         | Z         |
| 1                | 6                | 0              | 4.748430                | 3.122367  | -0.536761 |
| 2                | 6                | 0              | 3.777371                | 3.305747  | -1.464476 |
| 3                | 6                | 0              | 2.708742                | 2.309940  | -1.556850 |
| 4                | 6                | 0              | 2.800273                | 1.085307  | -0.843792 |
| 5                | 6                | 0              | 3.961867                | 0.828284  | 0.003790  |
| 6                | 6                | 0              | 4.891915                | 1.891153  | 0.243467  |
| 7                | 6                | 0              | -3.391459               | -5.788660 | -1.483147 |
| 8                | 6                | 0              | 0.726037                | -2.011998 | -3.226999 |
| 9                | 6                | 0              | 3.779391                | 4.562213  | -2.319630 |
| 10               | 6                | 0              | 1.697648                | 0.207023  | -0.922041 |
| 11               | 6                | 0              | 0.564691                | 0.488201  | -1.683716 |
| 12               | 6                | 0              | 0.491449                | 1.698857  | -2.395824 |
| 13               | 6                | 0              | 1.553034                | 2.578341  | -2.316173 |
| 14               | 6                | 0              | 5.112818                | 4.778953  | -3.049764 |
| 15               | 6                | 0              | 3.392037                | 5.788833  | -1.482850 |
| 16               | 6                | 0              | -0.725907               | 2.012501  | -3.226846 |
| 17               | 6                | 0              | 4.290779                | -0.430533 | 0.513330  |
| 18               | 6                | 0              | -4.290928               | 0.430508  | 0.513261  |
| 19               | 6                | 0              | -0.564639               | -0.487875 | -1.683772 |
| 20               | 6                | 0              | -0.491346               | -1.698468 | -2.395973 |
| 21               | 6                | 0              | -1.552885               | -2.578007 | -2.316385 |
| 22               | 6                | 0              | -2.708591               | -2.309722 | -1.557025 |
| 23               | 6                | 0              | -2.800208               | -1.085141 | -0.843889 |
| 24               | 6                | 0              | -1.697595               | -0.206814 | -0.922050 |
| 25               | 6                | 0              | -3.778952               | -4.562062 | -2.319895 |
| 26               | 6                | 0              | -5.112318               | -4.778958 | -3.050096 |
| 27               | 6                | 0              | -3.777120               | -3.305626 | -1.464699 |
| 28               | 6                | 0              | -4.748170               | -3.122407 | -0.536947 |
| 29               | 6                | 0              | -4.891765               | -1.891260 | 0.243355  |
| 30               | 6                | 0              | -3.961833               | -0.828274 | 0.003722  |
| 31               | 1                | 0              | -3.741332               | 1.316106  | 0.230658  |

|     |   |   |           |           |           |
|-----|---|---|-----------|-----------|-----------|
| 32  | 1 | 0 | -1.462429 | -3.516649 | -2.843735 |
| 33  | 1 | 0 | 3.741039  | -1.316052 | 0.230749  |
| 34  | 1 | 0 | 1.462628  | 3.517011  | -2.843478 |
| 35  | 1 | 0 | -6.277055 | -3.604636 | 0.384095  |
| 36  | 1 | 0 | -3.358913 | -6.683591 | -2.110083 |
| 37  | 1 | 0 | 3.033466  | 4.441655  | -3.104108 |
| 38  | 8 | 0 | -1.744062 | 0.956923  | -0.209240 |
| 39  | 1 | 0 | 5.011123  | 5.612390  | -3.749617 |
| 40  | 1 | 0 | 5.389871  | 3.889267  | -3.619663 |
| 41  | 1 | 0 | 5.917534  | 5.007527  | -2.353501 |
| 42  | 1 | 0 | 3.359670  | 6.683794  | -2.109753 |
| 43  | 1 | 0 | 2.410069  | 5.653319  | -1.022988 |
| 44  | 1 | 0 | 4.125566  | 5.948311  | -0.690495 |
| 45  | 1 | 0 | 0.908745  | -1.220757 | -3.958680 |
| 46  | 1 | 0 | 0.597833  | -2.955298 | -3.757913 |
| 47  | 1 | 0 | 1.622997  | -2.084517 | -2.605481 |
| 48  | 8 | 0 | 5.710625  | 4.033669  | -0.281543 |
| 49  | 1 | 0 | 6.277353  | 3.604394  | 0.384290  |
| 50  | 8 | 0 | 5.879207  | 1.831258  | 1.013991  |
| 51  | 1 | 0 | -0.597633 | 2.955806  | -3.757735 |
| 52  | 1 | 0 | -1.622856 | 2.085075  | -2.605319 |
| 53  | 1 | 0 | -0.908685 | 1.221294  | -3.958547 |
| 54  | 8 | 0 | 1.744151  | -0.956819 | -0.209406 |
| 55  | 8 | 0 | -5.879108 | -1.831531 | 1.013825  |
| 56  | 1 | 0 | -2.409542 | -5.653015 | -1.023214 |
| 57  | 1 | 0 | -4.125014 | -5.948287 | -0.690845 |
| 58  | 8 | 0 | -5.710275 | -4.033816 | -0.281755 |
| 59  | 1 | 0 | -3.033006 | -4.441359 | -3.104332 |
| 60  | 1 | 0 | -5.010459 | -5.612338 | -3.749994 |
| 61  | 1 | 0 | -5.389483 | -3.889282 | -3.619957 |
| 62  | 1 | 0 | -5.917032 | -5.007699 | -2.353888 |
| 63  | 1 | 0 | 0.885842  | -1.394570 | -0.290304 |
| 64  | 1 | 0 | -0.885740 | 1.394662  | -0.290073 |
| 65  | 7 | 0 | 5.290563  | -0.666786 | 1.344206  |
| 66  | 6 | 0 | 7.027161  | -2.242240 | 1.354427  |
| 67  | 6 | 0 | 5.311426  | -2.202816 | 3.135410  |
| 68  | 6 | 0 | 7.361253  | -3.692839 | 1.690658  |
| 69  | 1 | 0 | 7.670924  | -1.584682 | 1.967041  |
| 70  | 6 | 0 | 5.634458  | -3.654245 | 3.483771  |
| 71  | 1 | 0 | 5.953550  | -1.541147 | 3.744024  |
| 72  | 6 | 0 | 7.080724  | -4.005036 | 3.155986  |
| 73  | 1 | 0 | 8.410982  | -3.874453 | 1.446311  |
| 74  | 1 | 0 | 6.754899  | -4.340436 | 1.047533  |
| 75  | 1 | 0 | 5.424083  | -3.813160 | 4.544419  |
| 76  | 1 | 0 | 4.956990  | -4.298840 | 2.912505  |
| 77  | 1 | 0 | 7.280324  | -5.057158 | 3.371293  |
| 78  | 1 | 0 | 7.751574  | -3.413081 | 3.789232  |
| 79  | 7 | 0 | 5.610139  | -1.983607 | 1.700146  |
| 80  | 7 | 0 | -5.290695 | 0.666640  | 1.344184  |
| 81  | 7 | 0 | -5.610463 | 1.983437  | 1.700058  |
| 82  | 6 | 0 | -7.027558 | 2.241836  | 1.354455  |
| 83  | 6 | 0 | -5.311631 | 2.202781  | 3.135280  |
| 84  | 6 | 0 | -7.361865 | 3.692387  | 1.690677  |
| 85  | 1 | 0 | -7.671164 | 1.584190  | 1.967138  |
| 86  | 6 | 0 | -5.634877 | 3.654172  | 3.483592  |
| 87  | 1 | 0 | -5.953569 | 1.541036  | 3.744006  |
| 88  | 6 | 0 | -7.081251 | 4.004679  | 3.155969  |
| 89  | 1 | 0 | -8.411644 | 3.873817  | 1.446420  |
| 90  | 1 | 0 | -6.755675 | 4.340072  | 1.047485  |
| 91  | 1 | 0 | -5.424396 | 3.813192  | 4.544202  |
| 92  | 1 | 0 | -4.957606 | 4.298858  | 2.912196  |
| 93  | 1 | 0 | -7.281031 | 5.056767  | 3.371268  |
| 94  | 1 | 0 | -7.751911 | 3.412610  | 3.789311  |
| 95  | 1 | 0 | 5.866919  | 0.125091  | 1.648438  |
| 96  | 1 | 0 | -5.866924 | -0.125311 | 1.648479  |
| 97  | 6 | 0 | -7.271817 | 1.948221  | -0.120217 |
| 98  | 1 | 0 | -6.569121 | 2.520233  | -0.731874 |
| 99  | 1 | 0 | -7.152596 | 0.889319  | -0.351919 |
| 100 | 1 | 0 | -8.287684 | 2.242692  | -0.389932 |
| 101 | 6 | 0 | -3.848576 | 1.891842  | 3.423088  |
| 102 | 1 | 0 | -3.611991 | 0.838813  | 3.271193  |
| 103 | 1 | 0 | -3.207048 | 2.487368  | 2.767953  |
| 104 | 1 | 0 | -3.617289 | 2.145751  | 4.459367  |
| 105 | 6 | 0 | 7.271315  | -1.948682 | -0.120267 |
| 106 | 1 | 0 | 6.568490  | -2.520605 | -0.731859 |
| 107 | 1 | 0 | 7.152207  | -0.889765 | -0.351970 |
| 108 | 1 | 0 | 8.287119  | -2.243288 | -0.390070 |
| 109 | 6 | 0 | 3.848453  | -1.891601 | 3.423369  |
| 110 | 1 | 0 | 3.612044  | -0.838531 | 3.271477  |
| 111 | 1 | 0 | 3.206745  | -2.487023 | 2.768315  |
| 112 | 1 | 0 | 3.617236  | -2.145448 | 4.459676  |

-----  
**Structure 17bb (CHCl<sub>3</sub>)**

Energy (Hartrees): = -2381.6654628  
 No imaginary frequencies

## Standard orientation:

| Center<br>Number | Atomic<br>Number | Atomic<br>Type | Coordinates (Angstroms) |           |           |
|------------------|------------------|----------------|-------------------------|-----------|-----------|
|                  |                  |                | X                       | Y         | Z         |
| 1                | 6                | 0              | -4.693543               | -3.204399 | -0.484548 |
| 2                | 6                | 0              | -3.701913               | -3.393188 | -1.390553 |
| 3                | 6                | 0              | -2.663106               | -2.368341 | -1.503518 |
| 4                | 6                | 0              | -2.795900               | -1.129682 | -0.821066 |
| 5                | 6                | 0              | -3.982246               | -0.876091 | -0.006939 |
| 6                | 6                | 0              | -4.888625               | -1.951397 | 0.248127  |
| 7                | 6                | 0              | 3.224500                | 5.861563  | -1.316006 |
| 8                | 6                | 0              | -0.779401               | 2.031470  | -3.141712 |
| 9                | 6                | 0              | -3.647648               | -4.680629 | -2.198329 |
| 10               | 6                | 0              | -1.702907               | -0.234339 | -0.886249 |
| 11               | 6                | 0              | -0.555206               | -0.500068 | -1.631690 |
| 12               | 6                | 0              | -0.448691               | -1.720758 | -2.326496 |
| 13               | 6                | 0              | -1.490458               | -2.623897 | -2.242769 |
| 14               | 6                | 0              | -4.959086               | -4.979352 | -2.938315 |
| 15               | 6                | 0              | -3.224503               | -5.861613 | -1.315655 |
| 16               | 6                | 0              | 0.779332                | -2.031588 | -3.141625 |
| 17               | 6                | 0              | -4.353484               | 0.398399  | 0.448318  |
| 18               | 6                | 0              | 4.353479                | -0.398371 | 0.448224  |
| 19               | 6                | 0              | 0.555161                | 0.500022  | -1.631726 |
| 20               | 6                | 0              | 0.448637                | 1.720678  | -2.326591 |
| 21               | 6                | 0              | 1.490412                | 2.623814  | -2.242937 |
| 22               | 6                | 0              | 2.663075                | 2.368289  | -1.503700 |
| 23               | 6                | 0              | 2.795879                | 1.129664  | -0.821190 |
| 24               | 6                | 0              | 1.702880                | 0.234324  | -0.886299 |
| 25               | 6                | 0              | 3.647605                | 4.680539  | -2.198646 |
| 26               | 6                | 0              | 4.959013                | 4.979228  | -2.938701 |
| 27               | 6                | 0              | 3.701893                | 3.393135  | -1.390813 |
| 28               | 6                | 0              | 4.693546                | 3.204382  | -0.484826 |
| 29               | 6                | 0              | 4.888642                | 1.951412  | 0.247901  |
| 30               | 6                | 0              | 3.982242                | 0.876103  | -0.007080 |
| 31               | 1                | 0              | 3.819510                | -1.283951 | 0.135834  |
| 32               | 1                | 0              | 1.369476                | 3.569056  | -2.752843 |
| 33               | 1                | 0              | -3.819532               | 1.283972  | 0.135880  |
| 34               | 1                | 0              | -1.369527               | -3.569166 | -2.752628 |
| 35               | 1                | 0              | 6.230200                | 3.707983  | 0.424341  |
| 36               | 1                | 0              | 3.149057                | 6.775095  | -1.912656 |
| 37               | 1                | 0              | -2.895117               | -4.562598 | -2.976301 |
| 38               | 8                | 0              | 1.783990                | -0.923824 | -0.171976 |
| 39               | 1                | 0              | -4.808945               | -5.829463 | -3.609347 |
| 40               | 1                | 0              | -5.268218               | -4.123876 | -3.544290 |
| 41               | 1                | 0              | -5.766901               | -5.223163 | -2.249790 |
| 42               | 1                | 0              | -3.149077               | -6.775169 | -1.912271 |
| 43               | 1                | 0              | -2.253206               | -5.677007 | -0.849118 |
| 44               | 1                | 0              | -3.958829               | -6.029144 | -0.524608 |
| 45               | 1                | 0              | -0.943673               | 1.270448  | -3.909441 |
| 46               | 1                | 0              | -0.676274               | 2.998905  | -3.634348 |
| 47               | 1                | 0              | -1.677702               | 2.059680  | -2.518540 |
| 48               | 8                | 0              | -5.631260               | -4.138392 | -0.212989 |
| 49               | 1                | 0              | -6.230173               | -3.707966 | 0.424680  |
| 50               | 8                | 0              | -5.894956               | -1.893578 | 0.997404  |
| 51               | 1                | 0              | 0.676190                | -2.999040 | -3.634226 |
| 52               | 1                | 0              | 1.677642                | -2.059784 | -2.518464 |
| 53               | 1                | 0              | 0.943599                | -1.270594 | -3.909382 |
| 54               | 8                | 0              | -1.784001               | 0.923843  | -0.171979 |
| 55               | 8                | 0              | 5.894983                | 1.893632  | 0.997169  |
| 56               | 1                | 0              | 2.253219                | 5.676981  | -0.849424 |
| 57               | 1                | 0              | 3.958857                | 6.029121  | -0.524993 |
| 58               | 8                | 0              | 5.631272                | 4.138385  | -0.213329 |
| 59               | 1                | 0              | 2.895043                | 4.562476  | -2.976582 |
| 60               | 1                | 0              | 4.808839                | 5.829301  | -3.609774 |
| 61               | 1                | 0              | 5.268124                | 4.123720  | -3.544642 |
| 62               | 1                | 0              | 5.766854                | 5.223081  | -2.250224 |
| 63               | 1                | 0              | -0.931841               | 1.380784  | -0.215378 |
| 64               | 1                | 0              | 0.931829                | -1.380766 | -0.215331 |
| 65               | 7                | 0              | -5.369491               | 0.646386  | 1.246329  |
| 66               | 6                | 0              | -7.122021               | 2.203762  | 1.259542  |
| 67               | 6                | 0              | -5.387366               | 2.191229  | 3.025826  |
| 68               | 6                | 0              | -7.472965               | 3.649276  | 1.599764  |
| 69               | 1                | 0              | -7.743079               | 1.534942  | 1.880827  |
| 70               | 6                | 0              | -5.728378               | 3.637534  | 3.375950  |
| 71               | 1                | 0              | -6.017963               | 1.519595  | 3.633167  |
| 72               | 6                | 0              | -7.182591               | 3.966276  | 3.061852  |
| 73               | 1                | 0              | -8.528035               | 3.813196  | 1.365968  |
| 74               | 1                | 0              | -6.883719               | 4.306926  | 0.950413  |
| 75               | 1                | 0              | -5.510856               | 3.797208  | 4.435078  |
| 76               | 1                | 0              | -5.065361               | 4.293207  | 2.799758  |
| 77               | 1                | 0              | -7.394361               | 5.016379  | 3.277039  |
| 78               | 1                | 0              | -7.838266               | 3.364516  | 3.701816  |
| 79               | 7                | 0              | -5.693774               | 1.967248  | 1.588514  |
| 80               | 7                | 0              | 5.369505                | -0.646339 | 1.246216  |
| 81               | 7                | 0              | 5.693799                | -1.967192 | 1.588423  |
| 82               | 6                | 0              | 7.122037                | -2.203705 | 1.259415  |



|     |   |   |           |           |           |
|-----|---|---|-----------|-----------|-----------|
| 83  | 6 | 0 | 5.387435  | -2.191148 | 3.025749  |
| 84  | 6 | 0 | 7.472994  | -3.649214 | 1.599645  |
| 85  | 1 | 0 | 7.743110  | -1.534877 | 1.880676  |
| 86  | 6 | 0 | 5.728462  | -3.637447 | 3.375886  |
| 87  | 1 | 0 | 6.018049  | -1.519502 | 3.633059  |
| 88  | 6 | 0 | 7.182664  | -3.966194 | 3.061746  |
| 89  | 1 | 0 | 8.528057  | -3.813135 | 1.365820  |
| 90  | 1 | 0 | 6.883730  | -4.306873 | 0.950320  |
| 91  | 1 | 0 | 5.510973  | -3.797104 | 4.435023  |
| 92  | 1 | 0 | 5.065427  | -4.293130 | 2.799725  |
| 93  | 1 | 0 | 7.394441  | -5.016295 | 3.276941  |
| 94  | 1 | 0 | 7.838359  | -3.364426 | 3.701683  |
| 95  | 1 | 0 | -5.932125 | -0.137061 | 1.591490  |
| 96  | 1 | 0 | 5.932162  | 0.137117  | 1.591323  |
| 97  | 6 | 0 | 7.380342  | -1.908235 | -0.211457 |
| 98  | 1 | 0 | 6.705365  | -2.499231 | -0.837205 |
| 99  | 1 | 0 | 7.241607  | -0.852565 | -0.450201 |
| 100 | 1 | 0 | 8.408832  | -2.176693 | -0.462330 |
| 101 | 6 | 0 | 3.919437  | -1.901457 | 3.306973  |
| 102 | 1 | 0 | 3.664231  | -0.851516 | 3.157120  |
| 103 | 1 | 0 | 3.284342  | -2.509323 | 2.655836  |
| 104 | 1 | 0 | 3.691760  | -2.155835 | 4.344499  |
| 105 | 6 | 0 | -7.380368 | 1.908276  | -0.211320 |
| 106 | 1 | 0 | -6.705407 | 2.499265  | -0.837092 |
| 107 | 1 | 0 | -7.241642 | 0.852604  | -0.450057 |
| 108 | 1 | 0 | -8.408864 | 2.176734  | -0.462167 |
| 109 | 6 | 0 | -3.919359 | 1.901538  | 3.307009  |
| 110 | 1 | 0 | -3.664161 | 0.851594  | 3.157167  |
| 111 | 1 | 0 | -3.284284 | 2.509391  | 2.655840  |
| 112 | 1 | 0 | -3.691648 | 2.155935  | 4.344522  |

### Structure 17bb (DMSO)

Energy (Hartrees): = -2381.6540251  
No imaginary frequencies

Standard orientation:

| Center<br>Number | Atomic<br>Number | Atomic<br>Type | Coordinates (Angstroms) |           |           |
|------------------|------------------|----------------|-------------------------|-----------|-----------|
|                  |                  |                | X                       | Y         | Z         |
| 1                | 6                | 0              | -4.688732               | -3.202720 | -0.483906 |
| 2                | 6                | 0              | -3.705218               | -3.387740 | -1.399768 |
| 3                | 6                | 0              | -2.664144               | -2.364654 | -1.512108 |
| 4                | 6                | 0              | -2.790194               | -1.130236 | -0.819819 |
| 5                | 6                | 0              | -3.970062               | -0.879352 | 0.004337  |
| 6                | 6                | 0              | -4.871879               | -1.955903 | 0.265032  |
| 7                | 6                | 0              | 3.215434                | 5.850241  | -1.336984 |
| 8                | 6                | 0              | -0.763714               | 2.015070  | -3.177948 |
| 9                | 6                | 0              | -3.654675               | -4.671288 | -2.213215 |
| 10               | 6                | 0              | -1.696205               | -0.235819 | -0.886504 |
| 11               | 6                | 0              | -0.556491               | -0.498545 | -1.644456 |
| 12               | 6                | 0              | -0.457545               | -1.713279 | -2.350487 |
| 13               | 6                | 0              | -1.499061               | -2.616858 | -2.265290 |
| 14               | 6                | 0              | -4.972655               | -4.974879 | -2.938078 |
| 15               | 6                | 0              | -3.215556               | -5.850308 | -1.336542 |
| 16               | 6                | 0              | 0.763612                | -2.015202 | -3.177880 |
| 17               | 6                | 0              | -4.341827               | 0.397351  | 0.457165  |
| 18               | 6                | 0              | 4.341814                | -0.397321 | 0.457052  |
| 19               | 6                | 0              | 0.556442                | 0.498487  | -1.644498 |
| 20               | 6                | 0              | 0.457474                | 1.713187  | -2.350584 |
| 21               | 6                | 0              | 1.498995                | 2.616768  | -2.265470 |
| 22               | 6                | 0              | 2.664106                | 2.364599  | -1.512318 |
| 23               | 6                | 0              | 2.790172                | 1.130216  | -0.819968 |
| 24               | 6                | 0              | 1.696181                | 0.235797  | -0.886571 |
| 25               | 6                | 0              | 3.654655                | 4.671193  | -2.213570 |
| 26               | 6                | 0              | 4.972685                | 4.974789  | -2.938338 |
| 27               | 6                | 0              | 3.705191                | 3.387685  | -1.400059 |
| 28               | 6                | 0              | 4.688741                | 3.202697  | -0.484229 |
| 29               | 6                | 0              | 4.871909                | 1.955913  | 0.264758  |
| 30               | 6                | 0              | 3.970064                | 0.879363  | 0.004160  |
| 31               | 1                | 0              | 3.811346                | -1.281691 | 0.134987  |
| 32               | 1                | 0              | 1.383154                | 3.557677  | -2.784814 |
| 33               | 1                | 0              | -3.811405               | 1.281717  | 0.135015  |
| 34               | 1                | 0              | -1.383236               | -3.557795 | -2.784589 |
| 35               | 1                | 0              | 6.212757                | 3.694258  | 0.439284  |
| 36               | 1                | 0              | 3.144578                | 6.763353  | -1.934699 |
| 37               | 1                | 0              | -2.910773               | -4.549388 | -2.998669 |
| 38               | 8                | 0              | 1.765895                | -0.913776 | -0.159055 |
| 39               | 1                | 0              | -4.824718               | -5.820042 | -3.615675 |
| 40               | 1                | 0              | -5.294935               | -4.118498 | -3.536414 |
| 41               | 1                | 0              | -5.770716               | -5.227642 | -2.241289 |
| 42               | 1                | 0              | -3.144686               | -6.763452 | -1.934209 |
| 43               | 1                | 0              | -2.237764               | -5.661810 | -0.884998 |
| 44               | 1                | 0              | -3.938240               | -6.020332 | -0.534943 |
| 45               | 1                | 0              | -0.925126               | 1.241197  | -3.933753 |

|     |   |   |           |           |           |
|-----|---|---|-----------|-----------|-----------|
| 46  | 1 | 0 | -0.654637 | 2.974517  | -3.684469 |
| 47  | 1 | 0 | -1.666028 | 2.056717  | -2.560639 |
| 48  | 8 | 0 | -5.630027 | -4.131524 | -0.208707 |
| 49  | 1 | 0 | -6.212681 | -3.694263 | 0.439730  |
| 50  | 8 | 0 | -5.866723 | -1.906363 | 1.028759  |
| 51  | 1 | 0 | 0.654527  | -2.974686 | -3.684331 |
| 52  | 1 | 0 | 1.665953  | -2.056794 | -2.560607 |
| 53  | 1 | 0 | 0.924982  | -1.241381 | -3.933748 |
| 54  | 8 | 0 | -1.765883 | 0.913786  | -0.159035 |
| 55  | 8 | 0 | 5.866763  | 1.906413  | 1.028477  |
| 56  | 1 | 0 | 2.237614  | 5.661733  | -0.885503 |
| 57  | 1 | 0 | 3.938053  | 6.020328  | -0.535339 |
| 58  | 8 | 0 | 5.630070  | 4.131498  | -0.209137 |
| 59  | 1 | 0 | 2.910817  | 4.549237  | -2.999074 |
| 60  | 1 | 0 | 4.824793  | 5.819943  | -3.615956 |
| 61  | 1 | 0 | 5.295020  | 4.118404  | -3.536640 |
| 62  | 1 | 0 | 5.770689  | 5.227565  | -2.241488 |
| 63  | 1 | 0 | -0.921189 | 1.381072  | -0.232519 |
| 64  | 1 | 0 | 0.921201  | -1.381070 | -0.232485 |
| 65  | 7 | 0 | -5.352925 | 0.650372  | 1.256806  |
| 66  | 6 | 0 | -7.101091 | 2.212323  | 1.260377  |
| 67  | 6 | 0 | -5.373618 | 2.193983  | 3.034579  |
| 68  | 6 | 0 | -7.453514 | 3.656080  | 1.605208  |
| 69  | 1 | 0 | -7.722245 | 1.539534  | 1.875819  |
| 70  | 6 | 0 | -5.716676 | 3.638553  | 3.388130  |
| 71  | 1 | 0 | -6.006823 | 1.519382  | 3.634510  |
| 72  | 6 | 0 | -7.169502 | 3.967534  | 3.069405  |
| 73  | 1 | 0 | -8.507866 | 3.818453  | 1.367540  |
| 74  | 1 | 0 | -6.862853 | 4.317872  | 0.960897  |
| 75  | 1 | 0 | -5.503833 | 3.792243  | 4.449018  |
| 76  | 1 | 0 | -5.051659 | 4.298007  | 2.818052  |
| 77  | 1 | 0 | -7.382073 | 5.017024  | 3.287010  |
| 78  | 1 | 0 | -7.826958 | 3.362450  | 3.704081  |
| 79  | 7 | 0 | -5.672822 | 1.974413  | 1.593813  |
| 80  | 7 | 0 | 5.352957  | -0.650323 | 1.256643  |
| 81  | 7 | 0 | 5.672832  | -1.974353 | 1.593717  |
| 82  | 6 | 0 | 7.101053  | -2.212348 | 1.260141  |
| 83  | 6 | 0 | 5.373780  | -2.193800 | 3.034534  |
| 84  | 6 | 0 | 7.453451  | -3.656096 | 1.605041  |
| 85  | 1 | 0 | 7.722306  | -1.539540 | 1.875462  |
| 86  | 6 | 0 | 5.716816  | -3.638358 | 3.388158  |
| 87  | 1 | 0 | 6.007084  | -1.519180 | 3.634342  |
| 88  | 6 | 0 | 7.169591  | -3.967426 | 3.069292  |
| 89  | 1 | 0 | 8.507769  | -3.818533 | 1.367266  |
| 90  | 1 | 0 | 6.862686  | -4.317910 | 0.960847  |
| 91  | 1 | 0 | 5.504088  | -3.791957 | 4.449082  |
| 92  | 1 | 0 | 5.051705  | -4.297827 | 2.818206  |
| 93  | 1 | 0 | 7.382140  | -5.016909 | 3.286953  |
| 94  | 1 | 0 | 7.827146  | -3.362323 | 3.703848  |
| 95  | 1 | 0 | -5.916908 | -0.125245 | 1.616288  |
| 96  | 1 | 0 | 5.917001  | 0.125298  | 1.616020  |
| 97  | 6 | 0 | 7.351718  | -1.926129 | -0.213633 |
| 98  | 1 | 0 | 6.677450  | -2.524018 | -0.834001 |
| 99  | 1 | 0 | 7.208377  | -0.872577 | -0.459530 |
| 100 | 1 | 0 | 8.380493  | -2.192286 | -0.465908 |
| 101 | 6 | 0 | 3.906989  | -1.904645 | 3.320955  |
| 102 | 1 | 0 | 3.650209  | -0.855352 | 3.167278  |
| 103 | 1 | 0 | 3.268743  | -2.517780 | 2.677493  |
| 104 | 1 | 0 | 3.685958  | -2.153312 | 4.361289  |
| 105 | 6 | 0 | -7.351911 | 1.925981  | -0.213347 |
| 106 | 1 | 0 | -6.677738 | 2.523849  | -0.833838 |
| 107 | 1 | 0 | -7.208557 | 0.872415  | -0.459180 |
| 108 | 1 | 0 | -8.380726 | 2.192077  | -0.465526 |
| 109 | 6 | 0 | -3.906781 | 1.904915  | 3.320852  |
| 110 | 1 | 0 | -3.649973 | 0.855622  | 3.167229  |
| 111 | 1 | 0 | -3.268638 | 2.518027  | 2.677264  |
| 112 | 1 | 0 | -3.685637 | 2.153677  | 4.361140  |

### Structure 17dd (vacuum)

Energy (Hartrees): = -2381.6090643  
 No imaginary frequencies

Standard orientation:

| Center Number | Atomic Number | Atomic Type | Coordinates (Angstroms) |           |           |
|---------------|---------------|-------------|-------------------------|-----------|-----------|
|               |               |             | X                       | Y         | Z         |
| 1             | 6             | 0           | -4.920902               | -2.924574 | -0.627049 |
| 2             | 6             | 0           | -3.925733               | -3.134406 | -1.521663 |
| 3             | 6             | 0           | -2.804458               | -2.192238 | -1.548237 |
| 4             | 6             | 0           | -2.850305               | -0.984958 | -0.798420 |
| 5             | 6             | 0           | -4.023528               | -0.694071 | 0.027571  |
| 6             | 6             | 0           | -5.031921               | -1.705351 | 0.177446  |
| 7             | 6             | 0           | 3.624665                | 5.625341  | -1.592950 |
| 8             | 6             | 0           | -0.669026               | 2.023226  | -3.155574 |

|    |   |   |           |           |           |
|----|---|---|-----------|-----------|-----------|
| 9  | 6 | 0 | -3.957455 | -4.368568 | -2.408514 |
| 10 | 6 | 0 | -1.708527 | -0.155192 | -0.850441 |
| 11 | 6 | 0 | -0.579561 | -0.470111 | -1.605765 |
| 12 | 6 | 0 | -0.545783 | -1.669544 | -2.336979 |
| 13 | 6 | 0 | -1.648369 | -2.499389 | -2.291073 |
| 14 | 6 | 0 | -5.282574 | -4.527309 | -3.168104 |
| 15 | 6 | 0 | -3.624601 | -5.625259 | -1.593282 |
| 16 | 6 | 0 | 0.669094  | -2.023050 | -3.155676 |
| 17 | 6 | 0 | -4.262075 | 0.533244  | 0.648674  |
| 18 | 6 | 0 | 4.262086  | -0.533276 | 0.648681  |
| 19 | 6 | 0 | 0.579618  | 0.470206  | -1.605735 |
| 20 | 6 | 0 | 0.545844  | 1.669678  | -2.336886 |
| 21 | 6 | 0 | 1.648431  | 2.499519  | -2.290932 |
| 22 | 6 | 0 | 2.804518  | 2.192327  | -1.548110 |
| 23 | 6 | 0 | 2.850358  | 0.985009  | -0.798355 |
| 24 | 6 | 0 | 1.708580  | 0.155247  | -0.850422 |
| 25 | 6 | 0 | 3.957520  | 4.368703  | -2.408262 |
| 26 | 6 | 0 | 5.282637  | 4.527497  | -3.167843 |
| 27 | 6 | 0 | 3.925799  | 3.134487  | -1.521486 |
| 28 | 6 | 0 | 4.920971  | 2.924596  | -0.626889 |
| 29 | 6 | 0 | 5.031986  | 1.705327  | 0.177537  |
| 30 | 6 | 0 | 4.023577  | 0.694068  | 0.027622  |
| 31 | 1 | 0 | 3.569000  | -1.349024 | 0.508795  |
| 32 | 1 | 0 | 1.594116  | 3.428777  | -2.838996 |
| 33 | 1 | 0 | -3.569026 | 1.349026  | 0.508808  |
| 34 | 1 | 0 | -1.594050 | -3.428619 | -2.839184 |
| 35 | 1 | 0 | 6.508053  | 3.347191  | 0.222108  |
| 36 | 1 | 0 | 3.611714  | 6.507876  | -2.237804 |
| 37 | 1 | 0 | -3.195339 | -4.254362 | -3.178140 |
| 38 | 8 | 0 | 1.706603  | -1.005523 | -0.128478 |
| 39 | 1 | 0 | -5.183433 | -5.333575 | -3.899431 |
| 40 | 1 | 0 | -5.532184 | -3.610214 | -3.706232 |
| 41 | 1 | 0 | -6.104577 | -4.767654 | -2.496905 |
| 42 | 1 | 0 | -3.611653 | -6.507753 | -2.238192 |
| 43 | 1 | 0 | -2.646546 | -5.532054 | -1.114824 |
| 44 | 1 | 0 | -4.376239 | -5.776295 | -0.816003 |
| 45 | 1 | 0 | -0.911759 | 1.219235  | -3.855032 |
| 46 | 1 | 0 | -0.498736 | 2.939210  | -3.721307 |
| 47 | 1 | 0 | -1.547510 | 2.168533  | -2.520188 |
| 48 | 8 | 0 | -5.935996 | -3.790103 | -0.430531 |
| 49 | 1 | 0 | -6.507977 | -3.347229 | 0.221931  |
| 50 | 8 | 0 | -6.043194 | -1.612495 | 0.906990  |
| 51 | 1 | 0 | 0.498795  | -2.938985 | -3.721485 |
| 52 | 1 | 0 | 1.547564  | -2.168428 | -2.520285 |
| 53 | 1 | 0 | 0.911857  | -1.219009 | -3.855064 |
| 54 | 8 | 0 | -1.706549 | 1.005539  | -0.128436 |
| 55 | 8 | 0 | 6.043254  | 1.612433  | 0.907085  |
| 56 | 1 | 0 | 2.646610  | 5.532105  | -1.114494 |
| 57 | 1 | 0 | 4.376304  | 5.776331  | -0.815663 |
| 58 | 8 | 0 | 5.936070  | 3.790109  | -0.430322 |
| 59 | 1 | 0 | 3.195404  | 4.254542  | -3.177893 |
| 60 | 1 | 0 | 5.183488  | 5.333803  | -3.899126 |
| 61 | 1 | 0 | 5.532255  | 3.610435  | -3.706023 |
| 62 | 1 | 0 | 6.104639  | 4.767813  | -2.496632 |
| 63 | 1 | 0 | -0.833194 | 1.411755  | -0.215693 |
| 64 | 1 | 0 | 0.833249  | -1.411734 | -0.215756 |
| 65 | 7 | 0 | -5.308757 | 0.815674  | 1.409547  |
| 66 | 6 | 0 | -4.467518 | 2.370441  | 3.001834  |
| 67 | 6 | 0 | -5.659417 | 3.132652  | 0.962053  |
| 68 | 6 | 0 | -4.813360 | 3.684598  | 3.697936  |
| 69 | 1 | 0 | -3.487595 | 2.487784  | 2.504204  |
| 70 | 6 | 0 | -6.013074 | 4.446611  | 1.655111  |
| 71 | 1 | 0 | -4.703093 | 3.276540  | 0.428004  |
| 72 | 6 | 0 | -4.972662 | 4.827269  | 2.702141  |
| 73 | 1 | 0 | -4.030977 | 3.907110  | 4.428275  |
| 74 | 1 | 0 | -5.749295 | 3.540540  | 4.249265  |
| 75 | 1 | 0 | -6.108328 | 5.226308  | 0.894823  |
| 76 | 1 | 0 | -6.993002 | 4.326874  | 2.130611  |
| 77 | 1 | 0 | -5.260779 | 5.747454  | 3.215398  |
| 78 | 1 | 0 | -4.012178 | 5.019928  | 2.210231  |
| 79 | 7 | 0 | -5.509187 | 2.081053  | 1.991028  |
| 80 | 7 | 0 | 5.308762  | -0.815780 | 1.409534  |
| 81 | 7 | 0 | 5.509127  | -2.081182 | 1.990989  |
| 82 | 6 | 0 | 4.467464  | -2.370515 | 3.001818  |
| 83 | 6 | 0 | 5.659260  | -3.132776 | 0.961996  |
| 84 | 6 | 0 | 4.813235  | -3.684705 | 3.697893  |
| 85 | 1 | 0 | 3.487520  | -2.487784 | 2.504212  |
| 86 | 6 | 0 | 6.012844  | -4.446769 | 1.655026  |
| 87 | 1 | 0 | 4.702913  | -3.276592 | 0.427968  |
| 88 | 6 | 0 | 4.972432  | -4.827371 | 2.702077  |
| 89 | 1 | 0 | 4.030855  | -3.907173 | 4.428249  |
| 90 | 1 | 0 | 5.749195  | -3.540719 | 4.249199  |
| 91 | 1 | 0 | 6.108026  | -5.226462 | 0.894725  |
| 92 | 1 | 0 | 6.992792  | -4.327107 | 2.130503  |
| 93 | 1 | 0 | 5.260500  | -5.747585 | 3.215313  |
| 94 | 1 | 0 | 4.011922  | -5.019957 | 2.210189  |
| 95 | 1 | 0 | -6.001130 | 0.090252  | 1.580825  |
| 96 | 1 | 0 | 6.001172  | -0.090396 | 1.580828  |

|     |   |   |           |           |           |
|-----|---|---|-----------|-----------|-----------|
| 97  | 6 | 0 | 4.384841  | -1.234084 | 4.013065  |
| 98  | 1 | 0 | 5.368561  | -1.068585 | 4.459568  |
| 99  | 1 | 0 | 4.048918  | -0.301098 | 3.560407  |
| 100 | 1 | 0 | 3.683027  | -1.499942 | 4.805757  |
| 101 | 6 | 0 | 6.741425  | -2.742707 | -0.036863 |
| 102 | 1 | 0 | 6.473402  | -1.858445 | -0.615589 |
| 103 | 1 | 0 | 7.674064  | -2.537409 | 0.494314  |
| 104 | 1 | 0 | 6.911067  | -3.565865 | -0.733463 |
| 105 | 6 | 0 | -4.384792 | 1.234002  | 4.013063  |
| 106 | 1 | 0 | -5.368490 | 1.068433  | 4.459591  |
| 107 | 1 | 0 | -4.048821 | 0.301044  | 3.560385  |
| 108 | 1 | 0 | -3.682974 | 1.499895  | 4.805739  |
| 109 | 6 | 0 | -6.741580 | 2.742523  | -0.036785 |
| 110 | 1 | 0 | -6.473509 | 1.858290  | -0.615533 |
| 111 | 1 | 0 | -7.674190 | 2.537148  | 0.494414  |
| 112 | 1 | 0 | -6.911299 | 3.565681  | -0.733366 |

-----

### Structure 17dd (CHCl<sub>3</sub>)

Energy (Hartrees): = -2381.6554421  
 No imaginary frequencies

Standard orientation:

| Center<br>Number | Atomic<br>Number | Atomic<br>Type | Coordinates (Angstroms) |           |           |
|------------------|------------------|----------------|-------------------------|-----------|-----------|
|                  |                  |                | X                       | Y         | Z         |
| 1                | 6                | 0              | -4.892304               | -3.009294 | -0.622074 |
| 2                | 6                | 0              | -3.862904               | -3.218083 | -1.478652 |
| 3                | 6                | 0              | -2.759203               | -2.255022 | -1.483424 |
| 4                | 6                | 0              | -2.850969               | -1.039138 | -0.751037 |
| 5                | 6                | 0              | -4.058963               | -0.755993 | 0.027628  |
| 6                | 6                | 0              | -5.054343               | -1.778934 | 0.155046  |
| 7                | 6                | 0              | 3.474540                | 5.697538  | -1.476290 |
| 8                | 6                | 0              | -0.737720               | 2.032698  | -3.022596 |
| 9                | 6                | 0              | -3.831083               | -4.475984 | -2.333351 |
| 10               | 6                | 0              | -1.716923               | -0.192754 | -0.770391 |
| 11               | 6                | 0              | -0.567578               | -0.485788 | -1.503402 |
| 12               | 6                | 0              | -0.493202               | -1.692052 | -2.224154 |
| 13               | 6                | 0              | -1.578120               | -2.545816 | -2.194650 |
| 14               | 6                | 0              | -5.125329               | -4.708560 | -3.125467 |
| 15               | 6                | 0              | -3.474472               | -5.697463 | -1.476637 |
| 16               | 6                | 0              | 0.737790                | -2.032560 | -3.022673 |
| 17               | 6                | 0              | -4.339330               | 0.483176  | 0.620837  |
| 18               | 6                | 0              | 4.339341                | -0.483205 | 0.620855  |
| 19               | 6                | 0              | 0.567628                | 0.485861  | -1.503374 |
| 20               | 6                | 0              | 0.493261                | 1.692157  | -2.224075 |
| 21               | 6                | 0              | 1.578179                | 2.545920  | -2.194521 |
| 22               | 6                | 0              | 2.759253                | 2.255094  | -1.483295 |
| 23               | 6                | 0              | 2.851012                | 1.039178  | -0.750963 |
| 24               | 6                | 0              | 1.716966                | 0.192796  | -0.770362 |
| 25               | 6                | 0              | 3.831111                | 4.476109  | -2.333090 |
| 26               | 6                | 0              | 5.125319                | 4.708735  | -3.125255 |
| 27               | 6                | 0              | 3.862952                | 3.218157  | -1.478465 |
| 28               | 6                | 0              | 4.892340                | 3.009329  | -0.621882 |
| 29               | 6                | 0              | 5.054377                | 1.778928  | 0.155175  |
| 30               | 6                | 0              | 4.058995                | 0.755995  | 0.027702  |
| 31               | 1                | 0              | 3.655665                | -1.308582 | 0.491589  |
| 32               | 1                | 0              | 1.489281                | 3.478654  | -2.732708 |
| 33               | 1                | 0              | -3.655669               | 1.308572  | 0.491614  |
| 34               | 1                | 0              | -1.489215               | -3.478527 | -2.732875 |
| 35               | 1                | 0              | 6.507009                | 3.456626  | 0.175230  |
| 36               | 1                | 0              | 3.412363                | 6.595973  | -2.096850 |
| 37               | 1                | 0              | -3.052029               | -4.357195 | -3.084414 |
| 38               | 8                | 0              | 1.757198                | -0.958836 | -0.040556 |
| 39               | 1                | 0              | -4.968883               | -5.524146 | -3.836737 |
| 40               | 1                | 0              | -5.401732               | -3.817109 | -3.694253 |
| 41               | 1                | 0              | -5.958784               | -4.973972 | -2.477328 |
| 42               | 1                | 0              | -3.412318               | -6.595861 | -2.097254 |
| 43               | 1                | 0              | -2.511995               | -5.559781 | -0.976739 |
| 44               | 1                | 0              | -4.237479               | -5.861342 | -0.711849 |
| 45               | 1                | 0              | -0.940091               | 1.265631  | -3.775246 |
| 46               | 1                | 0              | -0.611039               | 2.988643  | -3.531722 |
| 47               | 1                | 0              | -1.623869               | 2.099671  | -2.385178 |
| 48               | 8                | 0              | -5.895949               | -3.894842 | -0.445605 |
| 49               | 1                | 0              | -6.506998               | -3.456618 | 0.174970  |
| 50               | 8                | 0              | -6.096674               | -1.693122 | 0.846354  |
| 51               | 1                | 0              | 0.611107                | -2.988474 | -3.531857 |
| 52               | 1                | 0              | 1.623925                | -2.099581 | -2.385241 |
| 53               | 1                | 0              | 0.940184                | -1.265450 | -3.775272 |
| 54               | 8                | 0              | -1.757160               | 0.958849  | -0.040539 |
| 55               | 8                | 0              | 6.096702                | 1.693087  | 0.846488  |
| 56               | 1                | 0              | 2.512086                | 5.559831  | -0.976354 |
| 57               | 1                | 0              | 4.237584                | 5.861367  | -0.711527 |
| 58               | 8                | 0              | 5.895968                | 3.894880  | -0.445332 |
| 59               | 1                | 0              | 3.052025                | 4.357362  | -3.084128 |

|     |   |   |           |           |           |
|-----|---|---|-----------|-----------|-----------|
| 60  | 1 | 0 | 4.968824  | 5.524344  | -3.836487 |
| 61  | 1 | 0 | 5.401710  | 3.817310  | -3.694089 |
| 62  | 1 | 0 | 5.958800  | 4.974135  | -2.477147 |
| 63  | 1 | 0 | -0.889690 | 1.386924  | -0.080124 |
| 64  | 1 | 0 | 0.889728  | -1.386910 | -0.080165 |
| 65  | 7 | 0 | -5.413033 | 0.760691  | 1.336091  |
| 66  | 6 | 0 | -4.636707 | 2.338633  | 2.938448  |
| 67  | 6 | 0 | -5.789199 | 3.069187  | 0.857752  |
| 68  | 6 | 0 | -5.009500 | 3.658181  | 3.609319  |
| 69  | 1 | 0 | -3.648606 | 2.456288  | 2.460468  |
| 70  | 6 | 0 | -6.168527 | 4.386633  | 1.530029  |
| 71  | 1 | 0 | -4.823329 | 3.212701  | 0.344136  |
| 72  | 6 | 0 | -5.154751 | 4.786564  | 2.595576  |
| 73  | 1 | 0 | -4.243616 | 3.894819  | 4.352529  |
| 74  | 1 | 0 | -5.956017 | 3.515553  | 4.143341  |
| 75  | 1 | 0 | -6.251114 | 5.155944  | 0.757794  |
| 76  | 1 | 0 | -7.158663 | 4.266771  | 1.984822  |
| 77  | 1 | 0 | -5.463040 | 5.709954  | 3.091458  |
| 78  | 1 | 0 | -4.184764 | 4.980298  | 2.123107  |
| 79  | 7 | 0 | -5.652825 | 2.028257  | 1.903701  |
| 80  | 7 | 0 | 5.413031  | -0.760776 | 1.336109  |
| 81  | 7 | 0 | 5.652780  | -2.028367 | 1.903680  |
| 82  | 6 | 0 | 4.636637  | -2.338744 | 2.938403  |
| 83  | 6 | 0 | 5.789141  | -3.069272 | 0.857704  |
| 84  | 6 | 0 | 5.009384  | -3.658320 | 3.609244  |
| 85  | 1 | 0 | 3.648542  | -2.456360 | 2.460401  |
| 86  | 6 | 0 | 6.168421  | -4.386747 | 1.529951  |
| 87  | 1 | 0 | 4.823274  | -3.212747 | 0.344070  |
| 88  | 6 | 0 | 5.154619  | -4.786678 | 2.595473  |
| 89  | 1 | 0 | 4.243481  | -3.894957 | 4.352436  |
| 90  | 1 | 0 | 5.955896  | -3.515732 | 4.143286  |
| 91  | 1 | 0 | 6.250998  | -5.156040 | 0.757698  |
| 92  | 1 | 0 | 7.158554  | -4.266925 | 1.984763  |
| 93  | 1 | 0 | 5.462877  | -5.710091 | 3.091334  |
| 94  | 1 | 0 | 4.184633  | -4.980373 | 2.122985  |
| 95  | 1 | 0 | -6.102733 | 0.030748  | 1.496930  |
| 96  | 1 | 0 | 6.102739  | -0.030852 | 1.496997  |
| 97  | 6 | 0 | 4.572156  | -1.215045 | 3.964004  |
| 98  | 1 | 0 | 5.565511  | -1.039345 | 4.386289  |
| 99  | 1 | 0 | 4.208769  | -0.279816 | 3.535725  |
| 100 | 1 | 0 | 3.897268  | -1.498331 | 4.774516  |
| 101 | 6 | 0 | 6.847044  | -2.657855 | -0.156949 |
| 102 | 1 | 0 | 6.559108  | -1.771751 | -0.724948 |
| 103 | 1 | 0 | 7.790793  | -2.448274 | 0.353941  |
| 104 | 1 | 0 | 7.010656  | -3.472885 | -0.865174 |
| 105 | 6 | 0 | -4.572215 | 1.214909  | 3.964022  |
| 106 | 1 | 0 | -5.565572 | 1.039177  | 4.386288  |
| 107 | 1 | 0 | -4.208801 | 0.279700  | 3.535724  |
| 108 | 1 | 0 | -3.897344 | 1.498189  | 4.774551  |
| 109 | 6 | 0 | -6.847075 | 2.657766  | -0.156928 |
| 110 | 1 | 0 | -6.559104 | 1.771687  | -0.724947 |
| 111 | 1 | 0 | -7.790825 | 2.448140  | 0.353944  |
| 112 | 1 | 0 | -7.010704 | 3.472811  | -0.865131 |

### Structure 17dd (DMSO)

Energy (Hartrees): = -2381.6441442  
No imaginary frequencies

Standard orientation:

| Center Number | Atomic Number | Atomic Type | Coordinates (Angstroms) |           |           |
|---------------|---------------|-------------|-------------------------|-----------|-----------|
|               |               |             | X                       | Y         | Z         |
| 1             | 6             | 0           | -4.892971               | -2.983694 | -0.617048 |
| 2             | 6             | 0           | -3.883394               | -3.189898 | -1.497983 |
| 3             | 6             | 0           | -2.776452               | -2.230995 | -1.518013 |
| 4             | 6             | 0           | -2.848109               | -1.022050 | -0.771293 |
| 5             | 6             | 0           | -4.039369               | -0.738817 | 0.032497  |
| 6             | 6             | 0           | -5.032536               | -1.759680 | 0.175383  |
| 7             | 6             | 0           | 3.495699                | 5.666793  | -1.523595 |
| 8             | 6             | 0           | -0.701597               | 2.017008  | -3.101899 |
| 9             | 6             | 0           | -3.872106               | -4.440084 | -2.363595 |
| 10            | 6             | 0           | -1.708627               | -0.182560 | -0.800921 |
| 11            | 6             | 0           | -0.573188               | -0.479284 | -1.553001 |
| 12            | 6             | 0           | -0.519167               | -1.677410 | -2.288907 |
| 13            | 6             | 0           | -1.609457               | -2.524031 | -2.252755 |
| 14            | 6             | 0           | -5.185375               | -4.665957 | -3.124376 |
| 15            | 6             | 0           | -3.495912               | -5.666792 | -1.524106 |
| 16            | 6             | 0           | 0.701568                | -2.017047 | -3.101922 |
| 17            | 6             | 0           | -4.308338               | 0.503666  | 0.629353  |
| 18            | 6             | 0           | 4.308301                | -0.503723 | 0.629536  |
| 19            | 6             | 0           | 0.573088                | 0.479210  | -1.552955 |
| 20            | 6             | 0           | 0.519092                | 1.677362  | -2.288818 |
| 21            | 6             | 0           | 1.609361                | 2.524000  | -2.252559 |
| 22            | 6             | 0           | 2.776311                | 2.230957  | -1.517751 |

|     |   |   |           |           |           |
|-----|---|---|-----------|-----------|-----------|
| 23  | 6 | 0 | 2.847962  | 1.021976  | -0.771085 |
| 24  | 6 | 0 | 1.708485  | 0.182469  | -0.800817 |
| 25  | 6 | 0 | 3.871859  | 4.440134  | -2.363173 |
| 26  | 6 | 0 | 5.185050  | 4.666085  | -3.124068 |
| 27  | 6 | 0 | 3.883210  | 3.189903  | -1.497623 |
| 28  | 6 | 0 | 4.892735  | 2.983717  | -0.616621 |
| 29  | 6 | 0 | 5.032298  | 1.759675  | 0.175765  |
| 30  | 6 | 0 | 4.039205  | 0.738765  | 0.032752  |
| 31  | 1 | 0 | 3.630501  | -1.331271 | 0.482802  |
| 32  | 1 | 0 | 1.535451  | 3.451316  | -2.802586 |
| 33  | 1 | 0 | -3.630413 | 1.331129  | 0.482692  |
| 34  | 1 | 0 | -1.535525 | -3.451322 | -2.802818 |
| 35  | 1 | 0 | 6.481716  | 3.419429  | 0.221700  |
| 36  | 1 | 0 | 3.446092  | 6.560466  | -2.151991 |
| 37  | 1 | 0 | -3.110498 | -4.317026 | -3.131547 |
| 38  | 8 | 0 | 1.727557  | -0.958790 | -0.057273 |
| 39  | 1 | 0 | -5.047172 | -5.475475 | -3.846200 |
| 40  | 1 | 0 | -5.475992 | -3.769787 | -3.679091 |
| 41  | 1 | 0 | -6.002505 | -4.936370 | -2.457459 |
| 42  | 1 | 0 | -3.446383 | -6.560436 | -2.152548 |
| 43  | 1 | 0 | -2.521890 | -5.531928 | -1.045936 |
| 44  | 1 | 0 | -4.241837 | -5.836848 | -0.743546 |
| 45  | 1 | 0 | -0.920282 | 1.226567  | -3.825461 |
| 46  | 1 | 0 | -0.553243 | 2.951573  | -3.643531 |
| 47  | 1 | 0 | -1.586038 | 2.128302  | -2.467377 |
| 48  | 8 | 0 | -5.897905 | -3.863748 | -0.420962 |
| 49  | 1 | 0 | -6.482074 | -3.419351 | 0.221074  |
| 50  | 8 | 0 | -6.058663 | -1.680963 | 0.892638  |
| 51  | 1 | 0 | 0.553214  | -2.951564 | -3.643635 |
| 52  | 1 | 0 | 1.585955  | -2.128431 | -2.467338 |
| 53  | 1 | 0 | 0.920346  | -1.226559 | -3.825405 |
| 54  | 8 | 0 | -1.727774 | 0.958677  | -0.057344 |
| 55  | 8 | 0 | 6.058411  | 1.680924  | 0.893035  |
| 56  | 1 | 0 | 2.521723  | 5.531882  | -1.045345 |
| 57  | 1 | 0 | 4.241690  | 5.836830  | -0.743094 |
| 58  | 8 | 0 | 5.897588  | 3.863826  | -0.420374 |
| 59  | 1 | 0 | 3.110191  | 4.317090  | -3.131071 |
| 60  | 1 | 0 | 5.046724  | 5.475579  | -3.845895 |
| 61  | 1 | 0 | 5.475679  | 3.769925  | -3.678795 |
| 62  | 1 | 0 | 6.002220  | 4.936567  | -2.457232 |
| 63  | 1 | 0 | -0.866219 | 1.394515  | -0.130781 |
| 64  | 1 | 0 | 0.866000  | -1.394610 | -0.130788 |
| 65  | 7 | 0 | -5.366463 | 0.778951  | 1.365181  |
| 66  | 6 | 0 | -4.571938 | 2.354456  | 2.961334  |
| 67  | 6 | 0 | -5.748864 | 3.090209  | 0.895279  |
| 68  | 6 | 0 | -4.940270 | 3.670283  | 3.640939  |
| 69  | 1 | 0 | -3.591386 | 2.476080  | 2.470713  |
| 70  | 6 | 0 | -6.123579 | 4.403754  | 1.576892  |
| 71  | 1 | 0 | -4.788788 | 3.236229  | 0.373797  |
| 72  | 6 | 0 | -5.098753 | 4.801422  | 2.632560  |
| 73  | 1 | 0 | -4.165703 | 3.904977  | 4.375683  |
| 74  | 1 | 0 | -5.880428 | 3.524814  | 4.185948  |
| 75  | 1 | 0 | -6.215199 | 5.175031  | 0.807756  |
| 76  | 1 | 0 | -7.108836 | 4.281589  | 2.042312  |
| 77  | 1 | 0 | -5.403371 | 5.722572  | 3.135118  |
| 78  | 1 | 0 | -4.134504 | 4.997147  | 2.149662  |
| 79  | 7 | 0 | -5.601915 | 2.045755  | 1.937963  |
| 80  | 7 | 0 | 5.366455  | -0.778888 | 1.365368  |
| 81  | 7 | 0 | 5.602109  | -2.045688 | 1.938076  |
| 82  | 6 | 0 | 4.572183  | -2.354629 | 2.961426  |
| 83  | 6 | 0 | 5.749242  | -3.090058 | 0.895333  |
| 84  | 6 | 0 | 4.940759  | -3.670422 | 3.640965  |
| 85  | 1 | 0 | 3.591658  | -2.476414 | 2.470792  |
| 86  | 6 | 0 | 6.124200  | -4.403569 | 1.576877  |
| 87  | 1 | 0 | 4.789192  | -3.236226 | 0.373847  |
| 88  | 6 | 0 | 5.099450  | -4.801480 | 2.632527  |
| 89  | 1 | 0 | 4.166236  | -3.905296 | 4.375697  |
| 90  | 1 | 0 | 5.880890  | -3.524806 | 4.185981  |
| 91  | 1 | 0 | 6.215959  | -5.174789 | 0.807700  |
| 92  | 1 | 0 | 7.109436  | -4.281246 | 2.042300  |
| 93  | 1 | 0 | 5.404240  | -5.722600 | 3.135037  |
| 94  | 1 | 0 | 4.135236  | -4.997358 | 2.149623  |
| 95  | 1 | 0 | -6.049187 | 0.046738  | 1.544419  |
| 96  | 1 | 0 | 6.049059  | -0.046578 | 1.544666  |
| 97  | 6 | 0 | 4.494319  | -1.227750 | 3.981933  |
| 98  | 1 | 0 | 5.482196  | -1.049043 | 4.416399  |
| 99  | 1 | 0 | 4.133803  | -0.294744 | 3.545672  |
| 100 | 1 | 0 | 3.809781  | -1.510137 | 4.784647  |
| 101 | 6 | 0 | 6.817417  | -2.680326 | -0.108756 |
| 102 | 1 | 0 | 6.529037  | -1.803190 | -0.690859 |
| 103 | 1 | 0 | 7.753477  | -2.457458 | 0.411274  |
| 104 | 1 | 0 | 6.996689  | -3.501852 | -0.805646 |
| 105 | 6 | 0 | -4.494292 | 1.227513  | 3.981786  |
| 106 | 1 | 0 | -5.482203 | 1.048976  | 4.416242  |
| 107 | 1 | 0 | -4.133956 | 0.294459  | 3.545480  |
| 108 | 1 | 0 | -3.809699 | 1.509729  | 4.784514  |
| 109 | 6 | 0 | -6.817119 | 2.680728  | -0.108828 |
| 110 | 1 | 0 | -6.528901 | 1.803577  | -0.690988 |

|     |   |   |           |          |           |
|-----|---|---|-----------|----------|-----------|
| 111 | 1 | 0 | -7.753214 | 2.457992 | 0.411197  |
| 112 | 1 | 0 | -6.996253 | 3.502329 | -0.805665 |

### Structure 19a (vacuum)

Energy (Hartrees): = -1112.7767906  
No imaginary frequencies

Standard orientation:

| Center<br>Number | Atomic<br>Number | Atomic<br>Type | Coordinates (Angstroms) |           |           |
|------------------|------------------|----------------|-------------------------|-----------|-----------|
|                  |                  |                | X                       | Y         | Z         |
| 1                | 6                | 0              | -1.609811               | -1.850183 | -0.134112 |
| 2                | 6                | 0              | -2.663656               | -1.001065 | 0.078743  |
| 3                | 6                | 0              | -2.400284               | 0.414327  | 0.062387  |
| 4                | 6                | 0              | -1.060943               | 0.902035  | -0.073549 |
| 5                | 6                | 0              | 0.034234                | -0.031225 | -0.179454 |
| 6                | 6                | 0              | -0.275340               | -1.377548 | -0.248518 |
| 7                | 6                | 0              | -4.053307               | -1.585726 | 0.278209  |
| 8                | 6                | 0              | -0.903089               | 2.318423  | -0.159659 |
| 9                | 6                | 0              | -1.966922               | 3.178821  | -0.060964 |
| 10               | 6                | 0              | -3.278432               | 2.699006  | 0.099979  |
| 11               | 6                | 0              | -3.471787               | 1.344614  | 0.152711  |
| 12               | 6                | 0              | -4.114349               | -2.552715 | 1.470211  |
| 13               | 6                | 0              | -4.571996               | -2.240275 | -1.009408 |
| 14               | 6                | 0              | -4.422256               | 3.673130  | 0.190352  |
| 15               | 6                | 0              | 1.451476                | 0.357785  | -0.127264 |
| 16               | 1                | 0              | 1.682204                | 1.379352  | 0.128233  |
| 17               | 1                | 0              | -4.486197               | 0.986493  | 0.240693  |
| 18               | 1                | 0              | -4.736388               | -0.775312 | 0.522357  |
| 19               | 1                | 0              | -5.151698               | -2.848686 | 1.647301  |
| 20               | 1                | 0              | -3.738652               | -2.071855 | 2.376124  |
| 21               | 1                | 0              | -3.526388               | -3.450163 | 1.285147  |
| 22               | 1                | 0              | -5.590974               | -2.607419 | -0.861164 |
| 23               | 1                | 0              | -4.581865               | -1.520937 | -1.831510 |
| 24               | 1                | 0              | -3.940655               | -3.082761 | -1.294171 |
| 25               | 8                | 0              | -1.784334               | -3.194472 | -0.210922 |
| 26               | 1                | 0              | -0.908877               | -3.583482 | -0.339238 |
| 27               | 8                | 0              | 0.634522                | -2.358851 | -0.392214 |
| 28               | 1                | 0              | 1.525148                | -1.919014 | -0.473104 |
| 29               | 1                | 0              | -5.375765               | 3.152794  | 0.283177  |
| 30               | 1                | 0              | -4.465100               | 4.307429  | -0.698973 |
| 31               | 1                | 0              | -4.307744               | 4.329560  | 1.057068  |
| 32               | 8                | 0              | 0.351429                | 2.829383  | -0.371070 |
| 33               | 1                | 0              | 0.271437                | 3.778606  | -0.495489 |
| 34               | 7                | 0              | 2.370299                | -0.511689 | -0.357030 |
| 35               | 6                | 0              | 4.088873                | 1.084706  | 0.238009  |
| 36               | 6                | 0              | 4.465417                | -1.339607 | 0.164115  |
| 37               | 6                | 0              | 5.587143                | 1.324377  | 0.069592  |
| 38               | 1                | 0              | 3.803458                | 1.121773  | 1.304958  |
| 39               | 1                | 0              | 3.545156                | 1.877550  | -0.279379 |
| 40               | 6                | 0              | 5.959831                | -1.135875 | -0.037455 |
| 41               | 1                | 0              | 4.249105                | -1.488971 | 1.235561  |
| 42               | 1                | 0              | 4.113403                | -2.221411 | -0.373225 |
| 43               | 6                | 0              | 6.409296                | 0.164529  | 0.624564  |
| 44               | 1                | 0              | 5.848496                | 2.263233  | 0.563448  |
| 45               | 1                | 0              | 5.800807                | 1.443028  | -0.997079 |
| 46               | 1                | 0              | 6.495529                | -1.993594 | 0.375963  |
| 47               | 1                | 0              | 6.172095                | -1.095937 | -1.110376 |
| 48               | 1                | 0              | 7.474925                | 0.337477  | 0.458956  |
| 49               | 1                | 0              | 6.256755                | 0.092456  | 1.707923  |
| 50               | 7                | 0              | 3.704573                | -0.195928 | -0.342865 |
| 51               | 1                | 0              | -1.789839               | 4.249441  | -0.131221 |

### Structure 19a (CHCl<sub>3</sub>)

Energy (Hartrees): = -1112.8034809  
No imaginary frequencies

Standard orientation:

| Center<br>Number | Atomic<br>Number | Atomic<br>Type | Coordinates (Angstroms) |           |           |
|------------------|------------------|----------------|-------------------------|-----------|-----------|
|                  |                  |                | X                       | Y         | Z         |
| 1                | 6                | 0              | -1.595607               | -1.850791 | -0.128090 |
| 2                | 6                | 0              | -2.657935               | -1.007566 | 0.074984  |
| 3                | 6                | 0              | -2.403783               | 0.410759  | 0.060341  |
| 4                | 6                | 0              | -1.068659               | 0.905691  | -0.097788 |
| 5                | 6                | 0              | 0.034078                | -0.019520 | -0.200233 |
| 6                | 6                | 0              | -0.264360               | -1.369967 | -0.248385 |
| 7                | 6                | 0              | -4.046786               | -1.601134 | 0.260860  |
| 8                | 6                | 0              | -0.917522               | 2.323360  | -0.209563 |
| 9                | 6                | 0              | -1.982391               | 3.181043  | -0.088088 |
| 10               | 6                | 0              | -3.285922               | 2.694851  | 0.122918  |

|    |   |   |           |           |           |
|----|---|---|-----------|-----------|-----------|
| 11 | 6 | 0 | -3.475977 | 1.338699  | 0.184523  |
| 12 | 6 | 0 | -4.125572 | -2.539883 | 1.473296  |
| 13 | 6 | 0 | -4.537257 | -2.289993 | -1.019797 |
| 14 | 6 | 0 | -4.427000 | 3.666733  | 0.256522  |
| 15 | 6 | 0 | 1.449782  | 0.380957  | -0.140059 |
| 16 | 1 | 0 | 1.678058  | 1.399984  | 0.129141  |
| 17 | 1 | 0 | -4.486247 | 0.980947  | 0.314757  |
| 18 | 1 | 0 | -4.744331 | -0.792929 | 0.466087  |
| 19 | 1 | 0 | -5.163786 | -2.843544 | 1.634638  |
| 20 | 1 | 0 | -3.778469 | -2.036280 | 2.379151  |
| 21 | 1 | 0 | -3.525784 | -3.437671 | 1.326729  |
| 22 | 1 | 0 | -5.559763 | -2.652834 | -0.883052 |
| 23 | 1 | 0 | -4.534271 | -1.592085 | -1.860914 |
| 24 | 1 | 0 | -3.904334 | -3.140710 | -1.276254 |
| 25 | 8 | 0 | -1.762957 | -3.196968 | -0.187867 |
| 26 | 1 | 0 | -0.889374 | -3.593248 | -0.317623 |
| 27 | 8 | 0 | 0.655865  | -2.343926 | -0.376524 |
| 28 | 1 | 0 | 1.543913  | -1.892773 | -0.468105 |
| 29 | 1 | 0 | -5.375426 | 3.146417  | 0.395913  |
| 30 | 1 | 0 | -4.509805 | 4.295297  | -0.634509 |
| 31 | 1 | 0 | -4.272754 | 4.331449  | 1.111031  |
| 32 | 8 | 0 | 0.325470  | 2.825115  | -0.468485 |
| 33 | 1 | 0 | 0.256320  | 3.779561  | -0.589523 |
| 34 | 7 | 0 | 2.370335  | -0.485682 | -0.375256 |
| 35 | 6 | 0 | 4.088731  | 1.090341  | 0.266646  |
| 36 | 6 | 0 | 4.457002  | -1.339433 | 0.138924  |
| 37 | 6 | 0 | 5.589807  | 1.324718  | 0.122789  |
| 38 | 1 | 0 | 3.789243  | 1.100748  | 1.329160  |
| 39 | 1 | 0 | 3.556379  | 1.897707  | -0.239506 |
| 40 | 6 | 0 | 5.953686  | -1.134523 | -0.038910 |
| 41 | 1 | 0 | 4.226159  | -1.511461 | 1.202881  |
| 42 | 1 | 0 | 4.110115  | -2.206830 | -0.425225 |
| 43 | 6 | 0 | 6.399696  | 0.147924  | 0.659112  |
| 44 | 1 | 0 | 5.845961  | 2.249466  | 0.645176  |
| 45 | 1 | 0 | 5.819420  | 1.471268  | -0.937514 |
| 46 | 1 | 0 | 6.478310  | -2.004842 | 0.362464  |
| 47 | 1 | 0 | 6.181934  | -1.071486 | -1.108051 |
| 48 | 1 | 0 | 7.467775  | 0.320155  | 0.507747  |
| 49 | 1 | 0 | 6.234169  | 0.050397  | 1.738585  |
| 50 | 7 | 0 | 3.703506  | -0.177873 | -0.347835 |
| 51 | 1 | 0 | -1.811391 | 4.250818  | -0.178549 |

-----

### Structure 19a (DMSO)

Energy (Hartrees): = -1112.7985009  
 No imaginary frequencies

Standard orientation:

| Center<br>Number | Atomic<br>Number | Atomic<br>Type | Coordinates (Angstroms) |           |           |
|------------------|------------------|----------------|-------------------------|-----------|-----------|
|                  |                  |                | X                       | Y         | Z         |
| 1                | 6                | 0              | -1.578073               | -1.851104 | -0.135858 |
| 2                | 6                | 0              | -2.646959               | -1.019998 | 0.082665  |
| 3                | 6                | 0              | -2.408075               | 0.401344  | 0.061652  |
| 4                | 6                | 0              | -1.076956               | 0.911012  | -0.086218 |
| 5                | 6                | 0              | 0.035915                | -0.002737 | -0.191966 |
| 6                | 6                | 0              | -0.251129               | -1.355786 | -0.256532 |
| 7                | 6                | 0              | -4.028268               | -1.623349 | 0.290231  |
| 8                | 6                | 0              | -0.939311               | 2.331108  | -0.186745 |
| 9                | 6                | 0              | -2.015306               | 3.177254  | -0.077453 |
| 10               | 6                | 0              | -3.317245               | 2.675219  | 0.106145  |
| 11               | 6                | 0              | -3.493967               | 1.316235  | 0.165023  |
| 12               | 6                | 0              | -4.073622               | -2.594442 | 1.477895  |
| 13               | 6                | 0              | -4.549525               | -2.279502 | -0.994260 |
| 14               | 6                | 0              | -4.472022               | 3.633308  | 0.211952  |
| 15               | 6                | 0              | 1.450204                | 0.406916  | -0.128228 |
| 16               | 1                | 0              | 1.677576                | 1.422579  | 0.155487  |
| 17               | 1                | 0              | -4.503804               | 0.947783  | 0.269152  |
| 18               | 1                | 0              | -4.720436               | -0.823309 | 0.540384  |
| 19               | 1                | 0              | -5.108381               | -2.897210 | 1.660819  |
| 20               | 1                | 0              | -3.699641               | -2.116181 | 2.387005  |
| 21               | 1                | 0              | -3.482104               | -3.490246 | 1.291237  |
| 22               | 1                | 0              | -5.563909               | -2.657218 | -0.838889 |
| 23               | 1                | 0              | -4.578915               | -1.557803 | -1.814907 |
| 24               | 1                | 0              | -3.915514               | -3.116523 | -1.292343 |
| 25               | 8                | 0              | -1.730442               | -3.197962 | -0.210704 |
| 26               | 1                | 0              | -0.849899               | -3.579326 | -0.336281 |
| 27               | 8                | 0              | 0.676660                | -2.318562 | -0.399330 |
| 28               | 1                | 0              | 1.561793                | -1.853362 | -0.480015 |
| 29               | 1                | 0              | -5.416540               | 3.101835  | 0.334837  |
| 30               | 1                | 0              | -4.542172               | 4.257479  | -0.683195 |
| 31               | 1                | 0              | -4.341588               | 4.304969  | 1.064921  |
| 32               | 8                | 0              | 0.300530                | 2.845155  | -0.423409 |
| 33               | 1                | 0              | 0.229170                | 3.805340  | -0.496779 |
| 34               | 7                | 0              | 2.371076                | -0.455894 | -0.378793 |



|    |   |   |           |           |           |
|----|---|---|-----------|-----------|-----------|
| 35 | 6 | 0 | 4.097637  | 1.099052  | 0.289174  |
| 36 | 6 | 0 | 4.454917  | -1.332239 | 0.106736  |
| 37 | 6 | 0 | 5.599425  | 1.327389  | 0.145515  |
| 38 | 1 | 0 | 3.801552  | 1.086149  | 1.351943  |
| 39 | 1 | 0 | 3.569186  | 1.920010  | -0.198402 |
| 40 | 6 | 0 | 5.951094  | -1.128999 | -0.073130 |
| 41 | 1 | 0 | 4.228340  | -1.523538 | 1.167766  |
| 42 | 1 | 0 | 4.101609  | -2.185871 | -0.474539 |
| 43 | 6 | 0 | 6.404551  | 0.134856  | 0.652535  |
| 44 | 1 | 0 | 5.861481  | 2.238797  | 0.687828  |
| 45 | 1 | 0 | 5.827421  | 1.497438  | -0.911802 |
| 46 | 1 | 0 | 6.472827  | -2.010918 | 0.305892  |
| 47 | 1 | 0 | 6.175992  | -1.042679 | -1.141516 |
| 48 | 1 | 0 | 7.473062  | 0.305547  | 0.502189  |
| 49 | 1 | 0 | 6.239848  | 0.013021  | 1.729542  |
| 50 | 7 | 0 | 3.703811  | -0.155329 | -0.350775 |
| 51 | 1 | 0 | -1.854860 | 4.249524  | -0.160605 |

-----

### Structure 19b (vacuum)

Energy (Hartrees): = -1112.7743696  
 Imaginary frequency -20.42

Standard orientation:

| Center<br>Number | Atomic<br>Number | Atomic<br>Type | Coordinates (Angstroms) |           |           |
|------------------|------------------|----------------|-------------------------|-----------|-----------|
|                  |                  |                | X                       | Y         | Z         |
| 1                | 6                | 0              | -1.554545               | -1.837717 | -0.164170 |
| 2                | 6                | 0              | -2.644354               | -1.033968 | 0.035411  |
| 3                | 6                | 0              | -2.438497               | 0.393655  | 0.064292  |
| 4                | 6                | 0              | -1.117621               | 0.935046  | 0.000222  |
| 5                | 6                | 0              | 0.016448                | 0.045967  | -0.088404 |
| 6                | 6                | 0              | -0.232710               | -1.311988 | -0.214481 |
| 7                | 6                | 0              | -4.016850               | -1.673010 | 0.174736  |
| 8                | 6                | 0              | -1.005714               | 2.355244  | -0.035025 |
| 9                | 6                | 0              | -2.105228               | 3.173867  | 0.036286  |
| 10               | 6                | 0              | -3.402890               | 2.641404  | 0.118956  |
| 11               | 6                | 0              | -3.547926               | 1.278581  | 0.126610  |
| 12               | 6                | 0              | -4.075201               | -2.691013 | 1.323628  |
| 13               | 6                | 0              | -4.477734               | -2.289170 | -1.153221 |
| 14               | 6                | 0              | -4.586514               | 3.569415  | 0.178376  |
| 15               | 6                | 0              | 1.415011                | 0.461993  | 0.036928  |
| 16               | 1                | 0              | 1.661813                | 1.479433  | 0.313669  |
| 17               | 1                | 0              | -4.551336               | 0.881644  | 0.154062  |
| 18               | 1                | 0              | -4.732113               | -0.896058 | 0.435402  |
| 19               | 1                | 0              | -5.107835               | -3.020380 | 1.464530  |
| 20               | 1                | 0              | -3.732089               | -2.239186 | 2.257022  |
| 21               | 1                | 0              | -3.459908               | -3.564578 | 1.114970  |
| 22               | 1                | 0              | -5.483158               | -2.704462 | -1.045834 |
| 23               | 1                | 0              | -4.499873               | -1.534764 | -1.943135 |
| 24               | 1                | 0              | -3.804589               | -3.091123 | -1.458761 |
| 25               | 8                | 0              | -1.674931               | -3.183539 | -0.288883 |
| 26               | 1                | 0              | -0.780521               | -3.537929 | -0.383291 |
| 27               | 8                | 0              | 0.715231                | -2.246350 | -0.350392 |
| 28               | 1                | 0              | 1.607044                | -1.773003 | -0.341479 |
| 29               | 1                | 0              | -5.522598               | 3.011204  | 0.201753  |
| 30               | 1                | 0              | -4.606289               | 4.231854  | -0.690831 |
| 31               | 1                | 0              | -4.543970               | 4.198811  | 1.071187  |
| 32               | 8                | 0              | 0.239734                | 2.903122  | -0.168411 |
| 33               | 1                | 0              | 0.149689                | 3.857501  | -0.231754 |
| 34               | 7                | 0              | 2.368848                | -0.377582 | -0.138769 |
| 35               | 6                | 0              | 4.317172                | -0.634354 | 1.121415  |
| 36               | 6                | 0              | 4.411567                | 0.069245  | -1.183083 |
| 37               | 6                | 0              | 5.720500                | -0.102900 | 1.389805  |
| 38               | 1                | 0              | 4.363405                | -1.692799 | 0.811430  |
| 39               | 1                | 0              | 3.699575                | -0.575552 | 2.019536  |
| 40               | 6                | 0              | 5.819183                | 0.625559  | -1.001994 |
| 41               | 1                | 0              | 4.455049                | -0.981967 | -1.516010 |
| 42               | 1                | 0              | 3.862892                | 0.636355  | -1.937168 |
| 43               | 6                | 0              | 6.554956                | -0.122913 | 0.109356  |
| 44               | 1                | 0              | 6.190448                | -0.704466 | 2.171651  |
| 45               | 1                | 0              | 5.640996                | 0.922705  | 1.762924  |
| 46               | 1                | 0              | 6.360398                | 0.549783  | -1.948193 |
| 47               | 1                | 0              | 5.745727                | 1.686883  | -0.745666 |
| 48               | 1                | 0              | 7.540010                | 0.316386  | 0.283238  |
| 49               | 1                | 0              | 6.714592                | -1.162373 | -0.200437 |
| 50               | 7                | 0              | 3.668764                | 0.170565  | 0.079339  |
| 51               | 1                | 0              | -1.965245               | 4.251672  | 0.004831  |

-----

### Structure 19b (CHCl<sub>3</sub>)

Energy (Hartrees): = -1112.8001689  
 Imaginary frequency -21.90

Standard orientation:

| Center<br>Number | Atomic<br>Number | Atomic<br>Type | Coordinates (Angstroms) |           |           |
|------------------|------------------|----------------|-------------------------|-----------|-----------|
|                  |                  |                | X                       | Y         | Z         |
| 1                | 6                | 0              | -1.542100               | -1.837834 | -0.183517 |
| 2                | 6                | 0              | -2.636219               | -1.042839 | 0.033260  |
| 3                | 6                | 0              | -2.441781               | 0.387588  | 0.065602  |
| 4                | 6                | 0              | -1.124517               | 0.937951  | -0.003916 |
| 5                | 6                | 0              | 0.015015                | 0.056088  | -0.098199 |
| 6                | 6                | 0              | -0.223817               | -1.302557 | -0.237660 |
| 7                | 6                | 0              | -4.004588               | -1.688890 | 0.188413  |
| 8                | 6                | 0              | -1.017911               | 2.360006  | -0.047925 |
| 9                | 6                | 0              | -2.122067               | 3.173089  | 0.033390  |
| 10               | 6                | 0              | -3.416219               | 2.631446  | 0.131337  |
| 11               | 6                | 0              | -3.556983               | 1.266330  | 0.138733  |
| 12               | 6                | 0              | -4.045291               | -2.719961 | 1.325526  |
| 13               | 6                | 0              | -4.488639               | -2.289462 | -1.137612 |
| 14               | 6                | 0              | -4.602800               | 3.553077  | 0.215185  |
| 15               | 6                | 0              | 1.410556                | 0.480247  | 0.048391  |
| 16               | 1                | 0              | 1.644374                | 1.488379  | 0.368717  |
| 17               | 1                | 0              | -4.559662               | 0.866713  | 0.175032  |
| 18               | 1                | 0              | -4.715557               | -0.916108 | 0.470576  |
| 19               | 1                | 0              | -5.077750               | -3.042642 | 1.485706  |
| 20               | 1                | 0              | -3.681088               | -2.283996 | 2.259302  |
| 21               | 1                | 0              | -3.442997               | -3.598649 | 1.097724  |
| 22               | 1                | 0              | -5.494822               | -2.701224 | -1.019993 |
| 23               | 1                | 0              | -4.521777               | -1.527562 | -1.920703 |
| 24               | 1                | 0              | -3.826544               | -3.092775 | -1.465945 |
| 25               | 8                | 0              | -1.659310               | -3.182851 | -0.318432 |
| 26               | 1                | 0              | -0.767310               | -3.546417 | -0.414626 |
| 27               | 8                | 0              | 0.733532                | -2.225791 | -0.385079 |
| 28               | 1                | 0              | 1.621471                | -1.739703 | -0.376741 |
| 29               | 1                | 0              | -5.537961               | 2.991760  | 0.216856  |
| 30               | 1                | 0              | -4.620648               | 4.247104  | -0.629272 |
| 31               | 1                | 0              | -4.563976               | 4.152494  | 1.129125  |
| 32               | 8                | 0              | 0.221480                | 2.905936  | -0.201057 |
| 33               | 1                | 0              | 0.137693                | 3.864497  | -0.268130 |
| 34               | 7                | 0              | 2.369195                | -0.346037 | -0.154565 |
| 35               | 6                | 0              | 4.306711                | -0.658471 | 1.109768  |
| 36               | 6                | 0              | 4.419122                | 0.121319  | -1.172412 |
| 37               | 6                | 0              | 5.715104                | -0.153532 | 1.399748  |
| 38               | 1                | 0              | 4.342429                | -1.704732 | 0.761915  |
| 39               | 1                | 0              | 3.687417                | -0.623248 | 2.008170  |
| 40               | 6                | 0              | 5.831977                | 0.654271  | -0.966980 |
| 41               | 1                | 0              | 4.452881                | -0.919561 | -1.535322 |
| 42               | 1                | 0              | 3.881170                | 0.718801  | -1.910970 |
| 43               | 6                | 0              | 6.554089                | -0.138309 | 0.122378  |
| 44               | 1                | 0              | 6.172492                | -0.790980 | 2.160458  |
| 45               | 1                | 0              | 5.648694                | 0.858665  | 1.811168  |
| 46               | 1                | 0              | 6.374355                | 0.599384  | -1.914149 |
| 47               | 1                | 0              | 5.773269                | 1.709133  | -0.679597 |
| 48               | 1                | 0              | 7.542054                | 0.286529  | 0.315598  |
| 49               | 1                | 0              | 6.704795                | -1.168157 | -0.221986 |
| 50               | 7                | 0              | 3.669406                | 0.189711  | 0.091329  |
| 51               | 1                | 0              | -1.986668               | 4.250879  | -0.004780 |

### Structure 19b (DMSO)

Energy (Hartrees): = -1112.7945042

Imaginary frequency -27.36

Standard orientation:

| Center<br>Number | Atomic<br>Number | Atomic<br>Type | Coordinates (Angstroms) |           |           |
|------------------|------------------|----------------|-------------------------|-----------|-----------|
|                  |                  |                | X                       | Y         | Z         |
| 1                | 6                | 0              | -1.541826               | -1.838000 | -0.187278 |
| 2                | 6                | 0              | -2.638256               | -1.042809 | 0.021412  |
| 3                | 6                | 0              | -2.443499               | 0.388043  | 0.062225  |
| 4                | 6                | 0              | -1.126303               | 0.938282  | -0.014617 |
| 5                | 6                | 0              | 0.013728                | 0.057274  | -0.105075 |
| 6                | 6                | 0              | -0.223103               | -1.302335 | -0.237775 |
| 7                | 6                | 0              | -4.007305               | -1.689466 | 0.165316  |
| 8                | 6                | 0              | -1.018161               | 2.360196  | -0.067223 |
| 9                | 6                | 0              | -2.119448               | 3.175922  | 0.027458  |
| 10               | 6                | 0              | -3.412365               | 2.634381  | 0.147930  |
| 11               | 6                | 0              | -3.556352               | 1.268753  | 0.154408  |
| 12               | 6                | 0              | -4.060107               | -2.684490 | 1.332584  |
| 13               | 6                | 0              | -4.466598               | -2.332647 | -1.149203 |
| 14               | 6                | 0              | -4.596273               | 3.556649  | 0.251605  |
| 15               | 6                | 0              | 1.408203                | 0.482287  | 0.051350  |
| 16               | 1                | 0              | 1.639590                | 1.488968  | 0.378421  |
| 17               | 1                | 0              | -4.559704               | 0.872972  | 0.211228  |
| 18               | 1                | 0              | -4.729744               | -0.914008 | 0.405744  |
| 19               | 1                | 0              | -5.087584               | -3.033124 | 1.467550  |

|    |   |   |           |           |           |
|----|---|---|-----------|-----------|-----------|
| 20 | 1 | 0 | -3.741589 | -2.208579 | 2.263686  |
| 21 | 1 | 0 | -3.425017 | -3.551734 | 1.153267  |
| 22 | 1 | 0 | -5.478842 | -2.730358 | -1.036321 |
| 23 | 1 | 0 | -4.480152 | -1.596851 | -1.957587 |
| 24 | 1 | 0 | -3.807324 | -3.152514 | -1.438802 |
| 25 | 8 | 0 | -1.653904 | -3.183901 | -0.316002 |
| 26 | 1 | 0 | -0.759479 | -3.540515 | -0.413264 |
| 27 | 8 | 0 | 0.735941  | -2.224026 | -0.376310 |
| 28 | 1 | 0 | 1.622476  | -1.732500 | -0.365079 |
| 29 | 1 | 0 | -5.531204 | 2.995179  | 0.269625  |
| 30 | 1 | 0 | -4.625441 | 4.250463  | -0.592657 |
| 31 | 1 | 0 | -4.539777 | 4.157628  | 1.163586  |
| 32 | 8 | 0 | 0.219088  | 2.901001  | -0.244102 |
| 33 | 1 | 0 | 0.135905  | 3.861771  | -0.294233 |
| 34 | 7 | 0 | 2.366893  | -0.344335 | -0.147438 |
| 35 | 6 | 0 | 4.309562  | -0.692161 | 1.097599  |
| 36 | 6 | 0 | 4.411471  | 0.158669  | -1.161059 |
| 37 | 6 | 0 | 5.718047  | -0.193618 | 1.397066  |
| 38 | 1 | 0 | 4.346202  | -1.725901 | 0.715276  |
| 39 | 1 | 0 | 3.693706  | -0.685680 | 1.999186  |
| 40 | 6 | 0 | 5.823622  | 0.687682  | -0.943048 |
| 41 | 1 | 0 | 4.447072  | -0.870865 | -1.553782 |
| 42 | 1 | 0 | 3.870122  | 0.778159  | -1.878918 |
| 43 | 6 | 0 | 6.551002  | -0.138046 | 0.117352  |
| 44 | 1 | 0 | 6.178306  | -0.853964 | 2.136068  |
| 45 | 1 | 0 | 5.652865  | 0.805624  | 1.839915  |
| 46 | 1 | 0 | 6.362108  | 0.664343  | -1.893567 |
| 47 | 1 | 0 | 5.764611  | 1.732719  | -0.621220 |
| 48 | 1 | 0 | 7.539343  | 0.282081  | 0.318985  |
| 49 | 1 | 0 | 6.699760  | -1.156493 | -0.259933 |
| 50 | 7 | 0 | 3.666385  | 0.186800  | 0.108115  |
| 51 | 1 | 0 | -1.984384 | 4.253926  | -0.016751 |

### Structure 19c (vacuum)

Energy (Hartrees): = -1112.7769209  
 No imaginary frequencies

Standard orientation:

| Center<br>Number | Atomic<br>Number | Atomic<br>Type | Coordinates (Angstroms) |           |           |
|------------------|------------------|----------------|-------------------------|-----------|-----------|
|                  |                  |                | X                       | Y         | Z         |
| 1                | 6                | 0              | -1.671973               | -1.850779 | -0.010927 |
| 2                | 6                | 0              | -2.711779               | -0.960516 | 0.052331  |
| 3                | 6                | 0              | -2.398405               | 0.444951  | 0.023225  |
| 4                | 6                | 0              | -1.035581               | 0.883223  | -0.005854 |
| 5                | 6                | 0              | 0.031392                | -0.087948 | 0.017095  |
| 6                | 6                | 0              | -0.316691               | -1.425852 | -0.028772 |
| 7                | 6                | 0              | -4.133624               | -1.496177 | 0.119928  |
| 8                | 6                | 0              | -0.819892               | 2.290874  | -0.112523 |
| 9                | 6                | 0              | -1.856029               | 3.189664  | -0.124710 |
| 10               | 6                | 0              | -3.192590               | 2.759469  | -0.060645 |
| 11               | 6                | 0              | -3.438708               | 1.414123  | 0.003604  |
| 12               | 6                | 0              | -4.364999               | -2.367064 | 1.363497  |
| 13               | 6                | 0              | -4.518739               | -2.233316 | -1.170672 |
| 14               | 6                | 0              | -4.304842               | 3.773087  | -0.083071 |
| 15               | 6                | 0              | 1.452445                | 0.259500  | 0.167316  |
| 16               | 1                | 0              | 1.695663                | 1.279611  | 0.416353  |
| 17               | 1                | 0              | -4.469670               | 1.095169  | 0.023263  |
| 18               | 1                | 0              | -4.816864               | -0.655748 | 0.215052  |
| 19               | 1                | 0              | -5.419866               | -2.647812 | 1.423742  |
| 20               | 1                | 0              | -4.106327               | -1.817262 | 2.271169  |
| 21               | 1                | 0              | -3.767948               | -3.277137 | 1.327957  |
| 22               | 1                | 0              | -5.563313               | -2.552161 | -1.121564 |
| 23               | 1                | 0              | -4.400775               | -1.579083 | -2.037541 |
| 24               | 1                | 0              | -3.895649               | -3.115828 | -1.315057 |
| 25               | 8                | 0              | -1.884694               | -3.191606 | -0.036814 |
| 26               | 1                | 0              | -1.015001               | -3.612496 | -0.057629 |
| 27               | 8                | 0              | 0.567310                | -2.439840 | -0.055239 |
| 28               | 1                | 0              | 1.477490                | -2.032427 | -0.054806 |
| 29               | 1                | 0              | -5.279107               | 3.288461  | -0.014748 |
| 30               | 1                | 0              | -4.280516               | 4.359957  | -1.005145 |
| 31               | 1                | 0              | -4.213304               | 4.471083  | 0.753194  |
| 32               | 8                | 0              | 0.465389                | 2.753340  | -0.228227 |
| 33               | 1                | 0              | 0.431005                | 3.702250  | -0.373861 |
| 34               | 7                | 0              | 2.357897                | -0.644725 | 0.043217  |
| 35               | 6                | 0              | 4.495218                | -1.171690 | -0.663659 |
| 36               | 6                | 0              | 4.094870                | 1.003181  | 0.394612  |
| 37               | 6                | 0              | 5.969516                | -1.123252 | -0.290631 |
| 38               | 1                | 0              | 4.356399                | -0.782417 | -1.686347 |
| 39               | 1                | 0              | 4.114412                | -2.193398 | -0.642162 |
| 40               | 6                | 0              | 5.575101                | 1.101287  | 0.754999  |
| 41               | 1                | 0              | 3.881499                | 1.544766  | -0.544703 |
| 42               | 1                | 0              | 3.509606                | 1.471932  | 1.187981  |
| 43               | 6                | 0              | 6.447447                | 0.325504  | -0.228136 |

|    |   |   |           |           |           |
|----|---|---|-----------|-----------|-----------|
| 44 | 1 | 0 | 6.542377  | -1.695784 | -1.023800 |
| 45 | 1 | 0 | 6.106294  | -1.599320 | 0.685411  |
| 46 | 1 | 0 | 5.858746  | 2.156064  | 0.785741  |
| 47 | 1 | 0 | 5.713714  | 0.693750  | 1.761225  |
| 48 | 1 | 0 | 7.497539  | 0.377686  | 0.067873  |
| 49 | 1 | 0 | 6.367250  | 0.777427  | -1.224006 |
| 50 | 7 | 0 | 3.687057  | -0.391493 | 0.277713  |
| 51 | 1 | 0 | -1.635198 | 4.251474  | -0.203894 |

### Structure 19c (CHCl<sub>3</sub>)

Energy (Hartrees): = -1112.8035285  
No imaginary frequencies

Standard orientation:

| Center Number | Atomic Number | Atomic Type | Coordinates (Angstroms) |           |           |
|---------------|---------------|-------------|-------------------------|-----------|-----------|
|               |               |             | X                       | Y         | Z         |
| 1             | 6             | 0           | -1.665743               | -1.850882 | -0.008874 |
| 2             | 6             | 0           | -2.710488               | -0.964038 | 0.044948  |
| 3             | 6             | 0           | -2.401754               | 0.443709  | 0.021098  |
| 4             | 6             | 0           | -1.039834               | 0.885218  | -0.021607 |
| 5             | 6             | 0           | 0.031537                | -0.081546 | 0.009689  |
| 6             | 6             | 0           | -0.311667               | -1.421768 | -0.024954 |
| 7             | 6             | 0           | -4.132832               | -1.503707 | 0.099315  |
| 8             | 6             | 0           | -0.824448               | 2.293619  | -0.148139 |
| 9             | 6             | 0           | -1.861946               | 3.192354  | -0.142436 |
| 10            | 6             | 0           | -3.196903               | 2.759570  | -0.041355 |
| 11            | 6             | 0           | -3.444120               | 1.412887  | 0.026826  |
| 12            | 6             | 0           | -4.382754               | -2.341930 | 1.360979  |
| 13            | 6             | 0           | -4.498338               | -2.277806 | -1.175090 |
| 14            | 6             | 0           | -4.307659               | 3.774158  | -0.036270 |
| 15            | 6             | 0           | 1.451909                | 0.273031  | 0.168364  |
| 16            | 1             | 0           | 1.693210                | 1.290210  | 0.432189  |
| 17            | 1             | 0           | -4.474793               | 1.095530  | 0.076870  |
| 18            | 1             | 0           | -4.821136               | -0.664183 | 0.153731  |
| 19            | 1             | 0           | -5.434876               | -2.637131 | 1.405517  |
| 20            | 1             | 0           | -4.155094               | -1.765285 | 2.261121  |
| 21            | 1             | 0           | -3.773698               | -3.246324 | 1.367514  |
| 22            | 1             | 0           | -5.550925               | -2.573140 | -1.141219 |
| 23            | 1             | 0           | -4.349217               | -1.657290 | -2.062475 |
| 24            | 1             | 0           | -3.893221               | -3.179012 | -1.278400 |
| 25            | 8             | 0           | -1.877483               | -3.192068 | -0.025157 |
| 26            | 1             | 0           | -1.011099               | -3.623153 | -0.041645 |
| 27            | 8             | 0           | 0.578528                | -2.430752 | -0.040016 |
| 28            | 1             | 0           | 1.488268                | -2.014369 | -0.049805 |
| 29            | 1             | 0           | -5.280688               | 3.293637  | 0.073894  |
| 30            | 1             | 0           | -4.314483               | 4.349245  | -0.966514 |
| 31            | 1             | 0           | -4.183090               | 4.485573  | 0.784595  |
| 32            | 8             | 0           | 0.454830                | 2.743983  | -0.303131 |
| 33            | 1             | 0           | 0.434185                | 3.697805  | -0.444185 |
| 34            | 7             | 0           | 2.357237                | -0.631157 | 0.039944  |
| 35            | 6             | 0           | 4.494700                | -1.172250 | -0.658226 |
| 36            | 6             | 0           | 4.098540                | 1.007370  | 0.405298  |
| 37            | 6             | 0           | 5.967966                | -1.126133 | -0.283190 |
| 38            | 1             | 0           | 4.357533                | -0.779140 | -1.678516 |
| 39            | 1             | 0           | 4.113317                | -2.194019 | -0.638051 |
| 40            | 6             | 0           | 5.578341                | 1.098166  | 0.767222  |
| 41            | 1             | 0           | 3.889308                | 1.547392  | -0.534762 |
| 42            | 1             | 0           | 3.514271                | 1.477390  | 1.198417  |
| 43            | 6             | 0           | 6.449411                | 0.321055  | -0.215673 |
| 44            | 1             | 0           | 6.537498                | -1.697011 | -1.020434 |
| 45            | 1             | 0           | 6.105879                | -1.607495 | 0.690613  |
| 46            | 1             | 0           | 5.862633                | 2.152815  | 0.797659  |
| 47            | 1             | 0           | 5.716114                | 0.691292  | 1.774176  |
| 48            | 1             | 0           | 7.498807                | 0.367694  | 0.084713  |
| 49            | 1             | 0           | 6.372867                | 0.775523  | -1.210708 |
| 50            | 7             | 0           | 3.684288                | -0.388173 | 0.283147  |
| 51            | 1             | 0           | -1.642741               | 4.252985  | -0.237052 |

### Structure 19c (DMSO)

Energy (Hartrees): = -1112.7985147  
No imaginary frequencies

Standard orientation:

| Center Number | Atomic Number | Atomic Type | Coordinates (Angstroms) |           |           |
|---------------|---------------|-------------|-------------------------|-----------|-----------|
|               |               |             | X                       | Y         | Z         |
| 1             | 6             | 0           | -1.654945               | -1.851533 | 0.001587  |
| 2             | 6             | 0           | -2.705890               | -0.970785 | 0.038044  |
| 3             | 6             | 0           | -2.404703               | 0.439070  | 0.012704  |
| 4             | 6             | 0           | -1.044736               | 0.889393  | -0.024731 |

|    |   |   |           |           |           |
|----|---|---|-----------|-----------|-----------|
| 5  | 6 | 0 | 0.032799  | -0.071045 | 0.012907  |
| 6  | 6 | 0 | -0.302879 | -1.414069 | -0.013461 |
| 7  | 6 | 0 | -4.126009 | -1.516990 | 0.079531  |
| 8  | 6 | 0 | -0.837998 | 2.299762  | -0.150885 |
| 9  | 6 | 0 | -1.881440 | 3.192522  | -0.143233 |
| 10 | 6 | 0 | -3.213684 | 2.750431  | -0.045771 |
| 11 | 6 | 0 | -3.453671 | 1.401308  | 0.015566  |
| 12 | 6 | 0 | -4.387930 | -2.338382 | 1.349156  |
| 13 | 6 | 0 | -4.467840 | -2.313386 | -1.187192 |
| 14 | 6 | 0 | -4.330670 | 3.756997  | -0.017823 |
| 15 | 6 | 0 | 1.452477  | 0.290800  | 0.169540  |
| 16 | 1 | 0 | 1.694645  | 1.309809  | 0.425970  |
| 17 | 1 | 0 | -4.482998 | 1.078573  | 0.061797  |
| 18 | 1 | 0 | -4.820702 | -0.681781 | 0.109971  |
| 19 | 1 | 0 | -5.439236 | -2.637430 | 1.384404  |
| 20 | 1 | 0 | -4.174849 | -1.748650 | 2.244631  |
| 21 | 1 | 0 | -3.774714 | -3.240027 | 1.374970  |
| 22 | 1 | 0 | -5.519266 | -2.613365 | -1.162785 |
| 23 | 1 | 0 | -4.311078 | -1.706366 | -2.082757 |
| 24 | 1 | 0 | -3.857067 | -3.213311 | -1.267551 |
| 25 | 8 | 0 | -1.855785 | -3.194260 | -0.001812 |
| 26 | 1 | 0 | -0.984391 | -3.614375 | -0.014257 |
| 27 | 8 | 0 | 0.593282  | -2.416832 | -0.020612 |
| 28 | 1 | 0 | 1.500614  | -1.989695 | -0.034270 |
| 29 | 1 | 0 | -5.303511 | 3.266578  | -0.071890 |
| 30 | 1 | 0 | -4.249209 | 4.456778  | -0.853556 |
| 31 | 1 | 0 | -4.296081 | 4.347224  | 0.902552  |
| 32 | 8 | 0 | 0.436574  | 2.757225  | -0.307665 |
| 33 | 1 | 0 | 0.410449  | 3.716311  | -0.415925 |
| 34 | 7 | 0 | 2.357299  | -0.615388 | 0.046857  |
| 35 | 6 | 0 | 4.490141  | -1.176071 | -0.648746 |
| 36 | 6 | 0 | 4.105026  | 1.019372  | 0.392900  |
| 37 | 6 | 0 | 5.963569  | -1.131570 | -0.275870 |
| 38 | 1 | 0 | 4.354139  | -0.791164 | -1.671952 |
| 39 | 1 | 0 | 4.104095  | -2.196073 | -0.616474 |
| 40 | 6 | 0 | 5.585775  | 1.106218  | 0.750481  |
| 41 | 1 | 0 | 3.898176  | 1.547914  | -0.553559 |
| 42 | 1 | 0 | 3.524099  | 1.500915  | 1.181493  |
| 43 | 6 | 0 | 6.451074  | 0.313971  | -0.224936 |
| 44 | 1 | 0 | 6.528498  | -1.713052 | -1.008293 |
| 45 | 1 | 0 | 6.102011  | -1.603370 | 0.702749  |
| 46 | 1 | 0 | 5.873779  | 2.160032  | 0.766774  |
| 47 | 1 | 0 | 5.725077  | 0.711663  | 1.762320  |
| 48 | 1 | 0 | 7.501032  | 0.358767  | 0.073775  |
| 49 | 1 | 0 | 6.374291  | 0.757738  | -1.224614 |
| 50 | 7 | 0 | 3.683876  | -0.376567 | 0.285159  |
| 51 | 1 | 0 | -1.669382 | 4.254893  | -0.235521 |

### Structure 19d (vacuum)

Energy (Hartrees): = -1112.7654254  
Imaginary frequency -47.00

Standard orientation:

| Center Number | Atomic Number | Atomic Type | Coordinates (Angstroms) |           |           |
|---------------|---------------|-------------|-------------------------|-----------|-----------|
|               |               |             | X                       | Y         | Z         |
| 1             | 6             | 0           | -1.797148               | -1.829768 | -0.110680 |
| 2             | 6             | 0           | -2.741389               | -0.851423 | 0.043965  |
| 3             | 6             | 0           | -2.304393               | 0.524855  | 0.040792  |
| 4             | 6             | 0           | -0.911867               | 0.842300  | -0.022550 |
| 5             | 6             | 0           | 0.059652                | -0.224379 | -0.095196 |
| 6             | 6             | 0           | -0.406430               | -1.529429 | -0.176247 |
| 7             | 6             | 0           | -4.200940               | -1.254402 | 0.181157  |
| 8             | 6             | 0           | -0.571122               | 2.225493  | -0.057058 |
| 9             | 6             | 0           | -1.523389               | 3.212851  | -0.007664 |
| 10            | 6             | 0           | -2.890977               | 2.900559  | 0.059812  |
| 11            | 6             | 0           | -3.254614               | 1.579340  | 0.080607  |
| 12            | 6             | 0           | -4.437291               | -2.181772 | 1.382699  |
| 13            | 6             | 0           | -4.733927               | -1.865321 | -1.122054 |
| 14            | 6             | 0           | -3.909136               | 4.008593  | 0.092270  |
| 15            | 6             | 0           | 1.508683                | -0.045166 | -0.034687 |
| 16            | 1             | 0           | 1.904174                | 0.944150  | 0.154553  |
| 17            | 1             | 0           | -4.309454               | 1.351900  | 0.106812  |
| 18            | 1             | 0           | -4.788018               | -0.361125 | 0.380914  |
| 19            | 1             | 0           | -5.510610               | -2.343134 | 1.512181  |
| 20            | 1             | 0           | -4.048136               | -1.732305 | 2.298991  |
| 21            | 1             | 0           | -3.958221               | -3.148940 | 1.240729  |
| 22            | 1             | 0           | -5.795896               | -2.102109 | -1.017924 |
| 23            | 1             | 0           | -4.618160               | -1.165110 | -1.952513 |
| 24            | 1             | 0           | -4.197319               | -2.783143 | -1.364590 |
| 25            | 8             | 0           | -2.132243               | -3.141991 | -0.182954 |
| 26            | 1             | 0           | -1.305239               | -3.636520 | -0.265527 |
| 27            | 8             | 0           | 0.377176                | -2.602637 | -0.284742 |

|    |   |   |           |           |           |
|----|---|---|-----------|-----------|-----------|
| 28 | 1 | 0 | 1.343040  | -2.266741 | -0.294210 |
| 29 | 1 | 0 | -4.919733 | 3.610326  | 0.184585  |
| 30 | 1 | 0 | -3.862238 | 4.608895  | -0.820219 |
| 31 | 1 | 0 | -3.728860 | 4.678580  | 0.936747  |
| 32 | 8 | 0 | 0.750927  | 2.571637  | -0.158292 |
| 33 | 1 | 0 | 0.811551  | 3.528774  | -0.215594 |
| 34 | 7 | 0 | 2.297459  | -1.049764 | -0.179232 |
| 35 | 6 | 0 | 4.183068  | 0.046274  | -1.159811 |
| 36 | 6 | 0 | 4.085568  | -0.309495 | 1.243242  |
| 37 | 6 | 0 | 5.707481  | 0.089223  | -1.130586 |
| 38 | 1 | 0 | 3.781519  | 1.072439  | -1.072962 |
| 39 | 1 | 0 | 3.819749  | -0.374544 | -2.099605 |
| 40 | 6 | 0 | 5.607129  | -0.283003 | 1.347210  |
| 41 | 1 | 0 | 3.689675  | 0.705163  | 1.427941  |
| 42 | 1 | 0 | 3.652556  | -0.979194 | 1.989257  |
| 43 | 6 | 0 | 6.204173  | 0.575370  | 0.231565  |
| 44 | 1 | 0 | 6.068383  | 0.739072  | -1.931624 |
| 45 | 1 | 0 | 6.086222  | -0.919252 | -1.321172 |
| 46 | 1 | 0 | 5.898170  | 0.097443  | 2.329414  |
| 47 | 1 | 0 | 5.978911  | -1.308262 | 1.261906  |
| 48 | 1 | 0 | 7.295609  | 0.553721  | 0.272495  |
| 49 | 1 | 0 | 5.897068  | 1.618312  | 0.375983  |
| 50 | 7 | 0 | 3.705112  | -0.813380 | -0.076761 |
| 51 | 1 | 0 | -1.208414 | 4.253343  | -0.037439 |

### Structure 19d (CHCl<sub>3</sub>)

Energy (Hartrees): = -1112.7917333  
Imaginary frequency -77.63

Standard orientation:

| Center<br>Number | Atomic<br>Number | Atomic<br>Type | Coordinates (Angstroms) |           |           |
|------------------|------------------|----------------|-------------------------|-----------|-----------|
|                  |                  |                | X                       | Y         | Z         |
| 1                | 6                | 0              | -1.795357               | -1.829501 | -0.129783 |
| 2                | 6                | 0              | -2.740086               | -0.852135 | 0.038743  |
| 3                | 6                | 0              | -2.305440               | 0.526015  | 0.037515  |
| 4                | 6                | 0              | -0.914343               | 0.844776  | -0.054796 |
| 5                | 6                | 0              | 0.058002                | -0.220401 | -0.139541 |
| 6                | 6                | 0              | -0.406313               | -1.526509 | -0.215072 |
| 7                | 6                | 0              | -4.198294               | -1.257438 | 0.193616  |
| 8                | 6                | 0              | -0.571251               | 2.228430  | -0.114281 |
| 9                | 6                | 0              | -1.521188               | 3.217006  | -0.032066 |
| 10               | 6                | 0              | -2.886320               | 2.903486  | 0.086861  |
| 11               | 6                | 0              | -3.254099               | 1.581734  | 0.113726  |
| 12               | 6                | 0              | -4.421858               | -2.154862 | 1.419434  |
| 13               | 6                | 0              | -4.743188               | -1.902557 | -1.087630 |
| 14               | 6                | 0              | -3.900340               | 4.012887  | 0.161774  |
| 15               | 6                | 0              | 1.507565                | -0.038561 | -0.057720 |
| 16               | 1                | 0              | 1.899312                | 0.945063  | 0.167972  |
| 17               | 1                | 0              | -4.308630               | 1.358021  | 0.176020  |
| 18               | 1                | 0              | -4.788521               | -0.362223 | 0.370761  |
| 19               | 1                | 0              | -5.492834               | -2.328902 | 1.555325  |
| 20               | 1                | 0              | -4.041210               | -1.677553 | 2.325926  |
| 21               | 1                | 0              | -3.930459               | -3.120877 | 1.306214  |
| 22               | 1                | 0              | -5.807239               | -2.125194 | -0.969737 |
| 23               | 1                | 0              | -4.630400               | -1.228476 | -1.940500 |
| 24               | 1                | 0              | -4.220455               | -2.833226 | -1.312211 |
| 25               | 8                | 0              | -2.133229               | -3.141995 | -0.191820 |
| 26               | 1                | 0              | -1.313418               | -3.650000 | -0.281388 |
| 27               | 8                | 0              | 0.382737                | -2.595653 | -0.329849 |
| 28               | 1                | 0              | 1.348157                | -2.249260 | -0.340138 |
| 29               | 1                | 0              | -4.910270               | 3.615993  | 0.271402  |
| 30               | 1                | 0              | -3.871814               | 4.629226  | -0.741128 |
| 31               | 1                | 0              | -3.696241               | 4.669228  | 1.012023  |
| 32               | 8                | 0              | 0.742208                | 2.563356  | -0.276856 |
| 33               | 1                | 0              | 0.815387                | 3.522665  | -0.349173 |
| 34               | 7                | 0              | 2.296745                | -1.040084 | -0.217190 |
| 35               | 6                | 0              | 4.204736                | 0.060936  | -1.141328 |
| 36               | 6                | 0              | 4.061311                | -0.332489 | 1.256417  |
| 37               | 6                | 0              | 5.727454                | 0.109545  | -1.080838 |
| 38               | 1                | 0              | 3.795387                | 1.080984  | -1.039436 |
| 39               | 1                | 0              | 3.862214                | -0.343339 | -2.096548 |
| 40               | 6                | 0              | 5.580035                | -0.305243 | 1.389219  |
| 41               | 1                | 0              | 3.661078                | 0.678153  | 1.443017  |
| 42               | 1                | 0              | 3.615935                | -1.012251 | 1.986275  |
| 43               | 6                | 0              | 6.197380                | 0.571056  | 0.299104  |
| 44               | 1                | 0              | 6.097535                | 0.778298  | -1.862112 |
| 45               | 1                | 0              | 6.117671                | -0.892070 | -1.286783 |
| 46               | 1                | 0              | 5.847595                | 0.062606  | 2.382969  |
| 47               | 1                | 0              | 5.959218                | -1.327964 | 1.299781  |
| 48               | 1                | 0              | 7.288094                | 0.546831  | 0.359860  |
| 49               | 1                | 0              | 5.887356                | 1.611231  | 0.455779  |
| 50               | 7                | 0              | 3.705703                | -0.820696 | -0.080714 |
| 51               | 1                | 0              | -1.204745               | 4.255785  | -0.080769 |

-----  
**Structure 19d (DMSO)**

Energy (Hartrees): = -1112.7866405  
Imaginary frequency -28.66

Standard orientation:

| Center Number | Atomic Number | Atomic Type | Coordinates (Angstroms) |           |           |
|---------------|---------------|-------------|-------------------------|-----------|-----------|
|               |               |             | X                       | Y         | Z         |
| 1             | 6             | 0           | 1.789015                | -1.832636 | -0.104161 |
| 2             | 6             | 0           | 2.740505                | -0.857457 | 0.034681  |
| 3             | 6             | 0           | 2.309325                | 0.522305  | 0.038014  |
| 4             | 6             | 0           | 0.917078                | 0.846644  | -0.029401 |
| 5             | 6             | 0           | -0.060719               | -0.216565 | -0.098911 |
| 6             | 6             | 0           | 0.399158                | -1.525803 | -0.162509 |
| 7             | 6             | 0           | 4.201498                | -1.264862 | 0.152940  |
| 8             | 6             | 0           | 0.580516                | 2.233522  | -0.067388 |
| 9             | 6             | 0           | 1.537785                | 3.217362  | -0.008940 |
| 10            | 6             | 0           | 2.903767                | 2.897013  | 0.074736  |
| 11            | 6             | 0           | 3.265436                | 1.572837  | 0.094128  |
| 12            | 6             | 0           | 4.712595                | -1.906074 | -1.143521 |
| 13            | 6             | 0           | 4.454576                | -2.166090 | 1.369438  |
| 14            | 6             | 0           | 3.924775                | 4.000522  | 0.124413  |
| 15            | 6             | 0           | -1.511947               | -0.029398 | -0.047125 |
| 16            | 1             | 0           | -1.909452               | 0.962731  | 0.121423  |
| 17            | 1             | 0           | 4.320014                | 1.344343  | 0.136858  |
| 18            | 1             | 0           | 4.798258                | -0.371879 | 0.317156  |
| 19            | 1             | 0           | 5.778289                | -2.132666 | -1.051330 |
| 20            | 1             | 0           | 4.584197                | -1.226087 | -1.989775 |
| 21            | 1             | 0           | 4.181535                | -2.833844 | -1.362215 |
| 22            | 1             | 0           | 5.528395                | -2.342866 | 1.475109  |
| 23            | 1             | 0           | 4.101329                | -1.688906 | 2.287310  |
| 24            | 1             | 0           | 3.956990                | -3.130431 | 1.268008  |
| 25            | 8             | 0           | 2.118527                | -3.146918 | -0.168671 |
| 26            | 1             | 0           | 1.291655                | -3.644922 | -0.242099 |
| 27            | 8             | 0           | -0.394554               | -2.592999 | -0.253989 |
| 28            | 1             | 0           | -1.360827               | -2.234698 | -0.262739 |
| 29            | 1             | 0           | 4.933153                | 3.598355  | 0.229648  |
| 30            | 1             | 0           | 3.730601                | 4.670512  | 0.966158  |
| 31            | 1             | 0           | 3.888834                | 4.604439  | -0.786605 |
| 32            | 8             | 0           | -0.733199               | 2.579486  | -0.180608 |
| 33            | 1             | 0           | -0.801361               | 3.542116  | -0.214310 |
| 34            | 7             | 0           | -2.297542               | -1.038754 | -0.175857 |
| 35            | 6             | 0           | -4.097663               | -0.340823 | 1.243275  |
| 36            | 6             | 0           | -4.182772               | 0.075120  | -1.155180 |
| 37            | 6             | 0           | -5.618713               | -0.305398 | 1.339746  |
| 38            | 1             | 0           | -3.691776               | 0.664677  | 1.441750  |
| 39            | 1             | 0           | -3.674511               | -1.029188 | 1.978542  |
| 40            | 6             | 0           | -5.706609               | 0.118042  | -1.130615 |
| 41            | 1             | 0           | -3.785821               | 1.096154  | -1.032096 |
| 42            | 1             | 0           | -3.815743               | -0.318885 | -2.105754 |
| 43            | 6             | 0           | -6.207000               | 0.577037  | 0.239039  |
| 44            | 1             | 0           | -5.906134               | 0.060864  | 2.328430  |
| 45            | 1             | 0           | -6.002908               | -1.325670 | 1.239082  |
| 46            | 1             | 0           | -6.058777               | 0.787763  | -1.919104 |
| 47            | 1             | 0           | -6.091903               | -0.883577 | -1.347497 |
| 48            | 1             | 0           | -7.298937               | 0.556494  | 0.274598  |
| 49            | 1             | 0           | -5.895559               | 1.615031  | 0.405717  |
| 50            | 7             | 0           | -3.710201               | -0.819276 | -0.090271 |
| 51            | 1             | 0           | 1.224825                | 4.258002  | -0.043182 |

-----  
**Structure 20a (vacuum)**

Energy (Hartrees): = -1112.7681389  
Imaginary frequency -59.64

Standard orientation:

| Center Number | Atomic Number | Atomic Type | Coordinates (Angstroms) |           |           |
|---------------|---------------|-------------|-------------------------|-----------|-----------|
|               |               |             | X                       | Y         | Z         |
| 1             | 6             | 0           | -1.555313               | -1.864895 | -0.117521 |
| 2             | 6             | 0           | -2.623203               | -1.056511 | 0.103442  |
| 3             | 6             | 0           | -2.422164               | 0.387600  | 0.051395  |
| 4             | 6             | 0           | -1.111704               | 0.932653  | -0.077157 |
| 5             | 6             | 0           | 0.031274                | 0.035482  | -0.193174 |
| 6             | 6             | 0           | -0.195721               | -1.367384 | -0.260883 |
| 7             | 6             | 0           | -3.989582               | -1.680605 | 0.340513  |
| 8             | 6             | 0           | -1.016117               | 2.344492  | -0.135445 |
| 9             | 6             | 0           | -2.123412               | 3.163277  | -0.072310 |
| 10            | 6             | 0           | -3.409425               | 2.626737  | 0.034797  |
| 11            | 6             | 0           | -3.534466               | 1.256738  | 0.095291  |
| 12            | 6             | 0           | -3.983368               | -2.685985 | 1.501619  |

|    |   |   |           |           |           |
|----|---|---|-----------|-----------|-----------|
| 13 | 6 | 0 | -4.528898 | -2.313349 | -0.949155 |
| 14 | 6 | 0 | -4.607410 | 3.538035  | 0.079024  |
| 15 | 6 | 0 | 1.381484  | 0.460381  | -0.201149 |
| 16 | 1 | 0 | 1.621843  | 1.505445  | -0.106896 |
| 17 | 1 | 0 | -4.532490 | 0.848259  | 0.152690  |
| 18 | 1 | 0 | -4.682349 | -0.895781 | 0.638383  |
| 19 | 1 | 0 | -5.007474 | -3.007380 | 1.709105  |
| 20 | 1 | 0 | -3.581371 | -2.226217 | 2.407239  |
| 21 | 1 | 0 | -3.385206 | -3.564388 | 1.265487  |
| 22 | 1 | 0 | -5.525098 | -2.731278 | -0.780957 |
| 23 | 1 | 0 | -4.597045 | -1.569781 | -1.746872 |
| 24 | 1 | 0 | -3.868599 | -3.116686 | -1.280436 |
| 25 | 8 | 0 | -1.648745 | -3.211434 | -0.184692 |
| 26 | 1 | 0 | -0.730099 | -3.507519 | -0.314291 |
| 27 | 8 | 0 | 0.706826  | -2.246811 | -0.403119 |
| 28 | 1 | 0 | -5.534651 | 2.964858  | 0.101173  |
| 29 | 1 | 0 | -4.633890 | 4.192921  | -0.795620 |
| 30 | 1 | 0 | -4.582474 | 4.174856  | 0.967351  |
| 31 | 8 | 0 | 0.226142  | 2.917114  | -0.269601 |
| 32 | 1 | 0 | 0.111277  | 3.866246  | -0.361518 |
| 33 | 7 | 0 | 2.375423  | -0.386376 | -0.309946 |
| 34 | 6 | 0 | 4.116072  | 1.042377  | 0.482189  |
| 35 | 6 | 0 | 4.491528  | -1.289672 | -0.091732 |
| 36 | 6 | 0 | 5.604931  | 1.338211  | 0.331019  |
| 37 | 1 | 0 | 3.867934  | 0.793340  | 1.528077  |
| 38 | 1 | 0 | 3.550134  | 1.930479  | 0.201567  |
| 39 | 6 | 0 | 5.982593  | -1.051175 | -0.275906 |
| 40 | 1 | 0 | 4.280257  | -1.614069 | 0.940886  |
| 41 | 1 | 0 | 4.140552  | -2.070485 | -0.770280 |
| 42 | 6 | 0 | 6.448428  | 0.097867  | 0.615625  |
| 43 | 1 | 0 | 5.869119  | 2.156496  | 1.004449  |
| 44 | 1 | 0 | 5.788307  | 1.679795  | -0.692164 |
| 45 | 1 | 0 | 6.521039  | -1.972506 | -0.043667 |
| 46 | 1 | 0 | 6.174623  | -0.808587 | -1.325298 |
| 47 | 1 | 0 | 7.507366  | 0.308856  | 0.452831  |
| 48 | 1 | 0 | 6.332140  | -0.188765 | 1.667177  |
| 49 | 7 | 0 | 3.738860  | -0.065937 | -0.400463 |
| 50 | 1 | 0 | 2.076542  | -1.379780 | -0.426857 |
| 51 | 1 | 0 | -1.987312 | 4.241248  | -0.122295 |

### Structure 20a (CHCl<sub>3</sub>)

Energy (Hartrees): = -1112.7975316

Imaginary frequency -70.00

Standard orientation:

| Center<br>Number | Atomic<br>Number | Atomic<br>Type | Coordinates (Angstroms) |           |           |
|------------------|------------------|----------------|-------------------------|-----------|-----------|
|                  |                  |                | X                       | Y         | Z         |
| 1                | 6                | 0              | -1.557730               | -1.864536 | -0.142917 |
| 2                | 6                | 0              | -2.619645               | -1.057130 | 0.113893  |
| 3                | 6                | 0              | -2.420083               | 0.387825  | 0.054296  |
| 4                | 6                | 0              | -1.113770               | 0.927972  | -0.133320 |
| 5                | 6                | 0              | 0.026844                | 0.029731  | -0.268207 |
| 6                | 6                | 0              | -0.201387               | -1.370693 | -0.333726 |
| 7                | 6                | 0              | -3.979036               | -1.682512 | 0.390907  |
| 8                | 6                | 0              | -1.017833               | 2.339801  | -0.243424 |
| 9                | 6                | 0              | -2.118520               | 3.163511  | -0.130426 |
| 10               | 6                | 0              | -3.397540               | 2.632408  | 0.069272  |
| 11               | 6                | 0              | -3.526838               | 1.262538  | 0.151550  |
| 12               | 6                | 0              | -3.943658               | -2.667651 | 1.567965  |
| 13               | 6                | 0              | -4.548350               | -2.337319 | -0.874194 |
| 14               | 6                | 0              | -4.584391               | 3.550592  | 0.190874  |
| 15               | 6                | 0              | 1.379763                | 0.460408  | -0.242258 |
| 16               | 1                | 0              | 1.616214                | 1.501931  | -0.099483 |
| 17               | 1                | 0              | -4.522832               | 0.861733  | 0.272231  |
| 18               | 1                | 0              | -4.669898               | -0.896644 | 0.688050  |
| 19               | 1                | 0              | -4.960443               | -2.997030 | 1.799394  |
| 20               | 1                | 0              | -3.533632               | -2.190660 | 2.461873  |
| 21               | 1                | 0              | -3.340877               | -3.546273 | 1.340354  |
| 22               | 1                | 0              | -5.541104               | -2.750711 | -0.674909 |
| 23               | 1                | 0              | -4.639620               | -1.607662 | -1.683157 |
| 24               | 1                | 0              | -3.901061               | -3.148489 | -1.213378 |
| 25               | 8                | 0              | -1.654259               | -3.212997 | -0.201730 |
| 26               | 1                | 0              | -0.739682               | -3.513332 | -0.358138 |
| 27               | 8                | 0              | 0.695161                | -2.252372 | -0.500834 |
| 28               | 1                | 0              | -5.517400               | 2.985779  | 0.215542  |
| 29               | 1                | 0              | -4.629511               | 4.249044  | -0.648688 |
| 30               | 1                | 0              | -4.524672               | 4.144378  | 1.107658  |
| 31               | 8                | 0              | 0.210754                | 2.892149  | -0.483513 |
| 32               | 1                | 0              | 0.106872                | 3.841831  | -0.614704 |
| 33               | 7                | 0              | 2.383674                | -0.368196 | -0.360321 |
| 34               | 6                | 0              | 4.084124                | 0.989878  | 0.625673  |
| 35               | 6                | 0              | 4.510381                | -1.265515 | -0.187963 |
| 36               | 6                | 0              | 5.570290                | 1.320096  | 0.540407  |



|    |   |   |           |           |           |
|----|---|---|-----------|-----------|-----------|
| 37 | 1 | 0 | 3.820485  | 0.618116  | 1.629162  |
| 38 | 1 | 0 | 3.509431  | 1.894609  | 0.430899  |
| 39 | 6 | 0 | 6.000152  | -0.986688 | -0.312149 |
| 40 | 1 | 0 | 4.283364  | -1.694225 | 0.801518  |
| 41 | 1 | 0 | 4.186774  | -1.975967 | -0.951976 |
| 42 | 6 | 0 | 6.428953  | 0.068844  | 0.704408  |
| 43 | 1 | 0 | 5.802784  | 2.060306  | 1.309316  |
| 44 | 1 | 0 | 5.770118  | 1.780390  | -0.432451 |
| 45 | 1 | 0 | 6.544691  | -1.921638 | -0.162538 |
| 46 | 1 | 0 | 6.212314  | -0.635646 | -1.326900 |
| 47 | 1 | 0 | 7.486618  | 0.312806  | 0.582925  |
| 48 | 1 | 0 | 6.300254  | -0.331183 | 1.716695  |
| 49 | 7 | 0 | 3.744142  | -0.023822 | -0.384451 |
| 50 | 1 | 0 | 2.124456  | -1.359442 | -0.512925 |
| 51 | 1 | 0 | -1.981941 | 4.238482  | -0.218326 |

### Structure 20a (DMSO)

Energy (Hartrees): = -1112.7936294  
Imaginary frequency -64.85

Standard orientation:

| Center<br>Number | Atomic<br>Number | Atomic<br>Type | Coordinates (Angstroms) |           |           |
|------------------|------------------|----------------|-------------------------|-----------|-----------|
|                  |                  |                | X                       | Y         | Z         |
| 1                | 6                | 0              | -1.567933               | -1.865754 | -0.132117 |
| 2                | 6                | 0              | -2.629664               | -1.053680 | 0.111224  |
| 3                | 6                | 0              | -2.422265               | 0.390226  | 0.049039  |
| 4                | 6                | 0              | -1.110519               | 0.924753  | -0.121928 |
| 5                | 6                | 0              | 0.027925                | 0.021297  | -0.249480 |
| 6                | 6                | 0              | -0.207132               | -1.377505 | -0.315741 |
| 7                | 6                | 0              | -3.994867               | -1.669535 | 0.380219  |
| 8                | 6                | 0              | -1.008051               | 2.337983  | -0.223011 |
| 9                | 6                | 0              | -2.107332               | 3.166282  | -0.125413 |
| 10               | 6                | 0              | -3.391759               | 2.638887  | 0.051611  |
| 11               | 6                | 0              | -3.528076               | 1.268959  | 0.130328  |
| 12               | 6                | 0              | -3.973965               | -2.652146 | 1.558990  |
| 13               | 6                | 0              | -4.560115               | -2.324482 | -0.885902 |
| 14               | 6                | 0              | -4.577418               | 3.560197  | 0.153235  |
| 15               | 6                | 0              | 1.385230                | 0.446759  | -0.224367 |
| 16               | 1                | 0              | 1.626827                | 1.487003  | -0.081489 |
| 17               | 1                | 0              | -4.527872               | 0.872888  | 0.236045  |
| 18               | 1                | 0              | -4.683262               | -0.879119 | 0.670269  |
| 19               | 1                | 0              | -4.994333               | -2.977353 | 1.780025  |
| 20               | 1                | 0              | -3.573219               | -2.174706 | 2.457126  |
| 21               | 1                | 0              | -3.371327               | -3.533204 | 1.339666  |
| 22               | 1                | 0              | -5.557261               | -2.729137 | -0.691024 |
| 23               | 1                | 0              | -4.642606               | -1.596810 | -1.697829 |
| 24               | 1                | 0              | -3.917490               | -3.142384 | -1.218624 |
| 25               | 8                | 0              | -1.663814               | -3.213904 | -0.186833 |
| 26               | 1                | 0              | -0.745190               | -3.507012 | -0.334830 |
| 27               | 8                | 0              | 0.683243                | -2.264980 | -0.478678 |
| 28               | 1                | 0              | -5.511151               | 2.996415  | 0.175449  |
| 29               | 1                | 0              | -4.611872               | 4.250944  | -0.693129 |
| 30               | 1                | 0              | -4.523674               | 4.164309  | 1.063535  |
| 31               | 8                | 0              | 0.224309                | 2.885414  | -0.438385 |
| 32               | 1                | 0              | 0.131584                | 3.843162  | -0.516072 |
| 33               | 7                | 0              | 2.387470                | -0.381397 | -0.347472 |
| 34               | 6                | 0              | 4.092241                | 0.984935  | 0.624137  |
| 35               | 6                | 0              | 4.520638                | -1.272422 | -0.190879 |
| 36               | 6                | 0              | 5.575832                | 1.320287  | 0.520849  |
| 37               | 1                | 0              | 3.842563                | 0.611561  | 1.630059  |
| 38               | 1                | 0              | 3.512559                | 1.887179  | 0.433973  |
| 39               | 6                | 0              | 6.006626                | -0.984553 | -0.334803 |
| 40               | 1                | 0              | 4.309447                | -1.697313 | 0.803152  |
| 41               | 1                | 0              | 4.190381                | -1.985966 | -0.949357 |
| 42               | 6                | 0              | 6.442111                | 0.073519  | 0.675813  |
| 43               | 1                | 0              | 5.812598                | 2.062121  | 1.286777  |
| 44               | 1                | 0              | 5.762695                | 1.781609  | -0.454285 |
| 45               | 1                | 0              | 6.557759                | -1.916673 | -0.192438 |
| 46               | 1                | 0              | 6.203953                | -0.632471 | -1.352407 |
| 47               | 1                | 0              | 7.497049                | 0.322663  | 0.541043  |
| 48               | 1                | 0              | 6.326105                | -0.326698 | 1.689489  |
| 49               | 7                | 0              | 3.746103                | -0.033676 | -0.380801 |
| 50               | 1                | 0              | 2.137026                | -1.373212 | -0.498809 |
| 51               | 1                | 0              | -1.965257               | 4.241429  | -0.208060 |

### Structure 20b $\chi=175.4^\circ$ (vacuum)

Energy (Hartrees): = -1112.7767894  
No imaginary frequencies

Standard orientation:

| Center<br>Number | Atomic<br>Number | Atomic<br>Type | Coordinates (Angstroms) |           |           |
|------------------|------------------|----------------|-------------------------|-----------|-----------|
|                  |                  |                | X                       | Y         | Z         |
| 1                | 6                | 0              | -1.594063               | -1.854347 | -0.199884 |
| 2                | 6                | 0              | -2.648032               | -1.047360 | 0.070305  |
| 3                | 6                | 0              | -2.434365               | 0.401298  | 0.074094  |
| 4                | 6                | 0              | -1.121626               | 0.939441  | -0.018772 |
| 5                | 6                | 0              | 0.023181                | 0.035786  | -0.141080 |
| 6                | 6                | 0              | -0.219679               | -1.367442 | -0.315083 |
| 7                | 6                | 0              | -4.021739               | -1.660968 | 0.288895  |
| 8                | 6                | 0              | -1.011415               | 2.347744  | -0.056212 |
| 9                | 6                | 0              | -2.115135               | 3.175263  | 0.012428  |
| 10               | 6                | 0              | -3.403471               | 2.646376  | 0.097714  |
| 11               | 6                | 0              | -3.540308               | 1.273865  | 0.125065  |
| 12               | 6                | 0              | -4.021094               | -2.737101 | 1.384429  |
| 13               | 6                | 0              | -4.588066               | -2.201853 | -1.030905 |
| 14               | 6                | 0              | -4.596589               | 3.563797  | 0.150351  |
| 15               | 6                | 0              | 1.355731                | 0.437949  | -0.026719 |
| 16               | 1                | 0              | 1.621604                | 1.458690  | 0.203627  |
| 17               | 1                | 0              | -4.542178               | 0.871705  | 0.157625  |
| 18               | 1                | 0              | -4.694138               | -0.882986 | 0.646453  |
| 19               | 1                | 0              | -5.049351               | -3.049069 | 1.585560  |
| 20               | 1                | 0              | -3.598783               | -2.342776 | 2.311462  |
| 21               | 1                | 0              | -3.445411               | -3.611635 | 1.086899  |
| 22               | 1                | 0              | -5.589071               | -2.613214 | -0.876397 |
| 23               | 1                | 0              | -4.651894               | -1.409222 | -1.780257 |
| 24               | 1                | 0              | -3.944858               | -2.993552 | -1.418888 |
| 25               | 8                | 0              | -1.701465               | -3.193596 | -0.339566 |
| 26               | 1                | 0              | -0.785710               | -3.492764 | -0.482708 |
| 27               | 8                | 0              | 0.662938                | -2.237713 | -0.503084 |
| 28               | 1                | 0              | -5.527264               | 2.995958  | 0.159659  |
| 29               | 1                | 0              | -4.615034               | 4.231983  | -0.714262 |
| 30               | 1                | 0              | -4.571728               | 4.186651  | 1.048378  |
| 31               | 8                | 0              | 0.235432                | 2.904124  | -0.178516 |
| 32               | 1                | 0              | 0.137543                | 3.855953  | -0.261998 |
| 33               | 7                | 0              | 2.398927                | -0.366098 | -0.161645 |
| 34               | 6                | 0              | 4.304973                | -0.540681 | 1.193541  |
| 35               | 6                | 0              | 4.484325                | -0.067295 | -1.184110 |
| 36               | 6                | 0              | 5.693380                | 0.034242  | 1.449059  |
| 37               | 1                | 0              | 4.373927                | -1.627695 | 1.013827  |
| 38               | 1                | 0              | 3.648791                | -0.381625 | 2.050615  |
| 39               | 6                | 0              | 5.877747                | 0.521041  | -0.999049 |
| 40               | 1                | 0              | 4.558129                | -1.142507 | -1.424072 |
| 41               | 1                | 0              | 3.955160                | 0.424946  | -2.001286 |
| 42               | 6                | 0              | 6.572781                | -0.109511 | 0.207300  |
| 43               | 1                | 0              | 6.140920                | -0.474206 | 2.306099  |
| 44               | 1                | 0              | 5.590630                | 1.092567  | 1.707576  |
| 45               | 1                | 0              | 6.457351                | 0.363367  | -1.911486 |
| 46               | 1                | 0              | 5.782859                | 1.600640  | -0.847663 |
| 47               | 1                | 0              | 7.549208                | 0.351134  | 0.372402  |
| 48               | 1                | 0              | 6.747274                | -1.173402 | 0.008694  |
| 49               | 7                | 0              | 3.692861                | 0.128986  | 0.037490  |
| 50               | 1                | 0              | 2.225753                | -1.355848 | -0.370668 |
| 51               | 1                | 0              | -1.970694               | 4.252697  | -0.018975 |

### Structure 20b (CHCl<sub>3</sub>)

Energy (Hartrees): = -1112.8050791  
 No imaginary frequencies

Standard orientation:

| Center<br>Number | Atomic<br>Number | Atomic<br>Type | Coordinates (Angstroms) |           |           |
|------------------|------------------|----------------|-------------------------|-----------|-----------|
|                  |                  |                | X                       | Y         | Z         |
| 1                | 6                | 0              | -1.599002               | -1.852983 | -0.202751 |
| 2                | 6                | 0              | -2.653746               | -1.044337 | 0.066078  |
| 3                | 6                | 0              | -2.436845               | 0.404289  | 0.073199  |
| 4                | 6                | 0              | -1.121953               | 0.936694  | -0.042159 |
| 5                | 6                | 0              | 0.019479                | 0.029083  | -0.166313 |
| 6                | 6                | 0              | -0.224203               | -1.371125 | -0.328807 |
| 7                | 6                | 0              | -4.029156               | -1.658891 | 0.279783  |
| 8                | 6                | 0              | -1.006112               | 2.346978  | -0.103695 |
| 9                | 6                | 0              | -2.104902               | 3.179570  | -0.011300 |
| 10               | 6                | 0              | -3.393368               | 2.655847  | 0.119786  |
| 11               | 6                | 0              | -3.538416               | 1.283241  | 0.153407  |
| 12               | 6                | 0              | -4.039210               | -2.712723 | 1.395989  |
| 13               | 6                | 0              | -4.579154               | -2.227708 | -1.034564 |
| 14               | 6                | 0              | -4.577398               | 3.580064  | 0.222252  |
| 15               | 6                | 0              | 1.356087                | 0.435311  | -0.036969 |
| 16               | 1                | 0              | 1.611415                | 1.456165  | 0.206103  |
| 17               | 1                | 0              | -4.542185               | 0.889353  | 0.219076  |
| 18               | 1                | 0              | -4.711789               | -0.878297 | 0.608657  |
| 19               | 1                | 0              | -5.068374               | -3.028827 | 1.588049  |
| 20               | 1                | 0              | -3.636315               | -2.300122 | 2.324522  |
| 21               | 1                | 0              | -3.454171               | -3.591689 | 1.127758  |

|    |   |   |           |           |           |
|----|---|---|-----------|-----------|-----------|
| 22 | 1 | 0 | -5.585111 | -2.629650 | -0.884802 |
| 23 | 1 | 0 | -4.631931 | -1.452332 | -1.803335 |
| 24 | 1 | 0 | -3.939305 | -3.032815 | -1.401417 |
| 25 | 8 | 0 | -1.711203 | -3.194380 | -0.334798 |
| 26 | 1 | 0 | -0.796982 | -3.501525 | -0.478419 |
| 27 | 8 | 0 | 0.657006  | -2.246464 | -0.516749 |
| 28 | 1 | 0 | -5.514536 | 3.022067  | 0.203746  |
| 29 | 1 | 0 | -4.589700 | 4.297107  | -0.602555 |
| 30 | 1 | 0 | -4.543460 | 4.153256  | 1.153140  |
| 31 | 8 | 0 | 0.235721  | 2.890049  | -0.274101 |
| 32 | 1 | 0 | 0.150592  | 3.845666  | -0.371269 |
| 33 | 7 | 0 | 2.401775  | -0.356439 | -0.162618 |
| 34 | 6 | 0 | 4.293324  | -0.532539 | 1.209670  |
| 35 | 6 | 0 | 4.491971  | -0.066176 | -1.170989 |
| 36 | 6 | 0 | 5.686238  | 0.027621  | 1.470411  |
| 37 | 1 | 0 | 4.348904  | -1.618459 | 1.026163  |
| 38 | 1 | 0 | 3.636171  | -0.363972 | 2.064357  |
| 39 | 6 | 0 | 5.890269  | 0.506581  | -0.979040 |
| 40 | 1 | 0 | 4.552896  | -1.143313 | -1.401065 |
| 41 | 1 | 0 | 3.974615  | 0.429412  | -1.993992 |
| 42 | 6 | 0 | 6.571692  | -0.125140 | 0.234238  |
| 43 | 1 | 0 | 6.121426  | -0.488271 | 2.329559  |
| 44 | 1 | 0 | 5.595471  | 1.087039  | 1.731117  |
| 45 | 1 | 0 | 6.470711  | 0.333597  | -1.888355 |
| 46 | 1 | 0 | 5.810179  | 1.588996  | -0.836696 |
| 47 | 1 | 0 | 7.549092  | 0.331890  | 0.404895  |
| 48 | 1 | 0 | 6.741131  | -1.190498 | 0.039677  |
| 49 | 7 | 0 | 3.693663  | 0.145085  | 0.047615  |
| 50 | 1 | 0 | 2.252449  | -1.346120 | -0.383874 |
| 51 | 1 | 0 | -1.955008 | 4.255222  | -0.060185 |

### Structure 20b (DMSO)

Energy (Hartrees): = -1112.8004855  
No imaginary frequencies

Standard orientation:

| Center<br>Number | Atomic<br>Number | Atomic<br>Type | Coordinates (Angstroms) |           |           |
|------------------|------------------|----------------|-------------------------|-----------|-----------|
|                  |                  |                | X                       | Y         | Z         |
| 1                | 6                | 0              | -1.604942               | -1.856206 | -0.191121 |
| 2                | 6                | 0              | -2.659336               | -1.043554 | 0.067788  |
| 3                | 6                | 0              | -2.436834               | 0.404434  | 0.071092  |
| 4                | 6                | 0              | -1.118590               | 0.932870  | -0.033526 |
| 5                | 6                | 0              | 0.021006                | 0.020942  | -0.149411 |
| 6                | 6                | 0              | -0.226468               | -1.378653 | -0.305674 |
| 7                | 6                | 0              | -4.040071               | -1.648418 | 0.273203  |
| 8                | 6                | 0              | -0.999328               | 2.344221  | -0.089001 |
| 9                | 6                | 0              | -2.096876               | 3.180038  | -0.006572 |
| 10               | 6                | 0              | -3.388360               | 2.658867  | 0.108203  |
| 11               | 6                | 0              | -3.537825               | 1.286174  | 0.139480  |
| 12               | 6                | 0              | -4.063945               | -2.714685 | 1.376707  |
| 13               | 6                | 0              | -4.592642               | -2.196719 | -1.048028 |
| 14               | 6                | 0              | -4.571396               | 3.585131  | 0.194404  |
| 15               | 6                | 0              | 1.361197                | 0.425334  | -0.026678 |
| 16               | 1                | 0              | 1.618376                | 1.449073  | 0.200816  |
| 17               | 1                | 0              | -4.543931               | 0.896056  | 0.194797  |
| 18               | 1                | 0              | -4.716419               | -0.865561 | 0.609249  |
| 19               | 1                | 0              | -5.098062               | -3.014980 | 1.567025  |
| 20               | 1                | 0              | -3.653787               | -2.319192 | 2.309836  |
| 21               | 1                | 0              | -3.493885               | -3.600294 | 1.098070  |
| 22               | 1                | 0              | -5.602454               | -2.590939 | -0.904429 |
| 23               | 1                | 0              | -4.638617               | -1.411691 | -1.807621 |
| 24               | 1                | 0              | -3.959785               | -3.003434 | -1.424369 |
| 25               | 8                | 0              | -1.715691               | -3.197354 | -0.321620 |
| 26               | 1                | 0              | -0.797512               | -3.497954 | -0.454719 |
| 27               | 8                | 0              | 0.651412                | -2.259100 | -0.482066 |
| 28               | 1                | 0              | -5.508547               | 3.027152  | 0.174435  |
| 29               | 1                | 0              | -4.575045               | 4.295696  | -0.636031 |
| 30               | 1                | 0              | -4.542121               | 4.167573  | 1.119659  |
| 31               | 8                | 0              | 0.243617                | 2.885429  | -0.244093 |
| 32               | 1                | 0              | 0.161110                | 3.845409  | -0.304086 |
| 33               | 7                | 0              | 2.405430                | -0.366215 | -0.142060 |
| 34               | 6                | 0              | 4.310552                | -0.515274 | 1.214027  |
| 35               | 6                | 0              | 4.483323                | -0.088226 | -1.177197 |
| 36               | 6                | 0              | 5.704963                | 0.051322  | 1.449308  |
| 37               | 1                | 0              | 4.366227                | -1.602895 | 1.044540  |
| 38               | 1                | 0              | 3.663023                | -0.332709 | 2.073384  |
| 39               | 6                | 0              | 5.882756                | 0.488307  | -1.008780 |
| 40               | 1                | 0              | 4.541447                | -1.168956 | -1.387037 |
| 41               | 1                | 0              | 3.957669                | 0.394581  | -2.002800 |
| 42               | 6                | 0              | 6.576834                | -0.123434 | 0.206947  |
| 43               | 1                | 0              | 6.149099                | -0.449174 | 2.312871  |
| 44               | 1                | 0              | 5.616900                | 1.115438  | 1.692026  |
| 45               | 1                | 0              | 6.452862                | 0.300427  | -1.921631 |

|    |   |   |           |           |           |
|----|---|---|-----------|-----------|-----------|
| 46 | 1 | 0 | 5.804978  | 1.573286  | -0.883665 |
| 47 | 1 | 0 | 7.556597  | 0.335275  | 0.359369  |
| 48 | 1 | 0 | 6.741127  | -1.192289 | 0.028141  |
| 49 | 7 | 0 | 3.697502  | 0.144377  | 0.047205  |
| 50 | 1 | 0 | 2.265259  | -1.359453 | -0.350874 |
| 51 | 1 | 0 | -1.943846 | 4.255811  | -0.051754 |

-----  
**Structure 20b  $\chi = 38.6^\circ$  (vacuum)**

Energy (Hartrees): = -1112.77402  
 No imaginary frequencies

Standard orientation:

| Center<br>Number | Atomic<br>Number | Atomic<br>Type | Coordinates (Angstroms) |           |           |
|------------------|------------------|----------------|-------------------------|-----------|-----------|
|                  |                  |                | X                       | Y         | Z         |
| 1                | 6                | 0              | -1.575016               | -1.841148 | -0.361239 |
| 2                | 6                | 0              | -2.586087               | -1.059152 | 0.091224  |
| 3                | 6                | 0              | -2.401061               | 0.396725  | 0.095569  |
| 4                | 6                | 0              | -1.131822               | 0.955228  | -0.201460 |
| 5                | 6                | 0              | 0.012519                | 0.069772  | -0.427789 |
| 6                | 6                | 0              | -0.227614               | -1.334231 | -0.632114 |
| 7                | 6                | 0              | -3.906935               | -1.693655 | 0.491184  |
| 8                | 6                | 0              | -1.046818               | 2.355159  | -0.338378 |
| 9                | 6                | 0              | -2.122316               | 3.180546  | -0.077869 |
| 10               | 6                | 0              | -3.355145               | 2.640499  | 0.286438  |
| 11               | 6                | 0              | -3.482338               | 1.262833  | 0.339501  |
| 12               | 6                | 0              | -3.743269               | -2.814105 | 1.528095  |
| 13               | 6                | 0              | -4.667868               | -2.182263 | -0.748548 |
| 14               | 6                | 0              | -4.520678               | 3.546235  | 0.586438  |
| 15               | 6                | 0              | 1.330027                | 0.466438  | -0.229193 |
| 16               | 1                | 0              | 1.571047                | 1.458525  | 0.137410  |
| 17               | 1                | 0              | -4.461604               | 0.858184  | 0.552089  |
| 18               | 1                | 0              | -4.515262               | -0.932142 | 0.976512  |
| 19               | 1                | 0              | -4.729543               | -3.128273 | 1.879003  |
| 20               | 1                | 0              | -3.171898               | -2.463113 | 2.390330  |
| 21               | 1                | 0              | -3.235438               | -3.678870 | 1.105769  |
| 22               | 1                | 0              | -5.638890               | -2.593569 | -0.460566 |
| 23               | 1                | 0              | -4.834992               | -1.362843 | -1.451572 |
| 24               | 1                | 0              | -4.098751               | -2.963188 | -1.256389 |
| 25               | 8                | 0              | -1.689542               | -3.177889 | -0.526926 |
| 26               | 1                | 0              | -0.796804               | -3.470813 | -0.778729 |
| 27               | 8                | 0              | 0.649271                | -2.175409 | -0.921484 |
| 28               | 1                | 0              | -5.455330               | 2.985701  | 0.626615  |
| 29               | 1                | 0              | -4.620495               | 4.323935  | -0.173846 |
| 30               | 1                | 0              | -4.384662               | 4.043513  | 1.550647  |
| 31               | 8                | 0              | 0.112422                | 2.973434  | -0.747019 |
| 32               | 1                | 0              | 0.519088                | 2.428278  | -1.429760 |
| 33               | 7                | 0              | 2.398258                | -0.303184 | -0.404259 |
| 34               | 6                | 0              | 4.062911                | -0.542355 | 1.239939  |
| 35               | 6                | 0              | 4.627520                | -0.038008 | -1.070366 |
| 36               | 6                | 0              | 5.397746                | 0.008954  | 1.725325  |
| 37               | 1                | 0              | 4.145530                | -1.627088 | 1.053944  |
| 38               | 1                | 0              | 3.279642                | -0.386067 | 1.983477  |
| 39               | 6                | 0              | 5.981371                | 0.524963  | -0.652995 |
| 40               | 1                | 0              | 4.725513                | -1.111204 | -1.311322 |
| 41               | 1                | 0              | 4.244964                | 0.472894  | -1.955091 |
| 42               | 6                | 0              | 6.463907                | -0.132567 | 0.639603  |
| 43               | 1                | 0              | 5.693198                | -0.517898 | 2.635415  |
| 44               | 1                | 0              | 5.267159                | 1.065111  | 1.979694  |
| 45               | 1                | 0              | 6.699125                | 0.370203  | -1.461700 |
| 46               | 1                | 0              | 5.878805                | 1.603888  | -0.502161 |
| 47               | 1                | 0              | 7.406832                | 0.310491  | 0.967012  |
| 48               | 1                | 0              | 6.653718                | -1.196502 | 0.455557  |
| 49               | 7                | 0              | 3.653503                | 0.154345  | 0.010346  |
| 50               | 1                | 0              | 2.250331                | -1.276437 | -0.690786 |
| 51               | 1                | 0              | -1.985016               | 4.248877  | -0.200906 |

-----  
**Structure 20b  $\chi = 91.0^\circ$  (vacuum)**

Energy (Hartrees): = -1112.772129  
 Imaginary frequency -314.45

Standard orientation:

| Center<br>Number | Atomic<br>Number | Atomic<br>Type | Coordinates (Angstroms) |           |           |
|------------------|------------------|----------------|-------------------------|-----------|-----------|
|                  |                  |                | X                       | Y         | Z         |
| 1                | 6                | 0              | -1.573670               | -1.847215 | -0.284548 |
| 2                | 6                | 0              | -2.614796               | -1.055239 | 0.070452  |
| 3                | 6                | 0              | -2.420434               | 0.397200  | 0.070529  |
| 4                | 6                | 0              | -1.127843               | 0.952686  | -0.140810 |
| 5                | 6                | 0              | 0.016894                | 0.062079  | -0.331966 |
| 6                | 6                | 0              | -0.217739               | -1.342829 | -0.505438 |

|    |   |   |           |           |           |
|----|---|---|-----------|-----------|-----------|
| 7  | 6 | 0 | -3.956912 | -1.691676 | 0.392657  |
| 8  | 6 | 0 | -1.035674 | 2.357910  | -0.217595 |
| 9  | 6 | 0 | -2.127505 | 3.180158  | -0.036197 |
| 10 | 6 | 0 | -3.393279 | 2.642135  | 0.199718  |
| 11 | 6 | 0 | -3.516545 | 1.265721  | 0.233611  |
| 12 | 6 | 0 | -3.855123 | -2.726436 | 1.522858  |
| 13 | 6 | 0 | -4.592586 | -2.293746 | -0.867717 |
| 14 | 6 | 0 | -4.580037 | 3.546360  | 0.405909  |
| 15 | 6 | 0 | 1.342281  | 0.473744  | -0.193003 |
| 16 | 1 | 0 | 1.586669  | 1.484884  | 0.102906  |
| 17 | 1 | 0 | -4.507603 | 0.858159  | 0.373846  |
| 18 | 1 | 0 | -4.628100 | -0.918788 | 0.762303  |
| 19 | 1 | 0 | -4.857098 | -3.068192 | 1.794913  |
| 20 | 1 | 0 | -3.394494 | -2.284743 | 2.409249  |
| 21 | 1 | 0 | -3.265591 | -3.590009 | 1.219953  |
| 22 | 1 | 0 | -5.574358 | -2.713801 | -0.633835 |
| 23 | 1 | 0 | -4.719431 | -1.531375 | -1.640059 |
| 24 | 1 | 0 | -3.961137 | -3.089198 | -1.266069 |
| 25 | 8 | 0 | -1.673611 | -3.189034 | -0.412521 |
| 26 | 1 | 0 | -0.767890 | -3.478783 | -0.621343 |
| 27 | 8 | 0 | 0.664326  | -2.196359 | -0.754949 |
| 28 | 1 | 0 | -5.509848 | 2.976898  | 0.426427  |
| 29 | 1 | 0 | -4.652614 | 4.288942  | -0.392044 |
| 30 | 1 | 0 | -4.495270 | 4.087386  | 1.352115  |
| 31 | 8 | 0 | 0.185222  | 2.972514  | -0.470680 |
| 32 | 1 | 0 | 0.274818  | 3.081200  | -1.422642 |
| 33 | 7 | 0 | 2.397631  | -0.308313 | -0.364601 |
| 34 | 6 | 0 | 4.115096  | -0.498811 | 1.222721  |
| 35 | 6 | 0 | 4.603411  | -0.085539 | -1.120983 |
| 36 | 6 | 0 | 5.471001  | 0.053951  | 1.643236  |
| 37 | 1 | 0 | 4.181336  | -1.590275 | 1.072139  |
| 38 | 1 | 0 | 3.358841  | -0.309141 | 1.986151  |
| 39 | 6 | 0 | 5.977959  | 0.474840  | -0.771279 |
| 40 | 1 | 0 | 4.680611  | -1.167959 | -1.325886 |
| 41 | 1 | 0 | 4.195705  | 0.397323  | -2.010199 |
| 42 | 6 | 0 | 6.497779  | -0.140111 | 0.527895  |
| 43 | 1 | 0 | 5.792072  | -0.442379 | 2.561804  |
| 44 | 1 | 0 | 5.360158  | 1.120252  | 1.862265  |
| 45 | 1 | 0 | 6.665119  | 0.280593  | -1.597939 |
| 46 | 1 | 0 | 5.893370  | 1.559934  | -0.657598 |
| 47 | 1 | 0 | 7.456051  | 0.304052  | 0.805523  |
| 48 | 1 | 0 | 6.670230  | -1.212230 | 0.377241  |
| 49 | 7 | 0 | 3.670186  | 0.158392  | -0.015429 |
| 50 | 1 | 0 | 2.234475  | -1.293576 | -0.602300 |
| 51 | 1 | 0 | -1.971892 | 4.252202  | -0.091817 |

-----  
**Structure 20b  $\chi = 269.0^\circ$  (vacuum)**

Energy (Hartrees): = -1112.772129  
Imaginary frequency -314.41

Standard orientation:

| Center<br>Number | Atomic<br>Number | Atomic<br>Type | Coordinates (Angstroms) |           |           |
|------------------|------------------|----------------|-------------------------|-----------|-----------|
|                  |                  |                | X                       | Y         | Z         |
| 1                | 6                | 0              | 1.573659                | -1.847200 | -0.284579 |
| 2                | 6                | 0              | 2.614804                | -1.055252 | 0.070425  |
| 3                | 6                | 0              | 2.420461                | 0.397188  | 0.070558  |
| 4                | 6                | 0              | 1.127867                | 0.952696  | -0.140697 |
| 5                | 6                | 0              | -0.016888               | 0.062110  | -0.331839 |
| 6                | 6                | 0              | 0.217726                | -1.342790 | -0.505406 |
| 7                | 6                | 0              | 3.956919                | -1.691718 | 0.392577  |
| 8                | 6                | 0              | 1.035710                | 2.357924  | -0.217439 |
| 9                | 6                | 0              | 2.127562                | 3.180152  | -0.036089 |
| 10               | 6                | 0              | 3.393344                | 2.642106  | 0.199739  |
| 11               | 6                | 0              | 3.516594                | 1.265691  | 0.233603  |
| 12               | 6                | 0              | 4.592560                | -2.293760 | -0.867826 |
| 13               | 6                | 0              | 3.855135                | -2.726515 | 1.522746  |
| 14               | 6                | 0              | 4.580130                | 3.546316  | 0.405835  |
| 15               | 6                | 0              | -1.342266               | 0.473780  | -0.192796 |
| 16               | 1                | 0              | -1.586637               | 1.484896  | 0.103206  |
| 17               | 1                | 0              | 4.507653                | 0.858112  | 0.373774  |
| 18               | 1                | 0              | 4.628124                | -0.918852 | 0.762237  |
| 19               | 1                | 0              | 5.574333                | -2.713828 | -0.633977 |
| 20               | 1                | 0              | 4.719394                | -1.531372 | -1.640154 |
| 21               | 1                | 0              | 3.961095                | -3.089199 | -1.266181 |
| 22               | 1                | 0              | 4.857109                | -3.068306 | 1.794761  |
| 23               | 1                | 0              | 3.394539                | -2.284842 | 2.409164  |
| 24               | 1                | 0              | 3.265572                | -3.590062 | 1.219824  |
| 25               | 8                | 0              | 1.673581                | -3.189015 | -0.412616 |
| 26               | 1                | 0              | 0.767851                | -3.478744 | -0.621428 |
| 27               | 8                | 0              | -0.664353               | -2.196298 | -0.754939 |
| 28               | 1                | 0              | 5.509905                | 2.976804  | 0.426602  |
| 29               | 1                | 0              | 4.495291                | 4.087597  | 1.351887  |
| 30               | 1                | 0              | 4.652841                | 4.288683  | -0.392308 |

|    |   |   |           |           |           |
|----|---|---|-----------|-----------|-----------|
| 31 | 8 | 0 | -0.185195 | 2.972541  | -0.470439 |
| 32 | 1 | 0 | -0.274817 | 3.081306  | -1.422388 |
| 33 | 7 | 0 | -2.397623 | -0.308256 | -0.364440 |
| 34 | 6 | 0 | -4.603292 | -0.085099 | -1.121023 |
| 35 | 6 | 0 | -4.115279 | -0.499168 | 1.222603  |
| 36 | 6 | 0 | -5.977858 | 0.475222  | -0.771304 |
| 37 | 1 | 0 | -4.680511 | -1.167447 | -1.326297 |
| 38 | 1 | 0 | -4.195454 | 0.398044  | -2.010025 |
| 39 | 6 | 0 | -5.471226 | 0.053480  | 1.643133  |
| 40 | 1 | 0 | -4.181527 | -1.590581 | 1.071649  |
| 41 | 1 | 0 | -3.359116 | -0.309772 | 1.986193  |
| 42 | 6 | 0 | -6.497867 | -0.140158 | 0.527590  |
| 43 | 1 | 0 | -6.664922 | 0.281290  | -1.598119 |
| 44 | 1 | 0 | -5.893237 | 1.560273  | -0.657236 |
| 45 | 1 | 0 | -5.792428 | -0.443175 | 2.561480  |
| 46 | 1 | 0 | -5.360389 | 1.119699  | 1.862562  |
| 47 | 1 | 0 | -7.456160 | 0.303941  | 0.805251  |
| 48 | 1 | 0 | -6.670338 | -1.212218 | 0.376541  |
| 49 | 7 | 0 | -3.670189 | 0.158425  | -0.015273 |
| 50 | 1 | 0 | -2.234478 | -1.293488 | -0.602276 |
| 51 | 1 | 0 | 1.971963  | 4.252200  | -0.091676 |

-----

**Structure 20b  $\chi = 321.4^\circ$  (vacuum)**

Energy (Hartrees): = -1112.77402  
 No imaginary frequencies

Standard orientation:

| Center<br>Number | Atomic<br>Number | Atomic<br>Type | Coordinates (Angstroms) |           |           |
|------------------|------------------|----------------|-------------------------|-----------|-----------|
|                  |                  |                | X                       | Y         | Z         |
| 1                | 6                | 0              | 1.575026                | -1.841128 | -0.361640 |
| 2                | 6                | 0              | 2.585912                | -1.059247 | 0.091369  |
| 3                | 6                | 0              | 2.400948                | 0.396646  | 0.095665  |
| 4                | 6                | 0              | 1.131760                | 0.955241  | -0.201462 |
| 5                | 6                | 0              | -0.012602               | 0.069798  | -0.427954 |
| 6                | 6                | 0              | 0.227623                | -1.334170 | -0.632632 |
| 7                | 6                | 0              | 3.906686                | -1.693611 | 0.491807  |
| 8                | 6                | 0              | 1.046842                | 2.355182  | -0.338250 |
| 9                | 6                | 0              | 2.122518                | 3.180449  | -0.077974 |
| 10               | 6                | 0              | 3.355265                | 2.640327  | 0.286345  |
| 11               | 6                | 0              | 3.482291                | 1.262619  | 0.339541  |
| 12               | 6                | 0              | 4.668520                | -2.181237 | -0.747754 |
| 13               | 6                | 0              | 3.742876                | -2.814710 | 1.527990  |
| 14               | 6                | 0              | 4.520934                | 3.545832  | 0.586524  |
| 15               | 6                | 0              | -1.330115               | 0.466405  | -0.229278 |
| 16               | 1                | 0              | -1.571160               | 1.458406  | 0.137500  |
| 17               | 1                | 0              | 4.461525                | 0.857873  | 0.552145  |
| 18               | 1                | 0              | 4.514380                | -0.932120 | 0.977982  |
| 19               | 1                | 0              | 5.639495                | -2.592433 | -0.459452 |
| 20               | 1                | 0              | 4.835799                | -1.361369 | -1.450219 |
| 21               | 1                | 0              | 4.099917                | -2.962046 | -1.256369 |
| 22               | 1                | 0              | 4.729068                | -3.128365 | 1.879588  |
| 23               | 1                | 0              | 3.170519                | -2.464575 | 2.389920  |
| 24               | 1                | 0              | 3.236014                | -3.679613 | 1.104801  |
| 25               | 8                | 0              | 1.689631                | -3.177810 | -0.527777 |
| 26               | 1                | 0              | 0.796963                | -3.470691 | -0.779864 |
| 27               | 8                | 0              | -0.649158               | -2.175326 | -0.922230 |
| 28               | 1                | 0              | 5.455950                | 2.985658  | 0.623132  |
| 29               | 1                | 0              | 4.386667                | 4.040161  | 1.552509  |
| 30               | 1                | 0              | 4.618750                | 4.325821  | -0.171651 |
| 31               | 8                | 0              | -0.112408               | 2.973586  | -0.746702 |
| 32               | 1                | 0              | -0.519121               | 2.428485  | -1.429474 |
| 33               | 7                | 0              | -2.398400               | -0.303156 | -0.404472 |
| 34               | 6                | 0              | -4.627717               | -0.037589 | -1.070276 |
| 35               | 6                | 0              | -4.062907               | -0.542719 | 1.239800  |
| 36               | 6                | 0              | -5.981469               | 0.525375  | -0.652586 |
| 37               | 1                | 0              | -4.725843               | -1.110702 | -1.311563 |
| 38               | 1                | 0              | -4.245200               | 0.473550  | -1.954881 |
| 39               | 6                | 0              | -5.397656               | 0.008518  | 1.725511  |
| 40               | 1                | 0              | -4.145620               | -1.627394 | 1.053484  |
| 41               | 1                | 0              | -3.279556               | -0.386719 | 1.983313  |
| 42               | 6                | 0              | -6.463937               | -0.132538 | 0.639848  |
| 43               | 1                | 0              | -6.699323               | 0.370948  | -1.461266 |
| 44               | 1                | 0              | -5.878783               | 1.604240  | -0.501405 |
| 45               | 1                | 0              | -5.693055               | -0.518631 | 2.635447  |
| 46               | 1                | 0              | -5.266966               | 1.064575  | 1.980237  |
| 47               | 1                | 0              | -7.406790               | 0.310495  | 0.967501  |
| 48               | 1                | 0              | -6.653866               | -1.196394 | 0.455467  |
| 49               | 7                | 0              | -3.653572               | 0.154323  | 0.010391  |
| 50               | 1                | 0              | -2.250584               | -1.276369 | -0.691116 |
| 51               | 1                | 0              | 1.985315                | 4.248787  | -0.201079 |

-----

**Structure 20c (vacuum)**

Energy (Hartrees): = -1112.7680766  
 Imaginary frequency -59.34

Standard orientation:

| Center Number | Atomic Number | Atomic Type | Coordinates (Angstroms) |           |           |
|---------------|---------------|-------------|-------------------------|-----------|-----------|
|               |               |             | X                       | Y         | Z         |
| 1             | 6             | 0           | 1.597878                | -1.863306 | 0.090947  |
| 2             | 6             | 0           | 2.662250                | -1.033593 | -0.055513 |
| 3             | 6             | 0           | 2.425133                | 0.406419  | -0.050774 |
| 4             | 6             | 0           | 1.096964                | 0.921052  | -0.049819 |
| 5             | 6             | 0           | -0.030539               | -0.001755 | -0.029902 |
| 6             | 6             | 0           | 0.219433                | -1.396247 | 0.104347  |
| 7             | 6             | 0           | 4.058421                | -1.626451 | -0.160935 |
| 8             | 6             | 0           | 0.962105                | 2.330013  | -0.011390 |
| 9             | 6             | 0           | 2.050989                | 3.175399  | 0.011165  |
| 10            | 6             | 0           | 3.353573                | 2.669136  | 0.020218  |
| 11            | 6             | 0           | 3.516134                | 1.301792  | -0.009123 |
| 12            | 6             | 0           | 4.177688                | -2.656515 | -1.293847 |
| 13            | 6             | 0           | 4.502217                | -2.216934 | 1.184108  |
| 14            | 6             | 0           | 4.529354                | 3.608749  | 0.067749  |
| 15            | 6             | 0           | -1.380247               | 0.390218  | -0.184836 |
| 16            | 1             | 0           | -1.624975               | 1.418921  | -0.388259 |
| 17            | 1             | 0           | 4.524646                | 0.917556  | 0.029308  |
| 18            | 1             | 0           | 4.753908                | -0.829418 | -0.417091 |
| 19            | 1             | 0           | 5.225467                | -2.944269 | -1.414053 |
| 20            | 1             | 0           | 3.830121                | -2.232763 | -2.238722 |
| 21            | 1             | 0           | 3.595174                | -3.551148 | -1.081645 |
| 22            | 1             | 0           | 5.521241                | -2.606110 | 1.110967  |
| 23            | 1             | 0           | 4.478324                | -1.457055 | 1.968954  |
| 24            | 1             | 0           | 3.840125                | -3.034545 | 1.474395  |
| 25            | 8             | 0           | 1.715336                | -3.205401 | 0.197254  |
| 26            | 1             | 0           | 0.795769                | -3.521460 | 0.251123  |
| 27            | 8             | 0           | -0.672717               | -2.292070 | 0.192026  |
| 28            | 1             | 0           | 5.470069                | 3.057876  | 0.084462  |
| 29            | 1             | 0           | 4.491247                | 4.241520  | 0.958294  |
| 30            | 1             | 0           | 4.538646                | 4.267295  | -0.804703 |
| 31            | 8             | 0           | -0.301662               | 2.871176  | 0.016802  |
| 32            | 1             | 0           | -0.217895               | 3.823512  | 0.109657  |
| 33            | 7             | 0           | -2.367953               | -0.468195 | -0.107982 |
| 34            | 6             | 0           | -4.500697               | -1.305395 | 0.195418  |
| 35            | 6             | 0           | -4.154833               | 1.097414  | 0.113514  |
| 36            | 6             | 0           | -5.970817               | -1.153453 | -0.164058 |
| 37            | 1             | 0           | -4.373720               | -1.318587 | 1.290749  |
| 38            | 1             | 0           | -4.102962               | -2.241652 | -0.202964 |
| 39            | 6             | 0           | -5.626043               | 1.316740  | -0.226697 |
| 40            | 1             | 0           | -3.987874               | 1.155744  | 1.202582  |
| 41            | 1             | 0           | -3.563340               | 1.879768  | -0.361874 |
| 42            | 6             | 0           | -6.498267               | 0.192796  | 0.328078  |
| 43            | 1             | 0           | -6.531507               | -1.980494 | 0.276997  |
| 44            | 1             | 0           | -6.077079               | -1.220441 | -1.250920 |
| 45            | 1             | 0           | -5.936403               | 2.286345  | 0.169008  |
| 46            | 1             | 0           | -5.727527               | 1.356464  | -1.315433 |
| 47            | 1             | 0           | -7.539413               | 0.333337  | 0.030344  |
| 48            | 1             | 0           | -6.467954               | 0.214970  | 1.423530  |
| 49            | 7             | 0           | -3.719204               | -0.208295 | -0.390905 |
| 50            | 1             | 0           | -2.062215               | -1.456160 | 0.028506  |
| 51            | 1             | 0           | 1.886405                | 4.250121  | 0.038437  |

### Structure 20c (CHCl<sub>3</sub>)

Energy (Hartrees): = -1112.797514  
 Imaginary frequency -68.10

Standard orientation:

| Center Number | Atomic Number | Atomic Type | Coordinates (Angstroms) |           |           |
|---------------|---------------|-------------|-------------------------|-----------|-----------|
|               |               |             | X                       | Y         | Z         |
| 1             | 6             | 0           | -1.613540               | -1.861778 | -0.107387 |
| 2             | 6             | 0           | -2.673292               | -1.027677 | 0.053434  |
| 3             | 6             | 0           | -2.425857               | 0.410968  | 0.055875  |
| 4             | 6             | 0           | -1.092454               | 0.914211  | 0.051314  |
| 5             | 6             | 0           | 0.029457                | -0.017150 | 0.024681  |
| 6             | 6             | 0           | -0.230430               | -1.406165 | -0.124073 |
| 7             | 6             | 0           | -4.074102               | -1.610244 | 0.172153  |
| 8             | 6             | 0           | -0.944896               | 2.325225  | 0.006856  |
| 9             | 6             | 0           | -2.028545               | 3.178901  | -0.009596 |
| 10            | 6             | 0           | -3.336390               | 2.681998  | -0.007969 |
| 11            | 6             | 0           | -3.512220               | 1.315258  | 0.023272  |
| 12            | 6             | 0           | -4.189440               | -2.646112 | 1.299420  |
| 13            | 6             | 0           | -4.545966               | -2.187814 | -1.168459 |
| 14            | 6             | 0           | -4.503108               | 3.631808  | -0.062915 |
| 15            | 6             | 0           | 1.384115                | 0.369732  | 0.200696  |
| 16            | 1             | 0           | 1.629006                | 1.392419  | 0.435009  |

|    |   |   |           |           |           |
|----|---|---|-----------|-----------|-----------|
| 17 | 1 | 0 | -4.525214 | 0.941118  | -0.007450 |
| 18 | 1 | 0 | -4.758832 | -0.808801 | 0.442084  |
| 19 | 1 | 0 | -5.239979 | -2.915394 | 1.440372  |
| 20 | 1 | 0 | -3.817436 | -2.237628 | 2.242567  |
| 21 | 1 | 0 | -3.629664 | -3.552541 | 1.073030  |
| 22 | 1 | 0 | -5.569670 | -2.563165 | -1.082496 |
| 23 | 1 | 0 | -4.527307 | -1.425385 | -1.951623 |
| 24 | 1 | 0 | -3.903474 | -3.014867 | -1.478387 |
| 25 | 8 | 0 | -1.741778 | -3.203710 | -0.221825 |
| 26 | 1 | 0 | -0.824396 | -3.529390 | -0.279952 |
| 27 | 8 | 0 | 0.653211  | -2.310547 | -0.223218 |
| 28 | 1 | 0 | -5.450739 | 3.095292  | 0.001267  |
| 29 | 1 | 0 | -4.498817 | 4.202494  | -0.995834 |
| 30 | 1 | 0 | -4.463350 | 4.351669  | 0.758983  |
| 31 | 8 | 0 | 0.319295  | 2.847746  | -0.036190 |
| 32 | 1 | 0 | 0.257680  | 3.806614  | -0.118117 |
| 33 | 7 | 0 | 2.375253  | -0.478756 | 0.116778  |
| 34 | 6 | 0 | 4.512288  | -1.317326 | -0.165131 |
| 35 | 6 | 0 | 4.157721  | 1.091154  | -0.128095 |
| 36 | 6 | 0 | 5.981891  | -1.150653 | 0.187451  |
| 37 | 1 | 0 | 4.383086  | -1.347058 | -1.258801 |
| 38 | 1 | 0 | 4.119986  | -2.247545 | 0.252451  |
| 39 | 6 | 0 | 5.628169  | 1.318783  | 0.206411  |
| 40 | 1 | 0 | 3.991454  | 1.121619  | -1.217047 |
| 41 | 1 | 0 | 3.566104  | 1.881879  | 0.332330  |
| 42 | 6 | 0 | 6.502887  | 0.188325  | -0.329669 |
| 43 | 1 | 0 | 6.541510  | -1.984059 | -0.243145 |
| 44 | 1 | 0 | 6.094630  | -1.199832 | 1.275003  |
| 45 | 1 | 0 | 5.931651  | 2.282364  | -0.209161 |
| 46 | 1 | 0 | 5.733140  | 1.380661  | 1.294213  |
| 47 | 1 | 0 | 7.543641  | 0.337469  | -0.034026 |
| 48 | 1 | 0 | 6.470490  | 0.190796  | -1.425326 |
| 49 | 7 | 0 | 3.724049  | -0.210256 | 0.401890  |
| 50 | 1 | 0 | 2.101068  | -1.463562 | -0.052340 |
| 51 | 1 | 0 | -1.853231 | 4.251329  | -0.044025 |

### Structure 20c (DMSO)

Energy (Hartrees): = -1112.7934899  
 Imaginary frequency -68.49

Standard orientation:

| Center Number | Atomic Number | Atomic Type | Coordinates (Angstroms) |           |           |
|---------------|---------------|-------------|-------------------------|-----------|-----------|
|               |               |             | X                       | Y         | Z         |
| 1             | 6             | 0           | -1.620222               | -1.865449 | -0.090339 |
| 2             | 6             | 0           | -2.678275               | -1.027945 | 0.065921  |
| 3             | 6             | 0           | -2.424734               | 0.410091  | 0.066181  |
| 4             | 6             | 0           | -1.088702               | 0.909060  | 0.061654  |
| 5             | 6             | 0           | 0.031196                | -0.026060 | 0.037779  |
| 6             | 6             | 0           | -0.234050               | -1.414140 | -0.104800 |
| 7             | 6             | 0           | -4.085145               | -1.598753 | 0.164105  |
| 8             | 6             | 0           | -0.937972               | 2.320873  | 0.014302  |
| 9             | 6             | 0           | -2.019447               | 3.177774  | -0.003465 |
| 10            | 6             | 0           | -3.328907               | 2.684207  | -0.001457 |
| 11            | 6             | 0           | -3.509429               | 1.317571  | 0.031514  |
| 12            | 6             | 0           | -4.223830               | -2.673343 | 1.251135  |
| 13            | 6             | 0           | -4.555151               | -2.121924 | -1.198701 |
| 14            | 6             | 0           | -4.492328               | 3.637179  | -0.056355 |
| 15            | 6             | 0           | 1.390039                | 0.359840  | 0.205424  |
| 16            | 1             | 0           | 1.638602                | 1.383192  | 0.432967  |
| 17            | 1             | 0           | -4.524305               | 0.947763  | 0.001707  |
| 18            | 1             | 0           | -4.761278               | -0.798995 | 0.458929  |
| 19            | 1             | 0           | -5.281091               | -2.919201 | 1.383089  |
| 20            | 1             | 0           | -3.842487               | -2.310768 | 2.209599  |
| 21            | 1             | 0           | -3.688073               | -3.584949 | 0.990744  |
| 22            | 1             | 0           | -5.582435               | -2.491167 | -1.131905 |
| 23            | 1             | 0           | -4.526106               | -1.331531 | -1.953609 |
| 24            | 1             | 0           | -3.917610               | -2.943250 | -1.534839 |
| 25            | 8             | 0           | -1.746748               | -3.206763 | -0.209024 |
| 26            | 1             | 0           | -0.825908               | -3.522864 | -0.271450 |
| 27            | 8             | 0           | 0.643456                | -2.323302 | -0.203848 |
| 28            | 1             | 0           | -5.441247               | 3.102575  | 0.005095  |
| 29            | 1             | 0           | -4.483090               | 4.210715  | -0.987497 |
| 30            | 1             | 0           | -4.449532               | 4.355965  | 0.766240  |
| 31            | 8             | 0           | 0.325107                | 2.839265  | -0.031636 |
| 32            | 1             | 0           | 0.265440                | 3.800291  | -0.100605 |
| 33            | 7             | 0           | 2.381173                | -0.487208 | 0.124108  |
| 34            | 6             | 0           | 4.522496                | -1.322542 | -0.159778 |
| 35            | 6             | 0           | 4.157994                | 1.086891  | -0.146594 |
| 36            | 6             | 0           | 5.990826                | -1.144837 | 0.192512  |
| 37            | 1             | 0           | 4.395077                | -1.360674 | -1.252894 |
| 38            | 1             | 0           | 4.134422                | -2.250337 | 0.266682  |
| 39            | 6             | 0           | 5.627654                | 1.322930  | 0.183713  |
| 40            | 1             | 0           | 3.991256                | 1.102410  | -1.235348 |



|    |   |   |           |           |           |
|----|---|---|-----------|-----------|-----------|
| 41 | 1 | 0 | 3.564814  | 1.880086  | 0.306603  |
| 42 | 6 | 0 | 6.506079  | 0.190046  | -0.339618 |
| 43 | 1 | 0 | 6.553625  | -1.980852 | -0.228652 |
| 44 | 1 | 0 | 6.103753  | -1.181628 | 1.280780  |
| 45 | 1 | 0 | 5.925044  | 2.282486  | -0.245080 |
| 46 | 1 | 0 | 5.734430  | 1.399737  | 1.270605  |
| 47 | 1 | 0 | 7.546325  | 0.346932  | -0.045724 |
| 48 | 1 | 0 | 6.471993  | 0.179541  | -1.435063 |
| 49 | 7 | 0 | 3.730178  | -0.212081 | 0.397532  |
| 50 | 1 | 0 | 2.117267  | -1.472712 | -0.043811 |
| 51 | 1 | 0 | -1.841423 | 4.249842  | -0.040774 |

### Structure 20d (vacuum)

Energy (Hartrees): = -1112.7730666  
No imaginary frequencies

Standard orientation:

| Center<br>Number | Atomic<br>Number | Atomic<br>Type | Coordinates (Angstroms) |           |           |
|------------------|------------------|----------------|-------------------------|-----------|-----------|
|                  |                  |                | X                       | Y         | Z         |
| 1                | 6                | 0              | -1.854432               | -1.844257 | -0.175836 |
| 2                | 6                | 0              | -2.751164               | -0.865340 | 0.090751  |
| 3                | 6                | 0              | -2.292616               | 0.526306  | 0.070777  |
| 4                | 6                | 0              | -0.907060               | 0.832503  | -0.019935 |
| 5                | 6                | 0              | 0.065051                | -0.256876 | -0.134374 |
| 6                | 6                | 0              | -0.415635               | -1.601070 | -0.295419 |
| 7                | 6                | 0              | -4.209384               | -1.222512 | 0.325701  |
| 8                | 6                | 0              | -0.560292               | 2.201642  | -0.058991 |
| 9                | 6                | 0              | -1.508710               | 3.204802  | -0.008934 |
| 10               | 6                | 0              | -2.868575               | 2.902900  | 0.060496  |
| 11               | 6                | 0              | -3.235043               | 1.573124  | 0.099744  |
| 12               | 6                | 0              | -4.397705               | -2.302705 | 1.401012  |
| 13               | 6                | 0              | -4.886380               | -1.620332 | -0.992292 |
| 14               | 6                | 0              | -3.891007               | 4.008238  | 0.078970  |
| 15               | 6                | 0              | 1.445558                | -0.086087 | -0.053402 |
| 16               | 1                | 0              | 1.853975                | 0.893505  | 0.144245  |
| 17               | 1                | 0              | -4.290897               | 1.345657  | 0.123774  |
| 18               | 1                | 0              | -4.716856               | -0.339799 | 0.711720  |
| 19               | 1                | 0              | -5.461767               | -2.397899 | 1.632589  |
| 20               | 1                | 0              | -3.872514               | -2.029855 | 2.318996  |
| 21               | 1                | 0              | -4.028403               | -3.270190 | 1.067225  |
| 22               | 1                | 0              | -5.946327               | -1.831802 | -0.828554 |
| 23               | 1                | 0              | -4.803250               | -0.819736 | -1.731295 |
| 24               | 1                | 0              | -4.414349               | -2.516190 | -1.400486 |
| 25               | 8                | 0              | -2.190060               | -3.145413 | -0.303679 |
| 26               | 1                | 0              | -1.339598               | -3.599202 | -0.443637 |
| 27               | 8                | 0              | 0.305148                | -2.607164 | -0.476042 |
| 28               | 1                | 0              | -4.899327               | 3.607047  | 0.183869  |
| 29               | 1                | 0              | -3.853157               | 4.592171  | -0.844372 |
| 30               | 1                | 0              | -3.710845               | 4.694019  | 0.910528  |
| 31               | 8                | 0              | 0.765758                | 2.544819  | -0.161510 |
| 32               | 1                | 0              | 0.826177                | 3.500074  | -0.242529 |
| 33               | 7                | 0              | 2.349506                | -1.049227 | -0.185064 |
| 34               | 6                | 0              | 4.213942                | 0.078582  | -1.132953 |
| 35               | 6                | 0              | 4.107513                | -0.360803 | 1.263716  |
| 36               | 6                | 0              | 5.736921                | 0.135457  | -1.088560 |
| 37               | 1                | 0              | 3.799920                | 1.095176  | -1.013499 |
| 38               | 1                | 0              | 3.862192                | -0.316810 | -2.087152 |
| 39               | 6                | 0              | 5.627553                | -0.315958 | 1.373414  |
| 40               | 1                | 0              | 3.693186                | 0.640042  | 1.475843  |
| 41               | 1                | 0              | 3.681298                | -1.062002 | 1.982897  |
| 42               | 6                | 0              | 6.218292                | 0.586961  | 0.290478  |
| 43               | 1                | 0              | 6.096045                | 0.811479  | -1.868098 |
| 44               | 1                | 0              | 6.128452                | -0.862785 | -1.306105 |
| 45               | 1                | 0              | 5.907170                | 0.034973  | 2.369503  |
| 46               | 1                | 0              | 6.015602                | -1.332267 | 1.257280  |
| 47               | 1                | 0              | 7.309396                | 0.578927  | 0.337558  |
| 48               | 1                | 0              | 5.895466                | 1.620235  | 0.465570  |
| 49               | 7                | 0              | 3.729180                | -0.817035 | -0.077557 |
| 50               | 1                | 0              | 2.033019                | -1.998423 | -0.371988 |
| 51               | 1                | 0              | -1.183147               | 4.242097  | -0.041868 |

### Structure 20d (CHCl<sub>3</sub>)

Energy (Hartrees): = -1112.8008856  
No imaginary frequencies

Standard orientation:

| Center<br>Number | Atomic<br>Number | Atomic<br>Type | Coordinates (Angstroms) |           |           |
|------------------|------------------|----------------|-------------------------|-----------|-----------|
|                  |                  |                | X                       | Y         | Z         |
| 1                | 6                | 0              | -1.858876               | -1.843320 | -0.174044 |

|    |   |   |           |           |           |
|----|---|---|-----------|-----------|-----------|
| 2  | 6 | 0 | -2.754204 | -0.862227 | 0.095542  |
| 3  | 6 | 0 | -2.291513 | 0.528029  | 0.074998  |
| 4  | 6 | 0 | -0.904507 | 0.827851  | -0.032862 |
| 5  | 6 | 0 | 0.063324  | -0.265475 | -0.149941 |
| 6  | 6 | 0 | -0.420491 | -1.605646 | -0.301447 |
| 7  | 6 | 0 | -4.215294 | -1.213499 | 0.328367  |
| 8  | 6 | 0 | -0.551118 | 2.198138  | -0.089744 |
| 9  | 6 | 0 | -1.495215 | 3.205012  | -0.023955 |
| 10 | 6 | 0 | -2.856102 | 2.908547  | 0.076124  |
| 11 | 6 | 0 | -3.230233 | 1.580240  | 0.122768  |
| 12 | 6 | 0 | -4.417862 | -2.302933 | 1.391430  |
| 13 | 6 | 0 | -4.895908 | -1.591544 | -0.993034 |
| 14 | 6 | 0 | -3.870764 | 4.020070  | 0.115670  |
| 15 | 6 | 0 | 1.450031  | -0.094534 | -0.058600 |
| 16 | 1 | 0 | 1.856661  | 0.884700  | 0.144976  |
| 17 | 1 | 0 | -4.287273 | 1.360423  | 0.167488  |
| 18 | 1 | 0 | -4.717165 | -0.331407 | 0.721992  |
| 19 | 1 | 0 | -5.480950 | -2.370065 | 1.638707  |
| 20 | 1 | 0 | -3.874102 | -2.060521 | 2.308095  |
| 21 | 1 | 0 | -4.084770 | -3.279262 | 1.043642  |
| 22 | 1 | 0 | -5.957308 | -1.798750 | -0.830440 |
| 23 | 1 | 0 | -4.812888 | -0.783698 | -1.724772 |
| 24 | 1 | 0 | -4.433518 | -2.486298 | -1.416458 |
| 25 | 8 | 0 | -2.202765 | -3.144548 | -0.299119 |
| 26 | 1 | 0 | -1.357467 | -3.609408 | -0.440384 |
| 27 | 8 | 0 | 0.297017  | -2.618297 | -0.481731 |
| 28 | 1 | 0 | -4.881464 | 3.625122  | 0.226487  |
| 29 | 1 | 0 | -3.836506 | 4.613691  | -0.802045 |
| 30 | 1 | 0 | -3.675821 | 4.697163  | 0.951475  |
| 31 | 8 | 0 | 0.768962  | 2.529608  | -0.226794 |
| 32 | 1 | 0 | 0.845247  | 3.487583  | -0.310306 |
| 33 | 7 | 0 | 2.351018  | -1.053732 | -0.182299 |
| 34 | 6 | 0 | 4.222064  | 0.062401  | -1.129773 |
| 35 | 6 | 0 | 4.102036  | -0.355354 | 1.273531  |
| 36 | 6 | 0 | 5.743716  | 0.126920  | -1.075330 |
| 37 | 1 | 0 | 3.801387  | 1.075449  | -1.015802 |
| 38 | 1 | 0 | 3.879036  | -0.341980 | -2.083818 |
| 39 | 6 | 0 | 5.620750  | -0.303895 | 1.390834  |
| 40 | 1 | 0 | 3.683615  | 0.646012  | 1.467024  |
| 41 | 1 | 0 | 3.674689  | -1.050378 | 1.998362  |
| 42 | 6 | 0 | 6.215431  | 0.590102  | 0.302976  |
| 43 | 1 | 0 | 6.100643  | 0.801387  | -1.857460 |
| 44 | 1 | 0 | 6.144277  | -0.869609 | -1.286396 |
| 45 | 1 | 0 | 5.889187  | 0.059981  | 2.385506  |
| 46 | 1 | 0 | 6.016112  | -1.319607 | 1.290884  |
| 47 | 1 | 0 | 7.306557  | 0.582730  | 0.355991  |
| 48 | 1 | 0 | 5.889302  | 1.623995  | 0.467299  |
| 49 | 7 | 0 | 3.734241  | -0.829144 | -0.068008 |
| 50 | 1 | 0 | 2.041460  | -2.003496 | -0.375562 |
| 51 | 1 | 0 | -1.163064 | 4.238971  | -0.072227 |

### Structure 20d (DMSO)

Energy (Hartrees): = -1112.7964679  
No imaginary frequencies

Standard orientation:

| Center<br>Number | Atomic<br>Number | Atomic<br>Type | Coordinates (Angstroms) |           |           |
|------------------|------------------|----------------|-------------------------|-----------|-----------|
|                  |                  |                | X                       | Y         | Z         |
| 1                | 6                | 0              | -1.859961               | -1.845342 | -0.169423 |
| 2                | 6                | 0              | -2.754913               | -0.863417 | 0.099165  |
| 3                | 6                | 0              | -2.290263               | 0.525947  | 0.074522  |
| 4                | 6                | 0              | -0.901958               | 0.823969  | -0.026265 |
| 5                | 6                | 0              | 0.064890                | -0.270635 | -0.143481 |
| 6                | 6                | 0              | -0.420942               | -1.608146 | -0.300183 |
| 7                | 6                | 0              | -4.216923               | -1.207076 | 0.335097  |
| 8                | 6                | 0              | -0.547421               | 2.195241  | -0.077670 |
| 9                | 6                | 0              | -1.491972               | 3.202826  | -0.022621 |
| 10               | 6                | 0              | -2.854428               | 2.906555  | 0.064202  |
| 11               | 6                | 0              | -3.230303               | 1.578266  | 0.111413  |
| 12               | 6                | 0              | -4.424539               | -2.306888 | 1.385290  |
| 13               | 6                | 0              | -4.906661               | -1.563298 | -0.986932 |
| 14               | 6                | 0              | -3.868710               | 4.018148  | 0.090135  |
| 15               | 6                | 0              | 1.454259                | -0.100476 | -0.051615 |
| 16               | 1                | 0              | 1.862974                | 0.876560  | 0.158560  |
| 17               | 1                | 0              | -4.287911               | 1.358418  | 0.148320  |
| 18               | 1                | 0              | -4.710194               | -0.325734 | 0.740907  |
| 19               | 1                | 0              | -5.486960               | -2.364350 | 1.637333  |
| 20               | 1                | 0              | -3.874174               | -2.081194 | 2.302606  |
| 21               | 1                | 0              | -4.103850               | -3.282837 | 1.024620  |
| 22               | 1                | 0              | -5.968558               | -1.764645 | -0.820550 |
| 23               | 1                | 0              | -4.823301               | -0.746073 | -1.708408 |
| 24               | 1                | 0              | -4.453212               | -2.456289 | -1.424679 |
| 25               | 8                | 0              | -2.199515               | -3.147514 | -0.293204 |

|    |   |   |           |           |           |
|----|---|---|-----------|-----------|-----------|
| 26 | 1 | 0 | -1.348787 | -3.600857 | -0.439641 |
| 27 | 8 | 0 | 0.292900  | -2.622748 | -0.487992 |
| 28 | 1 | 0 | -4.880022 | 3.623513  | 0.196926  |
| 29 | 1 | 0 | -3.826077 | 4.606505  | -0.830610 |
| 30 | 1 | 0 | -3.676915 | 4.700995  | 0.921927  |
| 31 | 8 | 0 | 0.772046  | 2.524758  | -0.200729 |
| 32 | 1 | 0 | 0.851124  | 3.485221  | -0.258557 |
| 33 | 7 | 0 | 2.352792  | -1.058677 | -0.179673 |
| 34 | 6 | 0 | 4.226141  | 0.040795  | -1.138950 |
| 35 | 6 | 0 | 4.099756  | -0.338317 | 1.271906  |
| 36 | 6 | 0 | 5.747039  | 0.112005  | -1.080161 |
| 37 | 1 | 0 | 3.801716  | 1.052915  | -1.038609 |
| 38 | 1 | 0 | 3.887951  | -0.380265 | -2.087688 |
| 39 | 6 | 0 | 5.617894  | -0.279792 | 1.391050  |
| 40 | 1 | 0 | 3.679253  | 0.664954  | 1.445572  |
| 41 | 1 | 0 | 3.673474  | -1.023059 | 2.007368  |
| 42 | 6 | 0 | 6.210497  | 0.600854  | 0.291664  |
| 43 | 1 | 0 | 6.102043  | 0.775224  | -1.872551 |
| 44 | 1 | 0 | 6.155139  | -0.885526 | -1.273188 |
| 45 | 1 | 0 | 5.880850  | 0.100810  | 2.380861  |
| 46 | 1 | 0 | 6.019526  | -1.294938 | 1.307948  |
| 47 | 1 | 0 | 7.301503  | 0.601881  | 0.348815  |
| 48 | 1 | 0 | 5.874672  | 1.634086  | 0.438075  |
| 49 | 7 | 0 | 3.737353  | -0.836741 | -0.063750 |
| 50 | 1 | 0 | 2.045554  | -2.007571 | -0.379905 |
| 51 | 1 | 0 | -1.159178 | 4.236900  | -0.068944 |

-----

### Structure 21a (vacuum)

Energy (Hartrees): = -1191.3849117  
 No imaginary frequencies

Standard orientation:

| Center<br>Number | Atomic<br>Number | Atomic<br>Type | Coordinates (Angstroms) |           |           |
|------------------|------------------|----------------|-------------------------|-----------|-----------|
|                  |                  |                | X                       | Y         | Z         |
| 1                | 6                | 0              | 4.874940                | -2.118858 | 1.167330  |
| 2                | 6                | 0              | 4.652778                | 3.693679  | -0.521000 |
| 3                | 6                | 0              | -1.168259               | 0.327499  | 0.084208  |
| 4                | 6                | 0              | 2.207470                | 3.187182  | -0.202814 |
| 5                | 6                | 0              | 3.524095                | 2.714246  | -0.340755 |
| 6                | 6                | 0              | 3.737245                | 1.362321  | -0.289034 |
| 7                | 6                | 0              | 2.680448                | 0.427025  | -0.118021 |
| 8                | 6                | 0              | 1.335568                | 0.905796  | -0.016932 |
| 9                | 6                | 0              | 1.157547                | 2.321226  | -0.032827 |
| 10               | 6                | 0              | 4.360257                | -1.563219 | -0.167998 |
| 11               | 6                | 0              | 4.437949                | -2.612995 | -1.286696 |
| 12               | 6                | 0              | 2.962271                | -0.982901 | -0.020993 |
| 13               | 6                | 0              | 1.919892                | -1.828441 | 0.254749  |
| 14               | 6                | 0              | 0.577610                | -1.367732 | 0.320866  |
| 15               | 6                | 0              | 0.253919                | -0.032868 | 0.153350  |
| 16               | 1                | 0              | -1.417972               | 1.331954  | -0.215031 |
| 17               | 1                | 0              | 4.756043                | 1.012977  | -0.360508 |
| 18               | 1                | 0              | 1.239840                | -3.547883 | 0.597159  |
| 19               | 1                | 0              | 5.899802                | -2.481482 | 1.053357  |
| 20               | 8                | 0              | -0.104528               | 2.826173  | 0.152715  |
| 21               | 1                | 0              | 4.519320                | 4.276589  | -1.436165 |
| 22               | 1                | 0              | 5.612311                | 3.179992  | -0.583776 |
| 23               | 1                | 0              | 4.696782                | 4.397207  | 0.314382  |
| 24               | 8                | 0              | -0.324850               | -2.338536 | 0.536140  |
| 25               | 1                | 0              | 4.867972                | -1.343307 | 1.936715  |
| 26               | 1                | 0              | 4.251311                | -2.947536 | 1.504350  |
| 27               | 8                | 0              | 2.110877                | -3.159706 | 0.438051  |
| 28               | 1                | 0              | 5.036980                | -0.764984 | -0.463916 |
| 29               | 1                | 0              | 5.477797                | -2.917953 | -1.430306 |
| 30               | 1                | 0              | 4.071154                | -2.199854 | -2.229012 |
| 31               | 1                | 0              | 3.849793                | -3.496697 | -1.043718 |
| 32               | 1                | 0              | -1.223900               | -1.884027 | 0.595153  |
| 33               | 1                | 0              | -0.046885               | 3.784967  | 0.178536  |
| 34               | 7                | 0              | -2.068783               | -0.550336 | 0.347503  |
| 35               | 7                | 0              | -3.430184               | -0.262187 | 0.307151  |
| 36               | 6                | 0              | -3.810302               | 1.159143  | 0.227803  |
| 37               | 6                | 0              | -4.049731               | -1.161779 | -0.694877 |
| 38               | 6                | 0              | -5.336858               | 1.283030  | 0.197545  |
| 39               | 1                | 0              | -3.416465               | 1.614948  | -0.698477 |
| 40               | 6                | 0              | -5.566914               | -1.012494 | -0.681903 |
| 41               | 1                | 0              | -3.682954               | -0.867946 | -1.695199 |
| 42               | 6                | 0              | -5.978954               | 0.436464  | -0.889656 |
| 43               | 1                | 0              | -5.584019               | 2.340400  | 0.072305  |
| 44               | 1                | 0              | -5.722645               | 0.970950  | 1.174805  |
| 45               | 1                | 0              | -5.980221               | -1.656571 | -1.462243 |
| 46               | 1                | 0              | -5.945943               | -1.374909 | 0.280713  |
| 47               | 1                | 0              | -7.066136               | 0.541842  | -0.865653 |
| 48               | 1                | 0              | -5.641487               | 0.777008  | -1.875582 |
| 49               | 6                | 0              | -3.660482               | -2.614346 | -0.431382 |

|    |   |   |           |           |           |
|----|---|---|-----------|-----------|-----------|
| 50 | 1 | 0 | -2.620616 | -2.821532 | -0.678323 |
| 51 | 1 | 0 | -3.826904 | -2.852113 | 0.622427  |
| 52 | 1 | 0 | -4.287481 | -3.270148 | -1.038729 |
| 53 | 6 | 0 | -3.306612 | 1.921227  | 1.459426  |
| 54 | 1 | 0 | -3.602766 | 1.369402  | 2.354218  |
| 55 | 1 | 0 | -2.229748 | 2.071895  | 1.491971  |
| 56 | 1 | 0 | -3.781793 | 2.904194  | 1.488826  |
| 57 | 1 | 0 | 2.016336  | 4.257614  | -0.208429 |

### Structure 21a (CHCl<sub>3</sub>)

Energy (Hartrees): = -1191.4115246  
No imaginary frequencies

Standard orientation:

| Center<br>Number | Atomic<br>Number | Atomic<br>Type | Coordinates (Angstroms) |           |           |
|------------------|------------------|----------------|-------------------------|-----------|-----------|
|                  |                  |                | X                       | Y         | Z         |
| 1                | 6                | 0              | 4.872535                | -2.127744 | 1.169557  |
| 2                | 6                | 0              | 4.644687                | 3.697770  | -0.547846 |
| 3                | 6                | 0              | -1.168739               | 0.330583  | 0.089174  |
| 4                | 6                | 0              | 2.205280                | 3.191772  | -0.192085 |
| 5                | 6                | 0              | 3.519745                | 2.717091  | -0.353724 |
| 6                | 6                | 0              | 3.736627                | 1.363837  | -0.308056 |
| 7                | 6                | 0              | 2.681373                | 0.427663  | -0.121864 |
| 8                | 6                | 0              | 1.336910                | 0.907294  | -0.008598 |
| 9                | 6                | 0              | 1.156701                | 2.324724  | -0.011009 |
| 10               | 6                | 0              | 4.362858                | -1.563104 | -0.163441 |
| 11               | 6                | 0              | 4.450666                | -2.603308 | -1.289355 |
| 12               | 6                | 0              | 2.962745                | -0.983775 | -0.020988 |
| 13               | 6                | 0              | 1.919040                | -1.829293 | 0.255060  |
| 14               | 6                | 0              | 0.576768                | -1.368097 | 0.324514  |
| 15               | 6                | 0              | 0.254464                | -0.031911 | 0.161304  |
| 16               | 1                | 0              | -1.418275               | 1.334994  | -0.210930 |
| 17               | 1                | 0              | 4.755067                | 1.017053  | -0.399215 |
| 18               | 1                | 0              | 1.246623                | -3.562251 | 0.593790  |
| 19               | 1                | 0              | 5.901143                | -2.482074 | 1.059039  |
| 20               | 8                | 0              | -0.098969               | 2.820237  | 0.201025  |
| 21               | 1                | 0              | 4.499679                | 4.279806  | -1.462336 |
| 22               | 1                | 0              | 5.605361                | 3.186307  | -0.619464 |
| 23               | 1                | 0              | 4.693778                | 4.404964  | 0.284584  |
| 24               | 8                | 0              | -0.329261               | -2.335371 | 0.539262  |
| 25               | 1                | 0              | 4.859548                | -1.359191 | 1.946673  |
| 26               | 1                | 0              | 4.256173                | -2.964823 | 1.501024  |
| 27               | 8                | 0              | 2.113185                | -3.160622 | 0.435268  |
| 28               | 1                | 0              | 5.042011                | -0.762576 | -0.445719 |
| 29               | 1                | 0              | 5.493064                | -2.901217 | -1.432968 |
| 30               | 1                | 0              | 4.086625                | -2.186838 | -2.232097 |
| 31               | 1                | 0              | 3.868176                | -3.495115 | -1.059240 |
| 32               | 1                | 0              | -1.229997               | -1.874312 | 0.590949  |
| 33               | 1                | 0              | -0.054357               | 3.783406  | 0.231625  |
| 34               | 7                | 0              | -2.068007               | -0.549027 | 0.351009  |
| 35               | 7                | 0              | -3.431030               | -0.265989 | 0.314182  |
| 36               | 6                | 0              | -3.810725               | 1.158151  | 0.224634  |
| 37               | 6                | 0              | -4.047507               | -1.168982 | -0.692393 |
| 38               | 6                | 0              | -5.336387               | 1.286267  | 0.175726  |
| 39               | 1                | 0              | -3.402894               | 1.605935  | -0.697766 |
| 40               | 6                | 0              | -5.564031               | -1.015040 | -0.690229 |
| 41               | 1                | 0              | -3.672986               | -0.874569 | -1.688418 |
| 42               | 6                | 0              | -5.969483               | 0.433677  | -0.911804 |
| 43               | 1                | 0              | -5.575564               | 2.344112  | 0.039011  |
| 44               | 1                | 0              | -5.736491               | 0.983843  | 1.150482  |
| 45               | 1                | 0              | -5.971283               | -1.663330 | -1.470183 |
| 46               | 1                | 0              | -5.952940               | -1.370218 | 0.271510  |
| 47               | 1                | 0              | -7.056728               | 0.541213  | -0.896087 |
| 48               | 1                | 0              | -5.622829               | 0.766121  | -1.897319 |
| 49               | 6                | 0              | -3.662514               | -2.621387 | -0.425842 |
| 50               | 1                | 0              | -2.622828               | -2.833611 | -0.672847 |
| 51               | 1                | 0              | -3.833166               | -2.866198 | 0.626341  |
| 52               | 1                | 0              | -4.287893               | -3.275321 | -1.037628 |
| 53               | 6                | 0              | -3.321379               | 1.924097  | 1.457723  |
| 54               | 1                | 0              | -3.683028               | 1.417400  | 2.355828  |
| 55               | 1                | 0              | -2.240053               | 2.022502  | 1.535503  |
| 56               | 1                | 0              | -3.743213               | 2.931808  | 1.439832  |
| 57               | 1                | 0              | 2.013081                | 4.261631  | -0.187509 |

### Structure 21a (DMSO)

Energy (Hartrees): = -1191.4053048  
No imaginary frequencies

Standard orientation:

| Center | Atomic | Atomic | Coordinates (Angstroms) |  |  |
|--------|--------|--------|-------------------------|--|--|
|--------|--------|--------|-------------------------|--|--|

| Number | Number | Type | X         | Y         | Z         |
|--------|--------|------|-----------|-----------|-----------|
| 1      | 6      | 0    | 4.866976  | -2.130201 | 1.184641  |
| 2      | 6      | 0    | 4.658691  | 3.689332  | -0.533707 |
| 3      | 6      | 0    | -1.170720 | 0.334262  | 0.082122  |
| 4      | 6      | 0    | 2.214720  | 3.190792  | -0.205460 |
| 5      | 6      | 0    | 3.529779  | 2.712189  | -0.349257 |
| 6      | 6      | 0    | 3.743653  | 1.357993  | -0.297129 |
| 7      | 6      | 0    | 2.683618  | 0.425482  | -0.118394 |
| 8      | 6      | 0    | 1.338539  | 0.908440  | -0.018272 |
| 9      | 6      | 0    | 1.161560  | 2.326992  | -0.032929 |
| 10     | 6      | 0    | 4.363435  | -1.565775 | -0.150070 |
| 11     | 6      | 0    | 4.456576  | -2.606254 | -1.274628 |
| 12     | 6      | 0    | 2.962650  | -0.986807 | -0.014958 |
| 13     | 6      | 0    | 1.915605  | -1.830499 | 0.254365  |
| 14     | 6      | 0    | 0.573158  | -1.366394 | 0.313561  |
| 15     | 6      | 0    | 0.253218  | -0.029041 | 0.149298  |
| 16     | 1      | 0    | -1.424735 | 1.340773  | -0.205839 |
| 17     | 1      | 0    | 4.762633  | 1.009759  | -0.377364 |
| 18     | 1      | 0    | 1.232165  | -3.555613 | 0.590712  |
| 19     | 1      | 0    | 5.897414  | -2.480304 | 1.078478  |
| 20     | 8      | 0    | -0.094020 | 2.827402  | 0.155681  |
| 21     | 1      | 0    | 4.516441  | 4.277929  | -1.444312 |
| 22     | 1      | 0    | 5.617347  | 3.174040  | -0.605119 |
| 23     | 1      | 0    | 4.705176  | 4.391992  | 0.302659  |
| 24     | 8      | 0    | -0.335094 | -2.331318 | 0.522329  |
| 25     | 1      | 0    | 4.848658  | -1.362484 | 1.962765  |
| 26     | 1      | 0    | 4.252351  | -2.970234 | 1.512550  |
| 27     | 8      | 0    | 2.103094  | -3.162291 | 0.437189  |
| 28     | 1      | 0    | 5.044582  | -0.766259 | -0.429222 |
| 29     | 1      | 0    | 5.499701  | -2.904418 | -1.411278 |
| 30     | 1      | 0    | 4.099959  | -2.189716 | -2.220421 |
| 31     | 1      | 0    | 3.872273  | -3.497983 | -1.048275 |
| 32     | 1      | 0    | -1.237793 | -1.865917 | 0.559710  |
| 33     | 1      | 0    | -0.048644 | 3.792072  | 0.155567  |
| 34     | 7      | 0    | -2.067831 | -0.550249 | 0.336531  |
| 35     | 7      | 0    | -3.431263 | -0.269392 | 0.313585  |
| 36     | 6      | 0    | -3.812953 | 1.157017  | 0.244298  |
| 37     | 6      | 0    | -4.054216 | -1.158968 | -0.702997 |
| 38     | 6      | 0    | -5.338761 | 1.282974  | 0.209194  |
| 39     | 1      | 0    | -3.412435 | 1.615244  | -0.675152 |
| 40     | 6      | 0    | -5.570425 | -1.006518 | -0.687351 |
| 41     | 1      | 0    | -3.686517 | -0.848171 | -1.695821 |
| 42     | 6      | 0    | -5.978488 | 0.444620  | -0.885082 |
| 43     | 1      | 0    | -5.578724 | 2.342339  | 0.088258  |
| 44     | 1      | 0    | -5.732391 | 0.967515  | 1.182717  |
| 45     | 1      | 0    | -5.981366 | -1.644017 | -1.474165 |
| 46     | 1      | 0    | -5.953126 | -1.376150 | 0.271713  |
| 47     | 1      | 0    | -7.065770 | 0.550405  | -0.859613 |
| 48     | 1      | 0    | -5.638532 | 0.790909  | -1.868005 |
| 49     | 6      | 0    | -3.666613 | -2.614392 | -0.460378 |
| 50     | 1      | 0    | -2.628630 | -2.822917 | -0.717996 |
| 51     | 1      | 0    | -3.830866 | -2.876896 | 0.588844  |
| 52     | 1      | 0    | -4.296106 | -3.258433 | -1.078330 |
| 53     | 6      | 0    | -3.315722 | 1.907683  | 1.483101  |
| 54     | 1      | 0    | -3.668270 | 1.389934  | 2.378996  |
| 55     | 1      | 0    | -2.233977 | 2.010574  | 1.552512  |
| 56     | 1      | 0    | -3.740188 | 2.914268  | 1.480960  |
| 57     | 1      | 0    | 2.025511  | 4.261346  | -0.207744 |

### Structure 21b (vacuum)

Energy (Hartrees): = -1191.3905497  
 No imaginary frequencies

Standard orientation:

| Center Number | Atomic Number | Atomic Type | Coordinates (Angstroms) |           |           |
|---------------|---------------|-------------|-------------------------|-----------|-----------|
|               |               |             | X                       | Y         | Z         |
| 1             | 6             | 0           | 4.394952                | -2.765370 | 1.060887  |
| 2             | 6             | 0           | 4.789380                | 3.589555  | 0.538685  |
| 3             | 6             | 0           | -1.128888               | 0.389252  | 0.162112  |
| 4             | 6             | 0           | 2.317980                | 3.158679  | 0.342676  |
| 5             | 6             | 0           | 3.626998                | 2.645636  | 0.383636  |
| 6             | 6             | 0           | 3.804763                | 1.292186  | 0.259710  |
| 7             | 6             | 0           | 2.715388                | 0.392711  | 0.107369  |
| 8             | 6             | 0           | 1.385994                | 0.912161  | 0.101808  |
| 9             | 6             | 0           | 1.238191                | 2.325987  | 0.190839  |
| 10            | 6             | 0           | 4.324564                | -1.648355 | 0.008568  |
| 11            | 6             | 0           | 4.795345                | -2.134740 | -1.368741 |
| 12            | 6             | 0           | 2.942871                | -1.020130 | -0.071535 |
| 13            | 6             | 0           | 1.864897                | -1.815197 | -0.360096 |
| 14            | 6             | 0           | 0.535889                | -1.307165 | -0.358425 |
| 15            | 6             | 0           | 0.269068                | 0.020577  | -0.072274 |
| 16            | 1             | 0           | -1.369326               | 1.301015  | 0.696846  |

|    |   |   |           |           |           |
|----|---|---|-----------|-----------|-----------|
| 17 | 1 | 0 | 4.817274  | 0.917252  | 0.252371  |
| 18 | 1 | 0 | 1.120388  | -3.495274 | -0.767136 |
| 19 | 1 | 0 | 5.430163  | -3.099031 | 1.169008  |
| 20 | 8 | 0 | -0.023191 | 2.845001  | 0.087390  |
| 21 | 1 | 0 | 4.806824  | 4.323230  | -0.271409 |
| 22 | 1 | 0 | 5.737001  | 3.050830  | 0.529839  |
| 23 | 1 | 0 | 4.720115  | 4.140186  | 1.480424  |
| 24 | 8 | 0 | -0.404621 | -2.233812 | -0.595455 |
| 25 | 1 | 0 | 4.051628  | -2.401647 | 2.031927  |
| 26 | 1 | 0 | 3.785069  | -3.621273 | 0.776299  |
| 27 | 8 | 0 | 2.007169  | -3.139378 | -0.621920 |
| 28 | 1 | 0 | 5.027485  | -0.887441 | 0.340759  |
| 29 | 1 | 0 | 5.808054  | -2.539919 | -1.298201 |
| 30 | 1 | 0 | 4.803483  | -1.311631 | -2.086972 |
| 31 | 1 | 0 | 4.135440  | -2.917182 | -1.745162 |
| 32 | 1 | 0 | -1.292127 | -1.760895 | -0.595288 |
| 33 | 1 | 0 | 0.038291  | 3.803819  | 0.080681  |
| 34 | 7 | 0 | -2.078226 | -0.387287 | -0.206507 |
| 35 | 7 | 0 | -3.381727 | 0.062644  | 0.160862  |
| 36 | 6 | 0 | -4.052766 | 0.578095  | -1.055808 |
| 37 | 6 | 0 | -4.092657 | -1.103808 | 0.727196  |
| 38 | 6 | 0 | -5.467662 | 1.020757  | -0.684244 |
| 39 | 1 | 0 | -4.114806 | -0.233292 | -1.802266 |
| 40 | 6 | 0 | -5.504813 | -0.684951 | 1.126477  |
| 41 | 1 | 0 | -4.160201 | -1.891301 | -0.045030 |
| 42 | 6 | 0 | -6.272059 | -0.112868 | -0.059286 |
| 43 | 1 | 0 | -5.961311 | 1.399540  | -1.583171 |
| 44 | 1 | 0 | -5.387434 | 1.853007  | 0.024175  |
| 45 | 1 | 0 | -6.021578 | -1.552364 | 1.545778  |
| 46 | 1 | 0 | -5.426868 | 0.067509  | 1.919403  |
| 47 | 1 | 0 | -7.258656 | 0.239574  | 0.251019  |
| 48 | 1 | 0 | -6.430812 | -0.900393 | -0.804977 |
| 49 | 6 | 0 | -3.331859 | -1.647822 | 1.930589  |
| 50 | 1 | 0 | -2.364613 | -2.062819 | 1.646657  |
| 51 | 1 | 0 | -3.165106 | -0.845860 | 2.654800  |
| 52 | 1 | 0 | -3.913694 | -2.436788 | 2.411735  |
| 53 | 6 | 0 | -3.275329 | 1.745924  | -1.652324 |
| 54 | 1 | 0 | -3.114440 | 2.513376  | -0.889921 |
| 55 | 1 | 0 | -2.304569 | 1.442648  | -2.043066 |
| 56 | 1 | 0 | -3.849381 | 2.184348  | -2.471442 |
| 57 | 1 | 0 | 2.157038  | 4.232112  | 0.404795  |

-----

### Structure 21b (CHCl<sub>3</sub>)

Energy (Hartrees): = -1191.4169303  
 No imaginary frequencies

Standard orientation:

| Center<br>Number | Atomic<br>Number | Atomic<br>Type | Coordinates (Angstroms) |           |           |
|------------------|------------------|----------------|-------------------------|-----------|-----------|
|                  |                  |                | X                       | Y         | Z         |
| 1                | 6                | 0              | 4.396794                | -2.761096 | 1.063277  |
| 2                | 6                | 0              | 4.798083                | 3.584434  | 0.546655  |
| 3                | 6                | 0              | -1.127311               | 0.399202  | 0.166144  |
| 4                | 6                | 0              | 2.326435                | 3.161767  | 0.340885  |
| 5                | 6                | 0              | 3.634318                | 2.643599  | 0.385455  |
| 6                | 6                | 0              | 3.811299                | 1.288521  | 0.259544  |
| 7                | 6                | 0              | 2.719051                | 0.391522  | 0.102477  |
| 8                | 6                | 0              | 1.390373                | 0.915180  | 0.097272  |
| 9                | 6                | 0              | 1.244115                | 2.331368  | 0.184594  |
| 10               | 6                | 0              | 4.323333                | -1.654636 | 0.000509  |
| 11               | 6                | 0              | 4.791766                | -2.156729 | -1.371403 |
| 12               | 6                | 0              | 2.941910                | -1.023168 | -0.078077 |
| 13               | 6                | 0              | 1.860066                | -1.816004 | -0.362546 |
| 14               | 6                | 0              | 0.532089                | -1.304470 | -0.356383 |
| 15               | 6                | 0              | 0.270410                | 0.025092  | -0.071989 |
| 16               | 1                | 0              | -1.361114               | 1.313643  | 0.699310  |
| 17               | 1                | 0              | 4.824083                | 0.913433  | 0.258513  |
| 18               | 1                | 0              | 1.119171                | -3.510763 | -0.761493 |
| 19               | 1                | 0              | 5.432798                | -3.092989 | 1.173607  |
| 20               | 8                | 0              | -0.012631               | 2.848125  | 0.074215  |
| 21               | 1                | 0              | 4.808470                | 4.331580  | -0.251652 |
| 22               | 1                | 0              | 5.746212                | 3.045837  | 0.523569  |
| 23               | 1                | 0              | 4.733524                | 4.122540  | 1.496434  |
| 24               | 8                | 0              | -0.414067               | -2.225868 | -0.589001 |
| 25               | 1                | 0              | 4.056241                | -2.390618 | 2.033557  |
| 26               | 1                | 0              | 3.788246                | -3.623136 | 0.791269  |
| 27               | 8                | 0              | 2.002635                | -3.140738 | -0.621659 |
| 28               | 1                | 0              | 5.030219                | -0.892633 | 0.319823  |
| 29               | 1                | 0              | 5.806911                | -2.556462 | -1.297441 |
| 30               | 1                | 0              | 4.798932                | -1.343948 | -2.102161 |
| 31               | 1                | 0              | 4.137596                | -2.947662 | -1.741619 |
| 32               | 1                | 0              | -1.301496               | -1.747634 | -0.576071 |
| 33               | 1                | 0              | 0.039305                | 3.811156  | 0.090380  |
| 34               | 7                | 0              | -2.078642               | -0.377337 | -0.195641 |

|    |   |   |           |           |           |
|----|---|---|-----------|-----------|-----------|
| 35 | 7 | 0 | -3.383492 | 0.073111  | 0.167514  |
| 36 | 6 | 0 | -4.055702 | 0.566589  | -1.061529 |
| 37 | 6 | 0 | -4.091871 | -1.093226 | 0.744731  |
| 38 | 6 | 0 | -5.473808 | 1.006599  | -0.699928 |
| 39 | 1 | 0 | -4.111007 | -0.259507 | -1.790973 |
| 40 | 6 | 0 | -5.508412 | -0.678318 | 1.132806  |
| 41 | 1 | 0 | -4.150060 | -1.887271 | -0.020384 |
| 42 | 6 | 0 | -6.274356 | -0.121902 | -0.061264 |
| 43 | 1 | 0 | -5.965847 | 1.367952  | -1.606865 |
| 44 | 1 | 0 | -5.402388 | 1.850662  | -0.004377 |
| 45 | 1 | 0 | -6.020802 | -1.546565 | 1.555994  |
| 46 | 1 | 0 | -5.440774 | 0.080999  | 1.920737  |
| 47 | 1 | 0 | -7.261786 | 0.232557  | 0.244977  |
| 48 | 1 | 0 | -6.430442 | -0.918698 | -0.797510 |
| 49 | 6 | 0 | -3.334639 | -1.619600 | 1.957221  |
| 50 | 1 | 0 | -2.362773 | -2.033626 | 1.685187  |
| 51 | 1 | 0 | -3.176095 | -0.813129 | 2.679160  |
| 52 | 1 | 0 | -3.914355 | -2.408765 | 2.441735  |
| 53 | 6 | 0 | -3.283920 | 1.726343  | -1.679089 |
| 54 | 1 | 0 | -3.129705 | 2.515610  | -0.937161 |
| 55 | 1 | 0 | -2.311127 | 1.421689  | -2.065913 |
| 56 | 1 | 0 | -3.860074 | 2.141720  | -2.509294 |
| 57 | 1 | 0 | 2.165456  | 4.235057  | 0.400935  |

### Structure 21b (DMSO)

Energy (Hartrees): = -1191.4103605

No imaginary frequencies

Standard orientation:

| Center<br>Number | Atomic<br>Number | Atomic<br>Type | Coordinates (Angstroms) |           |           |
|------------------|------------------|----------------|-------------------------|-----------|-----------|
|                  |                  |                | X                       | Y         | Z         |
| 1                | 6                | 0              | 4.380010                | -2.790574 | 1.050213  |
| 2                | 6                | 0              | 4.835070                | 3.555419  | 0.528421  |
| 3                | 6                | 0              | -1.127003               | 0.421740  | 0.168420  |
| 4                | 6                | 0              | 2.358072                | 3.156982  | 0.340889  |
| 5                | 6                | 0              | 3.661170                | 2.626276  | 0.377960  |
| 6                | 6                | 0              | 3.824899                | 1.268702  | 0.252975  |
| 7                | 6                | 0              | 2.722415                | 0.382917  | 0.103114  |
| 8                | 6                | 0              | 1.397862                | 0.918662  | 0.102321  |
| 9                | 6                | 0              | 1.266667                | 2.336683  | 0.190667  |
| 10               | 6                | 0              | 4.311092                | -1.673520 | -0.000853 |
| 11               | 6                | 0              | 4.777209                | -2.161964 | -1.377768 |
| 12               | 6                | 0              | 2.933406                | -1.034415 | -0.075922 |
| 13               | 6                | 0              | 1.844615                | -1.817897 | -0.358963 |
| 14               | 6                | 0              | 0.520183                | -1.295365 | -0.348371 |
| 15               | 6                | 0              | 0.269297                | 0.037266  | -0.064604 |
| 16               | 1                | 0              | -1.357860               | 1.346431  | 0.684754  |
| 17               | 1                | 0              | 4.834603                | 0.884941  | 0.244934  |
| 18               | 1                | 0              | 1.082525                | -3.498475 | -0.757744 |
| 19               | 1                | 0              | 5.414573                | -3.128821 | 1.153681  |
| 20               | 8                | 0              | 0.016526                | 2.867591  | 0.087478  |
| 21               | 1                | 0              | 4.850345                | 4.294744  | -0.276980 |
| 22               | 1                | 0              | 5.776565                | 3.005146  | 0.509801  |
| 23               | 1                | 0              | 4.775775                | 4.104990  | 1.471880  |
| 24               | 8                | 0              | -0.432157               | -2.209121 | -0.577708 |
| 25               | 1                | 0              | 4.046082                | -2.427241 | 2.025733  |
| 26               | 1                | 0              | 3.765816                | -3.647063 | 0.773352  |
| 27               | 8                | 0              | 1.972256                | -3.142825 | -0.622164 |
| 28               | 1                | 0              | 5.021359                | -0.918637 | 0.326855  |
| 29               | 1                | 0              | 5.791315                | -2.564903 | -1.308108 |
| 30               | 1                | 0              | 4.787719                | -1.340328 | -2.098849 |
| 31               | 1                | 0              | 4.120833                | -2.946729 | -1.758055 |
| 32               | 1                | 0              | -1.317844               | -1.721767 | -0.548931 |
| 33               | 1                | 0              | 0.082266                | 3.830731  | 0.111861  |
| 34               | 7                | 0              | -2.079472               | -0.359161 | -0.181144 |
| 35               | 7                | 0              | -3.386897               | 0.095437  | 0.166525  |
| 36               | 6                | 0              | -4.062389               | 0.531154  | -1.084518 |
| 37               | 6                | 0              | -4.085363               | -1.055441 | 0.788911  |
| 38               | 6                | 0              | -5.487517               | 0.965605  | -0.746899 |
| 39               | 1                | 0              | -4.103728               | -0.324721 | -1.778931 |
| 40               | 6                | 0              | -5.508992               | -0.643527 | 1.151991  |
| 41               | 1                | 0              | -4.128243               | -1.880502 | 0.057283  |
| 42               | 6                | 0              | -6.275299               | -0.147821 | -0.068102 |
| 43               | 1                | 0              | -5.978371               | 1.282320  | -1.670873 |
| 44               | 1                | 0              | -5.433283               | 1.839054  | -0.086489 |
| 45               | 1                | 0              | -6.010520               | -1.500983 | 1.608543  |
| 46               | 1                | 0              | -5.457481               | 0.148414  | 1.908762  |
| 47               | 1                | 0              | -7.269626               | 0.204129  | 0.217893  |
| 48               | 1                | 0              | -6.413855               | -0.976088 | -0.772330 |
| 49               | 6                | 0              | -3.328806               | -1.519612 | 2.026638  |
| 50               | 1                | 0              | -2.348980               | -1.930301 | 1.778067  |
| 51               | 1                | 0              | -3.187425               | -0.682772 | 2.717338  |
| 52               | 1                | 0              | -3.900031               | -2.297348 | 2.538802  |

|    |   |   |           |          |           |
|----|---|---|-----------|----------|-----------|
| 53 | 6 | 0 | -3.304076 | 1.675546 | -1.744329 |
| 54 | 1 | 0 | -3.169186 | 2.498689 | -1.036190 |
| 55 | 1 | 0 | -2.323921 | 1.370266 | -2.112394 |
| 56 | 1 | 0 | -3.880881 | 2.044710 | -2.595562 |
| 57 | 1 | 0 | 2.207908  | 4.232144 | 0.400241  |

### Structure 21c (vacuum)

Energy (Hartrees): = -1191.3849118

No imaginary frequencies

Standard orientation:

| Center<br>Number | Atomic<br>Number | Atomic<br>Type | Coordinates (Angstroms) |           |           |
|------------------|------------------|----------------|-------------------------|-----------|-----------|
|                  |                  |                | X                       | Y         | Z         |
| 1                | 6                | 0              | -4.438425               | -2.612021 | -1.286772 |
| 2                | 6                | 0              | -4.651979               | 3.694202  | -0.521607 |
| 3                | 6                | 0              | 1.168290                | 0.327163  | 0.084466  |
| 4                | 6                | 0              | -2.206850               | 3.187269  | -0.202851 |
| 5                | 6                | 0              | -3.523525               | 2.714557  | -0.341096 |
| 6                | 6                | 0              | -3.736931               | 1.362679  | -0.289273 |
| 7                | 6                | 0              | -2.680348               | 0.427193  | -0.117913 |
| 8                | 6                | 0              | -1.335392               | 0.905739  | -0.016710 |
| 9                | 6                | 0              | -1.157119               | 2.321140  | -0.032566 |
| 10               | 6                | 0              | -4.360475               | -1.562853 | -0.167528 |
| 11               | 6                | 0              | -4.874846               | -2.119213 | 1.167619  |
| 12               | 6                | 0              | -2.962403               | -0.982686 | -0.020757 |
| 13               | 6                | 0              | -1.920097               | -1.828441 | 0.254637  |
| 14               | 6                | 0              | -0.577749               | -1.367949 | 0.320791  |
| 15               | 6                | 0              | -0.253900               | -0.033094 | 0.153539  |
| 16               | 1                | 0              | 1.418038                | 1.331652  | -0.214622 |
| 17               | 1                | 0              | -4.755768               | 1.013533  | -0.361089 |
| 18               | 1                | 0              | -1.240275               | -3.548074 | 0.596612  |
| 19               | 1                | 0              | -5.478234               | -2.917257 | -1.430065 |
| 20               | 8                | 0              | 0.105004                | 2.825883  | 0.153268  |
| 21               | 1                | 0              | -4.696894               | 4.396847  | 0.314476  |
| 22               | 1                | 0              | -5.611468               | 3.180630  | -0.585996 |
| 23               | 1                | 0              | -4.517457               | 4.278093  | -1.435988 |
| 24               | 8                | 0              | 0.324595                | -2.338919 | 0.535868  |
| 25               | 1                | 0              | -4.072163               | -2.198279 | -2.229029 |
| 26               | 1                | 0              | -3.849876               | -3.495663 | -1.044488 |
| 27               | 8                | 0              | -2.111248               | -3.159752 | 0.437511  |
| 28               | 1                | 0              | -5.037313               | -0.764450 | -0.462696 |
| 29               | 1                | 0              | -5.899925               | -2.481258 | 1.053749  |
| 30               | 1                | 0              | -4.867257               | -1.344203 | 1.937542  |
| 31               | 1                | 0              | -4.251518               | -2.948417 | 1.503872  |
| 32               | 1                | 0              | 1.223735                | -1.884615 | 0.595047  |
| 33               | 1                | 0              | 0.047469                | 3.784674  | 0.179308  |
| 34               | 7                | 0              | 2.068770                | -0.550739 | 0.347689  |
| 35               | 7                | 0              | 3.430089                | -0.262555 | 0.307236  |
| 36               | 6                | 0              | 4.049570                | -1.161763 | -0.695126 |
| 37               | 6                | 0              | 3.810014                | 1.158836  | 0.228268  |
| 38               | 6                | 0              | 5.566724                | -1.012167 | -0.682475 |
| 39               | 1                | 0              | 3.682517                | -0.867784 | -1.695302 |
| 40               | 6                | 0              | 5.336507                | 1.283010  | 0.197738  |
| 41               | 1                | 0              | 3.416023                | 1.614949  | -0.697808 |
| 42               | 6                | 0              | 5.978415                | 0.436922  | -0.889937 |
| 43               | 1                | 0              | 5.979970                | -1.655941 | -1.463098 |
| 44               | 1                | 0              | 5.946075                | -1.374769 | 0.279945  |
| 45               | 1                | 0              | 5.583434                | 2.340469  | 0.072792  |
| 46               | 1                | 0              | 5.722624                | 0.970668  | 1.174789  |
| 47               | 1                | 0              | 7.065586                | 0.542489  | -0.866247 |
| 48               | 1                | 0              | 5.640572                | 0.777696  | -1.875657 |
| 49               | 6                | 0              | 3.306384                | 1.920571  | 1.460131  |
| 50               | 1                | 0              | 3.781404                | 2.903611  | 1.489708  |
| 51               | 1                | 0              | 2.229499                | 2.071083  | 1.492735  |
| 52               | 1                | 0              | 3.602659                | 1.368580  | 2.354782  |
| 53               | 6                | 0              | 3.660694                | -2.614478 | -0.431908 |
| 54               | 1                | 0              | 3.827429                | -2.852455 | 0.621798  |
| 55               | 1                | 0              | 2.620805                | -2.821793 | -0.678641 |
| 56               | 1                | 0              | 4.287656                | -3.270023 | -1.039583 |
| 57               | 1                | 0              | -2.015519               | 4.257665  | -0.208517 |

### Structure 21c (CHCl<sub>3</sub>)

Energy (Hartrees): = -1191.4115246

No imaginary frequencies

Standard orientation:

| Center<br>Number | Atomic<br>Number | Atomic<br>Type | Coordinates (Angstroms) |           |           |
|------------------|------------------|----------------|-------------------------|-----------|-----------|
|                  |                  |                | X                       | Y         | Z         |
| 1                | 6                | 0              | -4.450665               | -2.603337 | -1.289342 |



|    |   |   |           |           |           |
|----|---|---|-----------|-----------|-----------|
| 2  | 6 | 0 | -4.644679 | 3.697774  | -0.547848 |
| 3  | 6 | 0 | 1.168738  | 0.330578  | 0.089165  |
| 4  | 6 | 0 | -2.205280 | 3.191768  | -0.192083 |
| 5  | 6 | 0 | -3.519742 | 2.717087  | -0.353743 |
| 6  | 6 | 0 | -3.736624 | 1.363833  | -0.308077 |
| 7  | 6 | 0 | -2.681371 | 0.427660  | -0.121872 |
| 8  | 6 | 0 | -1.336910 | 0.907292  | -0.008595 |
| 9  | 6 | 0 | -1.156702 | 2.324722  | -0.010996 |
| 10 | 6 | 0 | -4.362855 | -1.563104 | -0.163455 |
| 11 | 6 | 0 | -4.872540 | -2.127709 | 1.169556  |
| 12 | 6 | 0 | -2.962742 | -0.983777 | -0.021000 |
| 13 | 6 | 0 | -1.919040 | -1.829294 | 0.255061  |
| 14 | 6 | 0 | -0.576768 | -1.368099 | 0.324517  |
| 15 | 6 | 0 | -0.254464 | -0.031913 | 0.161306  |
| 16 | 1 | 0 | 1.418275  | 1.334990  | -0.210935 |
| 17 | 1 | 0 | -4.755063 | 1.017048  | -0.399254 |
| 18 | 1 | 0 | -1.246624 | -3.562250 | 0.593791  |
| 19 | 1 | 0 | -5.493068 | -2.901225 | -1.432965 |
| 20 | 8 | 0 | 0.098964  | 2.820238  | 0.201057  |
| 21 | 1 | 0 | -4.693998 | 4.404717  | 0.284783  |
| 22 | 1 | 0 | -5.605318 | 3.186300  | -0.619845 |
| 23 | 1 | 0 | -4.499469 | 4.280090  | -1.462126 |
| 24 | 8 | 0 | 0.329261  | -2.335372 | 0.539271  |
| 25 | 1 | 0 | -4.086598 | -2.186902 | -2.232089 |
| 26 | 1 | 0 | -3.868200 | -3.495152 | -1.059192 |
| 27 | 8 | 0 | -2.113187 | -3.160621 | 0.435279  |
| 28 | 1 | 0 | -5.042001 | -0.762579 | -0.445759 |
| 29 | 1 | 0 | -5.901142 | -2.482055 | 1.059039  |
| 30 | 1 | 0 | -4.859567 | -1.359134 | 1.946649  |
| 31 | 1 | 0 | -4.256169 | -2.964771 | 1.501049  |
| 32 | 1 | 0 | 1.229995  | -1.874314 | 0.590958  |
| 33 | 1 | 0 | 0.054348  | 3.783405  | 0.231657  |
| 34 | 7 | 0 | 2.068007  | -0.549030 | 0.351004  |
| 35 | 7 | 0 | 3.431029  | -0.265988 | 0.314181  |
| 36 | 6 | 0 | 4.047510  | -1.168985 | -0.692389 |
| 37 | 6 | 0 | 3.810720  | 1.158152  | 0.224624  |
| 38 | 6 | 0 | 5.564033  | -1.015038 | -0.690224 |
| 39 | 1 | 0 | 3.672989  | -0.874580 | -1.688416 |
| 40 | 6 | 0 | 5.336381  | 1.286272  | 0.175718  |
| 41 | 1 | 0 | 3.402890  | 1.605929  | -0.697781 |
| 42 | 6 | 0 | 5.969481  | 0.433680  | -0.911807 |
| 43 | 1 | 0 | 5.971288  | -1.663331 | -1.470175 |
| 44 | 1 | 0 | 5.952944  | -1.370209 | 0.271517  |
| 45 | 1 | 0 | 5.575557  | 2.344118  | 0.039000  |
| 46 | 1 | 0 | 5.736485  | 0.983853  | 1.150475  |
| 47 | 1 | 0 | 7.056726  | 0.541219  | -0.896090 |
| 48 | 1 | 0 | 5.622827  | 0.766117  | -1.897324 |
| 49 | 6 | 0 | 3.321369  | 1.924105  | 1.457706  |
| 50 | 1 | 0 | 3.743180  | 2.931826  | 1.439796  |
| 51 | 1 | 0 | 2.240042  | 2.022483  | 1.535498  |
| 52 | 1 | 0 | 3.683041  | 1.417429  | 2.355814  |
| 53 | 6 | 0 | 3.662522  | -2.621389 | -0.425828 |
| 54 | 1 | 0 | 3.833170  | -2.866190 | 0.626358  |
| 55 | 1 | 0 | 2.622838  | -2.833620 | -0.672836 |
| 56 | 1 | 0 | 4.287907  | -3.275326 | -1.037605 |
| 57 | 1 | 0 | -2.013083 | 4.261628  | -0.187504 |

### Structure 21c (DMSO)

Energy (Hartrees): = -1191.4053048  
No imaginary frequencies

Standard orientation:

| Center Number | Atomic Number | Atomic Type | Coordinates (Angstroms) |           |           |
|---------------|---------------|-------------|-------------------------|-----------|-----------|
|               |               |             | X                       | Y         | Z         |
| 1             | 6             | 0           | -4.456589               | -2.606257 | -1.274611 |
| 2             | 6             | 0           | -4.658676               | 3.689344  | -0.533705 |
| 3             | 6             | 0           | 1.170722                | 0.334254  | 0.082120  |
| 4             | 6             | 0           | -2.214709               | 3.190792  | -0.205476 |
| 5             | 6             | 0           | -3.529770               | 2.712193  | -0.349270 |
| 6             | 6             | 0           | -3.743649               | 1.357998  | -0.297135 |
| 7             | 6             | 0           | -2.683616               | 0.425484  | -0.118396 |
| 8             | 6             | 0           | -1.338536               | 0.908438  | -0.018276 |
| 9             | 6             | 0           | -1.161552               | 2.326990  | -0.032941 |
| 10            | 6             | 0           | -4.363438               | -1.565769 | -0.150062 |
| 11            | 6             | 0           | -4.866974               | -2.130184 | 1.184656  |
| 12            | 6             | 0           | -2.962652               | -0.986804 | -0.014957 |
| 13            | 6             | 0           | -1.915608               | -1.830499 | 0.254364  |
| 14            | 6             | 0           | -0.573159               | -1.366398 | 0.313557  |
| 15            | 6             | 0           | -0.253217               | -0.029045 | 0.149294  |
| 16            | 1             | 0           | 1.424742                | 1.340765  | -0.205836 |
| 17            | 1             | 0           | -4.762629               | 1.009767  | -0.377372 |
| 18            | 1             | 0           | -1.232173               | -3.555617 | 0.590707  |

|    |   |   |           |           |           |
|----|---|---|-----------|-----------|-----------|
| 19 | 1 | 0 | -5.499719 | -2.904404 | -1.411265 |
| 20 | 8 | 0 | 0.094030  | 2.827398  | 0.155663  |
| 21 | 1 | 0 | -4.705291 | 4.391852  | 0.302784  |
| 22 | 1 | 0 | -5.617316 | 3.174052  | -0.605336 |
| 23 | 1 | 0 | -4.516309 | 4.278109  | -1.444182 |
| 24 | 8 | 0 | 0.335091  | -2.331324 | 0.522323  |
| 25 | 1 | 0 | -4.099960 | -2.189733 | -2.220406 |
| 26 | 1 | 0 | -3.872302 | -3.497994 | -1.048247 |
| 27 | 8 | 0 | -2.103101 | -3.162290 | 0.437191  |
| 28 | 1 | 0 | -5.044584 | -0.766254 | -0.429217 |
| 29 | 1 | 0 | -5.897411 | -2.480294 | 1.078499  |
| 30 | 1 | 0 | -4.848658 | -1.362460 | 1.962773  |
| 31 | 1 | 0 | -4.252345 | -2.970212 | 1.512571  |
| 32 | 1 | 0 | 1.237792  | -1.865924 | 0.559702  |
| 33 | 1 | 0 | 0.048656  | 3.792068  | 0.155544  |
| 34 | 7 | 0 | 2.067829  | -0.550261 | 0.336528  |
| 35 | 7 | 0 | 3.431262  | -0.269402 | 0.313586  |
| 36 | 6 | 0 | 4.054215  | -1.158958 | -0.703012 |
| 37 | 6 | 0 | 3.812948  | 1.157010  | 0.244320  |
| 38 | 6 | 0 | 5.570424  | -1.006508 | -0.687361 |
| 39 | 1 | 0 | 3.686516  | -0.848143 | -1.695830 |
| 40 | 6 | 0 | 5.338756  | 1.282968  | 0.209224  |
| 41 | 1 | 0 | 3.412433  | 1.615248  | -0.675126 |
| 42 | 6 | 0 | 5.978486  | 0.444634  | -0.885066 |
| 43 | 1 | 0 | 5.981366  | -1.643992 | -1.474188 |
| 44 | 1 | 0 | 5.953124  | -1.376157 | 0.271696  |
| 45 | 1 | 0 | 5.578719  | 2.342336  | 0.088307  |
| 46 | 1 | 0 | 5.732382  | 0.967493  | 1.182742  |
| 47 | 1 | 0 | 7.065768  | 0.550420  | -0.859593 |
| 48 | 1 | 0 | 5.638532  | 0.790939  | -1.867983 |
| 49 | 6 | 0 | 3.315711  | 1.907658  | 1.483131  |
| 50 | 1 | 0 | 3.740196  | 2.914235  | 1.481020  |
| 51 | 1 | 0 | 2.233967  | 2.010569  | 1.552525  |
| 52 | 1 | 0 | 3.668232  | 1.389882  | 2.379021  |
| 53 | 6 | 0 | 3.666611  | -2.614387 | -0.460421 |
| 54 | 1 | 0 | 3.830868  | -2.876913 | 0.588796  |
| 55 | 1 | 0 | 2.628627  | -2.822905 | -0.718037 |
| 56 | 1 | 0 | 4.296102  | -3.258416 | -1.078387 |
| 57 | 1 | 0 | -2.025497 | 4.261345  | -0.207768 |

### Structure 21d (vacuum)

Energy (Hartrees): = -1191.3797528

Imaginary frequency -24.26

Standard orientation:

| Center<br>Number | Atomic<br>Number | Atomic<br>Type | Coordinates (Angstroms) |           |           |
|------------------|------------------|----------------|-------------------------|-----------|-----------|
|                  |                  |                | X                       | Y         | Z         |
| 1                | 6                | 0              | 4.664015                | -2.246219 | 1.360856  |
| 2                | 6                | 0              | 4.302073                | 3.969148  | 0.106024  |
| 3                | 6                | 0              | -1.217608               | 0.065244  | -0.001997 |
| 4                | 6                | 0              | 1.896413                | 3.237269  | -0.005496 |
| 5                | 6                | 0              | 3.255092                | 2.888518  | 0.067609  |
| 6                | 6                | 0              | 3.584894                | 1.558063  | 0.085249  |
| 7                | 6                | 0              | 2.607621                | 0.528652  | 0.039908  |
| 8                | 6                | 0              | 1.225027                | 0.883892  | -0.020477 |
| 9                | 6                | 0              | 0.919446                | 2.274745  | -0.059238 |
| 10               | 6                | 0              | 4.452660                | -1.304132 | 0.166175  |
| 11               | 6                | 0              | 4.969006                | -1.919985 | -1.141366 |
| 12               | 6                | 0              | 3.005057                | -0.859754 | 0.032242  |
| 13               | 6                | 0              | 2.033637                | -1.809847 | -0.132915 |
| 14               | 6                | 0              | 0.651867                | -1.470189 | -0.198655 |
| 15               | 6                | 0              | 0.223948                | -0.153787 | -0.097025 |
| 16               | 1                | 0              | -1.578325               | 1.054443  | 0.248263  |
| 17               | 1                | 0              | 4.633630                | 1.303448  | 0.112349  |
| 18               | 1                | 0              | 1.491428                | -3.601028 | -0.301742 |
| 19               | 1                | 0              | 5.732883                | -2.433641 | 1.491753  |
| 20               | 8                | 0              | -0.392957               | 2.650979  | -0.173615 |
| 21               | 1                | 0              | 4.273546                | 4.573144  | -0.804791 |
| 22               | 1                | 0              | 5.301621                | 3.544094  | 0.200001  |
| 23               | 1                | 0              | 4.137354                | 4.641389  | 0.951893  |
| 24               | 8                | 0              | -0.164659               | -2.517127 | -0.319819 |
| 25               | 1                | 0              | 4.282979                | -1.795282 | 2.279835  |
| 26               | 1                | 0              | 4.163179                | -3.200843 | 1.209902  |
| 27               | 8                | 0              | 2.331996                | -3.130335 | -0.216410 |
| 28               | 1                | 0              | 5.063751                | -0.428386 | 0.372011  |
| 29               | 1                | 0              | 6.024394                | -2.185461 | -1.039489 |
| 30               | 1                | 0              | 4.871399                | -1.211467 | -1.967106 |
| 31               | 1                | 0              | 4.408441                | -2.821794 | -1.390016 |
| 32               | 1                | 0              | -1.120427               | -2.146679 | -0.321884 |
| 33               | 1                | 0              | -0.430431               | 3.607999  | -0.249974 |
| 34               | 7                | 0              | -2.035152               | -0.910662 | -0.175785 |
| 35               | 7                | 0              | -3.437781               | -0.650602 | -0.021077 |
| 36               | 6                | 0              | -3.761511               | -0.058164 | 1.290807  |

|    |   |   |           |           |           |
|----|---|---|-----------|-----------|-----------|
| 37 | 6 | 0 | -3.926765 | 0.125302  | -1.176635 |
| 38 | 6 | 0 | -5.279233 | 0.076280  | 1.402775  |
| 39 | 1 | 0 | -3.332445 | 0.955223  | 1.388970  |
| 40 | 6 | 0 | -5.441087 | 0.291612  | -1.067759 |
| 41 | 1 | 0 | -3.462577 | 1.130435  | -1.174232 |
| 42 | 6 | 0 | -5.850519 | 0.910368  | 0.262941  |
| 43 | 1 | 0 | -5.517671 | 0.520848  | 2.372933  |
| 44 | 1 | 0 | -5.714404 | -0.929112 | 1.381588  |
| 45 | 1 | 0 | -5.783547 | 0.902368  | -1.907663 |
| 46 | 1 | 0 | -5.899240 | -0.698448 | -1.171357 |
| 47 | 1 | 0 | -6.938554 | 0.976679  | 0.339188  |
| 48 | 1 | 0 | -5.460008 | 1.933039  | 0.327957  |
| 49 | 6 | 0 | -3.567613 | -0.586473 | -2.477157 |
| 50 | 1 | 0 | -4.035187 | -0.071420 | -3.318967 |
| 51 | 1 | 0 | -2.491835 | -0.617246 | -2.645960 |
| 52 | 1 | 0 | -3.939811 | -1.613045 | -2.442486 |
| 53 | 6 | 0 | -3.224777 | -0.944498 | 2.410044  |
| 54 | 1 | 0 | -3.603479 | -1.960790 | 2.278805  |
| 55 | 1 | 0 | -2.135667 | -0.985067 | 2.424029  |
| 56 | 1 | 0 | -3.564755 | -0.564698 | 3.375715  |
| 57 | 1 | 0 | 1.609400  | 4.285726  | -0.038202 |

### Structure 21d (CHCl<sub>3</sub>)

Energy (Hartrees): = -1191.4067223

Imaginary frequency -36.16

Standard orientation:

| Center<br>Number | Atomic<br>Number | Atomic<br>Type | Coordinates (Angstroms) |           |           |
|------------------|------------------|----------------|-------------------------|-----------|-----------|
|                  |                  |                | X                       | Y         | Z         |
| 1                | 6                | 0              | 4.647484                | -2.213622 | 1.399303  |
| 2                | 6                | 0              | 4.287989                | 3.976178  | 0.178044  |
| 3                | 6                | 0              | -1.214738               | 0.071844  | -0.029086 |
| 4                | 6                | 0              | 1.891847                | 3.241440  | -0.042696 |
| 5                | 6                | 0              | 3.247502                | 2.892513  | 0.090128  |
| 6                | 6                | 0              | 3.582874                | 1.561848  | 0.116696  |
| 7                | 6                | 0              | 2.608691                | 0.530032  | 0.030522  |
| 8                | 6                | 0              | 1.227728                | 0.885559  | -0.062788 |
| 9                | 6                | 0              | 0.918884                | 2.276383  | -0.131849 |
| 10               | 6                | 0              | 4.450199                | -1.306363 | 0.176259  |
| 11               | 6                | 0              | 4.979011                | -1.961460 | -1.106619 |
| 12               | 6                | 0              | 3.004144                | -0.859928 | 0.021799  |
| 13               | 6                | 0              | 2.032394                | -1.809367 | -0.156738 |
| 14               | 6                | 0              | 0.652082                | -1.467937 | -0.242330 |
| 15               | 6                | 0              | 0.226345                | -0.150483 | -0.149584 |
| 16               | 1                | 0              | -1.568598               | 1.053549  | 0.259004  |
| 17               | 1                | 0              | 4.631117                | 1.311919  | 0.186602  |
| 18               | 1                | 0              | 1.500056                | -3.614429 | -0.318145 |
| 19               | 1                | 0              | 5.713215                | -2.415434 | 1.537733  |
| 20               | 8                | 0              | -0.384495               | 2.637876  | -0.315307 |
| 21               | 1                | 0              | 4.281191                | 4.597724  | -0.721736 |
| 22               | 1                | 0              | 5.287161                | 3.554304  | 0.293242  |
| 23               | 1                | 0              | 4.093463                | 4.633137  | 1.030099  |
| 24               | 8                | 0              | -0.170258               | -2.511163 | -0.365221 |
| 25               | 1                | 0              | 4.276554                | -1.730135 | 2.306570  |
| 26               | 1                | 0              | 4.132103                | -3.166401 | 1.281306  |
| 27               | 8                | 0              | 2.333981                | -3.130256 | -0.227851 |
| 28               | 1                | 0              | 5.064982                | -0.428211 | 0.356403  |
| 29               | 1                | 0              | 6.036444                | -2.213421 | -0.988408 |
| 30               | 1                | 0              | 4.885773                | -1.280957 | -1.956756 |
| 31               | 1                | 0              | 4.431684                | -2.876585 | -1.336206 |
| 32               | 1                | 0              | -1.124712               | -2.130456 | -0.366923 |
| 33               | 1                | 0              | -0.435552               | 3.597052  | -0.405141 |
| 34               | 7                | 0              | -2.034956               | -0.899190 | -0.212069 |
| 35               | 7                | 0              | -3.435355               | -0.655280 | -0.011928 |
| 36               | 6                | 0              | -3.724690               | -0.060056 | 1.310984  |
| 37               | 6                | 0              | -3.960587               | 0.123256  | -1.153951 |
| 38               | 6                | 0              | -5.239149               | 0.066834  | 1.464885  |
| 39               | 1                | 0              | -3.298245               | 0.953823  | 1.393283  |
| 40               | 6                | 0              | -5.471121               | 0.289363  | -1.001553 |
| 41               | 1                | 0              | -3.493736               | 1.125833  | -1.158494 |
| 42               | 6                | 0              | -5.844878               | 0.900935  | 0.342888  |
| 43               | 1                | 0              | -5.449249               | 0.511063  | 2.441766  |
| 44               | 1                | 0              | -5.672978               | -0.939827 | 1.457209  |
| 45               | 1                | 0              | -5.833402               | 0.907143  | -1.827933 |
| 46               | 1                | 0              | -5.936381               | -0.698330 | -1.100206 |
| 47               | 1                | 0              | -6.930972               | 0.959953  | 0.449201  |
| 48               | 1                | 0              | -5.457814               | 1.925250  | 0.400690  |
| 49               | 6                | 0              | -3.637502               | -0.583822 | -2.465909 |
| 50               | 1                | 0              | -4.133337               | -0.068050 | -3.291594 |
| 51               | 1                | 0              | -2.566985               | -0.606041 | -2.671502 |
| 52               | 1                | 0              | -4.002845               | -1.613749 | -2.429045 |
| 53               | 6                | 0              | -3.151252               | -0.941416 | 2.414775  |
| 54               | 1                | 0              | -3.521945               | -1.963502 | 2.299138  |

|    |   |   |           |           |           |
|----|---|---|-----------|-----------|-----------|
| 55 | 1 | 0 | -2.060734 | -0.969948 | 2.405772  |
| 56 | 1 | 0 | -3.470711 | -0.564142 | 3.388902  |
| 57 | 1 | 0 | 1.603266  | 4.288102  | -0.098892 |

### Structure 21d (DMSO)

Energy (Hartrees): = -1191.4009163  
Imaginary frequency -37.02

Standard orientation:

| Center Number | Atomic Number | Atomic Type | Coordinates (Angstroms) |           |           |
|---------------|---------------|-------------|-------------------------|-----------|-----------|
|               |               |             | X                       | Y         | Z         |
| 1             | 6             | 0           | 4.651709                | -2.230064 | 1.385657  |
| 2             | 6             | 0           | 4.299705                | 3.968278  | 0.157731  |
| 3             | 6             | 0           | -1.216015               | 0.075888  | -0.007167 |
| 4             | 6             | 0           | 1.899578                | 3.240444  | -0.034576 |
| 5             | 6             | 0           | 3.255704                | 2.887704  | 0.084868  |
| 6             | 6             | 0           | 3.589045                | 1.555794  | 0.111557  |
| 7             | 6             | 0           | 2.610731                | 0.526677  | 0.036801  |
| 8             | 6             | 0           | 1.229546                | 0.885471  | -0.045986 |
| 9             | 6             | 0           | 0.922948                | 2.277507  | -0.111434 |
| 10            | 6             | 0           | 4.450098                | -1.310919 | 0.173053  |
| 11            | 6             | 0           | 4.976727                | -1.952079 | -1.116994 |
| 12            | 6             | 0           | 3.003637                | -0.864415 | 0.025804  |
| 13            | 6             | 0           | 2.028954                | -1.811170 | -0.151771 |
| 14            | 6             | 0           | 0.648700                | -1.466499 | -0.229209 |
| 15            | 6             | 0           | 0.225487                | -0.148622 | -0.128481 |
| 16            | 1             | 0           | -1.571892               | 1.052952  | 0.293885  |
| 17            | 1             | 0           | 4.637698                | 1.304382  | 0.171396  |
| 18            | 1             | 0           | 1.487046                | -3.608453 | -0.323172 |
| 19            | 1             | 0           | 5.718708                | -2.427402 | 1.520272  |
| 20            | 8             | 0           | -0.379627               | 2.641607  | -0.281648 |
| 21            | 1             | 0           | 4.289058                | 4.581698  | -0.747543 |
| 22            | 1             | 0           | 5.297822                | 3.543631  | 0.272681  |
| 23            | 1             | 0           | 4.108878                | 4.634536  | 1.003291  |
| 24            | 8             | 0           | -0.176824               | -2.506664 | -0.355165 |
| 25            | 1             | 0           | 4.280811                | -1.757245 | 2.298785  |
| 26            | 1             | 0           | 4.140860                | -3.184314 | 1.259038  |
| 27            | 8             | 0           | 2.325092                | -3.132680 | -0.231823 |
| 28            | 1             | 0           | 5.064759                | -0.434642 | 0.361383  |
| 29            | 1             | 0           | 6.034514                | -2.203889 | -1.002398 |
| 30            | 1             | 0           | 4.883185                | -1.261687 | -1.959415 |
| 31            | 1             | 0           | 4.429682                | -2.865258 | -1.356605 |
| 32            | 1             | 0           | -1.129436               | -2.115189 | -0.359862 |
| 33            | 1             | 0           | -0.430092               | 3.603990  | -0.343111 |
| 34            | 7             | 0           | -2.034733               | -0.892787 | -0.208183 |
| 35            | 7             | 0           | -3.437226               | -0.656050 | -0.015853 |
| 36            | 6             | 0           | -3.737526               | -0.056662 | 1.304821  |
| 37            | 6             | 0           | -3.954951               | 0.128822  | -1.159714 |
| 38            | 6             | 0           | -5.253705               | 0.058727  | 1.448152  |
| 39            | 1             | 0           | -3.318840               | 0.959590  | 1.382391  |
| 40            | 6             | 0           | -5.467496               | 0.284625  | -1.020811 |
| 41            | 1             | 0           | -3.493163               | 1.132641  | -1.148520 |
| 42            | 6             | 0           | -5.857369               | 0.888565  | 0.322205  |
| 43            | 1             | 0           | -5.472781               | 0.502471  | 2.423137  |
| 44            | 1             | 0           | -5.681281               | -0.950939 | 1.439258  |
| 45            | 1             | 0           | -5.824599               | 0.904179  | -1.847968 |
| 46            | 1             | 0           | -5.926569               | -0.705301 | -1.129275 |
| 47            | 1             | 0           | -6.944841               | 0.937337  | 0.419458  |
| 48            | 1             | 0           | -5.478851               | 1.915543  | 0.385153  |
| 49            | 6             | 0           | -3.615038               | -0.566081 | -2.473546 |
| 50            | 1             | 0           | -4.109356               | -0.047983 | -3.298589 |
| 51            | 1             | 0           | -2.542682               | -0.576664 | -2.671989 |
| 52            | 1             | 0           | -3.972568               | -1.599585 | -2.449244 |
| 53            | 6             | 0           | -3.164202               | -0.929468 | 2.414638  |
| 54            | 1             | 0           | -3.527598               | -1.955156 | 2.303245  |
| 55            | 1             | 0           | -2.073191               | -0.948949 | 2.412826  |
| 56            | 1             | 0           | -3.492160               | -0.549694 | 3.384913  |
| 57            | 1             | 0           | 1.613861                | 4.288009  | -0.089680 |

### Structure 21e (vacuum)

Energy (Hartrees): = -1191.3788168  
Imaginary frequency -151.98

Standard orientation:

| Center Number | Atomic Number | Atomic Type | Coordinates (Angstroms) |           |           |
|---------------|---------------|-------------|-------------------------|-----------|-----------|
|               |               |             | X                       | Y         | Z         |
| 1             | 6             | 0           | -4.606563               | -2.634654 | -0.952929 |
| 2             | 6             | 0           | -4.970558               | 3.475301  | -0.047544 |
| 3             | 6             | 0           | 1.114201                | 0.516214  | -0.211778 |

|    |   |   |           |           |           |
|----|---|---|-----------|-----------|-----------|
| 4  | 6 | 0 | -2.480616 | 3.130600  | -0.183398 |
| 5  | 6 | 0 | -3.765321 | 2.574034  | -0.068351 |
| 6  | 6 | 0 | -3.873206 | 1.212734  | 0.024644  |
| 7  | 6 | 0 | -2.743075 | 0.350074  | 0.011822  |
| 8  | 6 | 0 | -1.430751 | 0.914934  | -0.107928 |
| 9  | 6 | 0 | -1.360754 | 2.338618  | -0.203912 |
| 10 | 6 | 0 | -4.282699 | -1.740616 | 0.252565  |
| 11 | 6 | 0 | -4.409618 | -2.503537 | 1.579253  |
| 12 | 6 | 0 | -2.921566 | -1.076156 | 0.110629  |
| 13 | 6 | 0 | -1.803870 | -1.867078 | 0.074211  |
| 14 | 6 | 0 | -0.499819 | -1.319636 | -0.051799 |
| 15 | 6 | 0 | -0.277070 | 0.044776  | -0.130083 |
| 16 | 1 | 0 | 1.281200  | 1.573577  | -0.260877 |
| 17 | 1 | 0 | -4.864994 | 0.796180  | 0.108250  |
| 18 | 1 | 0 | -0.980520 | -3.556694 | 0.113039  |
| 19 | 1 | 0 | -5.616189 | -3.041482 | -0.852036 |
| 20 | 8 | 0 | -0.133263 | 2.938473  | -0.327555 |
| 21 | 1 | 0 | -4.947334 | 4.136642  | 0.822749  |
| 22 | 1 | 0 | -5.893422 | 2.896151  | -0.008560 |
| 23 | 1 | 0 | -5.001396 | 4.106096  | -0.939680 |
| 24 | 8 | 0 | 0.476714  | -2.243470 | -0.062669 |
| 25 | 1 | 0 | -4.560583 | -2.060650 | -1.881179 |
| 26 | 1 | 0 | -3.905759 | -3.465995 | -1.024251 |
| 27 | 8 | 0 | -1.885440 | -3.219685 | 0.156098  |
| 28 | 1 | 0 | -5.047669 | -0.968548 | 0.275403  |
| 29 | 1 | 0 | -5.425413 | -2.893077 | 1.685743  |
| 30 | 1 | 0 | -4.207386 | -1.841166 | 2.423978  |
| 31 | 1 | 0 | -3.713808 | -3.340619 | 1.621490  |
| 32 | 1 | 0 | 1.343806  | -1.732197 | -0.111594 |
| 33 | 1 | 0 | -0.269012 | 3.883079  | -0.438425 |
| 34 | 7 | 0 | 2.079379  | -0.330059 | -0.247900 |
| 35 | 7 | 0 | 3.417265  | 0.018832  | -0.323432 |
| 36 | 6 | 0 | 3.823036  | 1.156997  | 0.545143  |
| 37 | 6 | 0 | 4.160805  | -1.263602 | -0.183485 |
| 38 | 6 | 0 | 5.345919  | 1.233665  | 0.706024  |
| 39 | 1 | 0 | 3.371024  | 0.995465  | 1.537379  |
| 40 | 6 | 0 | 5.664934  | -1.062862 | -0.070376 |
| 41 | 1 | 0 | 3.816221  | -1.760040 | 0.738633  |
| 42 | 6 | 0 | 6.001071  | -0.091476 | 1.046654  |
| 43 | 1 | 0 | 5.545283  | 1.988827  | 1.470819  |
| 44 | 1 | 0 | 5.771099  | 1.610119  | -0.232159 |
| 45 | 1 | 0 | 6.120478  | -2.042750 | 0.093185  |
| 46 | 1 | 0 | 6.051256  | -0.678672 | -1.021746 |
| 47 | 1 | 0 | 7.081407  | 0.032721  | 1.152078  |
| 48 | 1 | 0 | 5.620110  | -0.472014 | 2.001332  |
| 49 | 6 | 0 | 3.854204  | -2.155172 | -1.384528 |
| 50 | 1 | 0 | 2.794636  | -2.388327 | -1.475630 |
| 51 | 1 | 0 | 4.170545  | -1.648499 | -2.299388 |
| 52 | 1 | 0 | 4.404466  | -3.094655 | -1.296005 |
| 53 | 6 | 0 | 3.370579  | 2.520685  | -0.017738 |
| 54 | 1 | 0 | 3.297051  | 2.462434  | -1.105901 |
| 55 | 1 | 0 | 2.419218  | 2.866777  | 0.383197  |
| 56 | 1 | 0 | 4.114963  | 3.280857  | 0.228597  |
| 57 | 1 | 0 | -2.365456 | 4.209440  | -0.258679 |

### Structure 21e (CHCl<sub>3</sub>)

Energy (Hartrees): = -1191.4054445  
Imaginary frequency -152.46

Standard orientation:

| Center Number | Atomic Number | Atomic Type | Coordinates (Angstroms) |           |           |
|---------------|---------------|-------------|-------------------------|-----------|-----------|
|               |               |             | X                       | Y         | Z         |
| 1             | 6             | 0           | -4.594856               | -2.687534 | -0.889330 |
| 2             | 6             | 0           | -4.983101               | 3.457762  | 0.026734  |
| 3             | 6             | 0           | 1.109788                | 0.543564  | -0.222792 |
| 4             | 6             | 0           | -2.505736               | 3.120319  | -0.258931 |
| 5             | 6             | 0           | -3.778017               | 2.560059  | -0.046921 |
| 6             | 6             | 0           | -3.877719               | 1.198526  | 0.075132  |
| 7             | 6             | 0           | -2.744226               | 0.340095  | 0.013272  |
| 8             | 6             | 0           | -1.441201               | 0.911957  | -0.160137 |
| 9             | 6             | 0           | -1.383325               | 2.332453  | -0.321452 |
| 10            | 6             | 0           | -4.262540               | -1.760989 | 0.288908  |
| 11            | 6             | 0           | -4.373725               | -2.491069 | 1.634356  |
| 12            | 6             | 0           | -2.907285               | -1.088735 | 0.121142  |
| 13            | 6             | 0           | -1.782726               | -1.870654 | 0.064263  |
| 14            | 6             | 0           | -0.485227               | -1.313037 | -0.089412 |
| 15            | 6             | 0           | -0.278256               | 0.053744  | -0.181380 |
| 16            | 1             | 0           | 1.270004                | 1.603682  | -0.203624 |
| 17            | 1             | 0           | -4.862122               | 0.781874  | 0.226172  |
| 18            | 1             | 0           | -0.951788               | -3.566786 | 0.108785  |
| 19            | 1             | 0           | -5.609116               | -3.080412 | -0.775642 |
| 20            | 8             | 0           | -0.171776               | 2.916655  | -0.559725 |
| 21            | 1             | 0           | -4.869869               | 4.198752  | 0.822797  |

|    |   |   |           |           |           |
|----|---|---|-----------|-----------|-----------|
| 22 | 1 | 0 | -5.890584 | 2.884706  | 0.220974  |
| 23 | 1 | 0 | -5.119170 | 4.005036  | -0.910263 |
| 24 | 8 | 0 | 0.502971  | -2.223539 | -0.104071 |
| 25 | 1 | 0 | -4.548346 | -2.143062 | -1.835895 |
| 26 | 1 | 0 | -3.905661 | -3.530281 | -0.942918 |
| 27 | 8 | 0 | -1.855182 | -3.223062 | 0.160874  |
| 28 | 1 | 0 | -5.032624 | -0.994214 | 0.293310  |
| 29 | 1 | 0 | -5.381583 | -2.898147 | 1.754454  |
| 30 | 1 | 0 | -4.184656 | -1.805415 | 2.464246  |
| 31 | 1 | 0 | -3.662232 | -3.314748 | 1.699741  |
| 32 | 1 | 0 | 1.365084  | -1.697705 | -0.172758 |
| 33 | 1 | 0 | -0.301291 | 3.861791  | -0.701738 |
| 34 | 7 | 0 | 2.080127  | -0.294569 | -0.287234 |
| 35 | 7 | 0 | 3.418044  | 0.058735  | -0.311693 |
| 36 | 6 | 0 | 3.809413  | 1.124732  | 0.657033  |
| 37 | 6 | 0 | 4.161045  | -1.234085 | -0.251853 |
| 38 | 6 | 0 | 5.330810  | 1.192256  | 0.833518  |
| 39 | 1 | 0 | 3.350556  | 0.873834  | 1.626420  |
| 40 | 6 | 0 | 5.663503  | -1.041047 | -0.110224 |
| 41 | 1 | 0 | 3.806229  | -1.790555 | 0.630736  |
| 42 | 6 | 0 | 5.988047  | -0.153202 | 1.077392  |
| 43 | 1 | 0 | 5.520986  | 1.886737  | 1.655729  |
| 44 | 1 | 0 | 5.761496  | 1.640301  | -0.070163 |
| 45 | 1 | 0 | 6.116468  | -2.030854 | -0.011480 |
| 46 | 1 | 0 | 6.059594  | -0.589359 | -1.027597 |
| 47 | 1 | 0 | 7.067656  | -0.032667 | 1.195950  |
| 48 | 1 | 0 | 5.603758  | -0.604363 | 1.999337  |
| 49 | 6 | 0 | 3.865511  | -2.041634 | -1.512576 |
| 50 | 1 | 0 | 2.808209  | -2.280933 | -1.623427 |
| 51 | 1 | 0 | 4.178874  | -1.474589 | -2.393327 |
| 52 | 1 | 0 | 4.424406  | -2.980225 | -1.486745 |
| 53 | 6 | 0 | 3.354304  | 2.528623  | 0.212614  |
| 54 | 1 | 0 | 3.321317  | 2.585106  | -0.878292 |
| 55 | 1 | 0 | 2.386083  | 2.826350  | 0.612985  |
| 56 | 1 | 0 | 4.076968  | 3.268692  | 0.564002  |
| 57 | 1 | 0 | -2.400845 | 4.195235  | -0.382034 |

### Structure 21e (DMSO)

Energy (Hartrees): = -1191.3992282  
Imaginary frequency -152.93

Standard orientation:

| Center<br>Number | Atomic<br>Number | Atomic<br>Type | Coordinates (Angstroms) |           |           |
|------------------|------------------|----------------|-------------------------|-----------|-----------|
|                  |                  |                | X                       | Y         | Z         |
| 1                | 6                | 0              | -4.599500               | -2.680366 | -0.877799 |
| 2                | 6                | 0              | -5.002475               | 3.442793  | -0.046958 |
| 3                | 6                | 0              | 1.108979                | 0.554869  | -0.186612 |
| 4                | 6                | 0              | -2.517846               | 3.118471  | -0.269299 |
| 5                | 6                | 0              | -3.791643               | 2.551601  | -0.083309 |
| 6                | 6                | 0              | -3.887785               | 1.189863  | 0.048102  |
| 7                | 6                | 0              | -2.748139               | 0.337182  | 0.015264  |
| 8                | 6                | 0              | -1.445022               | 0.914616  | -0.142306 |
| 9                | 6                | 0              | -1.390595               | 2.335458  | -0.305120 |
| 10               | 6                | 0              | -4.258374               | -1.766666 | 0.306914  |
| 11               | 6                | 0              | -4.357720               | -2.510776 | 1.645112  |
| 12               | 6                | 0              | -2.905590               | -1.092028 | 0.132249  |
| 13               | 6                | 0              | -1.778038               | -1.870151 | 0.073859  |
| 14               | 6                | 0              | -0.481830               | -1.307726 | -0.077422 |
| 15               | 6                | 0              | -0.278595               | 0.060503  | -0.157472 |
| 16               | 1                | 0              | 1.267814                | 1.614237  | -0.135325 |
| 17               | 1                | 0              | -4.874549               | 0.770633  | 0.176887  |
| 18               | 1                | 0              | -0.936417               | -3.556979 | 0.111685  |
| 19               | 1                | 0              | -5.607029               | -3.086741 | -0.753117 |
| 20               | 8                | 0              | -0.178706               | 2.924051  | -0.519061 |
| 21               | 1                | 0              | -5.103666               | 3.998109  | -0.983543 |
| 22               | 1                | 0              | -4.920360               | 4.178863  | 0.757452  |
| 23               | 1                | 0              | -5.913874               | 2.864157  | 0.108740  |
| 24               | 8                | 0              | 0.508361                | -2.215000 | -0.098325 |
| 25               | 1                | 0              | -4.576194               | -2.121728 | -1.817226 |
| 26               | 1                | 0              | -3.900894               | -3.513994 | -0.954604 |
| 27               | 8                | 0              | -1.842879               | -3.222741 | 0.167281  |
| 28               | 1                | 0              | -5.028972               | -1.001161 | 0.330231  |
| 29               | 1                | 0              | -5.367019               | -2.912519 | 1.770244  |
| 30               | 1                | 0              | -4.158452               | -1.834598 | 2.480645  |
| 31               | 1                | 0              | -3.651025               | -3.339495 | 1.696609  |
| 32               | 1                | 0              | 1.368459                | -1.684876 | -0.172555 |
| 33               | 1                | 0              | -0.310066               | 3.873247  | -0.637749 |
| 34               | 7                | 0              | 2.079279                | -0.280915 | -0.279673 |
| 35               | 7                | 0              | 3.417166                | 0.070038  | -0.305764 |
| 36               | 6                | 0              | 3.825186                | 1.105045  | 0.691871  |
| 37               | 6                | 0              | 4.160321                | -1.225333 | -0.287739 |
| 38               | 6                | 0              | 5.350045                | 1.177532  | 0.824981  |
| 39               | 1                | 0              | 3.398533                | 0.811458  | 1.663765  |

|    |   |   |           |           |           |
|----|---|---|-----------|-----------|-----------|
| 40 | 6 | 0 | 5.665349  | -1.033549 | -0.176203 |
| 41 | 1 | 0 | 3.824627  | -1.797779 | 0.591550  |
| 42 | 6 | 0 | 6.017719  | -0.170025 | 1.020684  |
| 43 | 1 | 0 | 5.560586  | 1.853335  | 1.657475  |
| 44 | 1 | 0 | 5.752732  | 1.647825  | -0.080400 |
| 45 | 1 | 0 | 6.119982  | -2.025074 | -0.107471 |
| 46 | 1 | 0 | 6.039184  | -0.562613 | -1.093374 |
| 47 | 1 | 0 | 7.099757  | -0.048032 | 1.112388  |
| 48 | 1 | 0 | 5.658792  | -0.642206 | 1.942361  |
| 49 | 6 | 0 | 3.841852  | -2.007473 | -1.558419 |
| 50 | 1 | 0 | 2.783874  | -2.249972 | -1.655718 |
| 51 | 1 | 0 | 4.138313  | -1.422442 | -2.433711 |
| 52 | 1 | 0 | 4.405183  | -2.943603 | -1.561445 |
| 53 | 6 | 0 | 3.346251  | 2.519537  | 0.314081  |
| 54 | 1 | 0 | 3.282724  | 2.621273  | -0.772422 |
| 55 | 1 | 0 | 2.387731  | 2.791411  | 0.753770  |
| 56 | 1 | 0 | 4.071907  | 3.251442  | 0.675838  |
| 57 | 1 | 0 | -2.416310 | 4.193238  | -0.398835 |

### Structure 21f (vacuum)

Energy (Hartrees): = -1191.3788168

Imaginary frequency -151.93

Standard orientation:

| Center<br>Number | Atomic<br>Number | Atomic<br>Type | Coordinates (Angstroms) |           |           |
|------------------|------------------|----------------|-------------------------|-----------|-----------|
|                  |                  |                | X                       | Y         | Z         |
| 1                | 6                | 0              | 4.409594                | -2.503837 | 1.579126  |
| 2                | 6                | 0              | 4.970590                | 3.475288  | -0.048216 |
| 3                | 6                | 0              | -1.114197               | 0.516219  | -0.211654 |
| 4                | 6                | 0              | 2.480594                | 3.130626  | -0.183160 |
| 5                | 6                | 0              | 3.765332                | 2.574038  | -0.068607 |
| 6                | 6                | 0              | 3.873233                | 1.212735  | 0.024315  |
| 7                | 6                | 0              | 2.743088                | 0.350090  | 0.011837  |
| 8                | 6                | 0              | 1.430745                | 0.914956  | -0.107677 |
| 9                | 6                | 0              | 1.360721                | 2.338653  | -0.203427 |
| 10               | 6                | 0              | 4.282716                | -1.740598 | 0.252613  |
| 11               | 6                | 0              | 4.606619                | -2.634364 | -0.953070 |
| 12               | 6                | 0              | 2.921580                | -1.076135 | 0.110714  |
| 13               | 6                | 0              | 1.803886                | -1.867059 | 0.074329  |
| 14               | 6                | 0              | 0.499827                | -1.319623 | -0.051619 |
| 15               | 6                | 0              | 0.277069                | 0.044792  | -0.129827 |
| 16               | 1                | 0              | -1.281193               | 1.573577  | -0.260917 |
| 17               | 1                | 0              | 4.865046                | 0.796161  | 0.107514  |
| 18               | 1                | 0              | 0.980551                | -3.556684 | 0.113122  |
| 19               | 1                | 0              | 5.425453                | -2.893206 | 1.685629  |
| 20               | 8                | 0              | 0.133189                | 2.938529  | -0.326568 |
| 21               | 1                | 0              | 5.001114                | 4.106105  | -0.940346 |
| 22               | 1                | 0              | 5.893457                | 2.896119  | -0.009583 |
| 23               | 1                | 0              | 4.947693                | 4.136606  | 0.822103  |
| 24               | 8                | 0              | -0.476697               | -2.243462 | -0.062530 |
| 25               | 1                | 0              | 4.207142                | -1.841723 | 2.424000  |
| 26               | 1                | 0              | 3.713947                | -3.341064 | 1.621074  |
| 27               | 8                | 0              | 1.885471                | -3.219670 | 0.156143  |
| 28               | 1                | 0              | 5.047666                | -0.968518 | 0.275738  |
| 29               | 1                | 0              | 5.616180                | -3.041353 | -0.852182 |
| 30               | 1                | 0              | 4.560792                | -2.060129 | -1.881185 |
| 31               | 1                | 0              | 3.905696                | -3.465590 | -1.024637 |
| 32               | 1                | 0              | -1.343796               | -1.732186 | -0.111418 |
| 33               | 1                | 0              | 0.268907                | 3.883166  | -0.437219 |
| 34               | 7                | 0              | -2.079369               | -0.330063 | -0.247770 |
| 35               | 7                | 0              | -3.417253               | 0.018820  | -0.323514 |
| 36               | 6                | 0              | -4.160783               | -1.263623 | -0.183575 |
| 37               | 6                | 0              | -3.823115               | 1.156990  | 0.545004  |
| 38               | 6                | 0              | -5.664925               | -1.062913 | -0.070594 |
| 39               | 1                | 0              | -3.816254               | -1.760025 | 0.738583  |
| 40               | 6                | 0              | -5.346008               | 1.233631  | 0.705762  |
| 41               | 1                | 0              | -3.371170               | 0.995515  | 1.537278  |
| 42               | 6                | 0              | -6.001149               | -0.091513 | 1.046399  |
| 43               | 1                | 0              | -6.120463               | -2.042807 | 0.092950  |
| 44               | 1                | 0              | -6.051181               | -0.678747 | -1.022003 |
| 45               | 1                | 0              | -5.545442               | 1.988829  | 1.470504  |
| 46               | 1                | 0              | -5.771122               | 1.610037  | -0.232472 |
| 47               | 1                | 0              | -7.081493               | 0.032662  | 1.151775  |
| 48               | 1                | 0              | -5.620218               | -0.472026 | 2.001098  |
| 49               | 6                | 0              | -3.370634               | 2.520674  | -0.017896 |
| 50               | 1                | 0              | -2.419463               | 2.866919  | 0.383364  |
| 51               | 1                | 0              | -3.296684               | 2.462319  | -1.106023 |
| 52               | 1                | 0              | -4.115203               | 3.280789  | 0.228055  |
| 53               | 6                | 0              | -3.854055               | -2.155211 | -1.384574 |
| 54               | 1                | 0              | -4.170217               | -1.648501 | -2.299475 |
| 55               | 1                | 0              | -2.794489               | -2.388443 | -1.475510 |
| 56               | 1                | 0              | -4.404398               | -3.094656 | -1.296148 |
| 57               | 1                | 0              | 2.365420                | 4.209477  | -0.258266 |

-----  
**Structure 21f (CHCl<sub>3</sub>)**

Energy (Hartrees): = -1191.405452  
Imaginary frequency -161.58

Standard orientation:

| Center Number | Atomic Number | Atomic Type | Coordinates (Angstroms) |           |           |
|---------------|---------------|-------------|-------------------------|-----------|-----------|
|               |               |             | X                       | Y         | Z         |
| 1             | 6             | 0           | 4.401622                | -2.481612 | 1.607330  |
| 2             | 6             | 0           | 4.980304                | 3.463921  | 0.008550  |
| 3             | 6             | 0           | -1.112553               | 0.533408  | -0.231333 |
| 4             | 6             | 0           | 2.497781                | 3.125897  | -0.226418 |
| 5             | 6             | 0           | 3.774959                | 2.565375  | -0.048371 |
| 6             | 6             | 0           | 3.877840                | 1.203031  | 0.059972  |
| 7             | 6             | 0           | 2.744515                | 0.343640  | 0.009801  |
| 8             | 6             | 0           | 1.437757                | 0.913861  | -0.144264 |
| 9             | 6             | 0           | 1.375070                | 2.337454  | -0.275897 |
| 10            | 6             | 0           | 4.271277                | -1.754918 | 0.261727  |
| 11            | 6             | 0           | 4.589187                | -2.684017 | -0.918509 |
| 12            | 6             | 0           | 2.912624                | -1.085045 | 0.111575  |
| 13            | 6             | 0           | 1.789082                | -1.869235 | 0.071369  |
| 14            | 6             | 0           | 0.489135                | -1.314821 | -0.071663 |
| 15            | 6             | 0           | 0.277341                | 0.051321  | -0.165516 |
| 16            | 1             | 0           | -1.277717               | 1.592285  | -0.255547 |
| 17            | 1             | 0           | 4.864995                | 0.786409  | 0.191567  |
| 18            | 1             | 0           | 0.962252                | -3.566930 | 0.124549  |
| 19            | 1             | 0           | 5.411007                | -2.888586 | 1.714117  |
| 20            | 8             | 0           | 0.157909                | 2.927615  | -0.466956 |
| 21            | 1             | 0           | 5.097419                | 4.017827  | -0.927134 |
| 22            | 1             | 0           | 5.892200                | 2.890850  | 0.180727  |
| 23            | 1             | 0           | 4.881766                | 4.199369  | 0.811660  |
| 24            | 8             | 0           | -0.495909               | -2.228705 | -0.080428 |
| 25            | 1             | 0           | 4.224533                | -1.793738 | 2.438006  |
| 26            | 1             | 0           | 3.690863                | -3.304917 | 1.684890  |
| 27            | 8             | 0           | 1.865363                | -3.221306 | 0.168792  |
| 28            | 1             | 0           | 5.040374                | -0.987265 | 0.253385  |
| 29            | 1             | 0           | 5.605866                | -3.074105 | -0.817449 |
| 30            | 1             | 0           | 4.528551                | -2.142533 | -1.866002 |
| 31            | 1             | 0           | 3.901510                | -3.528614 | -0.960305 |
| 32            | 1             | 0           | -1.360869               | -1.706047 | -0.143535 |
| 33            | 1             | 0           | 0.284244                | 3.876418  | -0.585350 |
| 34            | 7             | 0           | -2.080018               | -0.309810 | -0.272854 |
| 35            | 7             | 0           | -3.417532               | 0.040458  | -0.319560 |
| 36            | 6             | 0           | -4.160254               | -1.250110 | -0.220743 |
| 37            | 6             | 0           | -3.813350               | 1.145234  | 0.602702  |
| 38            | 6             | 0           | -5.662216               | -1.054933 | -0.078473 |
| 39            | 1             | 0           | -3.801776               | -1.781827 | 0.675311  |
| 40            | 6             | 0           | -5.333927               | 1.209208  | 0.788080  |
| 41            | 1             | 0           | -3.344883               | 0.942513  | 1.578600  |
| 42            | 6             | 0           | -5.981875               | -0.130570 | 1.082253  |
| 43            | 1             | 0           | -6.113298               | -2.041874 | 0.052306  |
| 44            | 1             | 0           | -6.063596               | -0.631884 | -1.007104 |
| 45            | 1             | 0           | -5.521707               | 1.930576  | 1.587394  |
| 46            | 1             | 0           | -5.774045               | 1.623854  | -0.126955 |
| 47            | 1             | 0           | -7.061101               | -0.011284 | 1.205441  |
| 48            | 1             | 0           | -5.588226               | -0.549600 | 2.015401  |
| 49            | 6             | 0           | -3.374633               | 2.531509  | 0.091941  |
| 50            | 1             | 0           | -2.400220               | 2.851773  | 0.458414  |
| 51            | 1             | 0           | -3.364668               | 2.541707  | -1.000808 |
| 52            | 1             | 0           | -4.094669               | 3.281722  | 0.426955  |
| 53            | 6             | 0           | -3.867268               | -2.091002 | -1.460073 |
| 54            | 1             | 0           | -4.194189               | -1.553236 | -2.354106 |
| 55            | 1             | 0           | -2.808203               | -2.321903 | -1.573134 |
| 56            | 1             | 0           | -4.415180               | -3.034674 | -1.402536 |
| 57            | 1             | 0           | 2.388213                | 4.202774  | -0.327346 |

-----  
**Structure 21f (DMSO)**

Energy (Hartrees): = -1191.3992282  
Imaginary frequency -152.94

Standard orientation:

| Center Number | Atomic Number | Atomic Type | Coordinates (Angstroms) |           |           |
|---------------|---------------|-------------|-------------------------|-----------|-----------|
|               |               |             | X                       | Y         | Z         |
| 1             | 6             | 0           | 4.357867                | -2.510655 | 1.645034  |
| 2             | 6             | 0           | 5.002519                | 3.442761  | -0.047152 |
| 3             | 6             | 0           | -1.108992               | 0.554842  | -0.186538 |
| 4             | 6             | 0           | 2.517845                | 3.118488  | -0.269210 |
| 5             | 6             | 0           | 3.791657                | 2.551605  | -0.083387 |
| 6             | 6             | 0           | 3.887803                | 1.189858  | 0.047943  |



|    |   |   |           |           |           |
|----|---|---|-----------|-----------|-----------|
| 7  | 6 | 0 | 2.748149  | 0.337187  | 0.015197  |
| 8  | 6 | 0 | 1.445016  | 0.914626  | -0.142264 |
| 9  | 6 | 0 | 1.390586  | 2.335481  | -0.304983 |
| 10 | 6 | 0 | 4.258406  | -1.766657 | 0.306783  |
| 11 | 6 | 0 | 4.599411  | -2.680455 | -0.877890 |
| 12 | 6 | 0 | 2.905611  | -1.092020 | 0.132196  |
| 13 | 6 | 0 | 1.778052  | -1.870143 | 0.073962  |
| 14 | 6 | 0 | 0.481838  | -1.307724 | -0.077287 |
| 15 | 6 | 0 | 0.278590  | 0.060503  | -0.157368 |
| 16 | 1 | 0 | -1.267849 | 1.614201  | -0.135259 |
| 17 | 1 | 0 | 4.874574  | 0.770616  | 0.176637  |
| 18 | 1 | 0 | 0.936432  | -3.556967 | 0.111924  |
| 19 | 1 | 0 | 5.367217  | -2.912262 | 1.770183  |
| 20 | 8 | 0 | 0.178687  | 2.924119  | -0.518738 |
| 21 | 1 | 0 | 4.920187  | 4.179341  | 0.756769  |
| 22 | 1 | 0 | 5.104054  | 3.997464  | -0.984063 |
| 23 | 1 | 0 | 5.913831  | 2.864160  | 0.109218  |
| 24 | 8 | 0 | -0.508348 | -2.215007 | -0.098141 |
| 25 | 1 | 0 | 4.158523  | -1.834442 | 2.480521  |
| 26 | 1 | 0 | 3.651275  | -3.339459 | 1.696602  |
| 27 | 8 | 0 | 1.842895  | -3.222725 | 0.167480  |
| 28 | 1 | 0 | 5.029016  | -1.001160 | 0.329950  |
| 29 | 1 | 0 | 5.606865  | -3.087001 | -0.753158 |
| 30 | 1 | 0 | 4.576238  | -2.121835 | -1.817331 |
| 31 | 1 | 0 | 3.900666  | -3.513965 | -0.954703 |
| 32 | 1 | 0 | -1.368450 | -1.684896 | -0.172429 |
| 33 | 1 | 0 | 0.310049  | 3.873328  | -0.637324 |
| 34 | 7 | 0 | -2.079281 | -0.280951 | -0.279627 |
| 35 | 7 | 0 | -3.417165 | 0.070006  | -0.305782 |
| 36 | 6 | 0 | -4.160336 | -1.225355 | -0.287763 |
| 37 | 6 | 0 | -3.825225 | 1.105051  | 0.691801  |
| 38 | 6 | 0 | -5.665365 | -1.033535 | -0.176323 |
| 39 | 1 | 0 | -3.824709 | -1.797778 | 0.591566  |
| 40 | 6 | 0 | -5.350088 | 1.177538  | 0.824887  |
| 41 | 1 | 0 | -3.398591 | 0.811507  | 1.663716  |
| 42 | 6 | 0 | -6.017785 | -0.170013 | 1.020551  |
| 43 | 1 | 0 | -6.120036 | -2.025046 | -0.107633 |
| 44 | 1 | 0 | -6.039126 | -0.562573 | -1.093510 |
| 45 | 1 | 0 | -5.560632 | 1.853317  | 1.657401  |
| 46 | 1 | 0 | -5.752767 | 1.647862  | -0.080481 |
| 47 | 1 | 0 | -7.099826 | -0.048003 | 1.112195  |
| 48 | 1 | 0 | -5.658917 | -0.642202 | 1.942245  |
| 49 | 6 | 0 | -3.346299 | 2.519538  | 0.313971  |
| 50 | 1 | 0 | -2.387782 | 2.791436  | 0.753652  |
| 51 | 1 | 0 | -3.282777 | 2.621248  | -0.772536 |
| 52 | 1 | 0 | -4.071961 | 3.251444  | 0.675714  |
| 53 | 6 | 0 | -3.841813 | -2.007553 | -1.558393 |
| 54 | 1 | 0 | -4.138433 | -1.422657 | -2.433722 |
| 55 | 1 | 0 | -2.783798 | -2.249872 | -1.655739 |
| 56 | 1 | 0 | -4.404985 | -2.943778 | -1.561293 |
| 57 | 1 | 0 | 2.416294  | 4.193265  | -0.398651 |

### Structure 22a (vacuum)

Energy (Hartrees): = -1191.3733217  
Imaginary frequency -115.52

Standard orientation:

| Center Number | Atomic Number | Atomic Type | Coordinates (Angstroms) |           |           |
|---------------|---------------|-------------|-------------------------|-----------|-----------|
|               |               |             | X                       | Y         | Z         |
| 1             | 6             | 0           | -1.784083               | -1.880032 | -0.045187 |
| 2             | 6             | 0           | -2.881431               | -1.104897 | 0.158186  |
| 3             | 6             | 0           | -2.734917               | 0.342095  | 0.062759  |
| 4             | 6             | 0           | -1.445259               | 0.929233  | -0.093011 |
| 5             | 6             | 0           | -0.273703               | 0.070739  | -0.191364 |
| 6             | 6             | 0           | -0.448734               | -1.336165 | -0.219516 |
| 7             | 6             | 0           | -4.221770               | -1.771800 | 0.424647  |
| 8             | 6             | 0           | -1.400009               | 2.342697  | -0.189936 |
| 9             | 6             | 0           | -2.534675               | 3.122655  | -0.141359 |
| 10            | 6             | 0           | -3.800974               | 2.544105  | -0.010099 |
| 11            | 6             | 0           | -3.877531               | 1.173446  | 0.089208  |
| 12            | 6             | 0           | -4.171972               | -2.739266 | 1.616576  |
| 13            | 6             | 0           | -4.746294               | -2.462497 | -0.840957 |
| 14            | 6             | 0           | -5.029515               | 3.414438  | 0.020493  |
| 15            | 6             | 0           | 1.062260                | 0.553563  | -0.217160 |
| 16            | 1             | 0           | 1.249163                | 1.605940  | -0.148924 |
| 17            | 1             | 0           | -4.860226               | 0.731905  | 0.166109  |
| 18            | 1             | 0           | -4.940863               | -1.003678 | 0.703188  |
| 19            | 1             | 0           | -5.181902               | -3.093933 | 1.838724  |
| 20            | 1             | 0           | -3.785357               | -2.235557 | 2.505385  |
| 21            | 1             | 0           | -3.540511               | -3.600573 | 1.405594  |
| 22            | 1             | 0           | -5.726479               | -2.909119 | -0.653450 |
| 23            | 1             | 0           | -4.844997               | -1.746028 | -1.659972 |
| 24            | 1             | 0           | -4.060701               | -3.252106 | -1.153177 |

|    |   |   |           |           |           |
|----|---|---|-----------|-----------|-----------|
| 25 | 8 | 0 | -1.828827 | -3.230883 | -0.068781 |
| 26 | 1 | 0 | -0.901617 | -3.498367 | -0.197466 |
| 27 | 8 | 0 | 0.490757  | -2.186471 | -0.345431 |
| 28 | 1 | 0 | -5.936902 | 2.810270  | 0.044969  |
| 29 | 1 | 0 | -5.074658 | 4.059893  | -0.860358 |
| 30 | 1 | 0 | -5.029274 | 4.060023  | 0.902895  |
| 31 | 8 | 0 | -0.179487 | 2.956927  | -0.351099 |
| 32 | 1 | 0 | -0.330912 | 3.894583  | -0.494502 |
| 33 | 7 | 0 | 2.080053  | -0.261211 | -0.317733 |
| 34 | 6 | 0 | 3.811851  | 1.194346  | 0.488680  |
| 35 | 6 | 0 | 4.133113  | -1.260641 | -0.078343 |
| 36 | 6 | 0 | 5.328117  | 1.274720  | 0.685907  |
| 37 | 1 | 0 | 3.331733  | 1.057414  | 1.471313  |
| 38 | 6 | 0 | 5.635792  | -1.080933 | 0.082738  |
| 39 | 1 | 0 | 3.731205  | -1.660610 | 0.867476  |
| 40 | 6 | 0 | 5.955311  | -0.032409 | 1.134146  |
| 41 | 1 | 0 | 5.512939  | 2.076949  | 1.404699  |
| 42 | 1 | 0 | 5.780798  | 1.583765  | -0.263476 |
| 43 | 1 | 0 | 6.059321  | -2.053869 | 0.342864  |
| 44 | 1 | 0 | 6.065670  | -0.783993 | -0.880859 |
| 45 | 1 | 0 | 7.034381  | 0.083839  | 1.257570  |
| 46 | 1 | 0 | 5.546318  | -0.338458 | 2.103770  |
| 47 | 7 | 0 | 3.452677  | 0.034452  | -0.367338 |
| 48 | 1 | 0 | 1.779332  | -1.263402 | -0.374343 |
| 49 | 6 | 0 | 3.361310  | 2.528538  | -0.147691 |
| 50 | 1 | 0 | 3.185282  | 2.388298  | -1.216094 |
| 51 | 1 | 0 | 2.462142  | 2.945580  | 0.304990  |
| 52 | 1 | 0 | 4.149601  | 3.274991  | -0.035676 |
| 53 | 6 | 0 | 3.856175  | -2.248698 | -1.212500 |
| 54 | 1 | 0 | 2.808372  | -2.535748 | -1.304784 |
| 55 | 1 | 0 | 4.180699  | -1.807778 | -2.157652 |
| 56 | 1 | 0 | 4.427975  | -3.162093 | -1.037252 |
| 57 | 1 | 0 | -2.437554 | 4.203174  | -0.220887 |

### Structure 22a (CHCl<sub>3</sub>)

Energy (Hartrees): = -1191.402163  
Imaginary frequency -110.90

Standard orientation:

| Center<br>Number | Atomic<br>Number | Atomic<br>Type | Coordinates (Angstroms) |           |           |
|------------------|------------------|----------------|-------------------------|-----------|-----------|
|                  |                  |                | X                       | Y         | Z         |
| 1                | 6                | 0              | -1.792426               | -1.881703 | -0.041002 |
| 2                | 6                | 0              | -2.887813               | -1.103192 | 0.165386  |
| 3                | 6                | 0              | -2.735759               | 0.343698  | 0.065516  |
| 4                | 6                | 0              | -1.444889               | 0.922012  | -0.121580 |
| 5                | 6                | 0              | -0.275460               | 0.058677  | -0.217575 |
| 6                | 6                | 0              | -0.454837               | -1.346108 | -0.228810 |
| 7                | 6                | 0              | -4.232029               | -1.765165 | 0.430806  |
| 8                | 6                | 0              | -1.394287               | 2.335994  | -0.251632 |
| 9                | 6                | 0              | -2.523708               | 3.123100  | -0.178544 |
| 10               | 6                | 0              | -3.789015               | 2.553566  | 0.006887  |
| 11               | 6                | 0              | -3.873648               | 1.183260  | 0.120098  |
| 12               | 6                | 0              | -4.194489               | -2.728750 | 1.625737  |
| 13               | 6                | 0              | -4.756531               | -2.457271 | -0.833733 |
| 14               | 6                | 0              | -5.008277               | 3.433512  | 0.079911  |
| 15               | 6                | 0              | 1.065663                | 0.543396  | -0.234756 |
| 16               | 1                | 0              | 1.252738                | 1.596066  | -0.161761 |
| 17               | 1                | 0              | -4.857298               | 0.751790  | 0.236585  |
| 18               | 1                | 0              | -4.950346               | -0.994168 | 0.700647  |
| 19               | 1                | 0              | -5.208503               | -3.072936 | 1.847666  |
| 20               | 1                | 0              | -3.807166               | -2.228554 | 2.517111  |
| 21               | 1                | 0              | -3.572398               | -3.599844 | 1.423184  |
| 22               | 1                | 0              | -5.739645               | -2.898745 | -0.647092 |
| 23               | 1                | 0              | -4.854351               | -1.743683 | -1.656139 |
| 24               | 1                | 0              | -4.077653               | -3.252833 | -1.147664 |
| 25               | 8                | 0              | -1.843346               | -3.233958 | -0.056544 |
| 26               | 1                | 0              | -0.917375               | -3.509626 | -0.187311 |
| 27               | 8                | 0              | 0.479652                | -2.203718 | -0.350815 |
| 28               | 1                | 0              | -5.921671               | 2.837797  | 0.113610  |
| 29               | 1                | 0              | -5.066196               | 4.097932  | -0.786241 |
| 30               | 1                | 0              | -4.982380               | 4.063609  | 0.973688  |
| 31               | 8                | 0              | -0.180068               | 2.929542  | -0.471309 |
| 32               | 1                | 0              | -0.312757               | 3.873670  | -0.615937 |
| 33               | 7                | 0              | 2.086883                | -0.263523 | -0.326455 |
| 34               | 6                | 0              | 3.803528                | 1.187650  | 0.528119  |
| 35               | 6                | 0              | 4.145938                | -1.259481 | -0.102220 |
| 36               | 6                | 0              | 5.316609                | 1.263731  | 0.747027  |
| 37               | 1                | 0              | 3.309639                | 1.024699  | 1.498486  |
| 38               | 6                | 0              | 5.644145                | -1.074519 | 0.088069  |
| 39               | 1                | 0              | 3.732189                | -1.689624 | 0.823869  |
| 40               | 6                | 0              | 5.939726                | -0.052717 | 1.171795  |
| 41               | 1                | 0              | 5.486848                | 2.047522  | 1.489223  |
| 42               | 1                | 0              | 5.782384                | 1.598184  | -0.187450 |

|    |   |   |           |           |           |
|----|---|---|-----------|-----------|-----------|
| 43 | 1 | 0 | 6.067137  | -2.052597 | 0.329296  |
| 44 | 1 | 0 | 6.089307  | -0.748345 | -0.859080 |
| 45 | 1 | 0 | 7.016576  | 0.064476  | 1.313798  |
| 46 | 1 | 0 | 5.516198  | -0.385425 | 2.126442  |
| 47 | 7 | 0 | 3.456645  | 0.041962  | -0.359985 |
| 48 | 1 | 0 | 1.809262  | -1.265881 | -0.382048 |
| 49 | 6 | 0 | 3.359305  | 2.534162  | -0.082506 |
| 50 | 1 | 0 | 3.212183  | 2.430448  | -1.160241 |
| 51 | 1 | 0 | 2.447067  | 2.934945  | 0.359934  |
| 52 | 1 | 0 | 4.137780  | 3.283580  | 0.073030  |
| 53 | 6 | 0 | 3.893410  | -2.210004 | -1.271946 |
| 54 | 1 | 0 | 2.845400  | -2.482282 | -1.407353 |
| 55 | 1 | 0 | 4.250744  | -1.751405 | -2.197240 |
| 56 | 1 | 0 | 4.447226  | -3.136356 | -1.105177 |
| 57 | 1 | 0 | -2.420487 | 4.200486  | -0.281691 |

-----  
**Structure 22a (DMSO)**

Energy (Hartrees): = -1191.3967557  
Imaginary frequency -104.11

Standard orientation:

| Center<br>Number | Atomic<br>Number | Atomic<br>Type | Coordinates (Angstroms) |           |           |
|------------------|------------------|----------------|-------------------------|-----------|-----------|
|                  |                  |                | X                       | Y         | Z         |
| 1                | 6                | 0              | -1.791433               | -1.884119 | -0.042262 |
| 2                | 6                | 0              | -2.886388               | -1.107018 | 0.173054  |
| 3                | 6                | 0              | -2.736691               | 0.339701  | 0.064797  |
| 4                | 6                | 0              | -1.446329               | 0.919484  | -0.123458 |
| 5                | 6                | 0              | -0.275087               | 0.057752  | -0.220449 |
| 6                | 6                | 0              | -0.454101               | -1.346838 | -0.238768 |
| 7                | 6                | 0              | -4.228889               | -1.764516 | 0.455752  |
| 8                | 6                | 0              | -1.398750               | 2.333498  | -0.262317 |
| 9                | 6                | 0              | -2.530079               | 3.119043  | -0.194544 |
| 10               | 6                | 0              | -3.794676               | 2.546984  | -0.008228 |
| 11               | 6                | 0              | -3.877595               | 1.176573  | 0.112805  |
| 12               | 6                | 0              | -4.177570               | -2.736711 | 1.642320  |
| 13               | 6                | 0              | -4.778673               | -2.444242 | -0.803946 |
| 14               | 6                | 0              | -5.015574               | 3.424274  | 0.057413  |
| 15               | 6                | 0              | 1.066949                | 0.545604  | -0.227540 |
| 16               | 1                | 0              | 1.252796                | 1.597364  | -0.136014 |
| 17               | 1                | 0              | -4.861341               | 0.743942  | 0.227808  |
| 18               | 1                | 0              | -4.938190               | -0.991713 | 0.743371  |
| 19               | 1                | 0              | -5.189994               | -3.077369 | 1.876002  |
| 20               | 1                | 0              | -3.776861               | -2.244221 | 2.532362  |
| 21               | 1                | 0              | -3.561905               | -3.609176 | 1.426061  |
| 22               | 1                | 0              | -5.761178               | -2.880676 | -0.603224 |
| 23               | 1                | 0              | -4.888039               | -1.724189 | -1.619501 |
| 24               | 1                | 0              | -4.110669               | -3.242223 | -1.135726 |
| 25               | 8                | 0              | -1.836127               | -3.236042 | -0.057634 |
| 26               | 1                | 0              | -0.907775               | -3.500410 | -0.195761 |
| 27               | 8                | 0              | 0.477136                | -2.205419 | -0.370824 |
| 28               | 1                | 0              | -5.927644               | 2.826184  | 0.087118  |
| 29               | 1                | 0              | -5.068036               | 4.088878  | -0.808830 |
| 30               | 1                | 0              | -4.994151               | 4.055948  | 0.950166  |
| 31               | 8                | 0              | -0.187612               | 2.925999  | -0.487103 |
| 32               | 1                | 0              | -0.320265               | 3.874799  | -0.605866 |
| 33               | 7                | 0              | 2.089903                | -0.256569 | -0.329562 |
| 34               | 6                | 0              | 3.804322                | 1.178301  | 0.560948  |
| 35               | 6                | 0              | 4.153159                | -1.252269 | -0.129354 |
| 36               | 6                | 0              | 5.317469                | 1.253145  | 0.776154  |
| 37               | 1                | 0              | 3.314035                | 0.986991  | 1.527224  |
| 38               | 6                | 0              | 5.650900                | -1.066847 | 0.061054  |
| 39               | 1                | 0              | 3.743380                | -1.703076 | 0.788210  |
| 40               | 6                | 0              | 5.945529                | -0.070722 | 1.168126  |
| 41               | 1                | 0              | 5.486583                | 2.020534  | 1.535403  |
| 42               | 1                | 0              | 5.779216                | 1.610718  | -0.151917 |
| 43               | 1                | 0              | 6.075788                | -2.050104 | 0.276395  |
| 44               | 1                | 0              | 6.092754                | -0.716049 | -0.878958 |
| 45               | 1                | 0              | 7.022442                | 0.046984  | 1.309257  |
| 46               | 1                | 0              | 5.525109                | -0.427700 | 2.115217  |
| 47               | 7                | 0              | 3.458623                | 0.053348  | -0.356414 |
| 48               | 1                | 0              | 1.821018                | -1.258477 | -0.394773 |
| 49               | 6                | 0              | 3.352608                | 2.537827  | -0.012860 |
| 50               | 1                | 0              | 3.183272                | 2.461001  | -1.089735 |
| 51               | 1                | 0              | 2.451279                | 2.929056  | 0.459374  |
| 52               | 1                | 0              | 4.135323                | 3.282223  | 0.144428  |
| 53               | 6                | 0              | 3.902903                | -2.175770 | -1.320427 |
| 54               | 1                | 0              | 2.853802                | -2.435852 | -1.472373 |
| 55               | 1                | 0              | 4.272948                | -1.702151 | -2.233274 |
| 56               | 1                | 0              | 4.447766                | -3.109734 | -1.167682 |
| 57               | 1                | 0              | -2.430351               | 4.195929  | -0.308054 |

-----  
**Structure 22b (vacuum)**

Energy (Hartrees): = -1191.3928566  
 No imaginary frequencies

Standard orientation:

| Center<br>Number | Atomic<br>Number | Atomic<br>Type | Coordinates (Angstroms) |           |           |
|------------------|------------------|----------------|-------------------------|-----------|-----------|
|                  |                  |                | X                       | Y         | Z         |
| 1                | 6                | 0              | 1.883273                | -1.840099 | -0.318848 |
| 2                | 6                | 0              | 2.937768                | -1.044977 | -0.015821 |
| 3                | 6                | 0              | 2.716669                | 0.398788  | 0.086924  |
| 4                | 6                | 0              | 1.399966                | 0.933748  | 0.041981  |
| 5                | 6                | 0              | 0.259342                | 0.033758  | -0.128757 |
| 6                | 6                | 0              | 0.506305                | -1.354100 | -0.390383 |
| 7                | 6                | 0              | 4.315563                | -1.667119 | 0.146350  |
| 8                | 6                | 0              | 1.280495                | 2.341030  | 0.095846  |
| 9                | 6                | 0              | 2.379548                | 3.169164  | 0.211371  |
| 10               | 6                | 0              | 3.671631                | 2.643826  | 0.253843  |
| 11               | 6                | 0              | 3.817381                | 1.273721  | 0.188770  |
| 12               | 6                | 0              | 4.852452                | -2.159809 | -1.204247 |
| 13               | 6                | 0              | 4.333907                | -2.782481 | 1.201949  |
| 14               | 6                | 0              | 4.859600                | 3.563604  | 0.357179  |
| 15               | 6                | 0              | -1.075180               | 0.421082  | 0.022200  |
| 16               | 1                | 0              | -1.345162               | 1.417656  | 0.337035  |
| 17               | 1                | 0              | 4.822124                | 0.877810  | 0.188725  |
| 18               | 1                | 0              | 4.999209                | -0.905262 | 0.516270  |
| 19               | 1                | 0              | 5.856919                | -2.574464 | -1.085555 |
| 20               | 1                | 0              | 4.900087                | -1.340075 | -1.925022 |
| 21               | 1                | 0              | 4.201943                | -2.937583 | -1.607241 |
| 22               | 1                | 0              | 5.363438                | -3.113088 | 1.362690  |
| 23               | 1                | 0              | 3.941607                | -2.417700 | 2.153938  |
| 24               | 1                | 0              | 3.740523                | -3.639571 | 0.888684  |
| 25               | 8                | 0              | 1.994729                | -3.168833 | -0.535866 |
| 26               | 1                | 0              | 1.078787                | -3.463849 | -0.686214 |
| 27               | 8                | 0              | -0.375519               | -2.217144 | -0.619857 |
| 28               | 1                | 0              | 5.792770                | 2.999845  | 0.355907  |
| 29               | 1                | 0              | 4.820723                | 4.151150  | 1.278073  |
| 30               | 1                | 0              | 4.885683                | 4.264788  | -0.480773 |
| 31               | 8                | 0              | 0.029127                | 2.896107  | 0.016053  |
| 32               | 1                | 0              | 0.121103                | 3.851980  | -0.004501 |
| 33               | 7                | 0              | -2.113152               | -0.373487 | -0.177145 |
| 34               | 6                | 0              | -4.177042               | 0.095617  | -1.200196 |
| 35               | 6                | 0              | -4.033854               | -0.755975 | 1.115917  |
| 36               | 6                | 0              | -5.582966               | 0.624491  | -0.926201 |
| 37               | 1                | 0              | -4.257567               | -0.939946 | -1.577205 |
| 38               | 6                | 0              | -5.438225               | -0.232558 | 1.406909  |
| 39               | 1                | 0              | -4.116423               | -1.791365 | 0.737741  |
| 40               | 6                | 0              | -6.293877               | -0.192634 | 0.146305  |
| 41               | 1                | 0              | -6.146974               | 0.615549  | -1.862423 |
| 42               | 1                | 0              | -5.497218               | 1.668208  | -0.603130 |
| 43               | 1                | 0              | -5.895108               | -0.867938 | 2.169984  |
| 44               | 1                | 0              | -5.345930               | 0.775029  | 1.827716  |
| 45               | 1                | 0              | -7.278655               | 0.228552  | 0.361271  |
| 46               | 1                | 0              | -6.452951               | -1.213774 | -0.218987 |
| 47               | 7                | 0              | -3.412756               | 0.088798  | 0.068930  |
| 48               | 1                | 0              | -1.932212               | -1.341785 | -0.466803 |
| 49               | 6                | 0              | -3.467591               | 0.956330  | -2.237411 |
| 50               | 1                | 0              | -3.299483               | 1.958151  | -1.832914 |
| 51               | 1                | 0              | -2.505377               | 0.537815  | -2.531849 |
| 52               | 1                | 0              | -4.089525               | 1.040869  | -3.130652 |
| 53               | 6                | 0              | -3.176479               | -0.749320 | 2.374902  |
| 54               | 1                | 0              | -2.211749               | -1.231670 | 2.216505  |
| 55               | 1                | 0              | -3.001724               | 0.280712  | 2.696970  |
| 56               | 1                | 0              | -3.695320               | -1.280305 | 3.175197  |
| 57               | 1                | 0              | 2.228994                | 4.245517  | 0.249937  |

### Structure 22b (CHCl<sub>3</sub>)

Energy (Hartrees): = -1191.4216749  
 No imaginary frequencies

Standard orientation:

| Center<br>Number | Atomic<br>Number | Atomic<br>Type | Coordinates (Angstroms) |           |           |
|------------------|------------------|----------------|-------------------------|-----------|-----------|
|                  |                  |                | X                       | Y         | Z         |
| 1                | 6                | 0              | 1.898838                | -1.835027 | -0.339662 |
| 2                | 6                | 0              | 2.949540                | -1.036239 | -0.027658 |
| 3                | 6                | 0              | 2.718048                | 0.405107  | 0.090291  |
| 4                | 6                | 0              | 1.395669                | 0.928271  | 0.039962  |
| 5                | 6                | 0              | 0.263330                | 0.019416  | -0.137087 |
| 6                | 6                | 0              | 0.518229                | -1.359917 | -0.413519 |
| 7                | 6                | 0              | 4.331331                | -1.652181 | 0.133936  |
| 8                | 6                | 0              | 1.261323                | 2.337545  | 0.087572  |
| 9                | 6                | 0              | 2.351880                | 3.174950  | 0.221648  |
| 10               | 6                | 0              | 3.648922                | 2.659320  | 0.285151  |

|    |   |   |           |           |           |
|----|---|---|-----------|-----------|-----------|
| 11 | 6 | 0 | 3.810917  | 1.290236  | 0.213450  |
| 12 | 6 | 0 | 4.869835  | -2.154862 | -1.211693 |
| 13 | 6 | 0 | 4.356672  | -2.758017 | 1.198678  |
| 14 | 6 | 0 | 4.824417  | 3.590231  | 0.422287  |
| 15 | 6 | 0 | -1.076177 | 0.399517  | 0.040937  |
| 16 | 1 | 0 | -1.338602 | 1.386149  | 0.392560  |
| 17 | 1 | 0 | 4.820746  | 0.906611  | 0.227656  |
| 18 | 1 | 0 | 5.015145  | -0.885634 | 0.491813  |
| 19 | 1 | 0 | 5.878917  | -2.558444 | -1.090165 |
| 20 | 1 | 0 | 4.912481  | -1.343273 | -1.942661 |
| 21 | 1 | 0 | 4.230106  | -2.944042 | -1.611014 |
| 22 | 1 | 0 | 5.387175  | -3.088000 | 1.357203  |
| 23 | 1 | 0 | 3.971563  | -2.387507 | 2.152225  |
| 24 | 1 | 0 | 3.762543  | -3.620801 | 0.899405  |
| 25 | 8 | 0 | 2.021951  | -3.163206 | -0.564168 |
| 26 | 1 | 0 | 1.108846  | -3.469000 | -0.717523 |
| 27 | 8 | 0 | -0.357669 | -2.228975 | -0.655320 |
| 28 | 1 | 0 | 5.766704  | 3.041883  | 0.386455  |
| 29 | 1 | 0 | 4.783023  | 4.132230  | 1.371209  |
| 30 | 1 | 0 | 4.831211  | 4.334066  | -0.378849 |
| 31 | 8 | 0 | 0.009618  | 2.874869  | -0.020576 |
| 32 | 1 | 0 | 0.081206  | 3.836304  | -0.037996 |
| 33 | 7 | 0 | -2.114183 | -0.383153 | -0.165901 |
| 34 | 6 | 0 | -4.165458 | 0.141345  | -1.189445 |
| 35 | 6 | 0 | -4.050098 | -0.807014 | 1.093084  |
| 36 | 6 | 0 | -5.568353 | 0.672649  | -0.905624 |
| 37 | 1 | 0 | -4.249678 | -0.879286 | -1.600464 |
| 38 | 6 | 0 | -5.452480 | -0.283489 | 1.392569  |
| 39 | 1 | 0 | -4.135469 | -1.821200 | 0.665223  |
| 40 | 6 | 0 | -6.295508 | -0.180532 | 0.127184  |
| 41 | 1 | 0 | -6.122943 | 0.703805  | -1.846947 |
| 42 | 1 | 0 | -5.477471 | 1.702723  | -0.541741 |
| 43 | 1 | 0 | -5.920707 | -0.949761 | 2.121682  |
| 44 | 1 | 0 | -5.357264 | 0.703844  | 1.859147  |
| 45 | 1 | 0 | -7.276928 | 0.243602  | 0.352617  |
| 46 | 1 | 0 | -6.462016 | -1.183677 | -0.282272 |
| 47 | 7 | 0 | -3.412580 | 0.081837  | 0.089230  |
| 48 | 1 | 0 | -1.954172 | -1.340763 | -0.494590 |
| 49 | 6 | 0 | -3.440903 | 1.031950  | -2.189255 |
| 50 | 1 | 0 | -3.261982 | 2.019082  | -1.752773 |
| 51 | 1 | 0 | -2.483389 | 0.613768  | -2.502451 |
| 52 | 1 | 0 | -4.059852 | 1.156235  | -3.080549 |
| 53 | 6 | 0 | -3.205912 | -0.863519 | 2.358790  |
| 54 | 1 | 0 | -2.245548 | -1.354040 | 2.193221  |
| 55 | 1 | 0 | -3.020931 | 0.147842  | 2.732330  |
| 56 | 1 | 0 | -3.740254 | -1.422797 | 3.129745  |
| 57 | 1 | 0 | 2.189295  | 4.249351  | 0.255137  |

### Structure 22b (DMSO)

Energy (Hartrees): = -1191.4163264  
No imaginary frequencies

Standard orientation:

| Center<br>Number | Atomic<br>Number | Atomic<br>Type | Coordinates (Angstroms) |           |           |
|------------------|------------------|----------------|-------------------------|-----------|-----------|
|                  |                  |                | X                       | Y         | Z         |
| 1                | 6                | 0              | 1.905282                | -1.838451 | -0.328467 |
| 2                | 6                | 0              | 2.954975                | -1.035523 | -0.022316 |
| 3                | 6                | 0              | 2.717849                | 0.405302  | 0.095273  |
| 4                | 6                | 0              | 1.393044                | 0.924257  | 0.042358  |
| 5                | 6                | 0              | 0.262878                | 0.011139  | -0.129092 |
| 6                | 6                | 0              | 0.521079                | -1.369025 | -0.393909 |
| 7                | 6                | 0              | 4.341837                | -1.642965 | 0.126456  |
| 8                | 6                | 0              | 1.255500                | 2.334503  | 0.082554  |
| 9                | 6                | 0              | 2.343362                | 3.175818  | 0.216807  |
| 10               | 6                | 0              | 3.641730                | 2.663274  | 0.287676  |
| 11               | 6                | 0              | 3.808516                | 1.293927  | 0.220155  |
| 12               | 6                | 0              | 4.873431                | -2.130632 | -1.226822 |
| 13               | 6                | 0              | 4.383641                | -2.755971 | 1.182407  |
| 14               | 6                | 0              | 4.814597                | 3.596957  | 0.424155  |
| 15               | 6                | 0              | -1.079337               | 0.390916  | 0.045245  |
| 16               | 1                | 0              | -1.342033               | 1.381301  | 0.385337  |
| 17               | 1                | 0              | 4.819985                | 0.914513  | 0.240205  |
| 18               | 1                | 0              | 5.024076                | -0.874943 | 0.483395  |
| 19               | 1                | 0              | 5.887429                | -2.524781 | -1.116501 |
| 20               | 1                | 0              | 4.903679                | -1.312236 | -1.951140 |
| 21               | 1                | 0              | 4.238413                | -2.922843 | -1.628413 |
| 22               | 1                | 0              | 5.417570                | -3.080801 | 1.328085  |
| 23               | 1                | 0              | 4.007275                | -2.394416 | 2.143133  |
| 24               | 1                | 0              | 3.791085                | -3.620339 | 0.884000  |
| 25               | 8                | 0              | 2.027745                | -3.165895 | -0.555242 |
| 26               | 1                | 0              | 1.111288                | -3.465414 | -0.702256 |
| 27               | 8                | 0              | -0.351111               | -2.244517 | -0.622333 |

|    |   |   |           |           |           |
|----|---|---|-----------|-----------|-----------|
| 28 | 1 | 0 | 5.757167  | 3.048436  | 0.400774  |
| 29 | 1 | 0 | 4.764173  | 4.149443  | 1.366531  |
| 30 | 1 | 0 | 4.824003  | 4.333341  | -0.383710 |
| 31 | 8 | 0 | 0.004758  | 2.868495  | -0.034308 |
| 32 | 1 | 0 | 0.075820  | 3.831242  | -0.039984 |
| 33 | 7 | 0 | -2.116828 | -0.391226 | -0.151977 |
| 34 | 6 | 0 | -4.158695 | 0.131426  | -1.194147 |
| 35 | 6 | 0 | -4.061685 | -0.799435 | 1.096392  |
| 36 | 6 | 0 | -5.561844 | 0.667939  | -0.924361 |
| 37 | 1 | 0 | -4.239929 | -0.893050 | -1.594186 |
| 38 | 6 | 0 | -5.465124 | -0.271885 | 1.381510  |
| 39 | 1 | 0 | -4.143651 | -1.814768 | 0.672591  |
| 40 | 6 | 0 | -6.298190 | -0.175868 | 0.109183  |
| 41 | 1 | 0 | -6.108616 | 0.692322  | -1.870409 |
| 42 | 1 | 0 | -5.472196 | 1.701061  | -0.568144 |
| 43 | 1 | 0 | -5.938535 | -0.934147 | 2.110827  |
| 44 | 1 | 0 | -5.373190 | 0.718095  | 1.843685  |
| 45 | 1 | 0 | -7.279957 | 0.252978  | 0.324237  |
| 46 | 1 | 0 | -6.463199 | -1.181385 | -0.294616 |
| 47 | 7 | 0 | -3.414709 | 0.083320  | 0.091695  |
| 48 | 1 | 0 | -1.966718 | -1.353332 | -0.470478 |
| 49 | 6 | 0 | -3.426269 | 1.012252  | -2.196083 |
| 50 | 1 | 0 | -3.256138 | 2.006369  | -1.771430 |
| 51 | 1 | 0 | -2.464232 | 0.592448  | -2.493830 |
| 52 | 1 | 0 | -4.036209 | 1.121505  | -3.095485 |
| 53 | 6 | 0 | -3.227597 | -0.847224 | 2.368628  |
| 54 | 1 | 0 | -2.267775 | -1.343034 | 2.214458  |
| 55 | 1 | 0 | -3.041560 | 0.166662  | 2.735378  |
| 56 | 1 | 0 | -3.770255 | -1.398241 | 3.139747  |
| 57 | 1 | 0 | 2.177993  | 4.250295  | 0.243614  |

-----

### Structure 22c (vacuum)

Energy (Hartrees): = -1191.3733218  
Imaginary frequency -115.43

Standard orientation:

| Center<br>Number | Atomic<br>Number | Atomic<br>Type | Coordinates (Angstroms) |           |           |
|------------------|------------------|----------------|-------------------------|-----------|-----------|
|                  |                  |                | X                       | Y         | Z         |
| 1                | 6                | 0              | 1.784041                | -1.880059 | -0.045199 |
| 2                | 6                | 0              | 2.881345                | -1.104943 | 0.158443  |
| 3                | 6                | 0              | 2.734878                | 0.342051  | 0.062920  |
| 4                | 6                | 0              | 1.445250                | 0.929219  | -0.092926 |
| 5                | 6                | 0              | 0.273685                | 0.070748  | -0.191357 |
| 6                | 6                | 0              | 0.448700                | -1.336158 | -0.219588 |
| 7                | 6                | 0              | 4.221699                | -1.771742 | 0.425051  |
| 8                | 6                | 0              | 1.400051                | 2.342667  | -0.190000 |
| 9                | 6                | 0              | 2.534746                | 3.122591  | -0.141441 |
| 10               | 6                | 0              | 3.801019                | 2.544007  | -0.010100 |
| 11               | 6                | 0              | 3.877525                | 1.173349  | 0.089326  |
| 12               | 6                | 0              | 4.746873                | -2.461431 | -0.840841 |
| 13               | 6                | 0              | 4.171763                | -2.740116 | 1.616236  |
| 14               | 6                | 0              | 5.029601                | 3.414286  | 0.020479  |
| 15               | 6                | 0              | -1.062262               | 0.553603  | -0.217026 |
| 16               | 1                | 0              | -1.249141               | 1.605967  | -0.148524 |
| 17               | 1                | 0              | 4.860201                | 0.731762  | 0.166275  |
| 18               | 1                | 0              | 4.940440                | -1.003594 | 0.704449  |
| 19               | 1                | 0              | 5.726948                | -2.908242 | -0.653206 |
| 20               | 1                | 0              | 4.845969                | -1.744362 | -1.659283 |
| 21               | 1                | 0              | 4.061387                | -3.250782 | -1.153966 |
| 22               | 1                | 0              | 5.181850                | -3.093927 | 1.839030  |
| 23               | 1                | 0              | 3.783830                | -2.237462 | 2.505069  |
| 24               | 1                | 0              | 3.541362                | -3.601900 | 1.404066  |
| 25               | 8                | 0              | 1.828785                | -3.230901 | -0.068966 |
| 26               | 1                | 0              | 0.901575                | -3.498369 | -0.197685 |
| 27               | 8                | 0              | -0.490793               | -2.186436 | -0.345595 |
| 28               | 1                | 0              | 5.936968                | 2.810080  | 0.044835  |
| 29               | 1                | 0              | 5.029455                | 4.059777  | 0.902949  |
| 30               | 1                | 0              | 5.074711                | 4.059827  | -0.860309 |
| 31               | 8                | 0              | 0.179550                | 2.956910  | -0.351278 |
| 32               | 1                | 0              | 0.331012                | 3.894527  | -0.494895 |
| 33               | 7                | 0              | -2.080083               | -0.261113 | -0.317813 |
| 34               | 6                | 0              | -4.133118               | -1.260602 | -0.078525 |
| 35               | 6                | 0              | -3.811920               | 1.194303  | 0.488880  |
| 36               | 6                | 0              | -5.635803               | -1.080947 | 0.082553  |
| 37               | 1                | 0              | -3.731214               | -1.660701 | 0.867242  |
| 38               | 6                | 0              | -5.328194               | 1.274611  | 0.686092  |
| 39               | 1                | 0              | -3.331828               | 1.057236  | 1.471510  |
| 40               | 6                | 0              | -5.955373               | -0.032601 | 1.134118  |
| 41               | 1                | 0              | -6.059337               | -2.053934 | 0.342483  |
| 42               | 1                | 0              | -6.065645               | -0.783832 | -0.881006 |
| 43               | 1                | 0              | -5.513049               | 2.076723  | 1.405004  |
| 44               | 1                | 0              | -5.780867               | 1.583791  | -0.263250 |
| 45               | 1                | 0              | -7.034451               | 0.083609  | 1.257513  |

|    |   |   |           |           |           |
|----|---|---|-----------|-----------|-----------|
| 46 | 1 | 0 | -5.546411 | -0.338776 | 2.103714  |
| 47 | 7 | 0 | -3.452708 | 0.034551  | -0.367321 |
| 48 | 1 | 0 | -1.779426 | -1.263293 | -0.374602 |
| 49 | 6 | 0 | -3.856152 | -2.248496 | -1.212820 |
| 50 | 1 | 0 | -4.180751 | -1.807486 | -2.157905 |
| 51 | 1 | 0 | -2.808333 | -2.535465 | -1.305184 |
| 52 | 1 | 0 | -4.427882 | -3.161952 | -1.037663 |
| 53 | 6 | 0 | -3.361423 | 2.528624  | -0.147233 |
| 54 | 1 | 0 | -2.462155 | 2.945514  | 0.305384  |
| 55 | 1 | 0 | -3.185610 | 2.388650  | -1.215708 |
| 56 | 1 | 0 | -4.149663 | 3.275078  | -0.034855 |
| 57 | 1 | 0 | 2.437668  | 4.203106  | -0.221072 |

### Structure 22c (CHCl<sub>3</sub>)

Energy (Hartrees): = -1191.402163  
Imaginary frequency -110.94

Standard orientation:

| Center Number | Atomic Number | Atomic Type | Coordinates (Angstroms) |           |           |
|---------------|---------------|-------------|-------------------------|-----------|-----------|
|               |               |             | X                       | Y         | Z         |
| 1             | 6             | 0           | 1.792426                | -1.881705 | -0.040967 |
| 2             | 6             | 0           | 2.887816                | -1.103192 | 0.165401  |
| 3             | 6             | 0           | 2.735761                | 0.343696  | 0.065517  |
| 4             | 6             | 0           | 1.444888                | 0.922012  | -0.121552 |
| 5             | 6             | 0           | 0.275457                | 0.058676  | -0.217532 |
| 6             | 6             | 0           | 0.454835                | -1.346110 | -0.228751 |
| 7             | 6             | 0           | 4.232038                | -1.765157 | 0.430804  |
| 8             | 6             | 0           | 1.394288                | 2.335999  | -0.251569 |
| 9             | 6             | 0           | 2.523715                | 3.123099  | -0.178507 |
| 10            | 6             | 0           | 3.789027                | 2.553557  | 0.006867  |
| 11            | 6             | 0           | 3.873657                | 1.183252  | 0.120065  |
| 12            | 6             | 0           | 4.756576                | -2.457146 | -0.833783 |
| 13            | 6             | 0           | 4.194509                | -2.728842 | 1.625655  |
| 14            | 6             | 0           | 5.008299                | 3.433496  | 0.079828  |
| 15            | 6             | 0           | -1.065667               | 0.543394  | -0.234756 |
| 16            | 1             | 0           | -1.252745               | 1.596067  | -0.161824 |
| 17            | 1             | 0           | 4.857307                | 0.751773  | 0.236526  |
| 18            | 1             | 0           | 4.950326                | -0.994162 | 0.700728  |
| 19            | 1             | 0           | 5.739667                | -2.898676 | -0.647147 |
| 20            | 1             | 0           | 4.854457                | -1.743475 | -1.656111 |
| 21            | 1             | 0           | 4.077682                | -3.252650 | -1.147828 |
| 22            | 1             | 0           | 5.208553                | -3.072873 | 1.847683  |
| 23            | 1             | 0           | 3.806993                | -2.228781 | 2.517021  |
| 24            | 1             | 0           | 3.572585                | -3.600024 | 1.422964  |
| 25            | 8             | 0           | 1.843350                | -3.233959 | -0.056514 |
| 26            | 1             | 0           | 0.917378                | -3.509630 | -0.187265 |
| 27            | 8             | 0           | -0.479655               | -2.203723 | -0.350731 |
| 28            | 1             | 0           | 5.921673                | 2.837764  | 0.113780  |
| 29            | 1             | 0           | 4.982309                | 4.063813  | 0.973446  |
| 30            | 1             | 0           | 5.066345                | 4.097702  | -0.786481 |
| 31            | 8             | 0           | 0.180062                | 2.929561  | -0.471176 |
| 32            | 1             | 0           | 0.312747                | 3.873697  | -0.615748 |
| 33            | 7             | 0           | -2.086887               | -0.263530 | -0.326420 |
| 34            | 6             | 0           | -4.145949               | -1.259481 | -0.102244 |
| 35            | 6             | 0           | -3.803552               | 1.187648  | 0.528107  |
| 36            | 6             | 0           | -5.644161               | -1.074520 | 0.088008  |
| 37            | 1             | 0           | -3.732224               | -1.689619 | 0.823858  |
| 38            | 6             | 0           | -5.316639               | 1.263728  | 0.746981  |
| 39            | 1             | 0           | -3.309683               | 1.024692  | 1.498483  |
| 40            | 6             | 0           | -5.939769               | -0.052720 | 1.171729  |
| 41            | 1             | 0           | -6.067157               | -2.052599 | 0.329223  |
| 42            | 1             | 0           | -6.089300               | -0.748346 | -0.859152 |
| 43            | 1             | 0           | -5.486893               | 2.047517  | 1.489176  |
| 44            | 1             | 0           | -5.782392               | 1.598186  | -0.187506 |
| 45            | 1             | 0           | -7.016623               | 0.064475  | 1.313700  |
| 46            | 1             | 0           | -5.516270               | -0.385433 | 2.126387  |
| 47            | 7             | 0           | -3.456648               | 0.041961  | -0.359995 |
| 48            | 1             | 0           | -1.809266               | -1.265892 | -0.381958 |
| 49            | 6             | 0           | -3.893389               | -2.210008 | -1.271959 |
| 50            | 1             | 0           | -4.250687               | -1.751409 | -2.197266 |
| 51            | 1             | 0           | -2.845376               | -2.482294 | -1.407329 |
| 52            | 1             | 0           | -4.447218               | -3.136355 | -1.105206 |
| 53            | 6             | 0           | -3.359319               | 2.534161  | -0.082506 |
| 54            | 1             | 0           | -2.447085               | 2.934942  | 0.359945  |
| 55            | 1             | 0           | -3.212183               | 2.430450  | -1.160240 |
| 56            | 1             | 0           | -4.137795               | 3.283580  | 0.073021  |
| 57            | 1             | 0           | 2.420491                | 4.200488  | -0.281622 |

### Structure 22c (DMSO)

Energy (Hartrees): = -1191.3967557  
Imaginary frequency -104.11

## Standard orientation:

| Center<br>Number | Atomic<br>Number | Atomic<br>Type | Coordinates (Angstroms) |           |           |
|------------------|------------------|----------------|-------------------------|-----------|-----------|
|                  |                  |                | X                       | Y         | Z         |
| 1                | 6                | 0              | 1.791437                | -1.884118 | -0.042263 |
| 2                | 6                | 0              | 2.886392                | -1.107015 | 0.173049  |
| 3                | 6                | 0              | 2.736692                | 0.339703  | 0.064797  |
| 4                | 6                | 0              | 1.446329                | 0.919485  | -0.123453 |
| 5                | 6                | 0              | 0.275088                | 0.057752  | -0.220441 |
| 6                | 6                | 0              | 0.454103                | -1.346839 | -0.238762 |
| 7                | 6                | 0              | 4.228895                | -1.764513 | 0.455737  |
| 8                | 6                | 0              | 1.398747                | 2.333499  | -0.262310 |
| 9                | 6                | 0              | 2.530074                | 3.119046  | -0.194536 |
| 10               | 6                | 0              | 3.794673                | 2.546988  | -0.008223 |
| 11               | 6                | 0              | 3.877595                | 1.176577  | 0.112806  |
| 12               | 6                | 0              | 4.778670                | -2.444244 | -0.803962 |
| 13               | 6                | 0              | 4.177584                | -2.736704 | 1.642311  |
| 14               | 6                | 0              | 5.015570                | 3.424280  | 0.057420  |
| 15               | 6                | 0              | -1.066949               | 0.545603  | -0.227529 |
| 16               | 1                | 0              | -1.252796               | 1.597362  | -0.135997 |
| 17               | 1                | 0              | 4.861342                | 0.743949  | 0.227807  |
| 18               | 1                | 0              | 4.938200                | -0.991710 | 0.743347  |
| 19               | 1                | 0              | 5.761178                | -2.880675 | -0.603246 |
| 20               | 1                | 0              | 4.888026                | -1.724196 | -1.619522 |
| 21               | 1                | 0              | 4.110666                | -3.242229 | -1.135732 |
| 22               | 1                | 0              | 5.190009                | -3.077366 | 1.875982  |
| 23               | 1                | 0              | 3.776887                | -2.244209 | 2.532354  |
| 24               | 1                | 0              | 3.561913                | -3.609167 | 1.426060  |
| 25               | 8                | 0              | 1.836132                | -3.236041 | -0.057635 |
| 26               | 1                | 0              | 0.907779                | -3.500409 | -0.195759 |
| 27               | 8                | 0              | -0.477134               | -2.205420 | -0.370815 |
| 28               | 1                | 0              | 5.927640                | 2.826193  | 0.087127  |
| 29               | 1                | 0              | 4.994143                | 4.055957  | 0.950170  |
| 30               | 1                | 0              | 5.068032                | 4.088883  | -0.808825 |
| 31               | 8                | 0              | 0.187608                | 2.925998  | -0.487093 |
| 32               | 1                | 0              | 0.320260                | 3.874798  | -0.605859 |
| 33               | 7                | 0              | -2.089902               | -0.256571 | -0.329554 |
| 34               | 6                | 0              | -4.153155               | -1.252276 | -0.129332 |
| 35               | 6                | 0              | -3.804329               | 1.178306  | 0.560933  |
| 36               | 6                | 0              | -5.650899               | -1.066856 | 0.061061  |
| 37               | 1                | 0              | -3.743379               | -1.703067 | 0.788241  |
| 38               | 6                | 0              | -5.317479               | 1.253151  | 0.776120  |
| 39               | 1                | 0              | -3.314053               | 0.987011  | 1.527217  |
| 40               | 6                | 0              | -5.945542               | -0.070708 | 1.168109  |
| 41               | 1                | 0              | -6.075784               | -2.050110 | 0.276419  |
| 42               | 1                | 0              | -6.092745               | -0.716080 | -0.878963 |
| 43               | 1                | 0              | -5.486604               | 2.020554  | 1.535352  |
| 44               | 1                | 0              | -5.779214               | 1.610706  | -0.151965 |
| 45               | 1                | 0              | -7.022457               | 0.046999  | 1.309223  |
| 46               | 1                | 0              | -5.525135               | -0.427667 | 2.115213  |
| 47               | 7                | 0              | -3.458623               | 0.053340  | -0.356410 |
| 48               | 1                | 0              | -1.821014               | -1.258477 | -0.394773 |
| 49               | 6                | 0              | -3.902890               | -2.175794 | -1.320390 |
| 50               | 1                | 0              | -4.272917               | -1.702183 | -2.233248 |
| 51               | 1                | 0              | -2.853792               | -2.435893 | -1.472316 |
| 52               | 1                | 0              | -4.447768               | -3.109750 | -1.167641 |
| 53               | 6                | 0              | -3.352614               | 2.537825  | -0.012890 |
| 54               | 1                | 0              | -2.451281               | 2.929057  | 0.459333  |
| 55               | 1                | 0              | -3.183287               | 2.460988  | -1.089766 |
| 56               | 1                | 0              | -4.135326               | 3.282224  | 0.144398  |
| 57               | 1                | 0              | 2.430345                | 4.195931  | -0.308044 |

## Structure 22d (vacuum)

Energy (Hartrees): = -1191.3888113  
 No imaginary frequencies

## Standard orientation:

| Center<br>Number | Atomic<br>Number | Atomic<br>Type | Coordinates (Angstroms) |           |           |
|------------------|------------------|----------------|-------------------------|-----------|-----------|
|                  |                  |                | X                       | Y         | Z         |
| 1                | 6                | 0              | 2.050417                | -1.794709 | 0.406005  |
| 2                | 6                | 0              | 2.978439                | -0.906663 | -0.026543 |
| 3                | 6                | 0              | 2.596768                | 0.503456  | -0.141560 |
| 4                | 6                | 0              | 1.238098                | 0.892258  | -0.005668 |
| 5                | 6                | 0              | 0.222328                | -0.118979 | 0.276048  |
| 6                | 6                | 0              | 0.638394                | -1.454240 | 0.593844  |
| 7                | 6                | 0              | 4.395544                | -1.378624 | -0.307068 |
| 8                | 6                | 0              | 0.955564                | 2.274823  | -0.061134 |
| 9                | 6                | 0              | 1.942740                | 3.217825  | -0.269194 |
| 10               | 6                | 0              | 3.278481                | 2.836673  | -0.405314 |
| 11               | 6                | 0              | 3.582473                | 1.491969  | -0.335623 |
| 12               | 6                | 0              | 4.442665                | -2.550454 | -1.298472 |



|    |   |   |           |           |           |
|----|---|---|-----------|-----------|-----------|
| 13 | 6 | 0 | 5.123655  | -1.718806 | 1.000039  |
| 14 | 6 | 0 | 4.346076  | 3.880466  | -0.603606 |
| 15 | 6 | 0 | -1.147618 | 0.107681  | 0.156814  |
| 16 | 1 | 0 | -1.502368 | 1.036205  | -0.265520 |
| 17 | 1 | 0 | 4.622928  | 1.208415  | -0.402347 |
| 18 | 1 | 0 | 4.936286  | -0.566277 | -0.790667 |
| 19 | 1 | 0 | 5.483022  | -2.762597 | -1.558685 |
| 20 | 1 | 0 | 3.906112  | -2.300836 | -2.216498 |
| 21 | 1 | 0 | 4.001869  | -3.450721 | -0.874527 |
| 22 | 1 | 0 | 6.155198  | -2.017019 | 0.795001  |
| 23 | 1 | 0 | 5.140180  | -0.857164 | 1.671719  |
| 24 | 1 | 0 | 4.619418  | -2.542949 | 1.508037  |
| 25 | 8 | 0 | 2.326035  | -3.092202 | 0.658843  |
| 26 | 1 | 0 | 1.466088  | -3.476276 | 0.906956  |
| 27 | 8 | 0 | -0.123862 | -2.384681 | 0.940065  |
| 28 | 1 | 0 | 5.328094  | 3.420461  | -0.717136 |
| 29 | 1 | 0 | 4.387735  | 4.563696  | 0.248580  |
| 30 | 1 | 0 | 4.146368  | 4.478160  | -1.496563 |
| 31 | 8 | 0 | -0.343127 | 2.686527  | 0.117200  |
| 32 | 1 | 0 | -0.354031 | 3.646280  | 0.157061  |
| 33 | 7 | 0 | -2.096330 | -0.740481 | 0.523738  |
| 34 | 6 | 0 | -3.917777 | 0.801115  | 0.736048  |
| 35 | 6 | 0 | -3.778786 | -0.801608 | -1.146760 |
| 36 | 6 | 0 | -5.436627 | 0.862508  | 0.582658  |
| 37 | 1 | 0 | -3.490957 | 1.597337  | 0.099758  |
| 38 | 6 | 0 | -5.292109 | -0.724881 | -1.334638 |
| 39 | 1 | 0 | -3.300754 | -0.030884 | -1.779449 |
| 40 | 6 | 0 | -5.857703 | 0.608522  | -0.860453 |
| 41 | 1 | 0 | -5.781884 | 1.842836  | 0.921439  |
| 42 | 1 | 0 | -5.878244 | 0.107817  | 1.242688  |
| 43 | 1 | 0 | -5.522077 | -0.893582 | -2.389976 |
| 44 | 1 | 0 | -5.745205 | -1.543092 | -0.763749 |
| 45 | 1 | 0 | -6.946250 | 0.618041  | -0.952208 |
| 46 | 1 | 0 | -5.474804 | 1.414590  | -1.497308 |
| 47 | 7 | 0 | -3.463440 | -0.526777 | 0.273792  |
| 48 | 1 | 0 | -1.818466 | -1.636898 | 0.917196  |
| 49 | 6 | 0 | -3.499013 | 1.038827  | 2.181391  |
| 50 | 1 | 0 | -3.805596 | 0.190641  | 2.798168  |
| 51 | 1 | 0 | -2.421412 | 1.171053  | 2.283174  |
| 52 | 1 | 0 | -3.987560 | 1.939517  | 2.557814  |
| 53 | 6 | 0 | -3.257821 | -2.176545 | -1.546918 |
| 54 | 1 | 0 | -2.170189 | -2.238238 | -1.501689 |
| 55 | 1 | 0 | -3.673475 | -2.934966 | -0.878327 |
| 56 | 1 | 0 | -3.570924 | -2.404103 | -2.567501 |
| 57 | 1 | 0 | 1.671781  | 4.270515  | -0.306410 |

### Structure 22d (CHCl<sub>3</sub>)

Energy (Hartrees): = -1191.41722  
No imaginary frequencies

Standard orientation:

| Center Number | Atomic Number | Atomic Type | Coordinates (Angstroms) |           |           |
|---------------|---------------|-------------|-------------------------|-----------|-----------|
|               |               |             | X                       | Y         | Z         |
| 1             | 6             | 0           | 2.050667                | -1.798128 | 0.393042  |
| 2             | 6             | 0           | 2.987596                | -0.910002 | -0.023443 |
| 3             | 6             | 0           | 2.606898                | 0.499544  | -0.145999 |
| 4             | 6             | 0           | 1.245163                | 0.887545  | -0.019307 |
| 5             | 6             | 0           | 0.226836                | -0.124243 | 0.254817  |
| 6             | 6             | 0           | 0.638516                | -1.457295 | 0.569442  |
| 7             | 6             | 0           | 4.409472                | -1.383645 | -0.283862 |
| 8             | 6             | 0           | 0.962642                | 2.273770  | -0.080025 |
| 9             | 6             | 0           | 1.953114                | 3.215934  | -0.278855 |
| 10            | 6             | 0           | 3.290807                | 2.833444  | -0.409103 |
| 11            | 6             | 0           | 3.595953                | 1.488487  | -0.336887 |
| 12            | 6             | 0           | 4.473279                | -2.546906 | -1.283793 |
| 13            | 6             | 0           | 5.120465                | -1.734824 | 1.029061  |
| 14            | 6             | 0           | 4.358273                | 3.877393  | -0.603696 |
| 15            | 6             | 0           | -1.150149               | 0.110246  | 0.136439  |
| 16            | 1             | 0           | -1.501087               | 1.039198  | -0.287033 |
| 17            | 1             | 0           | 4.637373                | 1.206693  | -0.400345 |
| 18            | 1             | 0           | 4.961719                | -0.569630 | -0.750431 |
| 19            | 1             | 0           | 5.518138                | -2.754933 | -1.530701 |
| 20            | 1             | 0           | 3.951672                | -2.293306 | -2.210207 |
| 21            | 1             | 0           | 4.030348                | -3.455270 | -0.877507 |
| 22            | 1             | 0           | 6.154279                | -2.032446 | 0.832458  |
| 23            | 1             | 0           | 5.135019                | -0.878430 | 1.708219  |
| 24            | 1             | 0           | 4.614367                | -2.562256 | 1.531092  |
| 25            | 8             | 0           | 2.326126                | -3.097914 | 0.644226  |
| 26            | 1             | 0           | 1.466200                | -3.490085 | 0.883221  |
| 27            | 8             | 0           | -0.127069               | -2.391578 | 0.912101  |
| 28            | 1             | 0           | 5.342776                | 3.418878  | -0.705578 |
| 29            | 1             | 0           | 4.389558                | 4.568270  | 0.243230  |
| 30            | 1             | 0           | 4.165452                | 4.470591  | -1.501746 |

|    |   |   |           |           |           |
|----|---|---|-----------|-----------|-----------|
| 31 | 8 | 0 | -0.332883 | 2.681705  | 0.085301  |
| 32 | 1 | 0 | -0.359254 | 3.645598  | 0.102644  |
| 33 | 7 | 0 | -2.096718 | -0.732005 | 0.501196  |
| 34 | 6 | 0 | -3.898640 | 0.842433  | 0.702385  |
| 35 | 6 | 0 | -3.828301 | -0.843896 | -1.114670 |
| 36 | 6 | 0 | -5.420432 | 0.913787  | 0.584929  |
| 37 | 1 | 0 | -3.480270 | 1.601581  | 0.019858  |
| 38 | 6 | 0 | -5.345283 | -0.758845 | -1.263340 |
| 39 | 1 | 0 | -3.357746 | -0.104384 | -1.786274 |
| 40 | 6 | 0 | -5.883861 | 0.600020  | -0.833121 |
| 41 | 1 | 0 | -5.742306 | 1.914146  | 0.886054  |
| 42 | 1 | 0 | -5.855299 | 0.197120  | 1.290955  |
| 43 | 1 | 0 | -5.603844 | -0.969899 | -2.304402 |
| 44 | 1 | 0 | -5.792281 | -1.546390 | -0.645854 |
| 45 | 1 | 0 | -6.974820 | 0.615227  | -0.892404 |
| 46 | 1 | 0 | -5.512195 | 1.372892  | -1.516173 |
| 47 | 7 | 0 | -3.471237 | -0.512990 | 0.287158  |
| 48 | 1 | 0 | -1.824275 | -1.628560 | 0.898654  |
| 49 | 6 | 0 | -3.445728 | 1.135950  | 2.126592  |
| 50 | 1 | 0 | -3.747288 | 0.320876  | 2.789919  |
| 51 | 1 | 0 | -2.365165 | 1.264423  | 2.206164  |
| 52 | 1 | 0 | -3.917565 | 2.057751  | 2.473434  |
| 53 | 6 | 0 | -3.332701 | -2.239478 | -1.471163 |
| 54 | 1 | 0 | -2.243942 | -2.308864 | -1.469229 |
| 55 | 1 | 0 | -3.726416 | -2.968889 | -0.757324 |
| 56 | 1 | 0 | -3.685407 | -2.508556 | -2.468915 |
| 57 | 1 | 0 | 1.681034  | 4.268163  | -0.309934 |

### Structure 22d (DMSO)

Energy (Hartrees): = -1191.411896  
No imaginary frequencies

Standard orientation:

| Center<br>Number | Atomic<br>Number | Atomic<br>Type | Coordinates (Angstroms) |           |           |
|------------------|------------------|----------------|-------------------------|-----------|-----------|
|                  |                  |                | X                       | Y         | Z         |
| 1                | 6                | 0              | -2.100769               | -1.822192 | -0.219559 |
| 2                | 6                | 0              | -3.021793               | -0.868915 | 0.065417  |
| 3                | 6                | 0              | -2.592787               | 0.532252  | 0.073821  |
| 4                | 6                | 0              | -1.212423               | 0.866755  | -0.021164 |
| 5                | 6                | 0              | -0.217572               | -0.200235 | -0.154267 |
| 6                | 6                | 0              | -0.667399               | -1.546881 | -0.335452 |
| 7                | 6                | 0              | -4.474413               | -1.257869 | 0.289697  |
| 8                | 6                | 0              | -0.891396               | 2.247085  | -0.046012 |
| 9                | 6                | 0              | -1.859789               | 3.229947  | 0.034999  |
| 10               | 6                | 0              | -3.213906               | 2.898527  | 0.122924  |
| 11               | 6                | 0              | -3.557586               | 1.560695  | 0.139380  |
| 12               | 6                | 0              | -4.650876               | -2.366031 | 1.336862  |
| 13               | 6                | 0              | -5.145869               | -1.631598 | -1.036923 |
| 14               | 6                | 0              | -4.254754               | 3.983861  | 0.182904  |
| 15               | 6                | 0              | 1.166276                | 0.004498  | -0.048555 |
| 16               | 1                | 0              | 1.547896                | 0.989524  | 0.174025  |
| 17               | 1                | 0              | -4.609656               | 1.315839  | 0.176218  |
| 18               | 1                | 0              | -4.998465               | -0.393918 | 0.693550  |
| 19               | 1                | 0              | -5.713989               | -2.475044 | 1.568115  |
| 20               | 1                | 0              | -4.129478               | -2.114270 | 2.264187  |
| 21               | 1                | 0              | -4.277445               | -3.325671 | 0.982739  |
| 22               | 1                | 0              | -6.203031               | -1.860788 | -0.876678 |
| 23               | 1                | 0              | -5.080738               | -0.810688 | -1.756115 |
| 24               | 1                | 0              | -4.666619               | -2.510775 | -1.474542 |
| 25               | 8                | 0              | -2.406720               | -3.129851 | -0.371018 |
| 26               | 1                | 0              | -1.543709               | -3.559068 | -0.518272 |
| 27               | 8                | 0              | 0.073742                | -2.539855 | -0.534453 |
| 28               | 1                | 0              | -5.254476               | 3.562624  | 0.297507  |
| 29               | 1                | 0              | -4.241029               | 4.589581  | -0.727440 |
| 30               | 1                | 0              | -4.067205               | 4.656602  | 1.023863  |
| 31               | 8                | 0              | 0.418787                | 2.611552  | -0.169065 |
| 32               | 1                | 0              | 0.473841                | 3.574626  | -0.207032 |
| 33               | 7                | 0              | 2.089038                | -0.929247 | -0.173018 |
| 34               | 6                | 0              | 3.940934                | 0.209211  | -1.138169 |
| 35               | 6                | 0              | 3.787496                | -0.159456 | 1.316819  |
| 36               | 6                | 0              | 5.454772                | 0.366069  | -1.021124 |
| 37               | 1                | 0              | 3.477420                | 1.204864  | -1.034926 |
| 38               | 6                | 0              | 5.301759                | -0.007133 | 1.435544  |
| 39               | 1                | 0              | 3.331486                | 0.834629  | 1.457111  |
| 40               | 6                | 0              | 5.862398                | 0.899444  | 0.346639  |
| 41               | 1                | 0              | 5.793540                | 1.031909  | -1.819122 |
| 42               | 1                | 0              | 5.916148                | -0.614247 | -1.189801 |
| 43               | 1                | 0              | 5.528688                | 0.387545  | 2.429377  |
| 44               | 1                | 0              | 5.756685                | -1.002145 | 1.362467  |
| 45               | 1                | 0              | 6.950474                | 0.964650  | 0.424175  |
| 46               | 1                | 0              | 5.464944                | 1.912729  | 0.476163  |
| 47               | 7                | 0              | 3.468571                | -0.669437 | -0.039256 |
| 48               | 1                | 0              | 1.806952                | -1.883200 | -0.381329 |

|    |   |   |           |           |           |
|----|---|---|-----------|-----------|-----------|
| 49 | 6 | 0 | 3.565043  | -0.389138 | -2.486776 |
| 50 | 1 | 0 | 3.953340  | -1.408748 | -2.565636 |
| 51 | 1 | 0 | 2.485521  | -0.416551 | -2.643420 |
| 52 | 1 | 0 | 4.005754  | 0.210584  | -3.286018 |
| 53 | 6 | 0 | 3.257853  | -1.116398 | 2.375651  |
| 54 | 1 | 0 | 2.167877  | -1.169189 | 2.381558  |
| 55 | 1 | 0 | 3.653474  | -2.121367 | 2.202826  |
| 56 | 1 | 0 | 3.583577  | -0.781832 | 3.362917  |
| 57 | 1 | 0 | -1.552699 | 4.272816  | 0.009795  |

### Structure 23 (vacuum)

Energy (Hartrees): = -1245.0083025  
No imaginary frequencies

Standard orientation:

| Center<br>Number | Atomic<br>Number | Atomic<br>Type | Coordinates (Angstroms) |           |           |
|------------------|------------------|----------------|-------------------------|-----------|-----------|
|                  |                  |                | X                       | Y         | Z         |
| 1                | 6                | 0              | -1.825275               | -1.860108 | -0.121103 |
| 2                | 6                | 0              | -2.867445               | -0.989817 | 0.054152  |
| 3                | 6                | 0              | -2.581788               | 0.425996  | 0.053858  |
| 4                | 6                | 0              | -1.233166               | 0.891025  | -0.022652 |
| 5                | 6                | 0              | -0.152888               | -0.064917 | -0.090045 |
| 6                | 6                | 0              | -0.476801               | -1.410157 | -0.185583 |
| 7                | 6                | 0              | -4.275069               | -1.546381 | 0.194998  |
| 8                | 6                | 0              | -1.042576               | 2.301078  | -0.097055 |
| 9                | 6                | 0              | -2.094059               | 3.181488  | -0.043265 |
| 10               | 6                | 0              | -3.418480               | 2.725128  | 0.059379  |
| 11               | 6                | 0              | -3.639050               | 1.372677  | 0.099557  |
| 12               | 6                | 0              | -4.404899               | -2.522103 | 1.374271  |
| 13               | 6                | 0              | -4.754449               | -2.177451 | -1.119518 |
| 14               | 6                | 0              | -4.548690               | 3.718004  | 0.103055  |
| 15               | 6                | 0              | 1.263809                | 0.274481  | 0.020468  |
| 16               | 1                | 0              | 1.510924                | 1.298347  | 0.276634  |
| 17               | 1                | 0              | -4.662873               | 1.033591  | 0.141770  |
| 18               | 1                | 0              | -4.948952               | -0.723182 | 0.420369  |
| 19               | 1                | 0              | -5.457228               | -2.780899 | 1.516054  |
| 20               | 1                | 0              | -4.040639               | -2.064485 | 2.296699  |
| 21               | 1                | 0              | -3.845830               | -3.439160 | 1.197934  |
| 22               | 1                | 0              | -5.785909               | -2.523369 | -1.014990 |
| 23               | 1                | 0              | -4.716511               | -1.450988 | -1.934513 |
| 24               | 1                | 0              | -4.130673               | -3.031205 | -1.387008 |
| 25               | 8                | 0              | -2.020664               | -3.199354 | -0.210893 |
| 26               | 1                | 0              | -1.148724               | -3.607394 | -0.298747 |
| 27               | 8                | 0              | 0.423709                | -2.389977 | -0.302371 |
| 28               | 1                | 0              | 1.333165                | -1.946148 | -0.308892 |
| 29               | 1                | 0              | -5.512735               | 3.213235  | 0.168130  |
| 30               | 1                | 0              | -4.552012               | 4.345045  | -0.792251 |
| 31               | 1                | 0              | -4.452805               | 4.379511  | 0.967921  |
| 32               | 8                | 0              | 0.231951                | 2.781187  | -0.249886 |
| 33               | 1                | 0              | 0.186995                | 3.733911  | -0.366893 |
| 34               | 7                | 0              | 2.182916                | -0.608988 | -0.143322 |
| 35               | 1                | 0              | -1.895073               | 4.248746  | -0.102397 |
| 36               | 6                | 0              | 3.586603                | -0.223230 | -0.000392 |
| 37               | 6                | 0              | 3.926694                | 0.841404  | -1.063688 |
| 38               | 1                | 0              | 3.351103                | 1.755249  | -0.866419 |
| 39               | 1                | 0              | 3.624033                | 0.462841  | -2.042689 |
| 40               | 6                | 0              | 3.850672                | 0.302969  | 1.424633  |
| 41               | 1                | 0              | 3.607666                | -0.489760 | 2.143551  |
| 42               | 1                | 0              | 3.198850                | 1.153858  | 1.633684  |
| 43               | 6                | 0              | 4.386926                | -1.512652 | -0.251698 |
| 44               | 1                | 0              | 4.179535                | -1.860833 | -1.271465 |
| 45               | 1                | 0              | 4.033235                | -2.278744 | 0.442509  |
| 46               | 8                | 0              | 5.312142                | 1.127060  | -1.142562 |
| 47               | 1                | 0              | 5.563285                | 1.468324  | -0.274174 |
| 48               | 8                | 0              | 5.177790                | 0.768641  | 1.604624  |
| 49               | 1                | 0              | 5.749781                | 0.003194  | 1.458470  |
| 50               | 8                | 0              | 5.780234                | -1.371987 | -0.031030 |
| 51               | 1                | 0              | 6.089254                | -0.725946 | -0.679317 |

### Structure 23 (CHCl<sub>3</sub>)

Energy (Hartrees): = -1245.0351186  
No imaginary frequencies

Standard orientation:

| Center<br>Number | Atomic<br>Number | Atomic<br>Type | Coordinates (Angstroms) |           |           |
|------------------|------------------|----------------|-------------------------|-----------|-----------|
|                  |                  |                | X                       | Y         | Z         |
| 1                | 6                | 0              | -1.811140               | -1.859106 | -0.133947 |
| 2                | 6                | 0              | -2.860989               | -0.996608 | 0.042751  |
| 3                | 6                | 0              | -2.585946               | 0.422410  | 0.048557  |

|    |   |   |           |           |           |
|----|---|---|-----------|-----------|-----------|
| 4  | 6 | 0 | -1.241728 | 0.896141  | -0.056589 |
| 5  | 6 | 0 | -0.153609 | -0.050309 | -0.127690 |
| 6  | 6 | 0 | -0.465871 | -1.399469 | -0.208464 |
| 7  | 6 | 0 | -4.264940 | -1.564868 | 0.186189  |
| 8  | 6 | 0 | -1.058360 | 2.307578  | -0.156626 |
| 9  | 6 | 0 | -2.111804 | 3.184431  | -0.070538 |
| 10 | 6 | 0 | -3.429115 | 2.719969  | 0.090677  |
| 11 | 6 | 0 | -3.645684 | 1.365511  | 0.137927  |
| 12 | 6 | 0 | -4.393044 | -2.505987 | 1.392439  |
| 13 | 6 | 0 | -4.731762 | -2.239146 | -1.111015 |
| 14 | 6 | 0 | -4.558305 | 3.709818  | 0.186220  |
| 15 | 6 | 0 | 1.262086  | 0.300907  | -0.002889 |
| 16 | 1 | 0 | 1.505730  | 1.322452  | 0.266348  |
| 17 | 1 | 0 | -4.666270 | 1.025321  | 0.227349  |
| 18 | 1 | 0 | -4.952487 | -0.744666 | 0.376192  |
| 19 | 1 | 0 | -5.442022 | -2.782701 | 1.529104  |
| 20 | 1 | 0 | -4.053559 | -2.014645 | 2.307761  |
| 21 | 1 | 0 | -3.814397 | -3.418890 | 1.255695  |
| 22 | 1 | 0 | -5.763699 | -2.583938 | -1.002484 |
| 23 | 1 | 0 | -4.694701 | -1.537399 | -1.948086 |
| 24 | 1 | 0 | -4.107608 | -3.099874 | -1.355048 |
| 25 | 8 | 0 | -1.998535 | -3.200569 | -0.211566 |
| 26 | 1 | 0 | -1.126998 | -3.613676 | -0.296409 |
| 27 | 8 | 0 | 0.445167  | -2.370432 | -0.317249 |
| 28 | 1 | 0 | 1.353083  | -1.909554 | -0.323970 |
| 29 | 1 | 0 | -5.517668 | 3.204623  | 0.304409  |
| 30 | 1 | 0 | -4.608100 | 4.332163  | -0.711596 |
| 31 | 1 | 0 | -4.416842 | 4.379040  | 1.039210  |
| 32 | 8 | 0 | 0.204950  | 2.779738  | -0.367506 |
| 33 | 1 | 0 | 0.166648  | 3.735895  | -0.489777 |
| 34 | 7 | 0 | 2.181067  | -0.581907 | -0.162630 |
| 35 | 1 | 0 | -1.919711 | 4.251566  | -0.149936 |
| 36 | 6 | 0 | 3.586702  | -0.210564 | 0.005567  |
| 37 | 6 | 0 | 3.945974  | 0.866927  | -1.036249 |
| 38 | 1 | 0 | 3.391563  | 1.788999  | -0.820655 |
| 39 | 1 | 0 | 3.639265  | 0.512788  | -2.023190 |
| 40 | 6 | 0 | 3.828368  | 0.291467  | 1.442083  |
| 41 | 1 | 0 | 3.577765  | -0.511862 | 2.145889  |
| 42 | 1 | 0 | 3.174200  | 1.140046  | 1.653200  |
| 43 | 6 | 0 | 4.372545  | -1.505695 | -0.256247 |
| 44 | 1 | 0 | 4.186601  | -1.828115 | -1.288406 |
| 45 | 1 | 0 | 3.993380  | -2.280820 | 0.414291  |
| 46 | 8 | 0 | 5.339755  | 1.128037  | -1.108971 |
| 47 | 1 | 0 | 5.595497  | 1.468924  | -0.241265 |
| 48 | 8 | 0 | 5.155756  | 0.754721  | 1.650038  |
| 49 | 1 | 0 | 5.732016  | -0.010577 | 1.518648  |
| 50 | 8 | 0 | 5.765002  | -1.392436 | -0.000832 |
| 51 | 1 | 0 | 6.103832  | -0.744671 | -0.633118 |

### Structure 23 (DMSO)

Energy (Hartrees): = -1245.0334552  
No imaginary frequencies

Standard orientation:

| Center Number | Atomic Number | Atomic Type | Coordinates (Angstroms) |           |           |
|---------------|---------------|-------------|-------------------------|-----------|-----------|
|               |               |             | X                       | Y         | Z         |
| 1             | 6             | 0           | -1.789567               | -1.858663 | -0.148919 |
| 2             | 6             | 0           | -2.847059               | -1.012081 | 0.055095  |
| 3             | 6             | 0           | -2.590974               | 0.410926  | 0.054078  |
| 4             | 6             | 0           | -1.252412               | 0.903417  | -0.041227 |
| 5             | 6             | 0           | -0.152399               | -0.029050 | -0.123930 |
| 6             | 6             | 0           | -0.449629               | -1.380763 | -0.229112 |
| 7             | 6             | 0           | -4.242026               | -1.593213 | 0.228186  |
| 8             | 6             | 0           | -1.087039               | 2.318259  | -0.124058 |
| 9             | 6             | 0           | -2.154736               | 3.180086  | -0.052284 |
| 10            | 6             | 0           | -3.468690               | 2.695490  | 0.075449  |
| 11            | 6             | 0           | -3.667247               | 1.337257  | 0.119661  |
| 12            | 6             | 0           | -4.325782               | -2.581932 | 1.398978  |
| 13            | 6             | 0           | -4.748735               | -2.218986 | -1.077092 |
| 14            | 6             | 0           | -4.614492               | 3.667876  | 0.135748  |
| 15            | 6             | 0           | 1.261531                | 0.332642  | 0.003327  |
| 16            | 1             | 0           | 1.502760                | 1.348575  | 0.294840  |
| 17            | 1             | 0           | -4.685607               | 0.982526  | 0.178426  |
| 18            | 1             | 0           | -4.923268               | -0.784447 | 0.480430  |
| 19            | 1             | 0           | -5.370999               | -2.855474 | 1.567006  |
| 20            | 1             | 0           | -3.946670               | -2.129759 | 2.319215  |
| 21            | 1             | 0           | -3.760319               | -3.492283 | 1.203470  |
| 22            | 1             | 0           | -5.772714               | -2.579771 | -0.947806 |
| 23            | 1             | 0           | -4.747424               | -1.484165 | -1.886491 |
| 24            | 1             | 0           | -4.123948               | -3.063234 | -1.374854 |
| 25            | 8             | 0           | -1.958330               | -3.201093 | -0.248443 |
| 26            | 1             | 0           | -1.079379               | -3.594379 | -0.347687 |
| 27            | 8             | 0           | 0.471483                | -2.336242 | -0.364205 |

|    |   |   |           |           |           |
|----|---|---|-----------|-----------|-----------|
| 28 | 1 | 0 | 1.376425  | -1.855420 | -0.361306 |
| 29 | 1 | 0 | -5.567769 | 3.148256  | 0.240464  |
| 30 | 1 | 0 | -4.653488 | 4.278871  | -0.770362 |
| 31 | 1 | 0 | -4.500106 | 4.351003  | 0.981668  |
| 32 | 8 | 0 | 0.171744  | 2.808592  | -0.305567 |
| 33 | 1 | 0 | 0.124696  | 3.770469  | -0.378758 |
| 34 | 7 | 0 | 2.180743  | -0.545473 | -0.179412 |
| 35 | 1 | 0 | -1.976672 | 4.250497  | -0.120867 |
| 36 | 6 | 0 | 3.588765  | -0.190773 | -0.002037 |
| 37 | 6 | 0 | 3.963009  | 0.898097  | -1.025633 |
| 38 | 1 | 0 | 3.409806  | 1.818702  | -0.803762 |
| 39 | 1 | 0 | 3.670276  | 0.557292  | -2.021422 |
| 40 | 6 | 0 | 3.829273  | 0.284528  | 1.443031  |
| 41 | 1 | 0 | 3.548241  | -0.522660 | 2.130839  |
| 42 | 1 | 0 | 3.200214  | 1.150187  | 1.659682  |
| 43 | 6 | 0 | 4.359168  | -1.491641 | -0.282921 |
| 44 | 1 | 0 | 4.158484  | -1.801303 | -1.316112 |
| 45 | 1 | 0 | 3.980963  | -2.269225 | 0.385178  |
| 46 | 8 | 0 | 5.361007  | 1.156505  | -1.073589 |
| 47 | 1 | 0 | 5.603419  | 1.464023  | -0.189828 |
| 48 | 8 | 0 | 5.171059  | 0.700675  | 1.668777  |
| 49 | 1 | 0 | 5.720458  | -0.075170 | 1.491893  |
| 50 | 8 | 0 | 5.758074  | -1.392130 | -0.044840 |
| 51 | 1 | 0 | 6.081366  | -0.714110 | -0.653082 |

### Structure 24 (vacuum)

Energy (Hartrees): = -1245.011005  
 No imaginary frequencies

Standard orientation:

| Center<br>Number | Atomic<br>Number | Atomic<br>Type | Coordinates (Angstroms) |           |           |
|------------------|------------------|----------------|-------------------------|-----------|-----------|
|                  |                  |                | X                       | Y         | Z         |
| 1                | 6                | 0              | -1.862295               | -1.875238 | -0.180198 |
| 2                | 6                | 0              | -2.868409               | -1.007718 | 0.085502  |
| 3                | 6                | 0              | -2.577934               | 0.428247  | 0.065646  |
| 4                | 6                | 0              | -1.238441               | 0.894145  | -0.026685 |
| 5                | 6                | 0              | -0.145063               | -0.073580 | -0.130477 |
| 6                | 6                | 0              | -0.464200               | -1.464753 | -0.297336 |
| 7                | 6                | 0              | -4.273534               | -1.538041 | 0.319360  |
| 8                | 6                | 0              | -1.052352               | 2.293367  | -0.088574 |
| 9                | 6                | 0              | -2.110958               | 3.179447  | -0.043321 |
| 10               | 6                | 0              | -3.425968               | 2.721325  | 0.039734  |
| 11               | 6                | 0              | -3.636072               | 1.358266  | 0.090671  |
| 12               | 6                | 0              | -4.328969               | -2.613944 | 1.413991  |
| 13               | 6                | 0              | -4.886378               | -2.040991 | -0.994689 |
| 14               | 6                | 0              | -4.569193               | 3.700978  | 0.067676  |
| 15               | 6                | 0              | 1.202385                | 0.258587  | -0.009416 |
| 16               | 1                | 0              | 1.476114                | 1.277015  | 0.220255  |
| 17               | 1                | 0              | -4.658041               | 1.009523  | 0.119305  |
| 18               | 1                | 0              | -4.890670               | -0.719493 | 0.685948  |
| 19               | 1                | 0              | -5.373096               | -2.849241 | 1.635240  |
| 20               | 1                | 0              | -3.859659               | -2.254912 | 2.332552  |
| 21               | 1                | 0              | -3.826382               | -3.527770 | 1.103691  |
| 22               | 1                | 0              | -5.910337               | -2.385980 | -0.829940 |
| 23               | 1                | 0              | -4.905674               | -1.247082 | -1.745065 |
| 24               | 1                | 0              | -4.300118               | -2.873605 | -1.387628 |
| 25               | 8                | 0              | -2.045425               | -3.207095 | -0.306360 |
| 26               | 1                | 0              | -1.150209               | -3.563707 | -0.443796 |
| 27               | 8                | 0              | 0.373413                | -2.379864 | -0.474360 |
| 28               | 1                | 0              | -4.539988               | 4.362401  | -0.801593 |
| 29               | 1                | 0              | -4.522882               | 4.328271  | 0.961567  |
| 30               | 1                | 0              | -5.528805               | 3.183671  | 0.068240  |
| 31               | 8                | 0              | 0.224202                | 2.785044  | -0.210500 |
| 32               | 1                | 0              | 0.173387                | 3.738237  | -0.319583 |
| 33               | 7                | 0              | 2.211491                | -0.598419 | -0.134824 |
| 34               | 1                | 0              | -1.910039               | 4.247049  | -0.092780 |
| 35               | 6                | 0              | 3.615570                | -0.229624 | 0.008101  |
| 36               | 6                | 0              | 3.957250                | 0.862407  | -1.027491 |
| 37               | 1                | 0              | 3.384061                | 1.772685  | -0.810206 |
| 38               | 1                | 0              | 3.656132                | 0.507198  | -2.015259 |
| 39               | 6                | 0              | 3.866592                | 0.256802  | 1.449613  |
| 40               | 1                | 0              | 3.652202                | -0.566840 | 2.141430  |
| 41               | 1                | 0              | 3.181172                | 1.074824  | 1.682517  |
| 42               | 6                | 0              | 4.417726                | -1.511183 | -0.277355 |
| 43               | 1                | 0              | 4.236220                | -1.822882 | -1.314097 |
| 44               | 1                | 0              | 4.057637                | -2.305355 | 0.382086  |
| 45               | 8                | 0              | 5.342722                | 1.145659  | -1.094333 |
| 46               | 1                | 0              | 5.587565                | 1.494588  | -0.227278 |
| 47               | 8                | 0              | 5.173466                | 0.767025  | 1.641835  |
| 48               | 1                | 0              | 5.773002                | 0.020316  | 1.514668  |
| 49               | 8                | 0              | 5.799730                | -1.365124 | -0.020291 |
| 50               | 1                | 0              | 6.121000                | -0.703978 | -0.647484 |
| 51               | 1                | 0              | 1.933563                | -1.562163 | -0.345455 |

-----  
**Structure 24 (CHCl3)**

Energy (Hartrees): = -1245.0405081  
 No imaginary frequencies

Standard orientation:

| Center<br>Number | Atomic<br>Number | Atomic<br>Type | Coordinates (Angstroms) |           |           |
|------------------|------------------|----------------|-------------------------|-----------|-----------|
|                  |                  |                | X                       | Y         | Z         |
| 1                | 6                | 0              | -1.869977               | -1.869455 | -0.203950 |
| 2                | 6                | 0              | -2.873746               | -0.998715 | 0.068454  |
| 3                | 6                | 0              | -2.577522               | 0.436704  | 0.052497  |
| 4                | 6                | 0              | -1.237106               | 0.892404  | -0.085488 |
| 5                | 6                | 0              | -0.150002               | -0.079583 | -0.206695 |
| 6                | 6                | 0              | -0.473010               | -1.466357 | -0.358300 |
| 7                | 6                | 0              | -4.274882               | -1.534948 | 0.322192  |
| 8                | 6                | 0              | -1.041790               | 2.291648  | -0.178502 |
| 9                | 6                | 0              | -2.089969               | 3.187307  | -0.085556 |
| 10               | 6                | 0              | -3.403011               | 2.739560  | 0.074643  |
| 11               | 6                | 0              | -3.625572               | 1.377596  | 0.133502  |
| 12               | 6                | 0              | -4.312424               | -2.532476 | 1.488428  |
| 13               | 6                | 0              | -4.874529               | -2.138302 | -0.954593 |
| 14               | 6                | 0              | -4.531376               | 3.730213  | 0.182996  |
| 15               | 6                | 0              | 1.202549                | 0.253464  | -0.066061 |
| 16               | 1                | 0              | 1.473637                | 1.265883  | 0.193943  |
| 17               | 1                | 0              | -4.649106               | 1.042634  | 0.216160  |
| 18               | 1                | 0              | -4.915925               | -0.708386 | 0.620729  |
| 19               | 1                | 0              | -5.349494               | -2.806801 | 1.701145  |
| 20               | 1                | 0              | -3.890434               | -2.088757 | 2.393775  |
| 21               | 1                | 0              | -3.756459               | -3.440853 | 1.258585  |
| 22               | 1                | 0              | -5.901387               | -2.466428 | -0.770910 |
| 23               | 1                | 0              | -4.890984               | -1.402081 | -1.762381 |
| 24               | 1                | 0              | -4.292173               | -3.000489 | -1.284731 |
| 25               | 8                | 0              | -2.059590               | -3.204601 | -0.307413 |
| 26               | 1                | 0              | -1.169340               | -3.569496 | -0.462693 |
| 27               | 8                | 0              | 0.358504                | -2.388266 | -0.547583 |
| 28               | 1                | 0              | -4.482507               | 4.471976  | -0.618085 |
| 29               | 1                | 0              | -4.482591               | 4.270829  | 1.132661  |
| 30               | 1                | 0              | -5.499841               | 3.231214  | 0.128270  |
| 31               | 8                | 0              | 0.226601                | 2.761370  | -0.381297 |
| 32               | 1                | 0              | 0.190080                | 3.715725  | -0.515419 |
| 33               | 7                | 0              | 2.211501                | -0.592988 | -0.193365 |
| 34               | 1                | 0              | -1.882014               | 4.251994  | -0.159341 |
| 35               | 6                | 0              | 3.613793                | -0.229248 | 0.009677  |
| 36               | 6                | 0              | 3.972480                | 0.930670  | -0.940729 |
| 37               | 1                | 0              | 3.413262                | 1.831802  | -0.659875 |
| 38               | 1                | 0              | 3.678359                | 0.650343  | -1.954607 |
| 39               | 6                | 0              | 3.813105                | 0.162427  | 1.486422  |
| 40               | 1                | 0              | 3.600302                | -0.708817 | 2.117698  |
| 41               | 1                | 0              | 3.102847                | 0.950677  | 1.747384  |
| 42               | 6                | 0              | 4.424252                | -1.488237 | -0.339988 |
| 43               | 1                | 0              | 4.295834                | -1.713389 | -1.406320 |
| 44               | 1                | 0              | 4.031285                | -2.330454 | 0.236170  |
| 45               | 8                | 0              | 5.364697                | 1.200483  | -0.975958 |
| 46               | 1                | 0              | 5.602483                | 1.521392  | -0.095931 |
| 47               | 8                | 0              | 5.104143                | 0.686864  | 1.750682  |
| 48               | 1                | 0              | 5.724810                | -0.041301 | 1.614811  |
| 49               | 8                | 0              | 5.794483                | -1.371800 | -0.002953 |
| 50               | 1                | 0              | 6.155737                | -0.679806 | -0.573083 |
| 51               | 1                | 0              | 1.954821                | -1.556923 | -0.421932 |

-----  
**Structure 24 (DMSO)**

Energy (Hartrees): = -1245.0399931  
 No imaginary frequencies

Standard orientation:

| Center<br>Number | Atomic<br>Number | Atomic<br>Type | Coordinates (Angstroms) |           |           |
|------------------|------------------|----------------|-------------------------|-----------|-----------|
|                  |                  |                | X                       | Y         | Z         |
| 1                | 6                | 0              | -1.856151               | -1.875576 | -0.210692 |
| 2                | 6                | 0              | -2.858602               | -1.017689 | 0.102240  |
| 3                | 6                | 0              | -2.575166               | 0.419826  | 0.077596  |
| 4                | 6                | 0              | -1.239671               | 0.888691  | -0.059459 |
| 5                | 6                | 0              | -0.144960               | -0.074089 | -0.189635 |
| 6                | 6                | 0              | -0.461269               | -1.458436 | -0.366773 |
| 7                | 6                | 0              | -4.257887               | -1.544566 | 0.377262  |
| 8                | 6                | 0              | -1.059673               | 2.291088  | -0.149513 |
| 9                | 6                | 0              | -2.120240               | 3.174241  | -0.069676 |
| 10               | 6                | 0              | -3.430670               | 2.710760  | 0.074539  |
| 11               | 6                | 0              | -3.637987               | 1.346308  | 0.140671  |
| 12               | 6                | 0              | -4.291102               | -2.682902 | 1.405949  |

|    |   |   |           |           |           |
|----|---|---|-----------|-----------|-----------|
| 13 | 6 | 0 | -4.944442 | -1.953631 | -0.931103 |
| 14 | 6 | 0 | -4.572673 | 3.687570  | 0.154973  |
| 15 | 6 | 0 | 1.207877  | 0.266980  | -0.039756 |
| 16 | 1 | 0 | 1.471172  | 1.276652  | 0.239951  |
| 17 | 1 | 0 | -4.658409 | 0.996218  | 0.210832  |
| 18 | 1 | 0 | -4.840278 | -0.738941 | 0.821566  |
| 19 | 1 | 0 | -5.330852 | -2.896767 | 1.668383  |
| 20 | 1 | 0 | -3.765472 | -2.398287 | 2.321406  |
| 21 | 1 | 0 | -3.839207 | -3.595977 | 1.021422  |
| 22 | 1 | 0 | -5.966004 | -2.291909 | -0.736978 |
| 23 | 1 | 0 | -4.989255 | -1.114030 | -1.629879 |
| 24 | 1 | 0 | -4.397717 | -2.769841 | -1.410262 |
| 25 | 8 | 0 | -2.033916 | -3.208086 | -0.351187 |
| 26 | 1 | 0 | -1.136445 | -3.552087 | -0.514072 |
| 27 | 8 | 0 | 0.371855  | -2.374410 | -0.577331 |
| 28 | 1 | 0 | -4.525841 | 4.415049  | -0.659164 |
| 29 | 1 | 0 | -4.537791 | 4.248219  | 1.093539  |
| 30 | 1 | 0 | -5.533266 | 3.173195  | 0.103081  |
| 31 | 8 | 0 | 0.203445  | 2.773046  | -0.340063 |
| 32 | 1 | 0 | 0.161028  | 3.733058  | -0.433334 |
| 33 | 7 | 0 | 2.218150  | -0.572423 | -0.179374 |
| 34 | 1 | 0 | -1.925041 | 4.241318  | -0.144623 |
| 35 | 6 | 0 | 3.624421  | -0.214148 | 0.012658  |
| 36 | 6 | 0 | 4.006257  | 0.861188  | -1.023939 |
| 37 | 1 | 0 | 3.449233  | 1.784477  | -0.822718 |
| 38 | 1 | 0 | 3.725239  | 0.501287  | -2.015967 |
| 39 | 6 | 0 | 3.819030  | 0.286088  | 1.456333  |
| 40 | 1 | 0 | 3.574026  | -0.528925 | 2.147910  |
| 41 | 1 | 0 | 3.137196  | 1.115934  | 1.652031  |
| 42 | 6 | 0 | 4.414161  | -1.511710 | -0.228128 |
| 43 | 1 | 0 | 4.269587  | -1.829870 | -1.268236 |
| 44 | 1 | 0 | 4.016095  | -2.290409 | 0.427596  |
| 45 | 8 | 0 | 5.403062  | 1.119854  | -1.058024 |
| 46 | 1 | 0 | 5.627762  | 1.477164  | -0.188795 |
| 47 | 8 | 0 | 5.128944  | 0.783019  | 1.692580  |
| 48 | 1 | 0 | 5.721294  | 0.027257  | 1.585115  |
| 49 | 8 | 0 | 5.792559  | -1.383160 | 0.079443  |
| 50 | 1 | 0 | 6.142580  | -0.727740 | -0.538938 |
| 51 | 1 | 0 | 1.968225  | -1.530135 | -0.438872 |

### Structure 25ab (vacuum)

Energy (Hartrees): = -2224.3850487  
 No imaginary frequencies

Standard orientation:

| Center<br>Number | Atomic<br>Number | Atomic<br>Type | Coordinates (Angstroms) |           |           |
|------------------|------------------|----------------|-------------------------|-----------|-----------|
|                  |                  |                | X                       | Y         | Z         |
| 1                | 6                | 0              | 5.155216                | 2.550230  | -0.614868 |
| 2                | 6                | 0              | 4.101679                | 2.900000  | -1.417650 |
| 3                | 6                | 0              | 2.952637                | 2.032771  | -1.432609 |
| 4                | 6                | 0              | 2.936958                | 0.827371  | -0.658704 |
| 5                | 6                | 0              | 4.091025                | 0.468677  | 0.133141  |
| 6                | 6                | 0              | 5.155893                | 1.352398  | 0.148804  |
| 7                | 6                | 0              | -3.962851               | -5.374249 | -1.569098 |
| 8                | 6                | 0              | 0.603469                | -2.099011 | -2.975774 |
| 9                | 6                | 0              | 4.196639                | 4.180364  | -2.233752 |
| 10               | 6                | 0              | 1.732219                | 0.061016  | -0.693763 |
| 11               | 6                | 0              | 0.639476                | 0.417416  | -1.464803 |
| 12               | 6                | 0              | 0.681419                | 1.596927  | -2.247450 |
| 13               | 6                | 0              | 1.812907                | 2.367224  | -2.212626 |
| 14               | 6                | 0              | 5.338605                | 4.115026  | -3.258521 |
| 15               | 6                | 0              | 4.305908                | 5.422641  | -1.337724 |
| 16               | 6                | 0              | -0.506185               | 1.974470  | -3.093473 |
| 17               | 6                | 0              | 4.231964                | -0.800353 | 0.865744  |
| 18               | 6                | 0              | -4.216091               | 0.798770  | 0.726841  |
| 19               | 6                | 0              | -0.573249               | -0.453243 | -1.465672 |
| 20               | 6                | 0              | -0.604999               | -1.655700 | -2.192452 |
| 21               | 6                | 0              | -1.764942               | -2.403630 | -2.174406 |
| 22               | 6                | 0              | -2.913090               | -2.013117 | -1.457870 |
| 23               | 6                | 0              | -2.889778               | -0.808407 | -0.704317 |
| 24               | 6                | 0              | -1.692972               | -0.057691 | -0.736165 |
| 25               | 6                | 0              | -4.205462               | -4.086087 | -2.366274 |
| 26               | 6                | 0              | -5.531241               | -4.146822 | -3.138907 |
| 27               | 6                | 0              | -4.099576               | -2.870200 | -1.460640 |
| 28               | 6                | 0              | -5.090643               | -2.598878 | -0.577928 |
| 29               | 6                | 0              | -5.125811               | -1.384476 | 0.238667  |
| 30               | 6                | 0              | -4.051261               | -0.443421 | 0.107888  |
| 31               | 1                | 0              | -3.494617               | 1.591539  | 0.602432  |
| 32               | 1                | 0              | -1.764876               | -3.336038 | -2.720133 |
| 33               | 1                | 0              | 3.469185                | -1.548210 | 0.732018  |
| 34               | 1                | 0              | 1.818309                | 3.265487  | -2.810594 |
| 35               | 1                | 0              | -6.714892               | -2.914633 | 0.244521  |
| 36               | 1                | 0              | -3.997530               | -6.245400 | -2.228545 |

|     |   |   |           |           |           |
|-----|---|---|-----------|-----------|-----------|
| 37  | 1 | 0 | 3.280675  | 4.297397  | -2.807776 |
| 38  | 8 | 0 | -1.629689 | 1.104309  | -0.022657 |
| 39  | 1 | 0 | 5.334668  | 5.017600  | -3.875295 |
| 40  | 1 | 0 | 5.216619  | 3.251799  | -3.916640 |
| 41  | 1 | 0 | 6.306799  | 4.039817  | -2.764658 |
| 42  | 1 | 0 | 4.296444  | 6.325559  | -1.953856 |
| 43  | 1 | 0 | 3.462554  | 5.472807  | -0.645261 |
| 44  | 1 | 0 | 5.228777  | 5.409911  | -0.758783 |
| 45  | 1 | 0 | 0.923439  | -1.319019 | -3.671498 |
| 46  | 1 | 0 | 0.384513  | -3.004229 | -3.542231 |
| 47  | 1 | 0 | 1.450764  | -2.301984 | -2.314418 |
| 48  | 8 | 0 | 6.267753  | 3.321718  | -0.526502 |
| 49  | 1 | 0 | 6.871420  | 2.872927  | 0.080650  |
| 50  | 8 | 0 | 6.286098  | 1.165942  | 0.852934  |
| 51  | 1 | 0 | 6.170475  | 0.316504  | 1.367579  |
| 52  | 1 | 0 | -0.285909 | 2.856839  | -3.694418 |
| 53  | 1 | 0 | -1.379950 | 2.188228  | -2.470793 |
| 54  | 1 | 0 | -0.784165 | 1.154462  | -3.760543 |
| 55  | 8 | 0 | 1.648422  | -1.071321 | 0.063999  |
| 56  | 8 | 0 | -6.139785 | -1.230550 | 0.958604  |
| 57  | 1 | 0 | -2.987209 | -5.351523 | -1.077448 |
| 58  | 1 | 0 | -4.732155 | -5.490196 | -0.802893 |
| 59  | 8 | 0 | -6.168860 | -3.391597 | -0.406145 |
| 60  | 1 | 0 | -3.430647 | -4.008384 | -3.127964 |
| 61  | 1 | 0 | -5.473918 | -4.940451 | -3.888344 |
| 62  | 1 | 0 | -5.720564 | -3.203661 | -3.656191 |
| 63  | 1 | 0 | -6.371862 | -4.352812 | -2.479441 |
| 64  | 1 | 0 | 0.752846  | -1.424415 | -0.028609 |
| 65  | 1 | 0 | -0.728189 | 1.447886  | -0.084164 |
| 66  | 7 | 0 | 5.248502  | -0.996376 | 1.629277  |
| 67  | 6 | 0 | 4.558849  | -3.280112 | 2.042157  |
| 68  | 6 | 0 | 6.832663  | -2.457242 | 2.472781  |
| 69  | 6 | 0 | 4.780955  | -4.414170 | 3.039883  |
| 70  | 1 | 0 | 4.755523  | -3.621460 | 1.009831  |
| 71  | 1 | 0 | 3.515017  | -2.965092 | 2.095040  |
| 72  | 6 | 0 | 7.072309  | -3.552694 | 3.501299  |
| 73  | 1 | 0 | 7.220484  | -2.775319 | 1.490308  |
| 74  | 1 | 0 | 7.345856  | -1.535973 | 2.751987  |
| 75  | 6 | 0 | 6.255752  | -4.793200 | 3.146505  |
| 76  | 1 | 0 | 4.175610  | -5.271306 | 2.735906  |
| 77  | 1 | 0 | 4.419097  | -4.087778 | 4.019701  |
| 78  | 1 | 0 | 8.139971  | -3.781007 | 3.538451  |
| 79  | 1 | 0 | 6.774510  | -3.184882 | 4.488058  |
| 80  | 1 | 0 | 6.395304  | -5.577756 | 3.893449  |
| 81  | 1 | 0 | 6.602962  | -5.193414 | 2.186596  |
| 82  | 7 | 0 | 5.407138  | -2.139321 | 2.366665  |
| 83  | 7 | 0 | -5.243897 | 1.133575  | 1.489460  |
| 84  | 7 | 0 | -5.327838 | 2.429001  | 2.013080  |
| 85  | 6 | 0 | -6.508855 | 3.109744  | 1.464957  |
| 86  | 6 | 0 | -5.372788 | 2.361776  | 3.479468  |
| 87  | 6 | 0 | -6.569127 | 4.540655  | 1.987667  |
| 88  | 1 | 0 | -7.427958 | 2.565887  | 1.744365  |
| 89  | 1 | 0 | -6.423844 | 3.091737  | 0.377339  |
| 90  | 6 | 0 | -5.400415 | 3.769736  | 4.061995  |
| 91  | 1 | 0 | -6.264518 | 1.800491  | 3.809441  |
| 92  | 1 | 0 | -4.488132 | 1.815973  | 3.810651  |
| 93  | 6 | 0 | -6.591978 | 4.555926  | 3.515805  |
| 94  | 1 | 0 | -7.452766 | 5.034872  | 1.577652  |
| 95  | 1 | 0 | -5.688593 | 5.080747  | 1.626576  |
| 96  | 1 | 0 | -5.440511 | 3.705738  | 5.151787  |
| 97  | 1 | 0 | -4.468970 | 4.277243  | 3.793584  |
| 98  | 1 | 0 | -6.579173 | 5.581796  | 3.889837  |
| 99  | 1 | 0 | -7.522154 | 4.094943  | 3.868106  |
| 100 | 1 | 0 | -5.978922 | 0.437992  | 1.654436  |

### Structure 25ab (CHCl<sub>3</sub>)

Energy (Hartrees): = -2224.4301114  
 No imaginary frequencies

Standard orientation:

| Center Number | Atomic Number | Atomic Type | Coordinates (Angstroms) |           |           |
|---------------|---------------|-------------|-------------------------|-----------|-----------|
|               |               |             | X                       | Y         | Z         |
| 1             | 6             | 0           | -5.149459               | -2.571438 | -0.628640 |
| 2             | 6             | 0           | -4.082266               | -2.924396 | -1.413458 |
| 3             | 6             | 0           | -2.935261               | -2.052865 | -1.417502 |
| 4             | 6             | 0           | -2.933866               | -0.841657 | -0.652221 |
| 5             | 6             | 0           | -4.099951               | -0.481632 | 0.123452  |
| 6             | 6             | 0           | -5.163863               | -1.368713 | 0.128008  |
| 7             | 6             | 0           | 3.909759                | 5.405714  | -1.560759 |
| 8             | 6             | 0           | -0.600127               | 2.077791  | -2.969370 |
| 9             | 6             | 0           | -4.150267               | -4.219151 | -2.211259 |
| 10            | 6             | 0           | -1.729680               | -0.070390 | -0.673493 |
| 11            | 6             | 0           | -0.626348               | -0.425383 | -1.430085 |



|    |   |   |           |           |           |
|----|---|---|-----------|-----------|-----------|
| 12 | 6 | 0 | -0.652923 | -1.614195 | -2.201223 |
| 13 | 6 | 0 | -1.781970 | -2.390019 | -2.177706 |
| 14 | 6 | 0 | -5.278777 | -4.195882 | -3.251642 |
| 15 | 6 | 0 | -4.249802 | -5.447235 | -1.295502 |
| 16 | 6 | 0 | 0.546536  | -2.003211 | -3.023396 |
| 17 | 6 | 0 | -4.262490 | 0.796102  | 0.840630  |
| 18 | 6 | 0 | 4.252048  | -0.774805 | 0.726076  |
| 19 | 6 | 0 | 0.581042  | 0.454730  | -1.433426 |
| 20 | 6 | 0 | 0.607012  | 1.648319  | -2.177975 |
| 21 | 6 | 0 | 1.760972  | 2.406269  | -2.168596 |
| 22 | 6 | 0 | 2.911247  | 2.034021  | -1.443188 |
| 23 | 6 | 0 | 2.897419  | 0.835108  | -0.679514 |
| 24 | 6 | 0 | 1.700753  | 0.078910  | -0.694319 |
| 25 | 6 | 0 | 4.180463  | 4.120585  | -2.352686 |
| 26 | 6 | 0 | 5.507668  | 4.205629  | -3.118941 |
| 27 | 6 | 0 | 4.088754  | 2.903554  | -1.445525 |
| 28 | 6 | 0 | 5.078569  | 2.644456  | -0.556112 |
| 29 | 6 | 0 | 5.123738  | 1.434511  | 0.266594  |
| 30 | 6 | 0 | 4.064891  | 0.481624  | 0.129412  |
| 31 | 1 | 0 | 3.548509  | -1.578655 | 0.571635  |
| 32 | 1 | 0 | 1.751924  | 3.331630  | -2.726714 |
| 33 | 1 | 0 | -3.521939 | 1.563709  | 0.692698  |
| 34 | 1 | 0 | -1.773081 | -3.293449 | -2.768345 |
| 35 | 1 | 0 | 6.703307  | 2.991026  | 0.269278  |
| 36 | 1 | 0 | 3.931725  | 6.275804  | -2.222760 |
| 37 | 1 | 0 | -3.225856 | -4.332033 | -2.771620 |
| 38 | 8 | 0 | 1.648971  | -1.061989 | 0.048601  |
| 39 | 1 | 0 | -5.251814 | -5.113466 | -3.845989 |
| 40 | 1 | 0 | -5.162824 | -3.349256 | -3.933038 |
| 41 | 1 | 0 | -6.257688 | -4.124724 | -2.777419 |
| 42 | 1 | 0 | -4.213536 | -6.361304 | -1.894844 |
| 43 | 1 | 0 | -3.416151 | -5.472727 | -0.589036 |
| 44 | 1 | 0 | -5.181384 | -5.446659 | -0.728896 |
| 45 | 1 | 0 | -0.904138 | 1.298854  | -3.673917 |
| 46 | 1 | 0 | -0.387607 | 2.988412  | -3.530477 |
| 47 | 1 | 0 | -1.455226 | 2.271093  | -2.314609 |
| 48 | 8 | 0 | -6.257197 | -3.350894 | -0.551615 |
| 49 | 1 | 0 | -6.881876 | -2.913720 | 0.044938  |
| 50 | 8 | 0 | -6.301946 | -1.179918 | 0.818067  |
| 51 | 1 | 0 | -6.187045 | -0.329126 | 1.338485  |
| 52 | 1 | 0 | 0.341498  | -2.907035 | -3.597979 |
| 53 | 1 | 0 | 1.416120  | -2.191423 | -2.386274 |
| 54 | 1 | 0 | 0.822480  | -1.204206 | -3.716857 |
| 55 | 8 | 0 | -1.670053 | 1.058912  | 0.084604  |
| 56 | 8 | 0 | 6.137379  | 1.294209  | 0.993561  |
| 57 | 1 | 0 | 2.931029  | 5.369605  | -1.075060 |
| 58 | 1 | 0 | 4.670380  | 5.543015  | -0.788362 |
| 59 | 8 | 0 | 6.147632  | 3.452539  | -0.385539 |
| 60 | 1 | 0 | 3.411123  | 4.029954  | -3.118008 |
| 61 | 1 | 0 | 5.436182  | 4.990923  | -3.876590 |
| 62 | 1 | 0 | 5.723564  | 3.264182  | -3.630489 |
| 63 | 1 | 0 | 6.343500  | 4.438832  | -2.461433 |
| 64 | 1 | 0 | -0.775431 | 1.424836  | 0.029532  |
| 65 | 1 | 0 | 0.748636  | -1.416138 | 0.021505  |
| 66 | 7 | 0 | -5.279224 | 0.972059  | 1.609385  |
| 67 | 6 | 0 | -4.677441 | 3.286237  | 1.987083  |
| 68 | 6 | 0 | -6.913732 | 2.374083  | 2.458162  |
| 69 | 6 | 0 | -4.935141 | 4.420701  | 2.975107  |
| 70 | 1 | 0 | -4.906254 | 3.603042  | 0.954784  |
| 71 | 1 | 0 | -3.620329 | 3.018438  | 2.030042  |
| 72 | 6 | 0 | -7.184536 | 3.472224  | 3.475226  |
| 73 | 1 | 0 | -7.321542 | 2.664298  | 1.476193  |
| 74 | 1 | 0 | -7.386753 | 1.436976  | 2.756490  |
| 75 | 6 | 0 | -6.422544 | 4.740149  | 3.098178  |
| 76 | 1 | 0 | -4.369386 | 5.297324  | 2.650862  |
| 77 | 1 | 0 | -4.545879 | 4.122830  | 3.953986  |
| 78 | 1 | 0 | -8.260516 | 3.656731  | 3.517716  |
| 79 | 1 | 0 | -6.864904 | 3.129360  | 4.464714  |
| 80 | 1 | 0 | -6.582455 | 5.524050  | 3.842161  |
| 81 | 1 | 0 | -6.797539 | 5.117576  | 2.139469  |
| 82 | 7 | 0 | -5.474452 | 2.112550  | 2.336546  |
| 83 | 7 | 0 | 5.275089  | -1.110518 | 1.484594  |
| 84 | 7 | 0 | 5.379220  | -2.416954 | 1.981657  |
| 85 | 6 | 0 | 6.576386  | -3.060344 | 1.415129  |
| 86 | 6 | 0 | 5.438705  | -2.364769 | 3.451204  |
| 87 | 6 | 0 | 6.677911  | -4.494061 | 1.921797  |
| 88 | 1 | 0 | 7.479796  | -2.493649 | 1.696205  |
| 89 | 1 | 0 | 6.482299  | -3.034345 | 0.328189  |
| 90 | 6 | 0 | 5.510799  | -3.777456 | 4.017200  |
| 91 | 1 | 0 | 6.319294  | -1.784117 | 3.772927  |
| 92 | 1 | 0 | 4.543096  | -1.847565 | 3.798990  |
| 93 | 6 | 0 | 6.715784  | -4.526616 | 3.449154  |
| 94 | 1 | 0 | 7.571943  | -4.956733 | 1.497363  |
| 95 | 1 | 0 | 5.810148  | -5.056112 | 1.561893  |
| 96 | 1 | 0 | 5.563986  | -3.719665 | 5.107013  |
| 97 | 1 | 0 | 4.589260  | -4.308715 | 3.758218  |
| 98 | 1 | 0 | 6.730332  | -5.557426 | 3.809964  |
| 99 | 1 | 0 | 7.637574  | -4.046532 | 3.797893  |

100            1            0            6.000671    -0.415552    1.683638

-----  
**Structure 25ab (DMSO)**

Energy (Hartrees): = -2224.419749  
No imaginary frequencies

Standard orientation:

| Center<br>Number | Atomic<br>Number | Atomic<br>Type | Coordinates (Angstroms) |           |           |
|------------------|------------------|----------------|-------------------------|-----------|-----------|
|                  |                  |                | X                       | Y         | Z         |
| 1                | 6                | 0              | -5.148521               | -2.543926 | -0.612047 |
| 2                | 6                | 0              | -4.117722               | -2.870205 | -1.455228 |
| 3                | 6                | 0              | -2.958938               | -2.013683 | -1.458871 |
| 4                | 6                | 0              | -2.929284               | -0.821139 | -0.665508 |
| 5                | 6                | 0              | -4.075771               | -0.465495 | 0.140435  |
| 6                | 6                | 0              | -5.137452               | -1.355098 | 0.167636  |
| 7                | 6                | 0              | 3.949603                | 5.365832  | -1.621100 |
| 8                | 6                | 0              | -0.561818               | 2.062884  | -3.037828 |
| 9                | 6                | 0              | -4.227070               | -4.123911 | -2.310824 |
| 10               | 6                | 0              | -1.715776               | -0.065186 | -0.686971 |
| 11               | 6                | 0              | -0.630267               | -0.417506 | -1.470036 |
| 12               | 6                | 0              | -0.682495               | -1.589557 | -2.264764 |
| 13               | 6                | 0              | -1.820555               | -2.352960 | -2.240618 |
| 14               | 6                | 0              | -5.443671               | -4.087797 | -3.246328 |
| 15               | 6                | 0              | -4.215799               | -5.392728 | -1.444853 |
| 16               | 6                | 0              | 0.500805                | -1.976736 | -3.109600 |
| 17               | 6                | 0              | -4.223032               | 0.810480  | 0.865029  |
| 18               | 6                | 0              | 4.221143                | -0.788470 | 0.751499  |
| 19               | 6                | 0              | 0.587856                | 0.447865  | -1.471086 |
| 20               | 6                | 0              | 0.633469                | 1.631012  | -2.231110 |
| 21               | 6                | 0              | 1.793499                | 2.379429  | -2.216309 |
| 22               | 6                | 0              | 2.930471                | 2.005010  | -1.470497 |
| 23               | 6                | 0              | 2.896699                | 0.816407  | -0.690162 |
| 24               | 6                | 0              | 1.692792                | 0.070664  | -0.710823 |
| 25               | 6                | 0              | 4.226308                | 4.069335  | -2.391127 |
| 26               | 6                | 0              | 5.565401                | 4.138505  | -3.136809 |
| 27               | 6                | 0              | 4.114741                | 2.865650  | -1.468848 |
| 28               | 6                | 0              | 5.090404                | 2.609555  | -0.562857 |
| 29               | 6                | 0              | 5.114978                | 1.409548  | 0.276194  |
| 30               | 6                | 0              | 4.050434                | 0.464597  | 0.139045  |
| 31               | 1                | 0              | 3.514338                | -1.588862 | 0.594389  |
| 32               | 1                | 0              | 1.799010                | 3.298514  | -2.785055 |
| 33               | 1                | 0              | -3.491554               | 1.583873  | 0.699137  |
| 34               | 1                | 0              | -1.825455               | -3.251882 | -2.838907 |
| 35               | 1                | 0              | 6.698716                | 2.937831  | 0.285328  |
| 36               | 1                | 0              | 3.992795                | 6.226566  | -2.294113 |
| 37               | 1                | 0              | -3.357640               | -4.178021 | -2.960999 |
| 38               | 8                | 0              | 1.616025                | -1.055943 | 0.050602  |
| 39               | 1                | 0              | -5.412395               | -4.948982 | -3.919521 |
| 40               | 1                | 0              | -5.437514               | -3.182879 | -3.859751 |
| 41               | 1                | 0              | -6.380835               | -4.121731 | -2.691540 |
| 42               | 1                | 0              | -4.229163               | -6.280268 | -2.087310 |
| 43               | 1                | 0              | -3.314719               | -5.435102 | -0.830834 |
| 44               | 1                | 0              | -5.086883               | -5.429981 | -0.792384 |
| 45               | 1                | 0              | -0.872175               | 1.275542  | -3.730497 |
| 46               | 1                | 0              | -0.332613               | 2.960383  | -3.613194 |
| 47               | 1                | 0              | -1.417995               | 2.281422  | -2.392183 |
| 48               | 8                | 0              | -6.250733               | -3.326986 | -0.502579 |
| 49               | 1                | 0              | -6.848309               | -2.893455 | 0.123317  |
| 50               | 8                | 0              | -6.252856               | -1.176687 | 0.894832  |
| 51               | 1                | 0              | -6.125212               | -0.322310 | 1.410206  |
| 52               | 1                | 0              | 0.274291                | -2.862317 | -3.704128 |
| 53               | 1                | 0              | 1.375037                | -2.196107 | -2.488907 |
| 54               | 1                | 0              | 0.780692                | -1.164345 | -3.786040 |
| 55               | 8                | 0              | -1.627756               | 1.039290  | 0.101857  |
| 56               | 8                | 0              | 6.118059                | 1.273763  | 1.018200  |
| 57               | 1                | 0              | 2.959295                | 5.343955  | -1.158382 |
| 58               | 1                | 0              | 4.694493                | 5.507634  | -0.833912 |
| 59               | 8                | 0              | 6.165668                | 3.406848  | -0.383456 |
| 60               | 1                | 0              | 3.468514                | 3.973807  | -3.167106 |
| 61               | 1                | 0              | 5.510216                | 4.918798  | -3.900797 |
| 62               | 1                | 0              | 5.782236                | 3.192139  | -3.639405 |
| 63               | 1                | 0              | 6.393293                | 4.370038  | -2.468493 |
| 64               | 1                | 0              | -0.741169               | 1.417387  | 0.006082  |
| 65               | 1                | 0              | 0.719934                | -1.416564 | -0.016830 |
| 66               | 7                | 0              | -5.222473               | 0.976948  | 1.658756  |
| 67               | 6                | 0              | -4.629090               | 3.293203  | 2.028618  |
| 68               | 6                | 0              | -6.857030               | 2.367235  | 2.523583  |
| 69               | 6                | 0              | -4.888409               | 4.430548  | 3.012352  |
| 70               | 1                | 0              | -4.869697               | 3.602371  | 0.997310  |
| 71               | 1                | 0              | -3.569748               | 3.033227  | 2.065042  |
| 72               | 6                | 0              | -7.126839               | 3.470702  | 3.534519  |
| 73               | 1                | 0              | -7.272718               | 2.649286  | 1.543077  |
| 74               | 1                | 0              | -7.321987               | 1.429258  | 2.832317  |

|     |   |   |           |           |          |
|-----|---|---|-----------|-----------|----------|
| 75  | 6 | 0 | -6.376763 | 4.740605  | 3.142623 |
| 76  | 1 | 0 | -4.330615 | 5.308271  | 2.677790 |
| 77  | 1 | 0 | -4.490576 | 4.142792  | 3.991054 |
| 78  | 1 | 0 | -8.203925 | 3.647021  | 3.582347 |
| 79  | 1 | 0 | -6.799036 | 3.137928  | 4.525007 |
| 80  | 1 | 0 | -6.537186 | 5.529073  | 3.881698 |
| 81  | 1 | 0 | -6.759922 | 5.107375  | 2.183093 |
| 82  | 7 | 0 | -5.415393 | 2.114508  | 2.389766 |
| 83  | 7 | 0 | 5.228427  | -1.125766 | 1.526446 |
| 84  | 7 | 0 | 5.319269  | -2.432025 | 2.027900 |
| 85  | 6 | 0 | 6.508988  | -3.086889 | 1.454704 |
| 86  | 6 | 0 | 5.396349  | -2.369400 | 3.497440 |
| 87  | 6 | 0 | 6.606508  | -4.517081 | 1.970750 |
| 88  | 1 | 0 | 7.415537  | -2.522053 | 1.726354 |
| 89  | 1 | 0 | 6.404401  | -3.068172 | 0.368465 |
| 90  | 6 | 0 | 5.464362  | -3.778562 | 4.071765 |
| 91  | 1 | 0 | 6.286003  | -1.794274 | 3.801870 |
| 92  | 1 | 0 | 4.508591  | -1.843279 | 3.852458 |
| 93  | 6 | 0 | 6.658748  | -4.539069 | 3.497591 |
| 94  | 1 | 0 | 7.494489  | -4.986884 | 1.541563 |
| 95  | 1 | 0 | 5.733056  | -5.078257 | 1.622721 |
| 96  | 1 | 0 | 5.528948  | -3.711987 | 5.160416 |
| 97  | 1 | 0 | 4.536859  | -4.306553 | 3.827056 |
| 98  | 1 | 0 | 6.670599  | -5.567669 | 3.865058 |
| 99  | 1 | 0 | 7.586041  | -4.060653 | 3.833349 |
| 100 | 1 | 0 | 5.962063  | -0.441850 | 1.732946 |

-----

### Structure 25cd (vacuum)

Energy (Hartrees): = -2224.3812215  
 No imaginary frequencies

Standard orientation:

| Center<br>Number | Atomic<br>Number | Atomic<br>Type | Coordinates (Angstroms) |           |           |
|------------------|------------------|----------------|-------------------------|-----------|-----------|
|                  |                  |                | X                       | Y         | Z         |
| 1                | 6                | 0              | 5.149458                | 2.299965  | -0.749329 |
| 2                | 6                | 0              | 4.078210                | 2.733673  | -1.485154 |
| 3                | 6                | 0              | 2.888633                | 1.922559  | -1.480299 |
| 4                | 6                | 0              | 2.857730                | 0.677377  | -0.774356 |
| 5                | 6                | 0              | 4.034664                | 0.221882  | -0.071375 |
| 6                | 6                | 0              | 5.132030                | 1.064249  | -0.047948 |
| 7                | 6                | 0              | -4.374253               | -5.167121 | -1.620522 |
| 8                | 6                | 0              | 0.279891                | -2.008576 | -3.089812 |
| 9                | 6                | 0              | 4.193797                | 4.043698  | -2.249264 |
| 10               | 6                | 0              | 1.617433                | -0.029588 | -0.776737 |
| 11               | 6                | 0              | 0.500118                | 0.419273  | -1.459149 |
| 12               | 6                | 0              | 0.554880                | 1.638662  | -2.177430 |
| 13               | 6                | 0              | 1.723120                | 2.353554  | -2.169272 |
| 14               | 6                | 0              | 5.302382                | 3.989082  | -3.310786 |
| 15               | 6                | 0              | 4.369572                | 5.240691  | -1.304160 |
| 16               | 6                | 0              | -0.658202               | 2.117137  | -2.931093 |
| 17               | 6                | 0              | 4.162352                | -1.105018 | 0.550857  |
| 18               | 6                | 0              | -4.224321               | 0.878768  | 0.992988  |
| 19               | 6                | 0              | -0.748409               | -0.399391 | -1.439100 |
| 20               | 6                | 0              | -0.867401               | -1.559909 | -2.222146 |
| 21               | 6                | 0              | -2.055842               | -2.261476 | -2.180916 |
| 22               | 6                | 0              | -3.150276               | -1.861875 | -1.390527 |
| 23               | 6                | 0              | -3.037783               | -0.700456 | -0.578728 |
| 24               | 6                | 0              | -1.812114               | -0.000526 | -0.631269 |
| 25               | 6                | 0              | -4.574877               | -3.827638 | -2.341265 |
| 26               | 6                | 0              | -5.928824               | -3.777993 | -3.064312 |
| 27               | 6                | 0              | -4.373735               | -2.667260 | -1.380475 |
| 28               | 6                | 0              | -5.312422               | -2.400871 | -0.441342 |
| 29               | 6                | 0              | -5.254490               | -1.233007 | 0.440927  |
| 30               | 6                | 0              | -4.144702               | -0.331769 | 0.305794  |
| 31               | 1                | 0              | -3.458361               | 1.625681  | 0.849571  |
| 32               | 1                | 0              | -2.120809               | -3.164759 | -2.770055 |
| 33               | 1                | 0              | 3.379146                | -1.822027 | 0.371097  |
| 34               | 1                | 0              | 1.736778                | 3.285291  | -2.713374 |
| 35               | 1                | 0              | -6.911113               | -2.689996 | 0.440244  |
| 36               | 1                | 0              | -4.482867               | -5.997998 | -2.322463 |
| 37               | 1                | 0              | 3.267094                | 4.212906  | -2.792290 |
| 38               | 8                | 0              | -1.657507               | 1.117945  | 0.140898  |
| 39               | 1                | 0              | 5.301241                | 4.914243  | -3.892998 |
| 40               | 1                | 0              | 5.137769                | 3.155134  | -3.996649 |
| 41               | 1                | 0              | 6.283410                | 3.872088  | -2.852139 |
| 42               | 1                | 0              | 4.374284                | 6.170237  | -1.879287 |
| 43               | 1                | 0              | 3.548738                | 5.287669  | -0.584862 |
| 44               | 1                | 0              | 5.308025                | 5.170707  | -0.755004 |
| 45               | 1                | 0              | 0.593232                | -1.207352 | -3.764012 |
| 46               | 1                | 0              | -0.003278               | -2.875846 | -3.686376 |
| 47               | 1                | 0              | 1.152168                | -2.274836 | -2.485812 |
| 48               | 8                | 0              | 6.295196                | 3.021843  | -0.670477 |
| 49               | 1                | 0              | 6.909442                | 2.514984  | -0.122489 |

|     |   |   |           |           |           |
|-----|---|---|-----------|-----------|-----------|
| 50  | 8 | 0 | 6.281972  | 0.793903  | 0.593412  |
| 51  | 1 | 0 | 6.169224  | -0.095934 | 1.032916  |
| 52  | 1 | 0 | -0.433024 | 3.028339  | -3.485240 |
| 53  | 1 | 0 | -1.489526 | 2.322327  | -2.250472 |
| 54  | 1 | 0 | -1.004635 | 1.355179  | -3.634245 |
| 55  | 8 | 0 | 1.525468  | -1.195801 | -0.074137 |
| 56  | 8 | 0 | -6.221154 | -1.072644 | 1.216991  |
| 57  | 1 | 0 | -3.380787 | -5.224152 | -1.169020 |
| 58  | 1 | 0 | -5.119319 | -5.282760 | -0.830886 |
| 59  | 8 | 0 | -6.417886 | -3.152335 | -0.261414 |
| 60  | 1 | 0 | -3.824725 | -3.751304 | -3.127168 |
| 61  | 1 | 0 | -5.946438 | -4.538663 | -3.849043 |
| 62  | 1 | 0 | -6.081145 | -2.802961 | -3.532589 |
| 63  | 1 | 0 | -6.755281 | -3.965663 | -2.381998 |
| 64  | 1 | 0 | 0.611781  | -1.507160 | -0.131414 |
| 65  | 1 | 0 | -0.744066 | 1.420925  | 0.047936  |
| 66  | 7 | 0 | 5.200412  | -1.396352 | 1.252219  |
| 67  | 6 | 0 | 6.062977  | -2.547208 | 3.066356  |
| 68  | 6 | 0 | 4.296702  | -3.591315 | 1.720924  |
| 69  | 6 | 0 | 6.548431  | -3.906820 | 3.547093  |
| 70  | 1 | 0 | 5.356745  | -2.123254 | 3.799550  |
| 71  | 1 | 0 | 6.890660  | -1.845463 | 2.956757  |
| 72  | 6 | 0 | 4.734033  | -4.968590 | 2.212696  |
| 73  | 1 | 0 | 3.454403  | -3.207840 | 2.324383  |
| 74  | 1 | 0 | 3.951152  | -3.681636 | 0.689494  |
| 75  | 6 | 0 | 5.384001  | -4.894022 | 3.591334  |
| 76  | 1 | 0 | 7.007027  | -3.794031 | 4.532266  |
| 77  | 1 | 0 | 7.317589  | -4.274115 | 2.860628  |
| 78  | 1 | 0 | 3.863098  | -5.628054 | 2.222523  |
| 79  | 1 | 0 | 5.450964  | -5.380803 | 1.495963  |
| 80  | 1 | 0 | 5.722604  | -5.882324 | 3.909555  |
| 81  | 1 | 0 | 4.645831  | -4.551266 | 4.326081  |
| 82  | 7 | 0 | 5.413072  | -2.653860 | 1.757064  |
| 83  | 7 | 0 | -5.192803 | 1.231245  | 1.827180  |
| 84  | 7 | 0 | -5.230870 | 2.483262  | 2.461185  |
| 85  | 6 | 0 | -4.094270 | 2.666316  | 3.370329  |
| 86  | 6 | 0 | -5.363013 | 3.581343  | 1.497561  |
| 87  | 6 | 0 | -4.287534 | 3.949555  | 4.170695  |
| 88  | 1 | 0 | -3.142198 | 2.715635  | 2.813774  |
| 89  | 1 | 0 | -4.055341 | 1.795422  | 4.026474  |
| 90  | 6 | 0 | -5.592684 | 4.887967  | 2.248312  |
| 91  | 1 | 0 | -4.459721 | 3.671426  | 0.869656  |
| 92  | 1 | 0 | -6.206136 | 3.347287  | 0.845707  |
| 93  | 6 | 0 | -4.454493 | 5.147342  | 3.235314  |
| 94  | 1 | 0 | -3.433644 | 4.090627  | 4.837377  |
| 95  | 1 | 0 | -5.181477 | 3.840906  | 4.792199  |
| 96  | 1 | 0 | -5.680076 | 5.705882  | 1.529324  |
| 97  | 1 | 0 | -6.541223 | 4.816641  | 2.788940  |
| 98  | 1 | 0 | -4.644945 | 6.057517  | 3.808138  |
| 99  | 1 | 0 | -3.522396 | 5.305451  | 2.679904  |
| 100 | 1 | 0 | -5.951867 | 0.578359  | 2.007243  |

### Structure 25cd (CHCl<sub>3</sub>)

Energy (Hartrees): = -2224.4256613

No imaginary frequencies

Standard orientation:

| Center Number | Atomic Number | Atomic Type | Coordinates (Angstroms) |           |           |
|---------------|---------------|-------------|-------------------------|-----------|-----------|
|               |               |             | X                       | Y         | Z         |
| 1             | 6             | 0           | 5.117529                | 2.385682  | -0.715164 |
| 2             | 6             | 0           | 4.038263                | 2.800296  | -1.452128 |
| 3             | 6             | 0           | 2.860758                | 1.969946  | -1.443496 |
| 4             | 6             | 0           | 2.854903                | 0.721650  | -0.743193 |
| 5             | 6             | 0           | 4.045846                | 0.278790  | -0.054628 |
| 6             | 6             | 0           | 5.127310                | 1.142678  | -0.025790 |
| 7             | 6             | 0           | -4.265226               | -5.255991 | -1.566582 |
| 8             | 6             | 0           | 0.329960                | -2.021451 | -3.014777 |
| 9             | 6             | 0           | 4.123444                | 4.115128  | -2.213443 |
| 10            | 6             | 0           | 1.621913                | -0.000727 | -0.724696 |
| 11            | 6             | 0           | 0.494218                | 0.426499  | -1.403843 |
| 12            | 6             | 0           | 0.526453                | 1.647254  | -2.123414 |
| 13            | 6             | 0           | 1.682856                | 2.383207  | -2.123666 |
| 14            | 6             | 0           | 5.242184                | 4.104143  | -3.264981 |
| 15            | 6             | 0           | 4.250356                | 5.314412  | -1.264505 |
| 16            | 6             | 0           | -0.695580               | 2.113544  | -2.868795 |
| 17            | 6             | 0           | 4.210300                | -1.062267 | 0.531266  |
| 18            | 6             | 0           | -4.284523               | 0.840240  | 0.968170  |
| 19            | 6             | 0           | -0.740973               | -0.413922 | -1.383611 |
| 20            | 6             | 0           | -0.832122               | -1.581027 | -2.163954 |
| 21            | 6             | 0           | -2.008418               | -2.303742 | -2.133633 |
| 22            | 6             | 0           | -3.118502               | -1.920245 | -1.354843 |
| 23            | 6             | 0           | -3.036663               | -0.751440 | -0.549557 |
| 24            | 6             | 0           | -1.818183               | -0.032450 | -0.585673 |

|     |   |   |           |           |           |
|-----|---|---|-----------|-----------|-----------|
| 25  | 6 | 0 | -4.492230 | -3.926274 | -2.296340 |
| 26  | 6 | 0 | -5.839937 | -3.916268 | -3.031499 |
| 27  | 6 | 0 | -4.323826 | -2.752236 | -1.344481 |
| 28  | 6 | 0 | -5.273598 | -2.495128 | -0.412359 |
| 29  | 6 | 0 | -5.248033 | -1.317480 | 0.457243  |
| 30  | 6 | 0 | -4.162824 | -0.392760 | 0.315031  |
| 31  | 1 | 0 | -3.546962 | 1.610835  | 0.801930  |
| 32  | 1 | 0 | -2.049174 | -3.210317 | -2.720372 |
| 33  | 1 | 0 | 3.456026  | -1.802827 | 0.323025  |
| 34  | 1 | 0 | 1.672664  | 3.318226  | -2.663257 |
| 35  | 1 | 0 | -6.879992 | -2.821126 | 0.458021  |
| 36  | 1 | 0 | -4.353649 | -6.093143 | -2.264498 |
| 37  | 1 | 0 | 3.198187  | 4.255443  | -2.766217 |
| 38  | 8 | 0 | -1.698568 | 1.079897  | 0.195518  |
| 39  | 1 | 0 | 5.212390  | 5.032454  | -3.842201 |
| 40  | 1 | 0 | 5.113991  | 3.270925  | -3.960533 |
| 41  | 1 | 0 | 6.226109  | 4.019540  | -2.804137 |
| 42  | 1 | 0 | 4.231758  | 6.245967  | -1.837016 |
| 43  | 1 | 0 | 3.420167  | 5.336603  | -0.553791 |
| 44  | 1 | 0 | 5.184165  | 5.276851  | -0.702389 |
| 45  | 1 | 0 | 0.636675  | -1.227544 | -3.701088 |
| 46  | 1 | 0 | 0.065562  | -2.902135 | -3.601161 |
| 47  | 1 | 0 | 1.200252  | -2.269005 | -2.399459 |
| 48  | 8 | 0 | 6.244977  | 3.135473  | -0.632588 |
| 49  | 1 | 0 | 6.885174  | 2.645290  | -0.096876 |
| 50  | 8 | 0 | 6.283136  | 0.884367  | 0.609594  |
| 51  | 1 | 0 | 6.185543  | -0.017310 | 1.036929  |
| 52  | 1 | 0 | -0.485712 | 3.035086  | -3.412688 |
| 53  | 1 | 0 | -1.528877 | 2.301501  | -2.185128 |
| 54  | 1 | 0 | -1.031504 | 1.357001  | -3.583239 |
| 55  | 8 | 0 | 1.560874  | -1.152569 | -0.001622 |
| 56  | 8 | 0 | -6.226510 | -1.170689 | 1.226395  |
| 57  | 1 | 0 | -3.271234 | -5.292812 | -1.113086 |
| 58  | 1 | 0 | -5.008074 | -5.388752 | -0.776648 |
| 59  | 8 | 0 | -6.363746 | -3.272501 | -0.235085 |
| 60  | 1 | 0 | -3.737535 | -3.840678 | -3.076446 |
| 61  | 1 | 0 | -5.827379 | -4.679511 | -3.814377 |
| 62  | 1 | 0 | -6.016807 | -2.948444 | -3.507753 |
| 63  | 1 | 0 | -6.671029 | -4.127220 | -2.360450 |
| 64  | 1 | 0 | 0.651279  | -1.483541 | -0.017060 |
| 65  | 1 | 0 | -0.787603 | 1.403091  | 0.145113  |
| 66  | 7 | 0 | 5.257033  | -1.336328 | 1.227258  |
| 67  | 6 | 0 | 6.181076  | -2.496915 | 3.005152  |
| 68  | 6 | 0 | 4.436142  | -3.572268 | 1.646325  |
| 69  | 6 | 0 | 6.711785  | -3.850425 | 3.452618  |
| 70  | 1 | 0 | 5.465726  | -2.112258 | 3.749746  |
| 71  | 1 | 0 | 6.986979  | -1.768229 | 2.905447  |
| 72  | 6 | 0 | 4.923186  | -4.942997 | 2.106859  |
| 73  | 1 | 0 | 3.589453  | -3.228391 | 2.265556  |
| 74  | 1 | 0 | 4.085848  | -3.653193 | 0.615865  |
| 75  | 6 | 0 | 5.581031  | -4.875947 | 3.481773  |
| 76  | 1 | 0 | 7.170691  | -3.740787 | 4.438162  |
| 77  | 1 | 0 | 7.490592  | -4.178794 | 2.756598  |
| 78  | 1 | 0 | 4.072057  | -5.628018 | 2.109689  |
| 79  | 1 | 0 | 5.645988  | -5.320460 | 1.376379  |
| 80  | 1 | 0 | 5.955612  | -5.859484 | 3.774556  |
| 81  | 1 | 0 | 4.837548  | -4.573919 | 4.228857  |
| 82  | 7 | 0 | 5.521660  | -2.595516 | 1.696312  |
| 83  | 7 | 0 | -5.264966 | 1.184221  | 1.783397  |
| 84  | 7 | 0 | -5.356109 | 2.453032  | 2.382908  |
| 85  | 6 | 0 | -4.245331 | 2.684888  | 3.317274  |
| 86  | 6 | 0 | -5.480200 | 3.521448  | 1.381533  |
| 87  | 6 | 0 | -4.486729 | 3.985932  | 4.073181  |
| 88  | 1 | 0 | -3.283339 | 2.738510  | 2.780733  |
| 89  | 1 | 0 | -4.206687 | 1.834666  | 4.000394  |
| 90  | 6 | 0 | -5.755575 | 4.843234  | 2.088476  |
| 91  | 1 | 0 | -4.560616 | 3.609091  | 0.779978  |
| 92  | 1 | 0 | -6.301500 | 3.253575  | 0.714485  |
| 93  | 6 | 0 | -4.652242 | 5.153509  | 3.100220  |
| 94  | 1 | 0 | -3.652329 | 4.161783  | 4.756222  |
| 95  | 1 | 0 | -5.393572 | 3.877919  | 4.676689  |
| 96  | 1 | 0 | -5.836173 | 5.636776  | 1.341749  |
| 97  | 1 | 0 | -6.719032 | 4.771044  | 2.602938  |
| 98  | 1 | 0 | -4.879238 | 6.073809  | 3.643439  |
| 99  | 1 | 0 | -3.707888 | 5.315775  | 2.567148  |
| 100 | 1 | 0 | -6.001908 | 0.513330  | 1.986978  |

### Structure 26cd (DMSO)

Energy (Hartrees): = -2224.4153511  
 No imaginary frequencies

Standard orientation:

Center Atomic Atomic Coordinates (Angstroms)

| Number | Number | Type | X         | Y         | Z         |
|--------|--------|------|-----------|-----------|-----------|
| 1      | 6      | 0    | 5.118095  | 2.369045  | -0.716479 |
| 2      | 6      | 0    | 4.045247  | 2.784752  | -1.462859 |
| 3      | 6      | 0    | 2.866189  | 1.955736  | -1.462689 |
| 4      | 6      | 0    | 2.850479  | 0.711953  | -0.754176 |
| 5      | 6      | 0    | 4.035619  | 0.266182  | -0.057871 |
| 6      | 6      | 0    | 5.119759  | 1.127069  | -0.024114 |
| 7      | 6      | 0    | -4.265409 | -5.236058 | -1.578195 |
| 8      | 6      | 0    | 0.296086  | -1.997406 | -3.078868 |
| 9      | 6      | 0    | 4.133719  | 4.101080  | -2.220566 |
| 10     | 6      | 0    | 1.613954  | -0.004637 | -0.735708 |
| 11     | 6      | 0    | 0.494820  | 0.421395  | -1.429345 |
| 12     | 6      | 0    | 0.537976  | 1.634271  | -2.161332 |
| 13     | 6      | 0    | 1.696261  | 2.367692  | -2.158012 |
| 14     | 6      | 0    | 5.259594  | 4.095288  | -3.263624 |
| 15     | 6      | 0    | 4.251352  | 5.296830  | -1.266700 |
| 16     | 6      | 0    | -0.677902 | 2.098284  | -2.916829 |
| 17     | 6      | 0    | 4.193783  | -1.075347 | 0.529758  |
| 18     | 6      | 0    | -4.260433 | 0.844796  | 0.984105  |
| 19     | 6      | 0    | -0.745258 | -0.411797 | -1.409062 |
| 20     | 6      | 0    | -0.851712 | -1.566537 | -2.205331 |
| 21     | 6      | 0    | -2.029402 | -2.286659 | -2.167457 |
| 22     | 6      | 0    | -3.127235 | -1.907725 | -1.368448 |
| 23     | 6      | 0    | -3.032527 | -0.746523 | -0.552856 |
| 24     | 6      | 0    | -1.810164 | -0.033574 | -0.593949 |
| 25     | 6      | 0    | -4.510897 | -3.908137 | -2.304163 |
| 26     | 6      | 0    | -5.867920 | -3.906664 | -3.020504 |
| 27     | 6      | 0    | -4.334760 | -2.736396 | -1.351298 |
| 28     | 6      | 0    | -5.273632 | -2.481223 | -0.407337 |
| 29     | 6      | 0    | -5.232055 | -1.312279 | 0.474424  |
| 30     | 6      | 0    | -4.146920 | -0.390283 | 0.327981  |
| 31     | 1      | 0    | -3.525410 | 1.616872  | 0.811782  |
| 32     | 1      | 0    | -2.080143 | -3.185711 | -2.765046 |
| 33     | 1      | 0    | 3.443820  | -1.819014 | 0.315495  |
| 34     | 1      | 0    | 1.693137  | 3.297238  | -2.707115 |
| 35     | 1      | 0    | -6.861845 | -2.793010 | 0.485544  |
| 36     | 1      | 0    | -4.361249 | -6.073429 | -2.274835 |
| 37     | 1      | 0    | 3.212228  | 4.243383  | -2.778513 |
| 38     | 8      | 0    | -1.673006 | 1.064350  | 0.201344  |
| 39     | 1      | 0    | 5.234654  | 5.027371  | -3.834842 |
| 40     | 1      | 0    | 5.134671  | 3.267590  | -3.966692 |
| 41     | 1      | 0    | 6.240687  | 4.005640  | -2.797334 |
| 42     | 1      | 0    | 4.232831  | 6.229492  | -1.837237 |
| 43     | 1      | 0    | 3.415706  | 5.315043  | -0.562140 |
| 44     | 1      | 0    | 5.181548  | 5.261635  | -0.698195 |
| 45     | 1      | 0    | 0.601404  | -1.189606 | -3.749703 |
| 46     | 1      | 0    | 0.016619  | -2.861586 | -3.682496 |
| 47     | 1      | 0    | 1.171096  | -2.269959 | -2.480844 |
| 48     | 8      | 0    | 6.248345  | 3.113579  | -0.623822 |
| 49     | 1      | 0    | 6.872850  | 2.620487  | -0.072995 |
| 50     | 8      | 0    | 6.270214  | 0.865344  | 0.618087  |
| 51     | 1      | 0    | 6.159757  | -0.035347 | 1.049978  |
| 52     | 1      | 0    | -0.461409 | 3.013307  | -3.468840 |
| 53     | 1      | 0    | -1.512675 | 2.298270  | -2.237951 |
| 54     | 1      | 0    | -1.013764 | 1.335059  | -3.624592 |
| 55     | 8      | 0    | 1.540624  | -1.142849 | 0.005207  |
| 56     | 8      | 0    | -6.200550 | -1.175397 | 1.259065  |
| 57     | 1      | 0    | -3.262672 | -5.267447 | -1.143686 |
| 58     | 1      | 0    | -4.993863 | -5.372586 | -0.775106 |
| 59     | 8      | 0    | -6.366872 | -3.251369 | -0.218837 |
| 60     | 1      | 0    | -3.767455 | -3.819279 | -3.094283 |
| 61     | 1      | 0    | -5.859874 | -4.670117 | -3.803111 |
| 62     | 1      | 0    | -6.057489 | -2.940587 | -3.495965 |
| 63     | 1      | 0    | -6.689273 | -4.122336 | -2.338962 |
| 64     | 1      | 0    | 0.637499  | -1.488510 | -0.046713 |
| 65     | 1      | 0    | -0.768369 | 1.399018  | 0.116754  |
| 66     | 7      | 0    | 5.236312  | -1.343892 | 1.234688  |
| 67     | 6      | 0    | 6.154779  | -2.487717 | 3.025182  |
| 68     | 6      | 0    | 4.426014  | -3.582380 | 1.656098  |
| 69     | 6      | 0    | 6.688213  | -3.835539 | 3.484826  |
| 70     | 1      | 0    | 5.429835  | -2.104356 | 3.760493  |
| 71     | 1      | 0    | 6.957576  | -1.755038 | 2.927519  |
| 72     | 6      | 0    | 4.919049  | -4.946528 | 2.128576  |
| 73     | 1      | 0    | 3.574336  | -3.240365 | 2.268769  |
| 74     | 1      | 0    | 4.083744  | -3.670135 | 0.623461  |
| 75     | 6      | 0    | 5.562845  | -4.866612 | 3.509247  |
| 76     | 1      | 0    | 7.136570  | -3.716390 | 4.474044  |
| 77     | 1      | 0    | 7.476197  | -4.164474 | 2.799180  |
| 78     | 1      | 0    | 4.071937  | -5.636355 | 2.127537  |
| 79     | 1      | 0    | 5.650952  | -5.324498 | 1.407187  |
| 80     | 1      | 0    | 5.940389  | -5.845864 | 3.812535  |
| 81     | 1      | 0    | 4.810026  | -4.562659 | 4.246118  |
| 82     | 7      | 0    | 5.505700  | -2.597860 | 1.710651  |
| 83     | 7      | 0    | -5.233210 | 1.186073  | 1.806806  |
| 84     | 7      | 0    | -5.330422 | 2.455946  | 2.404373  |
| 85     | 6      | 0    | -4.214878 | 2.697325  | 3.332421  |
| 86     | 6      | 0    | -5.463915 | 3.521915  | 1.399949  |

|     |   |   |           |          |          |
|-----|---|---|-----------|----------|----------|
| 87  | 6 | 0 | -4.463549 | 3.997548 | 4.086994 |
| 88  | 1 | 0 | -3.258587 | 2.759921 | 2.788243 |
| 89  | 1 | 0 | -4.165869 | 1.848719 | 4.017128 |
| 90  | 6 | 0 | -5.748290 | 4.841458 | 2.106852 |
| 91  | 1 | 0 | -4.545449 | 3.615375 | 0.799004 |
| 92  | 1 | 0 | -6.285093 | 3.247355 | 0.735176 |
| 93  | 6 | 0 | -4.643734 | 5.162225 | 3.113495 |
| 94  | 1 | 0 | -3.626109 | 4.181020 | 4.764299 |
| 95  | 1 | 0 | -5.365822 | 3.884079 | 4.696819 |
| 96  | 1 | 0 | -5.838264 | 5.632533 | 1.358625 |
| 97  | 1 | 0 | -6.709673 | 4.762936 | 2.624916 |
| 98  | 1 | 0 | -4.876758 | 6.080694 | 3.657361 |
| 99  | 1 | 0 | -3.703568 | 5.330891 | 2.575466 |
| 100 | 1 | 0 | -5.967527 | 0.514649 | 2.016981 |

-----

### Structure 26ad (vacuum)

Energy (Hartrees): = -2381.6047972  
 No imaginary frequencies

Standard orientation:

| Center<br>Number | Atomic<br>Number | Atomic<br>Type | Coordinates (Angstroms) |           |           |
|------------------|------------------|----------------|-------------------------|-----------|-----------|
|                  |                  |                | X                       | Y         | Z         |
| 1                | 6                | 0              | 4.829864                | 2.807812  | -0.789681 |
| 2                | 6                | 0              | 3.777193                | 3.074510  | -1.625350 |
| 3                | 6                | 0              | 2.683816                | 2.136554  | -1.649930 |
| 4                | 6                | 0              | 2.741564                | 0.930879  | -0.881260 |
| 5                | 6                | 0              | 3.918536                | 0.636607  | -0.099820 |
| 6                | 6                | 0              | 4.913422                | 1.596836  | -0.049120 |
| 7                | 6                | 0              | -4.458053               | -5.635036 | -1.017658 |
| 8                | 6                | 0              | 0.494149                | -2.134612 | -3.136706 |
| 9                | 6                | 0              | 3.797152                | 4.351670  | -2.450875 |
| 10               | 6                | 0              | 1.579363                | 0.105038  | -0.891677 |
| 11               | 6                | 0              | 0.460532                | 0.396397  | -1.652458 |
| 12               | 6                | 0              | 0.436527                | 1.567800  | -2.449234 |
| 13               | 6                | 0              | 1.523229                | 2.402682  | -2.424535 |
| 14               | 6                | 0              | 5.007510                | 4.409019  | -3.394711 |
| 15               | 6                | 0              | 3.711095                | 5.598287  | -1.559101 |
| 16               | 6                | 0              | -0.772401               | 1.870226  | -3.296200 |
| 17               | 6                | 0              | 4.163436                | -0.642235 | 0.582508  |
| 18               | 6                | 0              | -4.317656               | 0.558285  | 0.733507  |
| 19               | 6                | 0              | -0.709035               | -0.529909 | -1.604490 |
| 20               | 6                | 0              | -0.699207               | -1.749612 | -2.301062 |
| 21               | 6                | 0              | -1.807572               | -2.566988 | -2.209248 |
| 22               | 6                | 0              | -2.945779               | -2.228646 | -1.451891 |
| 23               | 6                | 0              | -2.985214               | -0.980557 | -0.770172 |
| 24               | 6                | 0              | -1.834314               | -0.165842 | -0.866196 |
| 25               | 6                | 0              | -4.023816               | -4.542116 | -2.005623 |
| 26               | 6                | 0              | -4.836048               | -4.604369 | -3.305985 |
| 27               | 6                | 0              | -4.084237               | -3.148501 | -1.400864 |
| 28               | 6                | 0              | -5.238547               | -2.715145 | -0.840438 |
| 29               | 6                | 0              | -5.358319               | -1.436656 | -0.136883 |
| 30               | 6                | 0              | -4.201181               | -0.590516 | -0.051765 |
| 31               | 1                | 0              | -3.468181               | 1.211521  | 0.857475  |
| 32               | 1                | 0              | -1.795018               | -3.486374 | -2.776014 |
| 33               | 1                | 0              | 3.468543                | -1.446392 | 0.411178  |
| 34               | 1                | 0              | 1.472469                | 3.300686  | -3.021227 |
| 35               | 1                | 0              | -7.006956               | -2.891196 | -0.331254 |
| 36               | 1                | 0              | -4.273370               | -6.616851 | -1.461302 |
| 37               | 1                | 0              | 2.919561                | 4.363232  | -3.093202 |
| 38               | 8                | 0              | -1.824369               | 1.041309  | -0.224257 |
| 39               | 1                | 0              | 4.931266                | 5.290383  | -4.036746 |
| 40               | 1                | 0              | 5.038240                | 3.524028  | -4.034235 |
| 41               | 1                | 0              | 5.942187                | 4.467902  | -2.839276 |
| 42               | 1                | 0              | 3.673533                | 6.498550  | -2.177981 |
| 43               | 1                | 0              | 2.811146                | 5.569580  | -0.940377 |
| 44               | 1                | 0              | 4.579687                | 5.666633  | -0.904111 |
| 45               | 1                | 0              | 0.730783                | -1.351870 | -3.861931 |
| 46               | 1                | 0              | 0.304348                | -3.063661 | -3.674262 |
| 47               | 1                | 0              | 1.384161                | -2.272477 | -2.515549 |
| 48               | 8                | 0              | 5.869467                | 3.668208  | -0.656571 |
| 49               | 1                | 0              | 6.494764                | 3.259229  | -0.042673 |
| 50               | 8                | 0              | 6.037848                | 1.476199  | 0.672508  |
| 51               | 1                | 0              | 5.962376                | 0.600041  | 1.172450  |
| 52               | 1                | 0              | -0.600682               | 2.754657  | -3.909641 |
| 53               | 1                | 0              | -1.657562               | 2.045037  | -2.677448 |
| 54               | 1                | 0              | -1.006044               | 1.027983  | -3.952554 |
| 55               | 8                | 0              | 1.566099                | -1.014218 | -0.109497 |
| 56               | 8                | 0              | -6.469579               | -1.191994 | 0.382134  |
| 57               | 1                | 0              | -3.884830               | -5.567799 | -0.090239 |
| 58               | 1                | 0              | -5.516330               | -5.558728 | -0.775376 |
| 59               | 8                | 0              | -6.376535               | -3.438750 | -0.833131 |
| 60               | 1                | 0              | -2.986647               | -4.767228 | -2.249060 |
| 61               | 1                | 0              | -4.758728               | -5.597661 | -3.755788 |

|     |   |   |           |           |           |
|-----|---|---|-----------|-----------|-----------|
| 62  | 1 | 0 | -4.471667 | -3.869513 | -4.027929 |
| 63  | 1 | 0 | -5.888214 | -4.397096 | -3.103057 |
| 64  | 1 | 0 | 0.692657  | -1.422782 | -0.186760 |
| 65  | 1 | 0 | -0.954497 | 1.443596  | -0.353407 |
| 66  | 7 | 0 | 5.197242  | -0.780701 | 1.333173  |
| 67  | 6 | 0 | 4.423671  | -2.983936 | 2.044887  |
| 68  | 6 | 0 | 6.826224  | -2.411076 | 1.575589  |
| 69  | 6 | 0 | 4.915048  | -4.219577 | 2.806736  |
| 70  | 1 | 0 | 4.162124  | -3.301161 | 1.019648  |
| 71  | 6 | 0 | 7.272298  | -3.624329 | 2.383035  |
| 72  | 1 | 0 | 6.761360  | -2.710880 | 0.514109  |
| 73  | 6 | 0 | 6.247426  | -4.744373 | 2.298218  |
| 74  | 1 | 0 | 4.136508  | -4.983526 | 2.736911  |
| 75  | 1 | 0 | 5.013690  | -3.950984 | 3.864629  |
| 76  | 1 | 0 | 8.244149  | -3.949436 | 2.003139  |
| 77  | 1 | 0 | 7.410185  | -3.319854 | 3.427038  |
| 78  | 1 | 0 | 6.564173  | -5.611380 | 2.882664  |
| 79  | 1 | 0 | 6.148065  | -5.073771 | 1.257399  |
| 80  | 7 | 0 | 5.482687  | -1.959452 | 2.011409  |
| 81  | 7 | 0 | -5.407451 | 0.940528  | 1.381524  |
| 82  | 7 | 0 | -5.456474 | 2.117927  | 2.151648  |
| 83  | 6 | 0 | -4.498031 | 2.065253  | 3.276703  |
| 84  | 6 | 0 | -5.318303 | 3.314225  | 1.290455  |
| 85  | 6 | 0 | -4.682612 | 3.312234  | 4.138548  |
| 86  | 1 | 0 | -3.462451 | 2.068881  | 2.891616  |
| 87  | 6 | 0 | -5.498807 | 4.563487  | 2.150015  |
| 88  | 1 | 0 | -4.304795 | 3.340346  | 0.849873  |
| 89  | 6 | 0 | -4.525109 | 4.588707  | 3.321200  |
| 90  | 1 | 0 | -3.958562 | 3.278266  | 4.956777  |
| 91  | 1 | 0 | -5.684311 | 3.275356  | 4.581377  |
| 92  | 1 | 0 | -5.370030 | 5.443299  | 1.513965  |
| 93  | 1 | 0 | -6.528973 | 4.574295  | 2.523414  |
| 94  | 1 | 0 | -4.697137 | 5.468919  | 3.944931  |
| 95  | 1 | 0 | -3.498589 | 4.657565  | 2.942949  |
| 96  | 6 | 0 | 3.185160  | -2.454369 | 2.777282  |
| 97  | 1 | 0 | 3.498936  | -2.058245 | 3.745507  |
| 98  | 1 | 0 | 2.640803  | -1.674110 | 2.249547  |
| 99  | 1 | 0 | 2.493367  | -3.281218 | 2.951685  |
| 100 | 6 | 0 | 7.845494  | -1.281857 | 1.710078  |
| 101 | 1 | 0 | 7.719425  | -0.509999 | 0.952609  |
| 102 | 1 | 0 | 7.756575  | -0.824696 | 2.698907  |
| 103 | 1 | 0 | 8.851980  | -1.691696 | 1.605864  |
| 104 | 6 | 0 | -6.352469 | 3.278351  | 0.172510  |
| 105 | 1 | 0 | -6.189731 | 2.448601  | -0.515553 |
| 106 | 1 | 0 | -7.352710 | 3.180750  | 0.601801  |
| 107 | 1 | 0 | -6.307642 | 4.207878  | -0.398032 |
| 108 | 6 | 0 | -4.725124 | 0.804172  | 4.100846  |
| 109 | 1 | 0 | -5.766863 | 0.764283  | 4.428628  |
| 110 | 1 | 0 | -4.505647 | -0.103662 | 3.538687  |
| 111 | 1 | 0 | -4.082411 | 0.821584  | 4.983110  |
| 112 | 1 | 0 | -6.249202 | 0.374390  | 1.308237  |

### Structure 26ad (CHCl<sub>3</sub>)

Energy (Hartrees): = -2381.6494566  
No imaginary frequencies

Standard orientation:

| Center Number | Atomic Number | Atomic Type | Coordinates (Angstroms) |           |           |
|---------------|---------------|-------------|-------------------------|-----------|-----------|
|               |               |             | X                       | Y         | Z         |
| 1             | 6             | 0           | 4.903475                | 2.754495  | -0.846058 |
| 2             | 6             | 0           | 3.847490                | 3.032912  | -1.674551 |
| 3             | 6             | 0           | 2.724126                | 2.129446  | -1.659335 |
| 4             | 6             | 0           | 2.761832                | 0.932193  | -0.875714 |
| 5             | 6             | 0           | 3.941476                | 0.621587  | -0.101636 |
| 6             | 6             | 0           | 4.961335                | 1.558067  | -0.079189 |
| 7             | 6             | 0           | -4.516929               | -5.583910 | -1.192038 |
| 8             | 6             | 0           | 0.506674                | -2.081014 | -3.131301 |
| 9             | 6             | 0           | 3.887763                | 4.290478  | -2.530498 |
| 10            | 6             | 0           | 1.582225                | 0.127774  | -0.869392 |
| 11            | 6             | 0           | 0.463178                | 0.435528  | -1.623923 |
| 12            | 6             | 0           | 0.449536                | 1.611642  | -2.415623 |
| 13            | 6             | 0           | 1.554352                | 2.424042  | -2.410725 |
| 14            | 6             | 0           | 5.100121                | 4.320264  | -3.472462 |
| 15            | 6             | 0           | 3.811956                | 5.556057  | -1.666141 |
| 16            | 6             | 0           | -0.764444               | 1.948443  | -3.240264 |
| 17            | 6             | 0           | 4.164974                | -0.650695 | 0.604346  |
| 18            | 6             | 0           | -4.336062               | 0.552633  | 0.752978  |
| 19            | 6             | 0           | -0.711193               | -0.487647 | -1.592823 |
| 20            | 6             | 0           | -0.696145               | -1.696902 | -2.310774 |
| 21            | 6             | 0           | -1.810339               | -2.509586 | -2.254385 |
| 22            | 6             | 0           | -2.959346               | -2.178790 | -1.507650 |
| 23            | 6             | 0           | -3.002448               | -0.945429 | -0.799223 |
| 24            | 6             | 0           | -1.843792               | -0.133360 | -0.862009 |



|     |   |   |           |           |           |
|-----|---|---|-----------|-----------|-----------|
| 25  | 6 | 0 | -4.041733 | -4.469645 | -2.135940 |
| 26  | 6 | 0 | -4.809063 | -4.495744 | -3.463747 |
| 27  | 6 | 0 | -4.106280 | -3.089096 | -1.500279 |
| 28  | 6 | 0 | -5.266620 | -2.656683 | -0.950020 |
| 29  | 6 | 0 | -5.385882 | -1.398210 | -0.212790 |
| 30  | 6 | 0 | -4.224970 | -0.568089 | -0.083522 |
| 31  | 1 | 0 | -3.479804 | 1.188475  | 0.917077  |
| 32  | 1 | 0 | -1.791551 | -3.418347 | -2.838686 |
| 33  | 1 | 0 | 3.456849  | -1.446615 | 0.450816  |
| 34  | 1 | 0 | 1.508659  | 3.326215  | -3.002414 |
| 35  | 1 | 0 | -7.051984 | -2.839333 | -0.478373 |
| 36  | 1 | 0 | -4.305383 | -6.556202 | -1.645517 |
| 37  | 1 | 0 | 3.013850  | 4.295543  | -3.177567 |
| 38  | 8 | 0 | -1.846751 | 1.057307  | -0.196687 |
| 39  | 1 | 0 | 5.015351  | 5.174418  | -4.149930 |
| 40  | 1 | 0 | 5.142409  | 3.413018  | -4.080665 |
| 41  | 1 | 0 | 6.036939  | 4.410803  | -2.923986 |
| 42  | 1 | 0 | 3.789458  | 6.445338  | -2.302235 |
| 43  | 1 | 0 | 2.907353  | 5.554999  | -1.052386 |
| 44  | 1 | 0 | 4.676831  | 5.630024  | -1.005150 |
| 45  | 1 | 0 | 0.760775  | -1.295523 | -3.848038 |
| 46  | 1 | 0 | 0.317749  | -3.003884 | -3.680611 |
| 47  | 1 | 0 | 1.385402  | -2.235773 | -2.497656 |
| 48  | 8 | 0 | 5.964642  | 3.592856  | -0.746291 |
| 49  | 1 | 0 | 6.600518  | 3.190904  | -0.136530 |
| 50  | 8 | 0 | 6.086537  | 1.420712  | 0.637153  |
| 51  | 1 | 0 | 5.989772  | 0.550848  | 1.152655  |
| 52  | 1 | 0 | -0.594119 | 2.855985  | -3.820092 |
| 53  | 1 | 0 | -1.644189 | 2.105016  | -2.608820 |
| 54  | 1 | 0 | -1.005620 | 1.135052  | -3.930087 |
| 55  | 8 | 0 | 1.563984  | -0.983643 | -0.081486 |
| 56  | 8 | 0 | -6.506478 | -1.159600 | 0.296735  |
| 57  | 1 | 0 | -3.988758 | -5.536522 | -0.236263 |
| 58  | 1 | 0 | -5.586484 | -5.523067 | -0.996525 |
| 59  | 8 | 0 | -6.411179 | -3.372263 | -0.984329 |
| 60  | 1 | 0 | -2.999874 | -4.699007 | -2.351936 |
| 61  | 1 | 0 | -4.721394 | -5.478923 | -3.934757 |
| 62  | 1 | 0 | -4.417654 | -3.748664 | -4.159255 |
| 63  | 1 | 0 | -5.868261 | -4.287761 | -3.297413 |
| 64  | 1 | 0 | 0.683250  | -1.383881 | -0.123869 |
| 65  | 1 | 0 | -0.970858 | 1.462556  | -0.272714 |
| 66  | 7 | 0 | 5.199587  | -0.791072 | 1.354131  |
| 67  | 6 | 0 | 4.401481  | -2.970998 | 2.112876  |
| 68  | 6 | 0 | 6.815363  | -2.429646 | 1.640396  |
| 69  | 6 | 0 | 4.880322  | -4.198985 | 2.895292  |
| 70  | 1 | 0 | 4.139723  | -3.298813 | 1.092471  |
| 71  | 6 | 0 | 7.244792  | -3.632432 | 2.471548  |
| 72  | 1 | 0 | 6.747237  | -2.748225 | 0.585841  |
| 73  | 6 | 0 | 6.209454  | -4.743418 | 2.399698  |
| 74  | 1 | 0 | 4.094262  | -4.956028 | 2.833528  |
| 75  | 1 | 0 | 4.978728  | -3.916449 | 3.949827  |
| 76  | 1 | 0 | 8.214801  | -3.972298 | 2.099734  |
| 77  | 1 | 0 | 7.382024  | -3.313533 | 3.511726  |
| 78  | 1 | 0 | 6.515856  | -5.602913 | 3.000793  |
| 79  | 1 | 0 | 6.111664  | -5.088052 | 1.363721  |
| 80  | 7 | 0 | 5.471602  | -1.954200 | 2.063152  |
| 81  | 7 | 0 | -5.424601 | 0.916553  | 1.403802  |
| 82  | 7 | 0 | -5.483768 | 2.064573  | 2.219263  |
| 83  | 6 | 0 | -4.515198 | 1.985490  | 3.337715  |
| 84  | 6 | 0 | -5.364382 | 3.292557  | 1.395981  |
| 85  | 6 | 0 | -4.713822 | 3.199400  | 4.242348  |
| 86  | 1 | 0 | -3.484009 | 2.019052  | 2.946691  |
| 87  | 6 | 0 | -5.557486 | 4.508241  | 2.299096  |
| 88  | 1 | 0 | -4.354220 | 3.341593  | 0.953054  |
| 89  | 6 | 0 | -4.580816 | 4.505494  | 3.468344  |
| 90  | 1 | 0 | -3.980025 | 3.146641  | 5.050996  |
| 91  | 1 | 0 | -5.710203 | 3.132692  | 4.694448  |
| 92  | 1 | 0 | -5.439538 | 5.410382  | 1.692878  |
| 93  | 1 | 0 | -6.587048 | 4.495796  | 2.674989  |
| 94  | 1 | 0 | -4.765822 | 5.359926  | 4.123635  |
| 95  | 1 | 0 | -3.556809 | 4.603051  | 3.089609  |
| 96  | 6 | 0 | 3.168635  | -2.419699 | 2.836286  |
| 97  | 1 | 0 | 3.472560  | -2.048953 | 3.818242  |
| 98  | 1 | 0 | 2.651166  | -1.615284 | 2.316226  |
| 99  | 1 | 0 | 2.451152  | -3.230176 | 2.984329  |
| 100 | 6 | 0 | 7.846330  | -1.309912 | 1.755258  |
| 101 | 1 | 0 | 7.739851  | -0.556758 | 0.975200  |
| 102 | 1 | 0 | 7.762181  | -0.823132 | 2.730986  |
| 103 | 1 | 0 | 8.848342  | -1.735296 | 1.666912  |
| 104 | 6 | 0 | -6.403470 | 3.280051  | 0.283258  |
| 105 | 1 | 0 | -6.233904 | 2.477363  | -0.436027 |
| 106 | 1 | 0 | -7.403472 | 3.157074  | 0.708443  |
| 107 | 1 | 0 | -6.371094 | 4.228697  | -0.256773 |
| 108 | 6 | 0 | -4.721465 | 0.693954  | 4.117404  |
| 109 | 1 | 0 | -5.762896 | 0.620040  | 4.442350  |
| 110 | 1 | 0 | -4.480036 | -0.192623 | 3.529152  |
| 111 | 1 | 0 | -4.081969 | 0.694538  | 5.002742  |
| 112 | 1 | 0 | -6.273562 | 0.366932  | 1.297142  |

-----  
**Structure 26ad (DMSO)**

Energy (Hartrees): = -2381.6373954  
 No imaginary frequencies

Standard orientation:

| Center<br>Number | Atomic<br>Number | Atomic<br>Type | Coordinates (Angstroms) |           |           |
|------------------|------------------|----------------|-------------------------|-----------|-----------|
|                  |                  |                | X                       | Y         | Z         |
| 1                | 6                | 0              | 4.904883                | 2.713083  | -0.867935 |
| 2                | 6                | 0              | 3.860097                | 2.980488  | -1.714636 |
| 3                | 6                | 0              | 2.737781                | 2.074773  | -1.704750 |
| 4                | 6                | 0              | 2.759997                | 0.895350  | -0.893503 |
| 5                | 6                | 0              | 3.930318                | 0.592876  | -0.102296 |
| 6                | 6                | 0              | 4.953329                | 1.526106  | -0.085221 |
| 7                | 6                | 0              | -4.650103               | -5.509158 | -1.198867 |
| 8                | 6                | 0              | 0.477434                | -2.151157 | -3.123216 |
| 9                | 6                | 0              | 3.911136                | 4.225755  | -2.587422 |
| 10               | 6                | 0              | 1.574393                | 0.100024  | -0.878166 |
| 11               | 6                | 0              | 0.471079                | 0.390961  | -1.661054 |
| 12               | 6                | 0              | 0.479617                | 1.537941  | -2.493890 |
| 13               | 6                | 0              | 1.585581                | 2.349173  | -2.490508 |
| 14               | 6                | 0              | 5.126086                | 4.229129  | -3.525287 |
| 15               | 6                | 0              | 3.844230                | 5.504680  | -1.743051 |
| 16               | 6                | 0              | -0.715706               | 1.849246  | -3.353831 |
| 17               | 6                | 0              | 4.143807                | -0.671607 | 0.621302  |
| 18               | 6                | 0              | -4.304622               | 0.599314  | 0.753011  |
| 19               | 6                | 0              | -0.715912               | -0.514537 | -1.612598 |
| 20               | 6                | 0              | -0.721464               | -1.733238 | -2.314554 |
| 21               | 6                | 0              | -1.853389               | -2.521229 | -2.257333 |
| 22               | 6                | 0              | -2.998570               | -2.156079 | -1.520149 |
| 23               | 6                | 0              | -3.014090               | -0.920257 | -0.815097 |
| 24               | 6                | 0              | -1.842229               | -0.127982 | -0.888763 |
| 25               | 6                | 0              | -4.138170               | -4.417370 | -2.148084 |
| 26               | 6                | 0              | -4.893864               | -4.434086 | -3.482039 |
| 27               | 6                | 0              | -4.172257               | -3.031599 | -1.522782 |
| 28               | 6                | 0              | -5.327774               | -2.555426 | -0.998264 |
| 29               | 6                | 0              | -5.421256               | -1.283510 | -0.278063 |
| 30               | 6                | 0              | -4.231926               | -0.503462 | -0.114411 |
| 31               | 1                | 0              | -3.414551               | 1.165330  | 0.983996  |
| 32               | 1                | 0              | -1.850374               | -3.435343 | -2.833778 |
| 33               | 1                | 0              | 3.432250                | -1.466677 | 0.478125  |
| 34               | 1                | 0              | 1.554380                | 3.231351  | -3.112694 |
| 35               | 1                | 0              | -7.119004               | -2.658128 | -0.554517 |
| 36               | 1                | 0              | -4.480102               | -6.490085 | -1.651212 |
| 37               | 1                | 0              | 3.038092                | 4.232139  | -3.235124 |
| 38               | 8                | 0              | -1.830360               | 1.072906  | -0.245227 |
| 39               | 1                | 0              | 5.058217                | 5.080155  | -4.208499 |
| 40               | 1                | 0              | 5.154870                | 3.317640  | -4.128255 |
| 41               | 1                | 0              | 6.062577                | 4.307097  | -2.973780 |
| 42               | 1                | 0              | 3.821315                | 6.382441  | -2.394735 |
| 43               | 1                | 0              | 2.940876                | 5.517717  | -1.127379 |
| 44               | 1                | 0              | 4.711455                | 5.588442  | -1.086299 |
| 45               | 1                | 0              | 0.751007                | -1.378506 | -3.847104 |
| 46               | 1                | 0              | 0.272572                | -3.076231 | -3.662887 |
| 47               | 1                | 0              | 1.348870                | -2.318198 | -2.482507 |
| 48               | 8                | 0              | 5.968630                | 3.547823  | -0.764827 |
| 49               | 1                | 0              | 6.587600                | 3.147440  | -0.137333 |
| 50               | 8                | 0              | 6.072519                | 1.394762  | 0.640905  |
| 51               | 1                | 0              | 5.973697                | 0.522528  | 1.155159  |
| 52               | 1                | 0              | -0.521866               | 2.723491  | -3.975806 |
| 53               | 1                | 0              | -1.601825               | 2.052830  | -2.744529 |
| 54               | 1                | 0              | -0.959260               | 1.004661  | -4.004539 |
| 55               | 8                | 0              | 1.532761                | -0.979079 | -0.049186 |
| 56               | 8                | 0              | -6.547335               | -1.001376 | 0.197265  |
| 57               | 1                | 0              | -4.112632               | -5.480831 | -0.247341 |
| 58               | 1                | 0              | -5.715188               | -5.404849 | -0.996727 |
| 59               | 8                | 0              | -6.497383               | -3.229123 | -1.043217 |
| 60               | 1                | 0              | -3.101596               | -4.675828 | -2.355169 |
| 61               | 1                | 0              | -4.815933               | -5.419637 | -3.949505 |
| 62               | 1                | 0              | -4.482405               | -3.696018 | -4.175857 |
| 63               | 1                | 0              | -5.951636               | -4.209543 | -3.327365 |
| 64               | 1                | 0              | 0.657614                | -1.388925 | -0.116635 |
| 65               | 1                | 0              | -0.961246               | 1.483327  | -0.363255 |
| 66               | 7                | 0              | 5.177639                | -0.807046 | 1.373287  |
| 67               | 6                | 0              | 4.365195                | -2.971660 | 2.160620  |
| 68               | 6                | 0              | 6.782037                | -2.455435 | 1.678861  |
| 69               | 6                | 0              | 4.834907                | -4.191060 | 2.960972  |
| 70               | 1                | 0              | 4.105051                | -3.310732 | 1.144292  |
| 71               | 6                | 0              | 7.203216                | -3.647888 | 2.528203  |
| 72               | 1                | 0              | 6.704966                | -2.790849 | 0.630781  |
| 73               | 6                | 0              | 6.159900                | -4.752107 | 2.474228  |
| 74               | 1                | 0              | 4.042655                | -4.942086 | 2.908303  |
| 75               | 1                | 0              | 4.934637                | -3.895273 | 4.011944  |

|     |   |   |           |           |           |
|-----|---|---|-----------|-----------|-----------|
| 76  | 1 | 0 | 8.170109  | -3.999889 | 2.159914  |
| 77  | 1 | 0 | 7.343936  | -3.313933 | 3.563387  |
| 78  | 1 | 0 | 6.460595  | -5.603994 | 3.088986  |
| 79  | 1 | 0 | 6.059282  | -5.111982 | 1.443792  |
| 80  | 7 | 0 | 5.442762  | -1.961358 | 2.099847  |
| 81  | 7 | 0 | -5.397974 | 1.021927  | 1.355286  |
| 82  | 7 | 0 | -5.423384 | 2.135889  | 2.218990  |
| 83  | 6 | 0 | -4.609581 | 1.887873  | 3.434617  |
| 84  | 6 | 0 | -5.057588 | 3.376505  | 1.492163  |
| 85  | 6 | 0 | -4.781368 | 3.072355  | 4.381899  |
| 86  | 1 | 0 | -3.544219 | 1.816357  | 3.158925  |
| 87  | 6 | 0 | -5.230352 | 4.562105  | 2.437312  |
| 88  | 1 | 0 | -3.999074 | 3.329655  | 1.186593  |
| 89  | 6 | 0 | -4.412001 | 4.389817  | 3.711170  |
| 90  | 1 | 0 | -4.162910 | 2.895909  | 5.265884  |
| 91  | 1 | 0 | -5.827136 | 3.102397  | 4.710133  |
| 92  | 1 | 0 | -4.938649 | 5.470231  | 1.903440  |
| 93  | 1 | 0 | -6.294340 | 4.652035  | 2.686515  |
| 94  | 1 | 0 | -4.581664 | 5.226712  | 4.392830  |
| 95  | 1 | 0 | -3.345002 | 4.384699  | 3.460237  |
| 96  | 6 | 0 | 3.135285  | -2.403522 | 2.874904  |
| 97  | 1 | 0 | 3.437428  | -2.028702 | 3.856319  |
| 98  | 1 | 0 | 2.625822  | -1.598898 | 2.347045  |
| 99  | 1 | 0 | 2.410609  | -3.206958 | 3.025828  |
| 100 | 6 | 0 | 7.823097  | -1.343605 | 1.771742  |
| 101 | 1 | 0 | 7.721241  | -0.602730 | 0.979293  |
| 102 | 1 | 0 | 7.749051  | -0.839564 | 2.739820  |
| 103 | 1 | 0 | 8.820508  | -1.780114 | 1.685941  |
| 104 | 6 | 0 | -5.937170 | 3.541297  | 0.260438  |
| 105 | 1 | 0 | -5.758532 | 2.767840  | -0.488415 |
| 106 | 1 | 0 | -6.991739 | 3.507185  | 0.549368  |
| 107 | 1 | 0 | -5.738244 | 4.510163  | -0.202818 |
| 108 | 6 | 0 | -5.050850 | 0.593451  | 4.103321  |
| 109 | 1 | 0 | -6.125603 | 0.624318  | 4.304173  |
| 110 | 1 | 0 | -4.839011 | -0.283562 | 3.489245  |
| 111 | 1 | 0 | -4.524354 | 0.475288  | 5.052771  |
| 112 | 1 | 0 | -6.276134 | 0.537532  | 1.189483  |

### Structure 26bb (vacuum)

Energy (Hartrees): = -2381.6145661

No imaginary frequencies

Standard orientation:

| Center<br>Number | Atomic<br>Number | Atomic<br>Type | Coordinates (Angstroms) |           |           |
|------------------|------------------|----------------|-------------------------|-----------|-----------|
|                  |                  |                | X                       | Y         | Z         |
| 1                | 6                | 0              | 4.766893                | 3.099738  | -0.577672 |
| 2                | 6                | 0              | 3.696221                | 3.358255  | -1.392640 |
| 3                | 6                | 0              | 2.666492                | 2.353419  | -1.499029 |
| 4                | 6                | 0              | 2.800122                | 1.108763  | -0.813838 |
| 5                | 6                | 0              | 3.990756                | 0.834527  | -0.050218 |
| 6                | 6                | 0              | 4.922554                | 1.849726  | 0.086103  |
| 7                | 6                | 0              | -3.308816               | -5.834775 | -1.338194 |
| 8                | 6                | 0              | 0.775725                | -2.065226 | -3.105545 |
| 9                | 6                | 0              | 3.624332                | 4.695444  | -2.112615 |
| 10               | 6                | 0              | 1.695390                | 0.212241  | -0.864860 |
| 11               | 6                | 0              | 0.563157                | 0.468512  | -1.619127 |
| 12               | 6                | 0              | 0.470866                | 1.677873  | -2.352568 |
| 13               | 6                | 0              | 1.496351                | 2.585102  | -2.269067 |
| 14               | 6                | 0              | 4.810205                | 4.901833  | -3.066074 |
| 15               | 6                | 0              | 3.481527                | 5.858948  | -1.120947 |
| 16               | 6                | 0              | -0.744873               | 1.943285  | -3.201435 |
| 17               | 6                | 0              | 4.356092                | -0.484396 | 0.472519  |
| 18               | 6                | 0              | -4.336474               | 0.416742  | 0.474715  |
| 19               | 6                | 0              | -0.553466               | -0.521984 | -1.611271 |
| 20               | 6                | 0              | -0.456437               | -1.745592 | -2.298537 |
| 21               | 6                | 0              | -1.511295               | -2.633240 | -2.219604 |
| 22               | 6                | 0              | -2.685007               | -2.359138 | -1.490800 |
| 23               | 6                | 0              | -2.802395               | -1.119442 | -0.807859 |
| 24               | 6                | 0              | -1.703017               | -0.236753 | -0.876436 |
| 25               | 6                | 0              | -3.711420               | -4.642925 | -2.216892 |
| 26               | 6                | 0              | -5.028389               | -4.913126 | -2.959054 |
| 27               | 6                | 0              | -3.746546               | -3.362643 | -1.398819 |
| 28               | 6                | 0              | -4.741683               | -3.164926 | -0.499842 |
| 29               | 6                | 0              | -4.916588               | -1.914502 | 0.242915  |
| 30               | 6                | 0              | -3.987468               | -0.851146 | 0.002502  |
| 31               | 1                | 0              | -3.782259               | 1.298674  | 0.189747  |
| 32               | 1                | 0              | -1.401793               | -3.582199 | -2.724444 |
| 33               | 1                | 0              | 3.821504                | -1.369416 | 0.147685  |
| 34               | 1                | 0              | 1.387223                | 3.508978  | -2.816290 |
| 35               | 1                | 0              | -6.289316               | -3.637196 | 0.394640  |
| 36               | 1                | 0              | -3.251227               | -6.747870 | -1.936476 |
| 37               | 1                | 0              | 2.732955                | 4.705359  | -2.735567 |
| 38               | 8                | 0              | -1.771202               | 0.938678  | -0.183676 |

|     |   |   |           |           |           |
|-----|---|---|-----------|-----------|-----------|
| 39  | 1 | 0 | 4.669566  | 5.827361  | -3.630129 |
| 40  | 1 | 0 | 4.881310  | 4.076386  | -3.777695 |
| 41  | 1 | 0 | 5.749935  | 4.971036  | -2.520243 |
| 42  | 1 | 0 | 3.364139  | 6.799960  | -1.664322 |
| 43  | 1 | 0 | 2.603872  | 5.718774  | -0.485751 |
| 44  | 1 | 0 | 4.362026  | 5.936380  | -0.483438 |
| 45  | 1 | 0 | 0.967404  | -1.282828 | -3.844421 |
| 46  | 1 | 0 | 0.658364  | -3.015254 | -3.626786 |
| 47  | 1 | 0 | 1.663552  | -2.128842 | -2.470166 |
| 48  | 8 | 0 | 5.752459  | 4.011625  | -0.386189 |
| 49  | 1 | 0 | 6.407620  | 3.601655  | 0.194550  |
| 50  | 8 | 0 | 6.055140  | 1.745591  | 0.793318  |
| 51  | 1 | 0 | 6.052586  | 0.833276  | 1.224833  |
| 52  | 1 | 0 | -0.638606 | 2.882754  | -3.743707 |
| 53  | 1 | 0 | -1.650355 | 1.996271  | -2.590658 |
| 54  | 1 | 0 | -0.894812 | 1.136551  | -3.923540 |
| 55  | 8 | 0 | 1.763914  | -0.926720 | -0.121269 |
| 56  | 8 | 0 | -5.925086 | -1.842462 | 0.983968  |
| 57  | 1 | 0 | -2.335440 | -5.665607 | -0.871325 |
| 58  | 1 | 0 | -4.048515 | -5.985066 | -0.549552 |
| 59  | 8 | 0 | -5.700004 | -4.079179 | -0.242693 |
| 60  | 1 | 0 | -2.957572 | -4.528430 | -2.994810 |
| 61  | 1 | 0 | -4.892743 | -5.757765 | -3.639381 |
| 62  | 1 | 0 | -5.322940 | -4.044011 | -3.551555 |
| 63  | 1 | 0 | -5.835876 | -5.150196 | -2.269092 |
| 64  | 1 | 0 | 0.915934  | -1.386041 | -0.192254 |
| 65  | 1 | 0 | -0.910758 | 1.374841  | -0.242000 |
| 66  | 7 | 0 | 5.350347  | -0.617199 | 1.269393  |
| 67  | 6 | 0 | 7.085824  | -2.181840 | 1.332270  |
| 68  | 6 | 0 | 5.327530  | -2.170161 | 3.041293  |
| 69  | 6 | 0 | 7.452168  | -3.620738 | 1.684665  |
| 70  | 1 | 0 | 7.677402  | -1.498222 | 1.967487  |
| 71  | 6 | 0 | 5.672531  | -3.608508 | 3.424250  |
| 72  | 1 | 0 | 5.942836  | -1.480775 | 3.645870  |
| 73  | 6 | 0 | 7.134574  | -3.933665 | 3.141793  |
| 74  | 1 | 0 | 8.514022  | -3.773887 | 1.474543  |
| 75  | 1 | 0 | 6.884843  | -4.288728 | 1.026912  |
| 76  | 1 | 0 | 5.438378  | -3.753557 | 4.482190  |
| 77  | 1 | 0 | 5.024157  | -4.277784 | 2.847646  |
| 78  | 1 | 0 | 7.348170  | -4.980840 | 3.369135  |
| 79  | 1 | 0 | 7.774351  | -3.325103 | 3.791301  |
| 80  | 7 | 0 | 5.647336  | -1.971699 | 1.608538  |
| 81  | 7 | 0 | -5.359339 | 0.666323  | 1.272487  |
| 82  | 7 | 0 | -5.676167 | 1.987583  | 1.614043  |
| 83  | 6 | 0 | -7.091690 | 2.246670  | 1.263735  |
| 84  | 6 | 0 | -5.377868 | 2.219079  | 3.047977  |
| 85  | 6 | 0 | -7.424291 | 3.700166  | 1.589616  |
| 86  | 1 | 0 | -7.738191 | 1.594312  | 1.879015  |
| 87  | 6 | 0 | -5.699302 | 3.673568  | 3.384154  |
| 88  | 1 | 0 | -6.021096 | 1.563241  | 3.661549  |
| 89  | 6 | 0 | -7.145044 | 4.022718  | 3.052893  |
| 90  | 1 | 0 | -8.473506 | 3.881149  | 1.342590  |
| 91  | 1 | 0 | -6.816554 | 4.342634  | 0.942636  |
| 92  | 1 | 0 | -5.489222 | 3.840914  | 4.443541  |
| 93  | 1 | 0 | -5.021059 | 4.312949  | 2.807944  |
| 94  | 1 | 0 | -7.344437 | 5.076443  | 3.260321  |
| 95  | 1 | 0 | -7.816687 | 3.435610  | 3.689767  |
| 96  | 6 | 0 | 7.389164  | -1.889627 | -0.132316 |
| 97  | 1 | 0 | 6.731146  | -2.484918 | -0.771378 |
| 98  | 1 | 0 | 7.247017  | -0.836114 | -0.374290 |
| 99  | 1 | 0 | 8.424812  | -2.153873 | -0.355825 |
| 100 | 6 | 0 | 3.853188  | -1.887623 | 3.304604  |
| 101 | 1 | 0 | 3.601935  | -0.838172 | 3.153475  |
| 102 | 1 | 0 | 3.233794  | -2.489712 | 2.633855  |
| 103 | 1 | 0 | 3.607432  | -2.151589 | 4.335387  |
| 104 | 6 | 0 | -3.915339 | 1.908969  | 3.339873  |
| 105 | 1 | 0 | -3.679253 | 0.854197  | 3.199719  |
| 106 | 1 | 0 | -3.272553 | 2.496934  | 2.679104  |
| 107 | 1 | 0 | -3.684557 | 2.173460  | 4.373575  |
| 108 | 6 | 0 | -7.332500 | 1.944152  | -0.209679 |
| 109 | 1 | 0 | -6.628919 | 2.513348  | -0.822897 |
| 110 | 1 | 0 | -7.211282 | 0.884095  | -0.434819 |
| 111 | 1 | 0 | -8.348074 | 2.235875  | -0.483498 |
| 112 | 1 | 0 | -5.938209 | -0.121270 | 1.582765  |

-----

### Structure 26bb (CHCl<sub>3</sub>)

Energy (Hartrees): = -2381.660049  
 No imaginary frequencies

Standard orientation:

| Center<br>Number | Atomic<br>Number | Atomic<br>Type | Coordinates (Angstroms) |          |           |
|------------------|------------------|----------------|-------------------------|----------|-----------|
|                  |                  |                | X                       | Y        | Z         |
| 1                | 6                | 0              | 4.742013                | 3.135784 | -0.559260 |

|    |   |   |           |           |           |
|----|---|---|-----------|-----------|-----------|
| 2  | 6 | 0 | 3.661152  | 3.394448  | -1.362062 |
| 3  | 6 | 0 | 2.644561  | 2.376245  | -1.481421 |
| 4  | 6 | 0 | 2.797688  | 1.123684  | -0.814995 |
| 5  | 6 | 0 | 4.000786  | 0.850222  | -0.069694 |
| 6  | 6 | 0 | 4.921229  | 1.874789  | 0.078036  |
| 7  | 6 | 0 | -3.235271 | -5.877551 | -1.259279 |
| 8  | 6 | 0 | 0.793318  | -2.081110 | -3.066167 |
| 9  | 6 | 0 | 3.559359  | 4.745148  | -2.054167 |
| 10 | 6 | 0 | 1.695942  | 0.220840  | -0.854716 |
| 11 | 6 | 0 | 0.554006  | 0.472094  | -1.596706 |
| 12 | 6 | 0 | 0.444202  | 1.689778  | -2.316628 |
| 13 | 6 | 0 | 1.462549  | 2.606764  | -2.234403 |
| 14 | 6 | 0 | 4.738176  | 5.002211  | -3.003058 |
| 15 | 6 | 0 | 3.387134  | 5.882671  | -1.038465 |
| 16 | 6 | 0 | -0.781429 | 1.966376  | -3.146154 |
| 17 | 6 | 0 | 4.386617  | -0.475005 | 0.425682  |
| 18 | 6 | 0 | -4.373636 | 0.400833  | 0.438212  |
| 19 | 6 | 0 | -0.554530 | -0.529686 | -1.587331 |
| 20 | 6 | 0 | -0.442931 | -1.757783 | -2.268251 |
| 21 | 6 | 0 | -1.488537 | -2.656750 | -2.187835 |
| 22 | 6 | 0 | -2.669076 | -2.390044 | -1.465439 |
| 23 | 6 | 0 | -2.805644 | -1.144650 | -0.795824 |
| 24 | 6 | 0 | -1.708863 | -0.253989 | -0.856101 |
| 25 | 6 | 0 | -3.653971 | -4.703676 | -2.153364 |
| 26 | 6 | 0 | -4.960872 | -5.008755 | -2.898790 |
| 27 | 6 | 0 | -3.712906 | -3.410139 | -1.355921 |
| 28 | 6 | 0 | -4.713115 | -3.210778 | -0.461689 |
| 29 | 6 | 0 | -4.913913 | -1.949435 | 0.255224  |
| 30 | 6 | 0 | -4.001188 | -0.879386 | 0.000570  |
| 31 | 1 | 0 | -3.831640 | 1.281181  | 0.124775  |
| 32 | 1 | 0 | -1.364470 | -3.607899 | -2.686045 |
| 33 | 1 | 0 | 3.862330  | -1.359695 | 0.082667  |
| 34 | 1 | 0 | 1.335167  | 3.536327  | -2.769010 |
| 35 | 1 | 0 | -6.262148 | -3.701094 | 0.433749  |
| 36 | 1 | 0 | -3.158152 | -6.796177 | -1.847806 |
| 37 | 1 | 0 | 2.668096  | 4.747247  | -2.676806 |
| 38 | 8 | 0 | -1.793724 | 0.911776  | -0.154058 |
| 39 | 1 | 0 | 4.570506  | 5.933000  | -3.551760 |
| 40 | 1 | 0 | 4.833195  | 4.193674  | -3.732147 |
| 41 | 1 | 0 | 5.679083  | 5.090083  | -2.460720 |
| 42 | 1 | 0 | 3.242318  | 6.831927  | -1.561377 |
| 43 | 1 | 0 | 2.513258  | 5.707138  | -0.405812 |
| 44 | 1 | 0 | 4.264755  | 5.975023  | -0.397592 |
| 45 | 1 | 0 | 0.974479  | -1.323546 | -3.833484 |
| 46 | 1 | 0 | 0.688209  | -3.048879 | -3.557636 |
| 47 | 1 | 0 | 1.683247  | -2.116669 | -2.431261 |
| 48 | 8 | 0 | 5.710301  | 4.063423  | -0.356788 |
| 49 | 1 | 0 | 6.386459  | 3.667430  | 0.211667  |
| 50 | 8 | 0 | 6.059052  | 1.768987  | 0.775802  |
| 51 | 1 | 0 | 6.068513  | 0.845889  | 1.188484  |
| 52 | 1 | 0 | -0.688378 | 2.924632  | -3.658029 |
| 53 | 1 | 0 | -1.683335 | 1.994142  | -2.528191 |
| 54 | 1 | 0 | -0.929952 | 1.185886  | -3.897349 |
| 55 | 8 | 0 | 1.785713  | -0.912265 | -0.108306 |
| 56 | 8 | 0 | -5.929709 | -1.880634 | 0.990393  |
| 57 | 1 | 0 | -2.265768 | -5.689908 | -0.790261 |
| 58 | 1 | 0 | -3.972939 | -6.038032 | -0.469794 |
| 59 | 8 | 0 | -5.655787 | -4.139787 | -0.191162 |
| 60 | 1 | 0 | -2.897192 | -4.590670 | -2.928036 |
| 61 | 1 | 0 | -4.804997 | -5.861765 | -3.564812 |
| 62 | 1 | 0 | -5.268537 | -4.156828 | -3.510502 |
| 63 | 1 | 0 | -5.771978 | -5.251026 | -2.213657 |
| 64 | 1 | 0 | 0.940634  | -1.383042 | -0.146837 |
| 65 | 1 | 0 | -0.935836 | 1.358698  | -0.179115 |
| 66 | 7 | 0 | 5.383879  | -0.607106 | 1.217797  |
| 67 | 6 | 0 | 7.141816  | -2.149681 | 1.278346  |
| 68 | 6 | 0 | 5.384452  | -2.154860 | 2.990549  |
| 69 | 6 | 0 | 7.529919  | -3.580586 | 1.639697  |
| 70 | 1 | 0 | 7.718332  | -1.452750 | 1.911396  |
| 71 | 6 | 0 | 5.751252  | -3.585077 | 3.381806  |
| 72 | 1 | 0 | 5.994431  | -1.452860 | 3.584470  |
| 73 | 6 | 0 | 7.217102  | -3.891153 | 3.098333  |
| 74 | 1 | 0 | 8.594501  | -3.716042 | 1.430997  |
| 75 | 1 | 0 | 6.975479  | -4.262691 | 0.984832  |
| 76 | 1 | 0 | 5.522135  | -3.724251 | 4.441696  |
| 77 | 1 | 0 | 5.110714  | -4.269085 | 2.813112  |
| 78 | 1 | 0 | 7.443781  | -4.935371 | 3.328366  |
| 79 | 1 | 0 | 7.849514  | -3.271468 | 3.744740  |
| 80 | 7 | 0 | 5.697059  | -1.959297 | 1.552190  |
| 81 | 7 | 0 | -5.399103 | 0.660882  | 1.220020  |
| 82 | 7 | 0 | -5.717695 | 1.986001  | 1.551278  |
| 83 | 6 | 0 | -7.144198 | 2.226238  | 1.217831  |
| 84 | 6 | 0 | -5.412198 | 2.218891  | 2.987594  |
| 85 | 6 | 0 | -7.491201 | 3.674783  | 1.549629  |
| 86 | 1 | 0 | -7.769150 | 1.562771  | 1.840956  |
| 87 | 6 | 0 | -5.749354 | 3.668382  | 3.327916  |
| 88 | 1 | 0 | -6.045155 | 1.553000  | 3.598713  |
| 89 | 6 | 0 | -7.202267 | 3.998974  | 3.010357  |

|     |   |   |           |           |           |
|-----|---|---|-----------|-----------|-----------|
| 90  | 1 | 0 | -8.545378 | 3.840492  | 1.313041  |
| 91  | 1 | 0 | -6.898949 | 4.327214  | 0.897728  |
| 92  | 1 | 0 | -5.532237 | 3.834344  | 4.386145  |
| 93  | 1 | 0 | -5.084161 | 4.318567  | 2.748003  |
| 94  | 1 | 0 | -7.411859 | 5.050688  | 3.219568  |
| 95  | 1 | 0 | -7.860219 | 3.402181  | 3.652590  |
| 96  | 6 | 0 | 7.443151  | -1.861044 | -0.186573 |
| 97  | 1 | 0 | 6.802694  | -2.472987 | -0.828871 |
| 98  | 1 | 0 | 7.282889  | -0.811435 | -0.437359 |
| 99  | 1 | 0 | 8.485733  | -2.104435 | -0.403920 |
| 100 | 6 | 0 | 3.908861  | -1.890840 | 3.262395  |
| 101 | 1 | 0 | 3.636677  | -0.847421 | 3.100083  |
| 102 | 1 | 0 | 3.287535  | -2.514747 | 2.612664  |
| 103 | 1 | 0 | 3.679643  | -2.140161 | 4.301173  |
| 104 | 6 | 0 | -3.945204 | 1.927581  | 3.272359  |
| 105 | 1 | 0 | -3.691920 | 0.876180  | 3.129843  |
| 106 | 1 | 0 | -3.308092 | 2.530104  | 2.618222  |
| 107 | 1 | 0 | -3.718323 | 2.188107  | 4.308519  |
| 108 | 6 | 0 | -7.399801 | 1.924289  | -0.252214 |
| 109 | 1 | 0 | -6.721569 | 2.510417  | -0.878995 |
| 110 | 1 | 0 | -7.263438 | 0.867122  | -0.485567 |
| 111 | 1 | 0 | -8.426879 | 2.194484  | -0.506989 |
| 112 | 1 | 0 | -5.968475 | -0.116677 | 1.567312  |

### Structure 26bb (DMSO)

Energy (Hartrees): = -2381.6474668

No imaginary frequencies

Standard orientation:

| Center<br>Number | Atomic<br>Number | Atomic<br>Type | Coordinates (Angstroms) |           |           |
|------------------|------------------|----------------|-------------------------|-----------|-----------|
|                  |                  |                | X                       | Y         | Z         |
| 1                | 6                | 0              | 4.736218                | 3.123812  | -0.553652 |
| 2                | 6                | 0              | 3.670310                | 3.378686  | -1.377828 |
| 3                | 6                | 0              | 2.648631                | 2.365275  | -1.499456 |
| 4                | 6                | 0              | 2.789407                | 1.116149  | -0.823714 |
| 5                | 6                | 0              | 3.983223                | 0.841848  | -0.064022 |
| 6                | 6                | 0              | 4.903082                | 1.865514  | 0.093475  |
| 7                | 6                | 0              | -3.237155               | -5.862274 | -1.283285 |
| 8                | 6                | 0              | 0.763636                | -2.059872 | -3.127816 |
| 9                | 6                | 0              | 3.580860                | 4.722166  | -2.084536 |
| 10               | 6                | 0              | 1.685253                | 0.217065  | -0.869997 |
| 11               | 6                | 0              | 0.552555                | 0.470622  | -1.624608 |
| 12               | 6                | 0              | 0.454764                | 1.683849  | -2.352786 |
| 13               | 6                | 0              | 1.476268                | 2.597479  | -2.267400 |
| 14               | 6                | 0              | 4.781640                | 4.982795  | -3.003753 |
| 15               | 6                | 0              | 3.374650                | 5.864564  | -1.081680 |
| 16               | 6                | 0              | -0.762522               | 1.956645  | -3.194481 |
| 17               | 6                | 0              | 4.362831                | -0.483538 | 0.435454  |
| 18               | 6                | 0              | -4.357430               | 0.404185  | 0.450600  |
| 19               | 6                | 0              | -0.561502               | -0.524656 | -1.616213 |
| 20               | 6                | 0              | -0.461520               | -1.745902 | -2.310685 |
| 21               | 6                | 0              | -1.506819               | -2.644971 | -2.224334 |
| 22               | 6                | 0              | -2.676451               | -2.381571 | -1.482155 |
| 23               | 6                | 0              | -2.802774               | -1.140704 | -0.801340 |
| 24               | 6                | 0              | -1.704755               | -0.251455 | -0.867613 |
| 25               | 6                | 0              | -3.670646               | -4.689856 | -2.171438 |
| 26               | 6                | 0              | -4.985732               | -4.997685 | -2.899757 |
| 27               | 6                | 0              | -3.722318               | -3.399588 | -1.368858 |
| 28               | 6                | 0              | -4.711283               | -3.203187 | -0.461260 |
| 29               | 6                | 0              | -4.895554               | -1.948776 | 0.274790  |
| 30               | 6                | 0              | -3.987813               | -0.877879 | 0.011335  |
| 31               | 1                | 0              | -3.820295               | 1.283635  | 0.125927  |
| 32               | 1                | 0              | -1.390679               | -3.591154 | -2.734012 |
| 33               | 1                | 0              | 3.841855                | -1.367966 | 0.086394  |
| 34               | 1                | 0              | 1.356609                | 3.525082  | -2.807549 |
| 35               | 1                | 0              | -6.244060               | -3.680632 | 0.454964  |
| 36               | 1                | 0              | -3.165744               | -6.780459 | -1.873107 |
| 37               | 1                | 0              | 2.707036                | 4.714607  | -2.730860 |
| 38               | 8                | 0              | -1.774963               | 0.905046  | -0.150924 |
| 39               | 1                | 0              | 4.615800                | 5.906349  | -3.564919 |
| 40               | 1                | 0              | 4.905103                | 4.169710  | -3.723741 |
| 41               | 1                | 0              | 5.707821                | 5.087077  | -2.439393 |
| 42               | 1                | 0              | 3.252069                | 6.811378  | -1.614502 |
| 43               | 1                | 0              | 2.476924                | 5.695405  | -0.481253 |
| 44               | 1                | 0              | 4.228328                | 5.957812  | -0.408933 |
| 45               | 1                | 0              | 0.937444                | -1.288789 | -3.883684 |
| 46               | 1                | 0              | 0.649957                | -3.019308 | -3.633304 |
| 47               | 1                | 0              | 1.661184                | -2.109058 | -2.503967 |
| 48               | 8                | 0              | 5.704646                | 4.048000  | -0.338600 |
| 49               | 1                | 0              | 6.367772                | 3.645150  | 0.239823  |
| 50               | 8                | 0              | 6.029090                | 1.760614  | 0.808839  |
| 51               | 1                | 0              | 6.034939                | 0.831349  | 1.212011  |
| 52               | 1                | 0              | -0.663283               | 2.910607  | -3.712921 |

|     |   |   |           |           |           |
|-----|---|---|-----------|-----------|-----------|
| 53  | 1 | 0 | -1.669901 | 1.991768  | -2.584258 |
| 54  | 1 | 0 | -0.905550 | 1.168813  | -3.939502 |
| 55  | 8 | 0 | 1.759827  | -0.910754 | -0.115237 |
| 56  | 8 | 0 | -5.895796 | -1.888880 | 1.030590  |
| 57  | 1 | 0 | -2.260737 | -5.671980 | -0.829538 |
| 58  | 1 | 0 | -3.963184 | -6.024553 | -0.483050 |
| 59  | 8 | 0 | -5.657609 | -4.126157 | -0.184364 |
| 60  | 1 | 0 | -2.923259 | -4.575222 | -2.954698 |
| 61  | 1 | 0 | -4.835070 | -5.847752 | -3.570596 |
| 62  | 1 | 0 | -5.304811 | -4.145410 | -3.505618 |
| 63  | 1 | 0 | -5.787046 | -5.245111 | -2.204809 |
| 64  | 1 | 0 | 0.921723  | -1.390592 | -0.187461 |
| 65  | 1 | 0 | -0.924335 | 1.363023  | -0.210947 |
| 66  | 7 | 0 | 5.353937  | -0.614601 | 1.235260  |
| 67  | 6 | 0 | 7.116118  | -2.152684 | 1.288715  |
| 68  | 6 | 0 | 5.370478  | -2.154906 | 3.013778  |
| 69  | 6 | 0 | 7.510604  | -3.580447 | 1.654807  |
| 70  | 1 | 0 | 7.693161  | -1.450635 | 1.914665  |
| 71  | 6 | 0 | 5.743272  | -3.582197 | 3.408198  |
| 72  | 1 | 0 | 5.983874  | -1.449253 | 3.599024  |
| 73  | 6 | 0 | 7.207742  | -3.885172 | 3.116605  |
| 74  | 1 | 0 | 8.574441  | -3.711898 | 1.440393  |
| 75  | 1 | 0 | 6.955330  | -4.268461 | 1.006387  |
| 76  | 1 | 0 | 5.521069  | -3.716040 | 4.470118  |
| 77  | 1 | 0 | 5.100821  | -4.271159 | 2.847164  |
| 78  | 1 | 0 | 7.438537  | -4.927846 | 3.349347  |
| 79  | 1 | 0 | 7.842097  | -3.260580 | 3.756074  |
| 80  | 7 | 0 | 5.671258  | -1.965260 | 1.571094  |
| 81  | 7 | 0 | -5.373699 | 0.668266  | 1.239949  |
| 82  | 7 | 0 | -5.687847 | 1.996036  | 1.567663  |
| 83  | 6 | 0 | -7.114821 | 2.237403  | 1.231298  |
| 84  | 6 | 0 | -5.388761 | 2.223116  | 3.007472  |
| 85  | 6 | 0 | -7.463402 | 3.683841  | 1.569041  |
| 86  | 1 | 0 | -7.738996 | 1.569399  | 1.848885  |
| 87  | 6 | 0 | -5.728357 | 3.670380  | 3.353204  |
| 88  | 1 | 0 | -6.023754 | 1.553292  | 3.610793  |
| 89  | 6 | 0 | -7.180148 | 4.001256  | 3.032056  |
| 90  | 1 | 0 | -8.516995 | 3.848034  | 1.329245  |
| 91  | 1 | 0 | -6.870123 | 4.341063  | 0.922459  |
| 92  | 1 | 0 | -5.515507 | 3.829069  | 4.413347  |
| 93  | 1 | 0 | -5.061578 | 4.325298  | 2.779964  |
| 94  | 1 | 0 | -7.390562 | 5.052173  | 3.244712  |
| 95  | 1 | 0 | -7.839495 | 3.400431  | 3.668801  |
| 96  | 6 | 0 | 7.406754  | -1.871200 | -0.179462 |
| 97  | 1 | 0 | 6.764916  | -2.488260 | -0.815912 |
| 98  | 1 | 0 | 7.242598  | -0.823212 | -0.435587 |
| 99  | 1 | 0 | 8.448811  | -2.112931 | -0.400976 |
| 100 | 6 | 0 | 3.896663  | -1.894321 | 3.295948  |
| 101 | 1 | 0 | 3.617903  | -0.853592 | 3.125918  |
| 102 | 1 | 0 | 3.271415  | -2.528819 | 2.660012  |
| 103 | 1 | 0 | 3.678980  | -2.133877 | 4.339415  |
| 104 | 6 | 0 | -3.922677 | 1.932620  | 3.296125  |
| 105 | 1 | 0 | -3.667351 | 0.882250  | 3.147545  |
| 106 | 1 | 0 | -3.283084 | 2.542079  | 2.650538  |
| 107 | 1 | 0 | -3.702062 | 2.185537  | 4.335525  |
| 108 | 6 | 0 | -7.364379 | 1.945233  | -0.241494 |
| 109 | 1 | 0 | -6.688154 | 2.539127  | -0.863537 |
| 110 | 1 | 0 | -7.222928 | 0.890329  | -0.482626 |
| 111 | 1 | 0 | -8.392303 | 2.212432  | -0.496156 |
| 112 | 1 | 0 | -5.943595 | -0.101727 | 1.602096  |

### Structure 27 (vacuum)

Energy (Hartrees): = -1112.7639881  
No imaginary frequencies

Standard orientation:

| Center Number | Atomic Number | Atomic Type | Coordinates (Angstroms) |           |           |
|---------------|---------------|-------------|-------------------------|-----------|-----------|
|               |               |             | X                       | Y         | Z         |
| 1             | 6             | 0           | -1.608918               | -1.879587 | -0.147416 |
| 2             | 6             | 0           | -2.634923               | -1.016060 | 0.133481  |
| 3             | 6             | 0           | -2.367092               | 0.399188  | 0.099719  |
| 4             | 6             | 0           | -1.028725               | 0.868601  | -0.056088 |
| 5             | 6             | 0           | 0.051939                | -0.080677 | -0.174406 |
| 6             | 6             | 0           | -0.260107               | -1.429002 | -0.274671 |
| 7             | 6             | 0           | -4.046405               | -1.524042 | 0.400179  |
| 8             | 6             | 0           | -0.860027               | 2.282480  | -0.160269 |
| 9             | 6             | 0           | -1.917872               | 3.152701  | -0.062133 |
| 10            | 6             | 0           | -3.232183               | 2.686603  | 0.107863  |
| 11            | 6             | 0           | -3.434927               | 1.333167  | 0.178581  |
| 12            | 6             | 0           | -4.147786               | -2.769609 | 1.305784  |
| 13            | 6             | 0           | -4.820378               | -1.724156 | -0.910405 |
| 14            | 6             | 0           | -4.369217               | 3.669847  | 0.184927  |
| 15            | 6             | 0           | 1.466661                | 0.312305  | -0.099345 |

|    |   |   |           |           |           |
|----|---|---|-----------|-----------|-----------|
| 16 | 1 | 0 | 1.684794  | 1.316452  | 0.227800  |
| 17 | 1 | 0 | -4.453933 | 0.981931  | 0.259667  |
| 18 | 1 | 0 | -4.549145 | -0.741496 | 0.965809  |
| 19 | 1 | 0 | -5.107792 | -2.755012 | 1.825290  |
| 20 | 1 | 0 | -3.354041 | -2.791272 | 2.053891  |
| 21 | 1 | 0 | -4.126198 | -3.716756 | 0.757154  |
| 22 | 1 | 0 | -5.848071 | -2.040669 | -0.712881 |
| 23 | 1 | 0 | -4.843849 | -0.801742 | -1.494066 |
| 24 | 1 | 0 | -4.344352 | -2.490527 | -1.530606 |
| 25 | 8 | 0 | -1.743538 | -3.223155 | -0.281569 |
| 26 | 1 | 0 | -2.673937 | -3.450486 | -0.292932 |
| 27 | 8 | 0 | 0.642693  | -2.392440 | -0.451754 |
| 28 | 1 | 0 | 1.522373  | -1.951033 | -0.540210 |
| 29 | 1 | 0 | -5.326725 | 3.157672  | 0.283710  |
| 30 | 1 | 0 | -4.407314 | 4.294032  | -0.711700 |
| 31 | 1 | 0 | -4.250838 | 4.335759  | 1.043832  |
| 32 | 8 | 0 | 0.394394  | 2.782027  | -0.393485 |
| 33 | 1 | 0 | 0.317731  | 3.727882  | -0.543078 |
| 34 | 7 | 0 | 2.397057  | -0.526038 | -0.386960 |
| 35 | 6 | 0 | 4.090180  | 1.056285  | 0.316778  |
| 36 | 6 | 0 | 4.505308  | -1.351780 | 0.083796  |
| 37 | 6 | 0 | 5.584347  | 1.330240  | 0.163180  |
| 38 | 1 | 0 | 3.806219  | 1.021604  | 1.384387  |
| 39 | 1 | 0 | 3.533204  | 1.871934  | -0.148884 |
| 40 | 6 | 0 | 5.995669  | -1.110815 | -0.107339 |
| 41 | 1 | 0 | 4.294975  | -1.574465 | 1.143658  |
| 42 | 1 | 0 | 4.163973  | -2.201464 | -0.508852 |
| 43 | 6 | 0 | 6.425817  | 0.149457  | 0.639869  |
| 44 | 1 | 0 | 5.832936  | 2.239002  | 0.716638  |
| 45 | 1 | 0 | 5.794068  | 1.520935  | -0.893865 |
| 46 | 1 | 0 | 6.547696  | -1.985541 | 0.244412  |
| 47 | 1 | 0 | 6.202375  | -0.993855 | -1.175766 |
| 48 | 1 | 0 | 7.488489  | 0.350198  | 0.486471  |
| 49 | 1 | 0 | 6.274643  | 0.002883  | 1.715936  |
| 50 | 7 | 0 | 3.725648  | -0.189557 | -0.345422 |
| 51 | 1 | 0 | -1.732788 | 4.220868  | -0.147198 |

### Structure 27 (CHCl<sub>3</sub>)

Energy (Hartrees): = -1112.794847  
No imaginary frequencies

Standard orientation:

| Center<br>Number | Atomic<br>Number | Atomic<br>Type | Coordinates (Angstroms) |           |           |
|------------------|------------------|----------------|-------------------------|-----------|-----------|
|                  |                  |                | X                       | Y         | Z         |
| 1                | 6                | 0              | -1.592687               | -1.878856 | -0.155708 |
| 2                | 6                | 0              | -2.628012               | -1.026085 | 0.130098  |
| 3                | 6                | 0              | -2.370947               | 0.392435  | 0.092204  |
| 4                | 6                | 0              | -1.037725               | 0.875089  | -0.075237 |
| 5                | 6                | 0              | 0.052631                | -0.063371 | -0.195389 |
| 6                | 6                | 0              | -0.250040               | -1.414234 | -0.287998 |
| 7                | 6                | 0              | -4.032688               | -1.545557 | 0.414330  |
| 8                | 6                | 0              | -0.878965               | 2.291286  | -0.190264 |
| 9                | 6                | 0              | -1.942330               | 3.153937  | -0.077163 |
| 10               | 6                | 0              | -3.250563               | 2.675153  | 0.117790  |
| 11               | 6                | 0              | -3.445362               | 1.319140  | 0.189769  |
| 12               | 6                | 0              | -4.110690               | -2.793030 | 1.316867  |
| 13               | 6                | 0              | -4.826181               | -1.750835 | -0.883319 |
| 14               | 6                | 0              | -4.390965               | 3.651395  | 0.221743  |
| 15               | 6                | 0              | 1.465825                | 0.340343  | -0.111589 |
| 16               | 1                | 0              | 1.680777                | 1.340015  | 0.232310  |
| 17               | 1                | 0              | -4.460196               | 0.959944  | 0.287755  |
| 18               | 1                | 0              | -4.533942               | -0.767594 | 0.987340  |
| 19               | 1                | 0              | -5.073180               | -2.794805 | 1.832975  |
| 20               | 1                | 0              | -3.322893               | -2.797986 | 2.072897  |
| 21               | 1                | 0              | -4.068028               | -3.738815 | 0.768168  |
| 22               | 1                | 0              | -5.850518               | -2.063327 | -0.662038 |
| 23               | 1                | 0              | -4.864233               | -0.832243 | -1.473360 |
| 24               | 1                | 0              | -4.365669               | -2.525467 | -1.505765 |
| 25               | 8                | 0              | -1.709724               | -3.226048 | -0.283029 |
| 26               | 1                | 0              | -2.636811               | -3.470645 | -0.342783 |
| 27               | 8                | 0              | 0.668524                | -2.370390 | -0.461519 |
| 28               | 1                | 0              | 1.544373                | -1.912778 | -0.551435 |
| 29               | 1                | 0              | -5.343373               | 3.134922  | 0.348410  |
| 30               | 1                | 0              | -4.456052               | 4.273670  | -0.675097 |
| 31               | 1                | 0              | -4.250901               | 4.322201  | 1.073967  |
| 32               | 8                | 0              | 0.366284                | 2.787785  | -0.447541 |
| 33               | 1                | 0              | 0.299520                | 3.740889  | -0.579984 |
| 34               | 7                | 0              | 2.398004                | -0.493147 | -0.409495 |
| 35               | 6                | 0              | 4.091721                | 1.062247  | 0.345924  |
| 36               | 6                | 0              | 4.498053                | -1.346159 | 0.048532  |
| 37               | 6                | 0              | 5.589418                | 1.328974  | 0.222335  |
| 38               | 1                | 0              | 3.791216                | 0.995881  | 1.406287  |
| 39               | 1                | 0              | 3.548290                | 1.894999  | -0.104741 |



|    |   |   |           |           |           |
|----|---|---|-----------|-----------|-----------|
| 40 | 6 | 0 | 5.991391  | -1.106012 | -0.113474 |
| 41 | 1 | 0 | 4.270154  | -1.595575 | 1.097738  |
| 42 | 1 | 0 | 4.163245  | -2.176902 | -0.574736 |
| 43 | 6 | 0 | 6.416547  | 0.129573  | 0.676303  |
| 44 | 1 | 0 | 5.832092  | 2.219152  | 0.807683  |
| 45 | 1 | 0 | 5.818118  | 1.551992  | -0.824875 |
| 46 | 1 | 0 | 6.531285  | -1.994581 | 0.222349  |
| 47 | 1 | 0 | 6.217004  | -0.960496 | -1.175079 |
| 48 | 1 | 0 | 7.482329  | 0.328517  | 0.542118  |
| 49 | 1 | 0 | 6.248877  | -0.047728 | 1.745175  |
| 50 | 7 | 0 | 3.726796  | -0.165321 | -0.356481 |
| 51 | 1 | 0 | -1.766330 | 4.222661  | -0.171284 |

### Structure 27 (DMSO)

Energy (Hartrees): = -1112.7913118  
No imaginary frequencies

Standard orientation:

| Center<br>Number | Atomic<br>Number | Atomic<br>Type | Coordinates (Angstroms) |           |           |
|------------------|------------------|----------------|-------------------------|-----------|-----------|
|                  |                  |                | X                       | Y         | Z         |
| 1                | 6                | 0              | -1.583037               | -1.878779 | -0.154745 |
| 2                | 6                | 0              | -2.621987               | -1.031174 | 0.136148  |
| 3                | 6                | 0              | -2.372877               | 0.388834  | 0.098190  |
| 4                | 6                | 0              | -1.042576               | 0.879063  | -0.072001 |
| 5                | 6                | 0              | 0.053156                | -0.053591 | -0.191777 |
| 6                | 6                | 0              | -0.242128               | -1.406883 | -0.286537 |
| 7                | 6                | 0              | -4.024453               | -1.558036 | 0.416259  |
| 8                | 6                | 0              | -0.891138               | 2.295923  | -0.192633 |
| 9                | 6                | 0              | -1.959262               | 3.153315  | -0.080405 |
| 10               | 6                | 0              | -3.264691               | 2.666680  | 0.117429  |
| 11               | 6                | 0              | -3.453211               | 1.309347  | 0.194292  |
| 12               | 6                | 0              | -4.100227               | -2.806528 | 1.316870  |
| 13               | 6                | 0              | -4.808824               | -1.767806 | -0.885406 |
| 14               | 6                | 0              | -4.410723               | 3.636195  | 0.214586  |
| 15               | 6                | 0              | 1.465062                | 0.356971  | -0.102678 |
| 16               | 1                | 0              | 1.678313                | 1.352016  | 0.257119  |
| 17               | 1                | 0              | -4.466300               | 0.945628  | 0.295097  |
| 18               | 1                | 0              | -4.534084               | -0.783465 | 0.986028  |
| 19               | 1                | 0              | -5.066831               | -2.812948 | 1.824821  |
| 20               | 1                | 0              | -3.319784               | -2.806469 | 2.080861  |
| 21               | 1                | 0              | -4.051365               | -3.753476 | 0.769762  |
| 22               | 1                | 0              | -5.830530               | -2.090458 | -0.667592 |
| 23               | 1                | 0              | -4.855241               | -0.846343 | -1.470896 |
| 24               | 1                | 0              | -4.340107               | -2.537154 | -1.508208 |
| 25               | 8                | 0              | -1.698878               | -3.223796 | -0.290783 |
| 26               | 1                | 0              | -2.628638               | -3.468838 | -0.303592 |
| 27               | 8                | 0              | 0.683616                | -2.355169 | -0.462079 |
| 28               | 1                | 0              | 1.555350                | -1.886336 | -0.548875 |
| 29               | 1                | 0              | -5.359757               | 3.114269  | 0.343926  |
| 30               | 1                | 0              | -4.476739               | 4.252684  | -0.686133 |
| 31               | 1                | 0              | -4.273635               | 4.314534  | 1.061244  |
| 32               | 8                | 0              | 0.349299                | 2.795385  | -0.458191 |
| 33               | 1                | 0              | 0.282401                | 3.753689  | -0.555923 |
| 34               | 7                | 0              | 2.397663                | -0.471444 | -0.414805 |
| 35               | 6                | 0              | 4.097722                | 1.065000  | 0.365247  |
| 36               | 6                | 0              | 4.493711                | -1.341649 | 0.028209  |
| 37               | 6                | 0              | 5.596285                | 1.325973  | 0.242834  |
| 38               | 1                | 0              | 3.799439                | 0.979081  | 1.424223  |
| 39               | 1                | 0              | 3.557863                | 1.908242  | -0.069336 |
| 40               | 6                | 0              | 5.987316                | -1.104644 | -0.131927 |
| 41               | 1                | 0              | 4.266604                | -1.602792 | 1.074363  |
| 42               | 1                | 0              | 4.154281                | -2.162034 | -0.606582 |
| 43               | 6                | 0              | 6.418096                | 0.116063  | 0.677030  |
| 44               | 1                | 0              | 5.843236                | 2.205960  | 0.841388  |
| 45               | 1                | 0              | 5.825341                | 1.564408  | -0.801087 |
| 46               | 1                | 0              | 6.523157                | -2.000990 | 0.189181  |
| 47               | 1                | 0              | 6.213135                | -0.942853 | -1.191298 |
| 48               | 1                | 0              | 7.484581                | 0.312277  | 0.544097  |
| 49               | 1                | 0              | 6.249619                | -0.077599 | 1.742850  |
| 50               | 7                | 0              | 3.726719                | -0.150112 | -0.358052 |
| 51               | 1                | 0              | -1.790567               | 4.222850  | -0.180939 |

### Structure 28 (vacuum)

Energy (Hartrees): = -1112.7465402  
Imaginary frequency -392.77

Standard orientation:

| Center<br>Number | Atomic<br>Number | Atomic<br>Type | Coordinates (Angstroms) |   |   |
|------------------|------------------|----------------|-------------------------|---|---|
|                  |                  |                | X                       | Y | Z |

|    |   |   |           |           |           |
|----|---|---|-----------|-----------|-----------|
| 1  | 6 | 0 | 1.657084  | -1.872382 | -0.125742 |
| 2  | 6 | 0 | 2.695091  | -0.969747 | -0.120228 |
| 3  | 6 | 0 | 2.370177  | 0.428089  | -0.081365 |
| 4  | 6 | 0 | 1.007205  | 0.846466  | -0.154770 |
| 5  | 6 | 0 | -0.038772 | -0.130794 | -0.239141 |
| 6  | 6 | 0 | 0.301362  | -1.460881 | -0.236150 |
| 7  | 6 | 0 | 4.148330  | -1.427287 | -0.096983 |
| 8  | 6 | 0 | 0.748525  | 2.250533  | -0.087867 |
| 9  | 6 | 0 | 1.761305  | 3.165764  | 0.041283  |
| 10 | 6 | 0 | 3.104350  | 2.751885  | 0.130808  |
| 11 | 6 | 0 | 3.387785  | 1.413578  | 0.068369  |
| 12 | 6 | 0 | 4.492748  | -2.605941 | -1.032032 |
| 13 | 6 | 0 | 4.620019  | -1.700093 | 1.337855  |
| 14 | 6 | 0 | 4.186130  | 3.785731  | 0.294252  |
| 15 | 6 | 0 | -1.476229 | 0.221650  | -0.348613 |
| 16 | 1 | 0 | -1.751735 | 0.948708  | -1.103144 |
| 17 | 1 | 0 | 4.421506  | 1.114292  | 0.168623  |
| 18 | 1 | 0 | 4.736108  | -0.598239 | -0.486442 |
| 19 | 1 | 0 | 5.544496  | -2.540401 | -1.317234 |
| 20 | 1 | 0 | 3.890577  | -2.591633 | -1.941786 |
| 21 | 1 | 0 | 4.382056  | -3.589302 | -0.561934 |
| 22 | 1 | 0 | 5.676250  | -1.982125 | 1.355564  |
| 23 | 1 | 0 | 4.481767  | -0.817931 | 1.966111  |
| 24 | 1 | 0 | 4.045061  | -2.516051 | 1.787968  |
| 25 | 8 | 0 | 1.809810  | -3.221233 | -0.040735 |
| 26 | 1 | 0 | 2.732721  | -3.430724 | 0.108563  |
| 27 | 8 | 0 | -0.635132 | -2.440342 | -0.421624 |
| 28 | 1 | 0 | -0.823705 | -2.859192 | 0.422984  |
| 29 | 1 | 0 | 5.166065  | 3.319059  | 0.398096  |
| 30 | 1 | 0 | 4.004709  | 4.401778  | 1.178726  |
| 31 | 1 | 0 | 4.216624  | 4.453553  | -0.570775 |
| 32 | 8 | 0 | -0.548187 | 2.667664  | -0.151078 |
| 33 | 1 | 0 | -0.570537 | 3.617348  | -0.006216 |
| 34 | 7 | 0 | -2.303490 | -0.343468 | 0.438702  |
| 35 | 6 | 0 | -4.140450 | 0.765230  | -0.705389 |
| 36 | 6 | 0 | -4.421924 | -1.228733 | 0.694796  |
| 37 | 6 | 0 | -5.605902 | 1.131688  | -0.482800 |
| 38 | 1 | 0 | -4.013904 | 0.222340  | -1.659783 |
| 39 | 1 | 0 | -3.552207 | 1.683259  | -0.764436 |
| 40 | 6 | 0 | -5.878641 | -0.878592 | 0.964480  |
| 41 | 1 | 0 | -4.359325 | -1.931944 | -0.153416 |
| 42 | 1 | 0 | -3.955968 | -1.706320 | 1.556954  |
| 43 | 6 | 0 | -6.460599 | -0.104405 | -0.216867 |
| 44 | 1 | 0 | -5.969407 | 1.680206  | -1.355460 |
| 45 | 1 | 0 | -5.666442 | 1.805139  | 0.378032  |
| 46 | 1 | 0 | -6.441996 | -1.796619 | 1.148906  |
| 47 | 1 | 0 | -5.934297 | -0.265350 | 1.869693  |
| 48 | 1 | 0 | -7.497627 | 0.180458  | -0.023844 |
| 49 | 1 | 0 | -6.460409 | -0.746205 | -1.105996 |
| 50 | 7 | 0 | -3.636211 | -0.030547 | 0.405039  |
| 51 | 1 | 0 | 1.520050  | 4.224735  | 0.088179  |

### Structure 28 (CHCl<sub>3</sub>)

Energy (Hartrees): = -1112.7794426  
 Imaginary frequency -366.08

Standard orientation:

| Center Number | Atomic Number | Atomic Type | Coordinates (Angstroms) |           |           |
|---------------|---------------|-------------|-------------------------|-----------|-----------|
|               |               |             | X                       | Y         | Z         |
| 1             | 6             | 0           | 1.660246                | -1.883873 | -0.102741 |
| 2             | 6             | 0           | 2.697588                | -0.979376 | -0.125262 |
| 3             | 6             | 0           | 2.368290                | 0.419710  | -0.082419 |
| 4             | 6             | 0           | 1.004164                | 0.837901  | -0.130438 |
| 5             | 6             | 0           | -0.041483               | -0.141620 | -0.205398 |
| 6             | 6             | 0           | 0.301133                | -1.471399 | -0.194358 |
| 7             | 6             | 0           | 4.157974                | -1.418324 | -0.146977 |
| 8             | 6             | 0           | 0.741591                | 2.242254  | -0.053165 |
| 9             | 6             | 0           | 1.755972                | 3.159913  | 0.052807  |
| 10            | 6             | 0           | 3.102338                | 2.746435  | 0.105482  |
| 11            | 6             | 0           | 3.388856                | 1.406976  | 0.038384  |
| 12            | 6             | 0           | 4.480625                | -2.644598 | -1.022529 |
| 13            | 6             | 0           | 4.708157                | -1.597365 | 1.273826  |
| 14            | 6             | 0           | 4.185203                | 3.781206  | 0.249706  |
| 15            | 6             | 0           | -1.478374               | 0.213434  | -0.329593 |
| 16            | 1             | 0           | -1.746154               | 0.914606  | -1.111432 |
| 17            | 1             | 0           | 4.425434                | 1.107926  | 0.109640  |
| 18            | 1             | 0           | 4.707365                | -0.603462 | -0.616357 |
| 19            | 1             | 0           | 5.526857                | -2.589818 | -1.331253 |
| 20            | 1             | 0           | 3.865962                | -2.678332 | -1.924434 |
| 21            | 1             | 0           | 4.382570                | -3.600910 | -0.498316 |
| 22            | 1             | 0           | 5.771826                | -1.850321 | 1.247406  |
| 23            | 1             | 0           | 4.583756                | -0.685226 | 1.861994  |

|    |   |   |           |           |           |
|----|---|---|-----------|-----------|-----------|
| 24 | 1 | 0 | 4.182406  | -2.403735 | 1.795492  |
| 25 | 8 | 0 | 1.811936  | -3.231883 | -0.019722 |
| 26 | 1 | 0 | 2.728237  | -3.447718 | 0.173445  |
| 27 | 8 | 0 | -0.638068 | -2.455073 | -0.358581 |
| 28 | 1 | 0 | -0.851540 | -2.836953 | 0.500875  |
| 29 | 1 | 0 | 4.125077  | 4.521466  | -0.552756 |
| 30 | 1 | 0 | 5.175200  | 3.324531  | 0.219826  |
| 31 | 1 | 0 | 4.084085  | 4.319122  | 1.196570  |
| 32 | 8 | 0 | -0.555673 | 2.649055  | -0.079902 |
| 33 | 1 | 0 | -0.588144 | 3.604934  | 0.045478  |
| 34 | 7 | 0 | -2.315472 | -0.318352 | 0.471440  |
| 35 | 6 | 0 | -4.138222 | 0.739565  | -0.744020 |
| 36 | 6 | 0 | -4.438817 | -1.193328 | 0.736895  |
| 37 | 6 | 0 | -5.609938 | 1.104671  | -0.570001 |
| 38 | 1 | 0 | -3.988039 | 0.149303  | -1.665342 |
| 39 | 1 | 0 | -3.558204 | 1.659544  | -0.838350 |
| 40 | 6 | 0 | -5.903251 | -0.842718 | 0.956998  |
| 41 | 1 | 0 | -4.350577 | -1.927630 | -0.081330 |
| 42 | 1 | 0 | -3.996245 | -1.634755 | 1.630814  |
| 43 | 6 | 0 | -6.463881 | -0.123061 | -0.268039 |
| 44 | 1 | 0 | -5.953644 | 1.609239  | -1.476404 |
| 45 | 1 | 0 | -5.696109 | 1.818482  | 0.255754  |
| 46 | 1 | 0 | -6.461662 | -1.758557 | 1.166071  |
| 47 | 1 | 0 | -5.986144 | -0.194315 | 1.835812  |
| 48 | 1 | 0 | -7.505420 | 0.165493  | -0.106354 |
| 49 | 1 | 0 | -6.443014 | -0.802784 | -1.128146 |
| 50 | 7 | 0 | -3.650154 | -0.000584 | 0.415857  |
| 51 | 1 | 0 | 1.510916  | 4.217203  | 0.110916  |

### Structure 28 (DMSO)

Energy (Hartrees): = -1112.7751443  
Imaginary frequency -405.23

Standard orientation:

| Center<br>Number | Atomic<br>Number | Atomic<br>Type | Coordinates (Angstroms) |           |           |
|------------------|------------------|----------------|-------------------------|-----------|-----------|
|                  |                  |                | X                       | Y         | Z         |
| 1                | 6                | 0              | 1.667993                | -1.886002 | -0.107041 |
| 2                | 6                | 0              | 2.701793                | -0.976656 | -0.125662 |
| 3                | 6                | 0              | 2.366791                | 0.421393  | -0.081534 |
| 4                | 6                | 0              | 1.000578                | 0.834952  | -0.128971 |
| 5                | 6                | 0              | -0.040854               | -0.149240 | -0.207848 |
| 6                | 6                | 0              | 0.306946                | -1.478150 | -0.201216 |
| 7                | 6                | 0              | 4.164297                | -1.408473 | -0.139733 |
| 8                | 6                | 0              | 0.732180                | 2.238509  | -0.047710 |
| 9                | 6                | 0              | 1.743823                | 3.160165  | 0.051481  |
| 10               | 6                | 0              | 3.092002                | 2.750939  | 0.102196  |
| 11               | 6                | 0              | 3.384523                | 1.411961  | 0.038699  |
| 12               | 6                | 0              | 4.498660                | -2.638964 | -1.004242 |
| 13               | 6                | 0              | 4.706922                | -1.575858 | 1.284984  |
| 14               | 6                | 0              | 4.170781                | 3.790867  | 0.231407  |
| 15               | 6                | 0              | -1.478535               | 0.202734  | -0.334982 |
| 16               | 1                | 0              | -1.747799               | 0.903037  | -1.117289 |
| 17               | 1                | 0              | 4.422472                | 1.117714  | 0.110908  |
| 18               | 1                | 0              | 4.712200                | -0.594057 | -0.611251 |
| 19               | 1                | 0              | 5.547214                | -2.579103 | -1.303538 |
| 20               | 1                | 0              | 3.893947                | -2.680493 | -1.912832 |
| 21               | 1                | 0              | 4.404118                | -3.593207 | -0.474890 |
| 22               | 1                | 0              | 5.773240                | -1.816890 | 1.263400  |
| 23               | 1                | 0              | 4.571898                | -0.661521 | 1.867726  |
| 24               | 1                | 0              | 4.189012                | -2.387516 | 1.806496  |
| 25               | 8                | 0              | 1.825656                | -3.231063 | -0.023735 |
| 26               | 1                | 0              | 2.746675                | -3.440966 | 0.156961  |
| 27               | 8                | 0              | -0.627614               | -2.464108 | -0.374177 |
| 28               | 1                | 0              | -0.848201               | -2.844285 | 0.484385  |
| 29               | 1                | 0              | 5.154070                | 3.329845  | 0.333127  |
| 30               | 1                | 0              | 3.993559                | 4.425893  | 1.103503  |
| 31               | 1                | 0              | 4.185732                | 4.443439  | -0.646187 |
| 32               | 8                | 0              | -0.566544               | 2.639743  | -0.059478 |
| 33               | 1                | 0              | -0.596348               | 3.601028  | 0.028303  |
| 34               | 7                | 0              | -2.315027               | -0.329428 | 0.467305  |
| 35               | 6                | 0              | -4.138114               | 0.741119  | -0.739840 |
| 36               | 6                | 0              | -4.442476               | -1.204049 | 0.724778  |
| 37               | 6                | 0              | -5.606880               | 1.111722  | -0.555574 |
| 38               | 1                | 0              | -3.996005               | 0.154877  | -1.664518 |
| 39               | 1                | 0              | -3.553834               | 1.658642  | -0.831513 |
| 40               | 6                | 0              | -5.904915               | -0.850202 | 0.951629  |
| 41               | 1                | 0              | -4.360698               | -1.927956 | -0.103061 |
| 42               | 1                | 0              | -4.001332               | -1.659124 | 1.612793  |
| 43               | 6                | 0              | -6.465680               | -0.114659 | -0.263346 |
| 44               | 1                | 0              | -5.950426               | 1.627542  | -1.455525 |
| 45               | 1                | 0              | -5.685847               | 1.817812  | 0.277749  |
| 46               | 1                | 0              | -6.464943               | -1.766976 | 1.151602  |
| 47               | 1                | 0              | -5.985017               | -0.212226 | 1.838520  |

|    |   |   |           |           |           |
|----|---|---|-----------|-----------|-----------|
| 48 | 1 | 0 | -7.504848 | 0.177576  | -0.093563 |
| 49 | 1 | 0 | -6.451389 | -0.785159 | -1.130726 |
| 50 | 7 | 0 | -3.650019 | -0.009744 | 0.414466  |
| 51 | 1 | 0 | 1.496874  | 4.217043  | 0.111316  |

### Structure TS<sub>19b/20b</sub> (vacuum)

Energy (Hartrees): = -1112.7703062  
Imaginary frequency -1072.92

Standard orientation:

| Center<br>Number | Atomic<br>Number | Atomic<br>Type | Coordinates (Angstroms) |           |           |
|------------------|------------------|----------------|-------------------------|-----------|-----------|
|                  |                  |                | X                       | Y         | Z         |
| 1                | 6                | 0              | -1.452938               | -1.841367 | 0.062009  |
| 2                | 6                | 0              | -2.585210               | -1.087355 | -0.034226 |
| 3                | 6                | 0              | -2.457157               | 0.359378  | -0.015579 |
| 4                | 6                | 0              | -1.169147               | 0.969651  | 0.040366  |
| 5                | 6                | 0              | 0.015101                | 0.136717  | 0.092187  |
| 6                | 6                | 0              | -0.140909               | -1.258832 | 0.124785  |
| 7                | 6                | 0              | -3.927420               | -1.794836 | -0.139294 |
| 8                | 6                | 0              | -1.129831               | 2.388276  | 0.063709  |
| 9                | 6                | 0              | -2.272469               | 3.152995  | 0.031099  |
| 10               | 6                | 0              | -3.538763               | 2.555111  | -0.018012 |
| 11               | 6                | 0              | -3.609583               | 1.183149  | -0.039964 |
| 12               | 6                | 0              | -4.247102               | -2.579607 | 1.140886  |
| 13               | 6                | 0              | -4.005897               | -2.688864 | -1.386080 |
| 14               | 6                | 0              | -4.773927               | 3.415920  | -0.043755 |
| 15               | 6                | 0              | 1.375326                | 0.600604  | 0.083289  |
| 16               | 1                | 0              | 1.632902                | 1.648491  | 0.014699  |
| 17               | 1                | 0              | -4.591439               | 0.735891  | -0.065578 |
| 18               | 1                | 0              | -4.708732               | -1.047751 | -0.256490 |
| 19               | 1                | 0              | -5.237916               | -3.034638 | 1.061695  |
| 20               | 1                | 0              | -4.241216               | -1.919386 | 2.011142  |
| 21               | 1                | 0              | -3.514621               | -3.371104 | 1.300328  |
| 22               | 1                | 0              | -5.014826               | -3.098291 | -1.482002 |
| 23               | 1                | 0              | -3.783923               | -2.113067 | -2.287341 |
| 24               | 1                | 0              | -3.301712               | -3.517093 | -1.322097 |
| 25               | 8                | 0              | -1.477443               | -3.195610 | 0.089923  |
| 26               | 1                | 0              | -0.547966               | -3.468246 | 0.146290  |
| 27               | 8                | 0              | 0.848790                | -2.100121 | 0.189992  |
| 28               | 1                | 0              | -4.813857               | 4.067891  | 0.832657  |
| 29               | 1                | 0              | -5.677423               | 2.805699  | -0.054086 |
| 30               | 1                | 0              | -4.785678               | 4.054865  | -0.930706 |
| 31               | 8                | 0              | 0.093358                | 3.001287  | 0.126077  |
| 32               | 1                | 0              | -0.042356               | 3.951723  | 0.157123  |
| 33               | 7                | 0              | 2.344546                | -0.259730 | 0.143286  |
| 34               | 6                | 0              | 4.439235                | -0.363650 | 1.169430  |
| 35               | 6                | 0              | 4.235795                | -0.128096 | -1.232453 |
| 36               | 6                | 0              | 5.868237                | 0.166023  | 1.141247  |
| 37               | 1                | 0              | 4.440668                | -1.463520 | 1.080028  |
| 38               | 1                | 0              | 3.942434                | -0.102811 | 2.105134  |
| 39               | 6                | 0              | 5.656649                | 0.411127  | -1.340763 |
| 40               | 1                | 0              | 4.232588                | -1.223956 | -1.359567 |
| 41               | 1                | 0              | 3.594309                | 0.302026  | -2.003605 |
| 42               | 6                | 0              | 6.525140                | -0.131694 | -0.206258 |
| 43               | 1                | 0              | 6.434063                | -0.285280 | 1.959675  |
| 44               | 1                | 0              | 5.844545                | 1.246862  | 1.309997  |
| 45               | 1                | 0              | 6.070703                | 0.138638  | -2.314403 |
| 46               | 1                | 0              | 5.620993                | 1.503619  | -1.288660 |
| 47               | 1                | 0              | 7.527946                | 0.299033  | -0.249759 |
| 48               | 1                | 0              | 6.634159                | -1.216359 | -0.323058 |
| 49               | 7                | 0              | 3.665147                | 0.234133  | 0.074108  |
| 50               | 1                | 0              | 1.855526                | -1.383223 | 0.181366  |
| 51               | 1                | 0              | -2.185464               | 4.236810  | 0.051794  |

### Structure TS<sub>19b/20b</sub> (CHCl<sub>3</sub>)

Energy (Hartrees): = -1112.7970938  
Imaginary frequency -1087.92

Standard orientation:

| Center<br>Number | Atomic<br>Number | Atomic<br>Type | Coordinates (Angstroms) |           |           |
|------------------|------------------|----------------|-------------------------|-----------|-----------|
|                  |                  |                | X                       | Y         | Z         |
| 1                | 6                | 0              | 1.446888                | -1.841616 | 0.001475  |
| 2                | 6                | 0              | 2.586651                | -1.090055 | 0.005544  |
| 3                | 6                | 0              | 2.460538                | 0.356330  | 0.023149  |
| 4                | 6                | 0              | 1.171325                | 0.968736  | 0.067667  |
| 5                | 6                | 0              | -0.015529               | 0.137393  | 0.081175  |
| 6                | 6                | 0              | 0.137450                | -1.256170 | 0.048663  |
| 7                | 6                | 0              | 3.933164                | -1.798118 | -0.031072 |

|    |   |   |           |           |           |
|----|---|---|-----------|-----------|-----------|
| 8  | 6 | 0 | 1.133404  | 2.390901  | 0.091990  |
| 9  | 6 | 0 | 2.277807  | 3.153834  | 0.053458  |
| 10 | 6 | 0 | 3.543971  | 2.552345  | -0.003412 |
| 11 | 6 | 0 | 3.615647  | 1.179546  | -0.013764 |
| 12 | 6 | 0 | 4.135323  | -2.540282 | -1.358925 |
| 13 | 6 | 0 | 4.136479  | -2.727830 | 1.173560  |
| 14 | 6 | 0 | 4.778788  | 3.411053  | -0.059205 |
| 15 | 6 | 0 | -1.381469 | 0.607581  | 0.103250  |
| 16 | 1 | 0 | -1.634184 | 1.659043  | 0.108962  |
| 17 | 1 | 0 | 4.597468  | 0.733508  | -0.063345 |
| 18 | 1 | 0 | 4.721621  | -1.052706 | 0.033606  |
| 19 | 1 | 0 | 5.129542  | -2.994891 | -1.385526 |
| 20 | 1 | 0 | 4.054493  | -1.851942 | -2.204000 |
| 21 | 1 | 0 | 3.393280  | -3.329990 | -1.485000 |
| 22 | 1 | 0 | 5.154569  | -3.126633 | 1.159226  |
| 23 | 1 | 0 | 4.001173  | -2.184106 | 2.112055  |
| 24 | 1 | 0 | 3.440291  | -3.565664 | 1.157808  |
| 25 | 8 | 0 | 1.472495  | -3.196392 | -0.044512 |
| 26 | 1 | 0 | 0.544883  | -3.482930 | -0.029067 |
| 27 | 8 | 0 | -0.859930 | -2.098916 | 0.053875  |
| 28 | 1 | 0 | 4.783884  | 4.028867  | -0.961616 |
| 29 | 1 | 0 | 5.682712  | 2.800380  | -0.060973 |
| 30 | 1 | 0 | 4.825278  | 4.086945  | 0.798933  |
| 31 | 8 | 0 | -0.085488 | 3.000663  | 0.153955  |
| 32 | 1 | 0 | 0.040831  | 3.956696  | 0.162918  |
| 33 | 7 | 0 | -2.347548 | -0.252175 | 0.106117  |
| 34 | 6 | 0 | -4.254285 | -0.043713 | -1.234902 |
| 35 | 6 | 0 | -4.426407 | -0.433006 | 1.152561  |
| 36 | 6 | 0 | -5.682662 | 0.482621  | -1.291364 |
| 37 | 1 | 0 | -4.240008 | -1.129194 | -1.426396 |
| 38 | 1 | 0 | -3.629006 | 0.442336  | -1.986122 |
| 39 | 6 | 0 | -5.860949 | 0.080809  | 1.172899  |
| 40 | 1 | 0 | -4.416472 | -1.523473 | 0.989649  |
| 41 | 1 | 0 | -3.922835 | -0.226386 | 2.098609  |
| 42 | 6 | 0 | -6.530761 | -0.139747 | -0.182799 |
| 43 | 1 | 0 | -6.103637 | 0.264292  | -2.275703 |
| 44 | 1 | 0 | -5.661838 | 1.570824  | -1.173560 |
| 45 | 1 | 0 | -6.409376 | -0.429457 | 1.968383  |
| 46 | 1 | 0 | -5.849670 | 1.149461  | 1.410431  |
| 47 | 1 | 0 | -7.538127 | 0.283267  | -0.186854 |
| 48 | 1 | 0 | -6.628954 | -1.216157 | -0.365619 |
| 49 | 7 | 0 | -3.670593 | 0.244275  | 0.087199  |
| 50 | 1 | 0 | -1.847046 | -1.390784 | 0.077542  |
| 51 | 1 | 0 | 2.189257  | 4.237471  | 0.066231  |

-----

### Structure TS<sub>19b/20b</sub> (DMSO)

Energy (Hartrees): = -1112.7917492  
 Imaginary frequency -1086.84

Standard orientation:

| Center Number | Atomic Number | Atomic Type | Coordinates (Angstroms) |           |           |
|---------------|---------------|-------------|-------------------------|-----------|-----------|
|               |               |             | X                       | Y         | Z         |
| 1             | 6             | 0           | 1.439481                | -1.843330 | 0.057962  |
| 2             | 6             | 0           | 2.574940                | -1.093585 | -0.061480 |
| 3             | 6             | 0           | 2.453566                | 0.352834  | -0.019106 |
| 4             | 6             | 0           | 1.167989                | 0.966981  | 0.086112  |
| 5             | 6             | 0           | -0.017789               | 0.137656  | 0.151782  |
| 6             | 6             | 0           | 0.134823                | -1.255227 | 0.167010  |
| 7             | 6             | 0           | 3.913853                | -1.802231 | -0.204652 |
| 8             | 6             | 0           | 1.134093                | 2.388852  | 0.149973  |
| 9             | 6             | 0           | 2.278919                | 3.149892  | 0.092529  |
| 10            | 6             | 0           | 3.541359                | 2.546654  | -0.019498 |
| 11            | 6             | 0           | 3.610284                | 1.173957  | -0.070203 |
| 12            | 6             | 0           | 3.964463                | -2.695475 | -1.452176 |
| 13            | 6             | 0           | 4.266089                | -2.587531 | 1.065323  |
| 14            | 6             | 0           | 4.775345                | 3.404775  | -0.084281 |
| 15            | 6             | 0           | -1.384447               | 0.610470  | 0.161567  |
| 16            | 1             | 0           | -1.634734               | 1.659995  | 0.083589  |
| 17            | 1             | 0           | 4.591029                | 0.727811  | -0.144536 |
| 18            | 1             | 0           | 4.693468                | -1.056941 | -0.338421 |
| 19            | 1             | 0           | 4.972639                | -3.101488 | -1.571529 |
| 20            | 1             | 0           | 3.724279                | -2.121644 | -2.351163 |
| 21            | 1             | 0           | 3.265630                | -3.528321 | -1.377745 |
| 22            | 1             | 0           | 5.255433                | -3.041480 | 0.960476  |
| 23            | 1             | 0           | 4.287241                | -1.929085 | 1.937797  |
| 24            | 1             | 0           | 3.540963                | -3.381912 | 1.248945  |
| 25            | 8             | 0           | 1.459658                | -3.198695 | 0.070500  |
| 26            | 1             | 0           | 0.531892                | -3.473753 | 0.147634  |
| 27            | 8             | 0           | -0.860515               | -2.096652 | 0.253056  |
| 28            | 1             | 0           | 4.765404                | 4.033449  | -0.979158 |
| 29            | 1             | 0           | 5.678642                | 2.793432  | -0.106641 |
| 30            | 1             | 0           | 4.832829                | 4.072031  | 0.779823  |
| 31            | 8             | 0           | -0.078772               | 2.997318  | 0.280445  |

|    |   |   |           |           |           |
|----|---|---|-----------|-----------|-----------|
| 32 | 1 | 0 | 0.053594  | 3.952711  | 0.322662  |
| 33 | 7 | 0 | -2.347709 | -0.247211 | 0.239276  |
| 34 | 6 | 0 | -4.145055 | 0.138609  | -1.223576 |
| 35 | 6 | 0 | -4.498464 | -0.594154 | 1.062443  |
| 36 | 6 | 0 | -5.572805 | 0.661229  | -1.315937 |
| 37 | 1 | 0 | -4.097897 | -0.908022 | -1.565026 |
| 38 | 1 | 0 | -3.473122 | 0.734040  | -1.844573 |
| 39 | 6 | 0 | -5.936819 | -0.092950 | 1.043330  |
| 40 | 1 | 0 | -4.459655 | -1.648168 | 0.742220  |
| 41 | 1 | 0 | -4.074419 | -0.525664 | 2.065911  |
| 42 | 6 | 0 | -6.495784 | -0.115859 | -0.378310 |
| 43 | 1 | 0 | -5.911211 | 0.582578  | -2.351828 |
| 44 | 1 | 0 | -5.578354 | 1.722364  | -1.045538 |
| 45 | 1 | 0 | -6.538704 | -0.715690 | 1.709396  |
| 46 | 1 | 0 | -5.959662 | 0.929473  | 1.434534  |
| 47 | 1 | 0 | -7.505132 | 0.301613  | -0.401150 |
| 48 | 1 | 0 | -6.563893 | -1.154795 | -0.721273 |
| 49 | 7 | 0 | -3.671563 | 0.233772  | 0.171353  |
| 50 | 1 | 0 | -1.845118 | -1.386462 | 0.262115  |
| 51 | 1 | 0 | 2.196538  | 4.232826  | 0.144195  |

-----

**Structure TS<sub>19a/20a</sub> (vacuum)**

Energy (Hartrees): = -1112.7687782  
 Imaginary frequency -846.49

Standard orientation:

| Center<br>Number | Atomic<br>Number | Atomic<br>Type | Coordinates (Angstroms) |           |           |
|------------------|------------------|----------------|-------------------------|-----------|-----------|
|                  |                  |                | X                       | Y         | Z         |
| 1                | 6                | 0              | -1.573584               | -1.854502 | -0.018673 |
| 2                | 6                | 0              | -2.651000               | -1.020121 | -0.036454 |
| 3                | 6                | 0              | -2.415011               | 0.412405  | 0.003169  |
| 4                | 6                | 0              | -1.083263               | 0.926721  | 0.005077  |
| 5                | 6                | 0              | 0.036859                | 0.008560  | -0.022901 |
| 6                | 6                | 0              | -0.215779               | -1.374678 | -0.001828 |
| 7                | 6                | 0              | -4.045252               | -1.626254 | -0.083751 |
| 8                | 6                | 0              | -0.944031               | 2.338435  | 0.062365  |
| 9                | 6                | 0              | -2.028047               | 3.183840  | 0.101335  |
| 10               | 6                | 0              | -3.335258               | 2.679412  | 0.098696  |
| 11               | 6                | 0              | -3.503956               | 1.316689  | 0.052595  |
| 12               | 6                | 0              | -4.350272               | -2.428078 | 1.189323  |
| 13               | 6                | 0              | -4.258140               | -2.470228 | -1.348840 |
| 14               | 6                | 0              | -4.505697               | 3.625323  | 0.147705  |
| 15               | 6                | 0              | 1.420635                | 0.390111  | -0.116749 |
| 16               | 1                | 0              | 1.700877                | 1.426930  | -0.203173 |
| 17               | 1                | 0              | -4.515360               | 0.940079  | 0.066223  |
| 18               | 1                | 0              | -4.776358               | -0.822749 | -0.133130 |
| 19               | 1                | 0              | -5.374636               | -2.808461 | 1.155251  |
| 20               | 1                | 0              | -4.247925               | -1.798129 | 2.075977  |
| 21               | 1                | 0              | -3.669881               | -3.274578 | 1.284381  |
| 22               | 1                | 0              | -5.296529               | -2.809092 | -1.395397 |
| 23               | 1                | 0              | -4.050700               | -1.880312 | -2.244469 |
| 24               | 1                | 0              | -3.609077               | -3.345012 | -1.352828 |
| 25               | 8                | 0              | -1.691358               | -3.203379 | -0.024573 |
| 26               | 1                | 0              | -0.777445               | -3.533020 | -0.022702 |
| 27               | 8                | 0              | 0.706876                | -2.283069 | 0.001607  |
| 28               | 1                | 0              | -5.449772               | 3.080061  | 0.155320  |
| 29               | 1                | 0              | -4.506274               | 4.291086  | -0.719392 |
| 30               | 1                | 0              | -4.468117               | 4.250818  | 1.043455  |
| 31               | 8                | 0              | 0.322448                | 2.870832  | 0.086497  |
| 32               | 1                | 0              | 0.245820                | 3.825071  | 0.165222  |
| 33               | 7                | 0              | 2.332392                | -0.537176 | -0.125761 |
| 34               | 6                | 0              | 4.115325                | 1.038570  | -0.401192 |
| 35               | 6                | 0              | 4.425554                | -1.126146 | 0.685037  |
| 36               | 6                | 0              | 5.605312                | 1.105760  | -0.722973 |
| 37               | 1                | 0              | 3.902805                | 1.564149  | 0.547379  |
| 38               | 1                | 0              | 3.546764                | 1.529674  | -1.194104 |
| 39               | 6                | 0              | 5.915801                | -1.114559 | 0.376429  |
| 40               | 1                | 0              | 4.239073                | -0.703209 | 1.686263  |
| 41               | 1                | 0              | 4.029076                | -2.142938 | 0.671478  |
| 42               | 6                | 0              | 6.428016                | 0.322491  | 0.298107  |
| 43               | 1                | 0              | 5.911974                | 2.153838  | -0.752461 |
| 44               | 1                | 0              | 5.763161                | 0.685965  | -1.720911 |
| 45               | 1                | 0              | 6.444292                | -1.677983 | 1.148604  |
| 46               | 1                | 0              | 6.082821                | -1.620391 | -0.579259 |
| 47               | 1                | 0              | 7.487043                | 0.342377  | 0.032246  |
| 48               | 1                | 0              | 6.331766                | 0.795390  | 1.282619  |
| 49               | 7                | 0              | 3.691438                | -0.353310 | -0.326294 |
| 50               | 1                | 0              | 1.818714                | -1.571579 | -0.081563 |
| 51               | 1                | 0              | -1.861918               | 4.257836  | 0.142252  |

-----

**Structure TS<sub>19a/20a</sub> (CHCl<sub>3</sub>)**

Energy (Hartrees): = -1112.7972018  
 Imaginary frequency -899.52

Standard orientation:

| Center<br>Number | Atomic<br>Number | Atomic<br>Type | Coordinates (Angstroms) |           |           |
|------------------|------------------|----------------|-------------------------|-----------|-----------|
|                  |                  |                | X                       | Y         | Z         |
| 1                | 6                | 0              | 1.558181                | -1.852925 | -0.019774 |
| 2                | 6                | 0              | 2.642670                | -1.028646 | 0.064204  |
| 3                | 6                | 0              | 2.418827                | 0.404253  | 0.022451  |
| 4                | 6                | 0              | 1.089742                | 0.927542  | 0.006391  |
| 5                | 6                | 0              | -0.036848               | 0.018532  | 0.013830  |
| 6                | 6                | 0              | 0.207621                | -1.360659 | -0.049141 |
| 7                | 6                | 0              | 4.033477                | -1.638565 | 0.162216  |
| 8                | 6                | 0              | 0.957172                | 2.342975  | -0.067273 |
| 9                | 6                | 0              | 2.048130                | 3.180299  | -0.100546 |
| 10               | 6                | 0              | 3.353788                | 2.665213  | -0.085510 |
| 11               | 6                | 0              | 3.516881                | 1.301601  | -0.027133 |
| 12               | 6                | 0              | 4.426849                | -2.339670 | -1.144664 |
| 13               | 6                | 0              | 4.179658                | -2.576378 | 1.369091  |
| 14               | 6                | 0              | 4.528054                | 3.604756  | -0.151383 |
| 15               | 6                | 0              | -1.425537               | 0.409971  | 0.139783  |
| 16               | 1                | 0              | -1.697516               | 1.441261  | 0.294154  |
| 17               | 1                | 0              | 4.526622                | 0.918881  | -0.043559 |
| 18               | 1                | 0              | 4.752867                | -0.839263 | 0.325266  |
| 19               | 1                | 0              | 5.446074                | -2.729851 | -1.072220 |
| 20               | 1                | 0              | 4.387963                | -1.643933 | -1.986848 |
| 21               | 1                | 0              | 3.754551                | -3.173181 | -1.355574 |
| 22               | 1                | 0              | 5.225730                | -2.878169 | 1.471983  |
| 23               | 1                | 0              | 3.882485                | -2.071690 | 2.291878  |
| 24               | 1                | 0              | 3.574417                | -3.475193 | 1.257814  |
| 25               | 8                | 0              | 1.671581                | -3.203000 | -0.057943 |
| 26               | 1                | 0              | 0.759588                | -3.538252 | -0.086673 |
| 27               | 8                | 0              | -0.728438               | -2.265488 | -0.092361 |
| 28               | 1                | 0              | 5.471673                | 3.060482  | -0.094534 |
| 29               | 1                | 0              | 4.500345                | 4.325300  | 0.670613  |
| 30               | 1                | 0              | 4.520047                | 4.175350  | -1.084306 |
| 31               | 8                | 0              | -0.302787               | 2.871456  | -0.120169 |
| 32               | 1                | 0              | -0.235900               | 3.829287  | -0.210594 |
| 33               | 7                | 0              | -2.334820               | -0.513175 | 0.103775  |
| 34               | 6                | 0              | -4.123368               | 1.049358  | 0.414726  |
| 35               | 6                | 0              | -4.430249               | -1.123587 | -0.676587 |
| 36               | 6                | 0              | -5.612217               | 1.104285  | 0.741188  |
| 37               | 1                | 0              | -3.913636               | 1.578242  | -0.531149 |
| 38               | 1                | 0              | -3.558786               | 1.539326  | 1.210804  |
| 39               | 6                | 0              | -5.917129               | -1.116601 | -0.356291 |
| 40               | 1                | 0              | -4.254400               | -0.700465 | -1.678253 |
| 41               | 1                | 0              | -4.030272               | -2.139110 | -0.662476 |
| 42               | 6                | 0              | -6.435237               | 0.317836  | -0.276339 |
| 43               | 1                | 0              | -5.921674               | 2.151471  | 0.771970  |
| 44               | 1                | 0              | -5.765896               | 0.684424  | 1.740163  |
| 45               | 1                | 0              | -6.445089               | -1.683052 | -1.126881 |
| 46               | 1                | 0              | -6.078403               | -1.623489 | 0.600422  |
| 47               | 1                | 0              | -7.492959               | 0.331497  | -0.003679 |
| 48               | 1                | 0              | -6.344818               | 0.790955  | -1.261339 |
| 49               | 7                | 0              | -3.686902               | -0.341608 | 0.325617  |
| 50               | 1                | 0              | -1.804026               | -1.562681 | 0.002234  |
| 51               | 1                | 0              | 1.887435                | 4.254049  | -0.156619 |

**Structure TS<sub>19a/20a</sub> (DMSO)**

Energy (Hartrees): = -1112.792892  
 Imaginary frequency -938.04

Standard orientation:

| Center<br>Number | Atomic<br>Number | Atomic<br>Type | Coordinates (Angstroms) |           |           |
|------------------|------------------|----------------|-------------------------|-----------|-----------|
|                  |                  |                | X                       | Y         | Z         |
| 1                | 6                | 0              | 1.558854                | -1.852382 | 0.017081  |
| 2                | 6                | 0              | 2.647539                | -1.027911 | 0.035163  |
| 3                | 6                | 0              | 2.422317                | 0.405018  | 0.003711  |
| 4                | 6                | 0              | 1.091369                | 0.927249  | -0.023056 |
| 5                | 6                | 0              | -0.035970               | 0.019573  | 0.001730  |
| 6                | 6                | 0              | 0.209089                | -1.359925 | -0.009348 |
| 7                | 6                | 0              | 4.038819                | -1.643589 | 0.069872  |
| 8                | 6                | 0              | 0.958137                | 2.343495  | -0.108700 |
| 9                | 6                | 0              | 2.047716                | 3.183040  | -0.119055 |
| 10               | 6                | 0              | 3.353759                | 2.670120  | -0.061499 |
| 11               | 6                | 0              | 3.519719                | 1.306429  | -0.007361 |
| 12               | 6                | 0              | 4.323839                | -2.468985 | -1.191855 |
| 13               | 6                | 0              | 4.268386                | -2.465804 | 1.344778  |
| 14               | 6                | 0              | 4.525716                | 3.613372  | -0.076028 |
| 15               | 6                | 0              | -1.428775               | 0.415340  | 0.108957  |

|    |   |   |           |           |           |
|----|---|---|-----------|-----------|-----------|
| 16 | 1 | 0 | -1.705592 | 1.450514  | 0.222550  |
| 17 | 1 | 0 | 4.531462  | 0.929936  | 0.022401  |
| 18 | 1 | 0 | 4.776085  | -0.845261 | 0.086743  |
| 19 | 1 | 0 | 5.353650  | -2.836349 | -1.170411 |
| 20 | 1 | 0 | 4.202123  | -1.859258 | -2.091148 |
| 21 | 1 | 0 | 3.654551  | -3.327477 | -1.263306 |
| 22 | 1 | 0 | 5.302132  | -2.821286 | 1.374381  |
| 23 | 1 | 0 | 4.095501  | -1.857026 | 2.236192  |
| 24 | 1 | 0 | 3.606934  | -3.332093 | 1.384787  |
| 25 | 8 | 0 | 1.667166  | -3.203549 | 0.029962  |
| 26 | 1 | 0 | 0.751960  | -3.530737 | 0.023849  |
| 27 | 8 | 0 | -0.727157 | -2.267628 | -0.014564 |
| 28 | 1 | 0 | 5.468968  | 3.070582  | -0.000979 |
| 29 | 1 | 0 | 4.469225  | 4.320675  | 0.755836  |
| 30 | 1 | 0 | 4.541522  | 4.200790  | -0.998428 |
| 31 | 8 | 0 | -0.299024 | 2.867325  | -0.195526 |
| 32 | 1 | 0 | -0.232326 | 3.827657  | -0.268923 |
| 33 | 7 | 0 | -2.334019 | -0.511165 | 0.107092  |
| 34 | 6 | 0 | -4.121127 | 1.061314  | 0.386534  |
| 35 | 6 | 0 | -4.434193 | -1.140026 | -0.651008 |
| 36 | 6 | 0 | -5.607285 | 1.121108  | 0.723000  |
| 37 | 1 | 0 | -3.920529 | 1.565958  | -0.573619 |
| 38 | 1 | 0 | -3.550287 | 1.570403  | 1.166045  |
| 39 | 6 | 0 | -5.918215 | -1.125404 | -0.319140 |
| 40 | 1 | 0 | -4.266938 | -0.738520 | -1.662550 |
| 41 | 1 | 0 | -4.034410 | -2.155149 | -0.614848 |
| 42 | 6 | 0 | -6.436718 | 0.309851  | -0.269044 |
| 43 | 1 | 0 | -5.916548 | 2.168694  | 0.730102  |
| 44 | 1 | 0 | -5.754270 | 0.726048  | 1.733294  |
| 45 | 1 | 0 | -6.450766 | -1.710271 | -1.072536 |
| 46 | 1 | 0 | -6.072281 | -1.610214 | 0.650408  |
| 47 | 1 | 0 | -7.492336 | 0.328666  | 0.011491  |
| 48 | 1 | 0 | -6.353205 | 0.759689  | -1.265296 |
| 49 | 7 | 0 | -3.683692 | -0.332355 | 0.326421  |
| 50 | 1 | 0 | -1.793660 | -1.568388 | 0.045155  |
| 51 | 1 | 0 | 1.887268  | 4.256579  | -0.183153 |

-----

### Structure TS<sub>21b/22b</sub> (vacuum)

Energy (Hartrees): = -1191.3861697  
Imaginary frequency -1092.67

Standard orientation:

| Center<br>Number | Atomic<br>Number | Atomic<br>Type | Coordinates (Angstroms) |           |           |
|------------------|------------------|----------------|-------------------------|-----------|-----------|
|                  |                  |                | X                       | Y         | Z         |
| 1                | 6                | 0              | 4.246481                | -2.840974 | 1.162346  |
| 2                | 6                | 0              | 5.024770                | 3.421278  | 0.297195  |
| 3                | 6                | 0              | -1.099330               | 0.568047  | 0.043326  |
| 4                | 6                | 0              | 2.525039                | 3.144813  | 0.215365  |
| 5                | 6                | 0              | 3.796319                | 2.554061  | 0.219837  |
| 6                | 6                | 0              | 3.878895                | 1.184844  | 0.141147  |
| 7                | 6                | 0              | 2.732273                | 0.356546  | 0.059172  |
| 8                | 6                | 0              | 1.440693                | 0.959470  | 0.052733  |
| 9                | 6                | 0              | 1.388638                | 2.375803  | 0.124830  |
| 10               | 6                | 0              | 4.214334                | -1.788727 | 0.043942  |
| 11               | 6                | 0              | 4.615232                | -2.387750 | -1.310932 |
| 12               | 6                | 0              | 2.869494                | -1.085184 | -0.043004 |
| 13               | 6                | 0              | 1.746703                | -1.831288 | -0.252112 |
| 14               | 6                | 0              | 0.431476                | -1.253882 | -0.268142 |
| 15               | 6                | 0              | 0.264009                | 0.126192  | -0.075706 |
| 16               | 1                | 0              | -1.361795               | 1.582395  | 0.312200  |
| 17               | 1                | 0              | 4.864456                | 0.744716  | 0.118615  |
| 18               | 1                | 0              | 0.860718                | -3.449769 | -0.521218 |
| 19               | 1                | 0              | 5.260570                | -3.236501 | 1.262085  |
| 20               | 8                | 0              | 0.159525                | 2.978718  | 0.088515  |
| 21               | 1                | 0              | 5.932363                | 2.817109  | 0.295644  |
| 22               | 1                | 0              | 5.020260                | 4.024788  | 1.208542  |
| 23               | 1                | 0              | 5.072040                | 4.107748  | -0.552183 |
| 24               | 8                | 0              | -0.554487               | -2.090688 | -0.426497 |
| 25               | 1                | 0              | 3.959412                | -2.395457 | 2.117473  |
| 26               | 1                | 0              | 3.571972                | -3.668966 | 0.950174  |
| 27               | 8                | 0              | 1.785891                | -3.174080 | -0.426884 |
| 28               | 1                | 0              | 4.972377                | -1.054753 | 0.308496  |
| 29               | 1                | 0              | 5.602436                | -2.851705 | -1.238622 |
| 30               | 1                | 0              | 4.655352                | -1.612639 | -2.079820 |
| 31               | 1                | 0              | 3.898284                | -3.148191 | -1.622522 |
| 32               | 1                | 0              | -1.556783               | -1.387070 | -0.349036 |
| 33               | 1                | 0              | 0.285828                | 3.930972  | 0.095400  |
| 34               | 7                | 0              | -2.061690               | -0.279627 | -0.144137 |
| 35               | 7                | 0              | -3.385356               | 0.170922  | 0.064256  |
| 36               | 6                | 0              | -4.119505               | 0.095620  | -1.220584 |
| 37               | 6                | 0              | -3.999151               | -0.683475 | 1.107907  |
| 38               | 6                | 0              | -5.546390               | 0.591050  | -0.995364 |



|    |   |   |           |           |           |
|----|---|---|-----------|-----------|-----------|
| 39 | 1 | 0 | -4.154942 | -0.956497 | -1.553754 |
| 40 | 6 | 0 | -5.422455 | -0.195207 | 1.365775  |
| 41 | 1 | 0 | -4.041941 | -1.723951 | 0.739475  |
| 42 | 6 | 0 | -6.257549 | -0.208567 | 0.090424  |
| 43 | 1 | 0 | -6.089300 | 0.531299  | -1.942337 |
| 44 | 1 | 0 | -5.498090 | 1.647785  | -0.709059 |
| 45 | 1 | 0 | -5.874650 | -0.827278 | 2.134561  |
| 46 | 1 | 0 | -5.366074 | 0.823327  | 1.766004  |
| 47 | 1 | 0 | -7.254493 | 0.197679  | 0.276925  |
| 48 | 1 | 0 | -6.389169 | -1.243027 | -0.246941 |
| 49 | 6 | 0 | -3.167698 | -0.639023 | 2.383634  |
| 50 | 1 | 0 | -2.193522 | -1.110586 | 2.251614  |
| 51 | 1 | 0 | -3.013291 | 0.399620  | 2.688521  |
| 52 | 1 | 0 | -3.693411 | -1.162451 | 3.184550  |
| 53 | 6 | 0 | -3.419163 | 0.934793  | -2.281396 |
| 54 | 1 | 0 | -3.285067 | 1.956680  | -1.915855 |
| 55 | 1 | 0 | -2.441840 | 0.530301  | -2.543830 |
| 56 | 1 | 0 | -4.029029 | 0.966146  | -3.186492 |
| 57 | 1 | 0 | 2.430541  | 4.226978  | 0.267131  |

-----

### Structure TS<sub>21b/22b</sub> (CHCl<sub>3</sub>)

Energy (Hartrees): = -1191.4134583

Imaginary frequency -1071.44

Standard orientation:

| Center<br>Number | Atomic<br>Number | Atomic<br>Type | Coordinates (Angstroms) |           |           |
|------------------|------------------|----------------|-------------------------|-----------|-----------|
|                  |                  |                | X                       | Y         | Z         |
| 1                | 6                | 0              | 4.285662                | -2.740907 | 1.242834  |
| 2                | 6                | 0              | 5.038193                | 3.417513  | 0.249052  |
| 3                | 6                | 0              | -1.102132               | 0.586855  | 0.015637  |
| 4                | 6                | 0              | 2.538660                | 3.150661  | 0.135438  |
| 5                | 6                | 0              | 3.808602                | 2.553922  | 0.161256  |
| 6                | 6                | 0              | 3.889069                | 1.182881  | 0.100868  |
| 7                | 6                | 0              | 2.738599                | 0.355856  | 0.025750  |
| 8                | 6                | 0              | 1.446876                | 0.963395  | 0.008157  |
| 9                | 6                | 0              | 1.399218                | 2.384558  | 0.050432  |
| 10               | 6                | 0              | 4.215604                | -1.796378 | 0.033992  |
| 11               | 6                | 0              | 4.553831                | -2.525265 | -1.273543 |
| 12               | 6                | 0              | 2.871142                | -1.087922 | -0.047109 |
| 13               | 6                | 0              | 1.739193                | -1.837110 | -0.198631 |
| 14               | 6                | 0              | 0.428226                | -1.254757 | -0.219355 |
| 15               | 6                | 0              | 0.266229                | 0.130333  | -0.083123 |
| 16               | 1                | 0              | -1.355009               | 1.617564  | 0.225626  |
| 17               | 1                | 0              | 4.874382                | 0.741604  | 0.100608  |
| 18               | 1                | 0              | 0.850073                | -3.476930 | -0.377817 |
| 19               | 1                | 0              | 5.292050                | -3.160370 | 1.326508  |
| 20               | 8                | 0              | 0.176380                | 2.986894  | -0.007326 |
| 21               | 1                | 0              | 5.945870                | 2.812496  | 0.237975  |
| 22               | 1                | 0              | 5.034547                | 4.007873  | 1.169534  |
| 23               | 1                | 0              | 5.084894                | 4.119220  | -0.588177 |
| 24               | 8                | 0              | -0.566189               | -2.095938 | -0.334118 |
| 25               | 1                | 0              | 4.066932                | -2.202069 | 2.168269  |
| 26               | 1                | 0              | 3.577489                | -3.563840 | 1.147062  |
| 27               | 8                | 0              | 1.774436                | -3.187965 | -0.311146 |
| 28               | 1                | 0              | 4.994142                | -1.053251 | 0.187444  |
| 29               | 1                | 0              | 5.553365                | -2.963896 | -1.206893 |
| 30               | 1                | 0              | 4.543398                | -1.832585 | -2.118905 |
| 31               | 1                | 0              | 3.840328                | -3.325321 | -1.473611 |
| 32               | 1                | 0              | -1.548766               | -1.396628 | -0.274392 |
| 33               | 1                | 0              | 0.295735                | 3.943784  | 0.004700  |
| 34               | 7                | 0              | -2.062979               | -0.266549 | -0.119053 |
| 35               | 7                | 0              | -3.389437               | 0.196713  | 0.048013  |
| 36               | 6                | 0              | -4.123699               | -0.035190 | -1.221781 |
| 37               | 6                | 0              | -3.992923               | -0.553684 | 1.178749  |
| 38               | 6                | 0              | -5.557972               | 0.460431  | -1.052698 |
| 39               | 1                | 0              | -4.141685               | -1.118766 | -1.429323 |
| 40               | 6                | 0              | -5.423312               | -0.061746 | 1.382422  |
| 41               | 1                | 0              | -4.018453               | -1.625810 | 0.918998  |
| 42               | 6                | 0              | -6.257832               | -0.223075 | 0.116727  |
| 43               | 1                | 0              | -6.096599               | 0.281956  | -1.987224 |
| 44               | 1                | 0              | -5.529462               | 1.543971  | -0.889420 |
| 45               | 1                | 0              | -5.865939               | -0.617057 | 2.213641  |
| 46               | 1                | 0              | -5.385763               | 0.994288  | 1.674017  |
| 47               | 1                | 0              | -7.258507               | 0.191716  | 0.260408  |
| 48               | 1                | 0              | -6.378393               | -1.289593 | -0.104925 |
| 49               | 6                | 0              | -3.166007               | -0.365299 | 2.443379  |
| 50               | 1                | 0              | -2.181608               | -0.828989 | 2.362522  |
| 51               | 1                | 0              | -3.032123               | 0.700409  | 2.651227  |
| 52               | 1                | 0              | -3.683787               | -0.820930 | 3.290313  |
| 53               | 6                | 0              | -3.433238               | 0.685001  | -2.372012 |
| 54               | 1                | 0              | -3.301440               | 1.743419  | -2.129012 |
| 55               | 1                | 0              | -2.455031               | 0.257253  | -2.595720 |
| 56               | 1                | 0              | -4.047221               | 0.611697  | -3.272469 |

57 1 0 2.444543 4.233273 0.168390

-----  
**Structure TS<sub>21b/22b</sub> (DMSO)**

Energy (Hartrees): = -1191.407273  
Imaginary frequency -1108.93

Standard orientation:

-----

| Center<br>Number | Atomic<br>Number | Atomic<br>Type | Coordinates (Angstroms) |           |           |
|------------------|------------------|----------------|-------------------------|-----------|-----------|
|                  |                  |                | X                       | Y         | Z         |
| 1                | 6                | 0              | -4.532015               | -2.515886 | -1.298017 |
| 2                | 6                | 0              | -5.034578               | 3.421252  | 0.225307  |
| 3                | 6                | 0              | 1.105409                | 0.582257  | 0.030441  |
| 4                | 6                | 0              | -2.536293               | 3.151467  | 0.110483  |
| 5                | 6                | 0              | -3.807085               | 2.555322  | 0.142571  |
| 6                | 6                | 0              | -3.889697               | 1.183535  | 0.095803  |
| 7                | 6                | 0              | -2.738737               | 0.355072  | 0.030155  |
| 8                | 6                | 0              | -1.445061               | 0.960838  | 0.014869  |
| 9                | 6                | 0              | -1.396831               | 2.383989  | 0.038410  |
| 10               | 6                | 0              | -4.222693               | -1.791525 | 0.018665  |
| 11               | 6                | 0              | -4.328387               | -2.736881 | 1.223261  |
| 12               | 6                | 0              | -2.873873               | -1.088996 | -0.032923 |
| 13               | 6                | 0              | -1.740754               | -1.841954 | -0.156520 |
| 14               | 6                | 0              | -0.428692               | -1.262342 | -0.165263 |
| 15               | 6                | 0              | -0.265176               | 0.124443  | -0.055207 |
| 16               | 1                | 0              | 1.360407                | 1.619605  | 0.198426  |
| 17               | 1                | 0              | -4.875818               | 0.743553  | 0.101893  |
| 18               | 1                | 0              | -0.846786               | -3.476564 | -0.311464 |
| 19               | 1                | 0              | -5.537138               | -2.944408 | -1.258323 |
| 20               | 8                | 0              | -0.175488               | 2.986149  | -0.023550 |
| 21               | 1                | 0              | -5.062800               | 4.138700  | -0.599030 |
| 22               | 1                | 0              | -5.041614               | 3.996325  | 1.155408  |
| 23               | 1                | 0              | -5.943806               | 2.819700  | 0.189391  |
| 24               | 8                | 0              | 0.564658                | -2.108931 | -0.255544 |
| 25               | 1                | 0              | -4.494580               | -1.821161 | -2.141182 |
| 26               | 1                | 0              | -3.821387               | -3.322469 | -1.482834 |
| 27               | 8                | 0              | -1.773651               | -3.193474 | -0.257794 |
| 28               | 1                | 0              | -5.002627               | -1.046717 | 0.153111  |
| 29               | 1                | 0              | -5.337535               | -3.154621 | 1.274483  |
| 30               | 1                | 0              | -4.139860               | -2.199099 | 2.156141  |
| 31               | 1                | 0              | -3.618146               | -3.560513 | 1.149977  |
| 32               | 1                | 0              | 1.542934                | -1.414893 | -0.203226 |
| 33               | 1                | 0              | -0.298184               | 3.943839  | -0.019371 |
| 34               | 7                | 0              | 2.063068                | -0.276487 | -0.074519 |
| 35               | 7                | 0              | 3.391188                | 0.196966  | 0.048972  |
| 36               | 6                | 0              | 4.023118                | -0.514253 | 1.190181  |
| 37               | 6                | 0              | 4.095719                | -0.076889 | -1.230568 |
| 38               | 6                | 0              | 5.457700                | -0.014832 | 1.341089  |
| 39               | 1                | 0              | 4.043096                | -1.594074 | 0.967041  |
| 40               | 6                | 0              | 5.531719                | 0.427565  | -1.112083 |
| 41               | 1                | 0              | 4.112282                | -1.166440 | -1.399447 |
| 42               | 6                | 0              | 6.260234                | -0.217736 | 0.061157  |
| 43               | 1                | 0              | 5.920127                | -0.542618 | 2.179168  |
| 44               | 1                | 0              | 5.426655                | 1.050413  | 1.598365  |
| 45               | 1                | 0              | 6.048209                | 0.220803  | -2.052971 |
| 46               | 1                | 0              | 5.504752                | 1.515873  | -0.982569 |
| 47               | 1                | 0              | 7.264064                | 0.200752  | 0.166810  |
| 48               | 1                | 0              | 6.374005                | -1.290978 | -0.128859 |
| 49               | 6                | 0              | 3.377369                | 0.602832  | -2.388247 |
| 50               | 1                | 0              | 2.396162                | 0.165447  | -2.578379 |
| 51               | 1                | 0              | 3.247672                | 1.668961  | -2.178706 |
| 52               | 1                | 0              | 3.973745                | 0.500429  | -3.297481 |
| 53               | 6                | 0              | 3.227989                | -0.278293 | 2.466971  |
| 54               | 1                | 0              | 3.101226                | 0.794603  | 2.640482  |
| 55               | 1                | 0              | 2.241122                | -0.742236 | 2.428162  |
| 56               | 1                | 0              | 3.767376                | -0.703971 | 3.315889  |
| 57               | 1                | 0              | -2.443781               | 4.234545  | 0.129829  |

-----

**Structure TS<sub>21a/22d</sub> (vacuum)**

Energy (Hartrees): = -1191.3807627  
Imaginary frequency -984.98

Standard orientation:

-----

| Center<br>Number | Atomic<br>Number | Atomic<br>Type | Coordinates (Angstroms) |           |           |
|------------------|------------------|----------------|-------------------------|-----------|-----------|
|                  |                  |                | X                       | Y         | Z         |
| 1                | 6                | 0              | 1.864551                | -1.822324 | 0.279122  |
| 2                | 6                | 0              | 2.927190                | -1.006543 | 0.017711  |
| 3                | 6                | 0              | 2.683283                | 0.415927  | -0.126463 |
| 4                | 6                | 0              | 1.351374                | 0.927407  | -0.093368 |

-----

|    |   |   |           |           |           |
|----|---|---|-----------|-----------|-----------|
| 5  | 6 | 0 | 0.243561  | 0.015046  | 0.079158  |
| 6  | 6 | 0 | 0.512611  | -1.341902 | 0.295757  |
| 7  | 6 | 0 | 4.318422  | -1.614473 | -0.063954 |
| 8  | 6 | 0 | 1.201396  | 2.337057  | -0.178568 |
| 9  | 6 | 0 | 2.276376  | 3.180417  | -0.325532 |
| 10 | 6 | 0 | 3.585193  | 2.677908  | -0.373861 |
| 11 | 6 | 0 | 3.765003  | 1.320365  | -0.270725 |
| 12 | 6 | 0 | 4.410767  | -2.716842 | -1.129707 |
| 13 | 6 | 0 | 4.779320  | -2.116798 | 1.311192  |
| 14 | 6 | 0 | 4.745743  | 3.625513  | -0.522941 |
| 15 | 6 | 0 | -1.153386 | 0.373266  | 0.021071  |
| 16 | 1 | 0 | -1.448325 | 1.377921  | -0.236499 |
| 17 | 1 | 0 | 4.778670  | 0.948738  | -0.280083 |
| 18 | 1 | 0 | 5.017425  | -0.842200 | -0.377554 |
| 19 | 1 | 0 | 5.450239  | -3.039399 | -1.231592 |
| 20 | 1 | 0 | 4.073017  | -2.344125 | -2.099316 |
| 21 | 1 | 0 | 3.805574  | -3.581432 | -0.861544 |
| 22 | 1 | 0 | 5.796713  | -2.511496 | 1.247304  |
| 23 | 1 | 0 | 4.770312  | -1.304583 | 2.041827  |
| 24 | 1 | 0 | 4.121691  | -2.910895 | 1.667274  |
| 25 | 8 | 0 | 2.002887  | -3.150480 | 0.506025  |
| 26 | 1 | 0 | 1.101447  | -3.484099 | 0.638489  |
| 27 | 8 | 0 | -0.411466 | -2.240674 | 0.502374  |
| 28 | 1 | 0 | 4.763794  | 4.353413  | 0.292320  |
| 29 | 1 | 0 | 4.677124  | 4.182595  | -1.461010 |
| 30 | 1 | 0 | 5.694010  | 3.087684  | -0.517954 |
| 31 | 8 | 0 | -0.064807 | 2.862981  | -0.091895 |
| 32 | 1 | 0 | 0.003221  | 3.821134  | -0.109237 |
| 33 | 7 | 0 | -2.043081 | -0.531036 | 0.286026  |
| 34 | 6 | 0 | -3.832676 | 1.089865  | 0.476025  |
| 35 | 6 | 0 | -4.012676 | -0.985107 | -0.890890 |
| 36 | 6 | 0 | -5.360343 | 1.144281  | 0.554244  |
| 37 | 1 | 0 | -3.520932 | 1.702899  | -0.388787 |
| 38 | 6 | 0 | -5.534282 | -0.920659 | -0.811187 |
| 39 | 1 | 0 | -3.679865 | -0.446046 | -1.796821 |
| 40 | 6 | 0 | -6.025082 | 0.512677  | -0.660849 |
| 41 | 1 | 0 | -5.657763 | 2.190483  | 0.661622  |
| 42 | 1 | 0 | -5.672491 | 0.617624  | 1.462973  |
| 43 | 1 | 0 | -5.947470 | -1.385291 | -1.710092 |
| 44 | 1 | 0 | -5.857695 | -1.517932 | 0.048777  |
| 45 | 1 | 0 | -7.112598 | 0.542019  | -0.561357 |
| 46 | 1 | 0 | -5.767625 | 1.085225  | -1.559605 |
| 47 | 7 | 0 | -3.425285 | -0.314445 | 0.293228  |
| 48 | 1 | 0 | -1.452259 | -1.582593 | 0.494506  |
| 49 | 6 | 0 | -3.247956 | 1.661271  | 1.769550  |
| 50 | 1 | 0 | -3.414104 | 0.947542  | 2.579441  |
| 51 | 1 | 0 | -2.182243 | 1.879715  | 1.717599  |
| 52 | 1 | 0 | -3.765539 | 2.590411  | 2.015505  |
| 53 | 6 | 0 | -3.546068 | -2.435361 | -0.972471 |
| 54 | 1 | 0 | -2.480645 | -2.524197 | -1.181688 |
| 55 | 1 | 0 | -3.755437 | -2.942526 | -0.026850 |
| 56 | 1 | 0 | -4.092460 | -2.945503 | -1.767934 |
| 57 | 1 | 0 | 2.105949  | 4.252712  | -0.386410 |

-----

### Structure TS<sub>21a/22d</sub> (CHCl<sub>3</sub>)

Energy (Hartrees): = -1191.4083433  
 Imaginary frequency -987.23

Standard orientation:

| Center Number | Atomic Number | Atomic Type | Coordinates (Angstroms) |           |           |
|---------------|---------------|-------------|-------------------------|-----------|-----------|
|               |               |             | X                       | Y         | Z         |
| 1             | 6             | 0           | 1.863000                | -1.823280 | 0.270905  |
| 2             | 6             | 0           | 2.931481                | -1.006996 | 0.027744  |
| 3             | 6             | 0           | 2.688836                | 0.415224  | -0.117866 |
| 4             | 6             | 0           | 1.354789                | 0.927071  | -0.097854 |
| 5             | 6             | 0           | 0.244967                | 0.014242  | 0.064538  |
| 6             | 6             | 0           | 0.513584                | -1.341566 | 0.274505  |
| 7             | 6             | 0           | 4.324341                | -1.615327 | -0.042487 |
| 8             | 6             | 0           | 1.204493                | 2.339950  | -0.193248 |
| 9             | 6             | 0           | 2.282436                | 3.182063  | -0.331250 |
| 10            | 6             | 0           | 3.592762                | 2.678036  | -0.363875 |
| 11            | 6             | 0           | 3.773751                | 1.320279  | -0.256222 |
| 12            | 6             | 0           | 4.432350                | -2.701495 | -1.122862 |
| 13            | 6             | 0           | 4.773177                | -2.138618 | 1.328143  |
| 14            | 6             | 0           | 4.753227                | 3.626271  | -0.506563 |
| 15            | 6             | 0           | -1.158605               | 0.378712  | 0.012537  |
| 16            | 1             | 0           | -1.452501               | 1.387469  | -0.228653 |
| 17            | 1             | 0           | 4.788552                | 0.950906  | -0.260729 |
| 18            | 1             | 0           | 5.027798                | -0.839001 | -0.333232 |
| 19            | 1             | 0           | 5.475155                | -3.015121 | -1.223078 |
| 20            | 1             | 0           | 4.099655                | -2.320357 | -2.091747 |
| 21            | 1             | 0           | 3.833486                | -3.577140 | -0.873864 |
| 22            | 1             | 0           | 5.794566                | -2.524838 | 1.267495  |

|    |   |   |           |           |           |
|----|---|---|-----------|-----------|-----------|
| 23 | 1 | 0 | 4.755228  | -1.340507 | 2.074855  |
| 24 | 1 | 0 | 4.121205  | -2.944810 | 1.668908  |
| 25 | 8 | 0 | 2.003224  | -3.153662 | 0.490976  |
| 26 | 1 | 0 | 1.104325  | -3.501506 | 0.608566  |
| 27 | 8 | 0 | -0.416532 | -2.244587 | 0.470320  |
| 28 | 1 | 0 | 4.745558  | 4.375729  | 0.289606  |
| 29 | 1 | 0 | 4.704258  | 4.161482  | -1.458991 |
| 30 | 1 | 0 | 5.704152  | 3.093654  | -0.464132 |
| 31 | 8 | 0 | -0.057998 | 2.861044  | -0.127046 |
| 32 | 1 | 0 | -0.002662 | 3.823018  | -0.168683 |
| 33 | 7 | 0 | -2.044687 | -0.529526 | 0.261521  |
| 34 | 6 | 0 | -3.833917 | 1.093751  | 0.483424  |
| 35 | 6 | 0 | -4.030061 | -0.984933 | -0.887033 |
| 36 | 6 | 0 | -5.361152 | 1.146662  | 0.572700  |
| 37 | 1 | 0 | -3.525771 | 1.707228  | -0.380159 |
| 38 | 6 | 0 | -5.550158 | -0.918820 | -0.789559 |
| 39 | 1 | 0 | -3.707609 | -0.443875 | -1.793898 |
| 40 | 6 | 0 | -6.036459 | 0.515468  | -0.636238 |
| 41 | 1 | 0 | -5.655308 | 2.193476  | 0.681811  |
| 42 | 1 | 0 | -5.668409 | 0.621022  | 1.484094  |
| 43 | 1 | 0 | -5.971331 | -1.382910 | -1.685026 |
| 44 | 1 | 0 | -5.867619 | -1.514940 | 0.073811  |
| 45 | 1 | 0 | -7.123036 | 0.545238  | -0.525250 |
| 46 | 1 | 0 | -5.786248 | 1.086713  | -1.537892 |
| 47 | 7 | 0 | -3.425492 | -0.312911 | 0.292201  |
| 48 | 1 | 0 | -1.438517 | -1.597120 | 0.455701  |
| 49 | 6 | 0 | -3.245087 | 1.659088  | 1.776776  |
| 50 | 1 | 0 | -3.425393 | 0.955922  | 2.593905  |
| 51 | 1 | 0 | -2.175797 | 1.864072  | 1.732025  |
| 52 | 1 | 0 | -3.748394 | 2.598366  | 2.015459  |
| 53 | 6 | 0 | -3.563596 | -2.433848 | -0.977333 |
| 54 | 1 | 0 | -2.504970 | -2.520930 | -1.222662 |
| 55 | 1 | 0 | -3.742923 | -2.945423 | -0.027165 |
| 56 | 1 | 0 | -4.130930 | -2.946193 | -1.757167 |
| 57 | 1 | 0 | 2.110231  | 4.253469  | -0.397259 |

-----

### Structure TS<sub>21a/22d</sub> (DMSO)

Energy (Hartrees): = -1191.4026218  
 Imaginary frequency -992.33

Standard orientation:

| Center<br>Number | Atomic<br>Number | Atomic<br>Type | Coordinates (Angstroms) |           |           |
|------------------|------------------|----------------|-------------------------|-----------|-----------|
|                  |                  |                | X                       | Y         | Z         |
| 1                | 6                | 0              | 1.860471                | -1.822776 | 0.275544  |
| 2                | 6                | 0              | 2.930569                | -1.010283 | 0.024138  |
| 3                | 6                | 0              | 2.690336                | 0.412286  | -0.121287 |
| 4                | 6                | 0              | 1.357083                | 0.927799  | -0.094366 |
| 5                | 6                | 0              | 0.244774                | 0.018211  | 0.071321  |
| 6                | 6                | 0              | 0.512364                | -1.337391 | 0.279586  |
| 7                | 6                | 0              | 4.322434                | -1.619749 | -0.050842 |
| 8                | 6                | 0              | 1.210599                | 2.342356  | -0.184429 |
| 9                | 6                | 0              | 2.290240                | 3.181657  | -0.328466 |
| 10               | 6                | 0              | 3.599120                | 2.673008  | -0.370207 |
| 11               | 6                | 0              | 3.778045                | 1.314194  | -0.264907 |
| 12               | 6                | 0              | 4.423650                | -2.714558 | -1.122430 |
| 13               | 6                | 0              | 4.778671                | -2.130634 | 1.321439  |
| 14               | 6                | 0              | 4.761549                | 3.617757  | -0.515534 |
| 15               | 6                | 0              | -1.160789               | 0.386012  | 0.019064  |
| 16               | 1                | 0              | -1.454114               | 1.395492  | -0.219965 |
| 17               | 1                | 0              | 4.792403                | 0.943086  | -0.274305 |
| 18               | 1                | 0              | 5.024873                | -0.846892 | -0.352207 |
| 19               | 1                | 0              | 5.464238                | -3.036615 | -1.217642 |
| 20               | 1                | 0              | 4.097706                | -2.337334 | -2.095399 |
| 21               | 1                | 0              | 3.817195                | -3.584190 | -0.870062 |
| 22               | 1                | 0              | 5.800104                | -2.516055 | 1.258418  |
| 23               | 1                | 0              | 4.765355                | -1.325335 | 2.060784  |
| 24               | 1                | 0              | 4.129518                | -2.934277 | 1.674309  |
| 25               | 8                | 0              | 1.995161                | -3.152745 | 0.501363  |
| 26               | 1                | 0              | 1.093527                | -3.491307 | 0.622658  |
| 27               | 8                | 0              | -0.418779               | -2.241145 | 0.475060  |
| 28               | 1                | 0              | 5.710012                | 3.079721  | -0.490121 |
| 29               | 1                | 0              | 4.763522                | 4.358715  | 0.288479  |
| 30               | 1                | 0              | 4.702145                | 4.164971  | -1.460451 |
| 31               | 8                | 0              | -0.047791               | 2.865478  | -0.105151 |
| 32               | 1                | 0              | 0.010472                | 3.828406  | -0.147044 |
| 33               | 7                | 0              | -2.045569               | -0.523750 | 0.263222  |
| 34               | 6                | 0              | -3.838312               | 1.098802  | 0.474100  |
| 35               | 6                | 0              | -4.028390               | -0.991670 | -0.881938 |
| 36               | 6                | 0              | -5.365744               | 1.151823  | 0.553335  |
| 37               | 1                | 0              | -3.523537               | 1.705046  | -0.390960 |
| 38               | 6                | 0              | -5.548378               | -0.924489 | -0.791321 |
| 39               | 1                | 0              | -3.701637               | -0.456189 | -1.789620 |
| 40               | 6                | 0              | -6.034034               | 0.511151  | -0.653865 |

|    |   |   |           |           |           |
|----|---|---|-----------|-----------|-----------|
| 41 | 1 | 0 | -5.658489 | 2.199978  | 0.651752  |
| 42 | 1 | 0 | -5.680246 | 0.634106  | 1.467142  |
| 43 | 1 | 0 | -5.963589 | -1.396685 | -1.685246 |
| 44 | 1 | 0 | -5.871293 | -1.513068 | 0.075580  |
| 45 | 1 | 0 | -7.121214 | 0.542881  | -0.548986 |
| 46 | 1 | 0 | -5.776898 | 1.073893  | -1.558665 |
| 47 | 7 | 0 | -3.426512 | -0.310109 | 0.295471  |
| 48 | 1 | 0 | -1.433098 | -1.597433 | 0.453485  |
| 49 | 6 | 0 | -3.261330 | 1.672291  | 1.768588  |
| 50 | 1 | 0 | -3.469710 | 0.987156  | 2.594689  |
| 51 | 1 | 0 | -2.187847 | 1.857634  | 1.740623  |
| 52 | 1 | 0 | -3.750464 | 2.625008  | 1.982167  |
| 53 | 6 | 0 | -3.563524 | -2.441380 | -0.959700 |
| 54 | 1 | 0 | -2.504807 | -2.531878 | -1.203608 |
| 55 | 1 | 0 | -3.745683 | -2.947433 | -0.006785 |
| 56 | 1 | 0 | -4.130085 | -2.957623 | -1.737424 |
| 57 | 1 | 0 | 2.121062  | 4.254031  | -0.389570 |

### Structure TS<sub>23/24</sub> (vacuum)

Energy (Hartrees): = -1245.0052286  
 Imaginary frequency -984.11

Standard orientation:

| Center<br>Number | Atomic<br>Number | Atomic<br>Type | Coordinates (Angstroms) |           |           |
|------------------|------------------|----------------|-------------------------|-----------|-----------|
|                  |                  |                | X                       | Y         | Z         |
| 1                | 6                | 0              | -1.729191               | -1.861996 | 0.014315  |
| 2                | 6                | 0              | -2.819954               | -1.043639 | -0.006268 |
| 3                | 6                | 0              | -2.609360               | 0.394377  | -0.004851 |
| 4                | 6                | 0              | -1.288449               | 0.933495  | 0.000919  |
| 5                | 6                | 0              | -0.151791               | 0.033519  | 0.010184  |
| 6                | 6                | 0              | -0.387423               | -1.352140 | 0.024686  |
| 7                | 6                | 0              | -4.203674               | -1.674075 | -0.025836 |
| 8                | 6                | 0              | -1.172554               | 2.347712  | 0.004762  |
| 9                | 6                | 0              | -2.272513               | 3.173375  | 0.002369  |
| 10               | 6                | 0              | -3.570004               | 2.645480  | -0.001390 |
| 11               | 6                | 0              | -3.715039               | 1.278967  | -0.004857 |
| 12               | 6                | 0              | -4.471953               | -2.483852 | 1.250803  |
| 13               | 6                | 0              | -4.425225               | -2.516255 | -1.290555 |
| 14               | 6                | 0              | -4.756866               | 3.571699  | -0.000462 |
| 15               | 6                | 0              | 1.230782                | 0.419037  | 0.003984  |
| 16               | 1                | 0              | 1.496727                | 1.467494  | -0.022429 |
| 17               | 1                | 0              | -4.720097               | 0.886365  | -0.003665 |
| 18               | 1                | 0              | -4.949032               | -0.883283 | -0.053197 |
| 19               | 1                | 0              | -5.496159               | -2.865254 | 1.238379  |
| 20               | 1                | 0              | -4.351342               | -1.857632 | 2.137673  |
| 21               | 1                | 0              | -3.789266               | -3.329839 | 1.327195  |
| 22               | 1                | 0              | -5.455898               | -2.879247 | -1.315143 |
| 23               | 1                | 0              | -4.252602               | -1.917788 | -2.187877 |
| 24               | 1                | 0              | -3.756419               | -3.375905 | -1.313185 |
| 25               | 8                | 0              | -1.831184               | -3.212456 | 0.023768  |
| 26               | 1                | 0              | -0.920346               | -3.544567 | 0.036779  |
| 27               | 8                | 0              | 0.559053                | -2.244685 | 0.041727  |
| 28               | 1                | 0              | 1.573674                | -1.578511 | 0.039778  |
| 29               | 1                | 0              | -4.748336               | 4.217980  | -0.881912 |
| 30               | 1                | 0              | -4.748015               | 4.216868  | 0.881787  |
| 31               | 1                | 0              | -5.691820               | 3.011141  | -0.000726 |
| 32               | 8                | 0              | 0.083311                | 2.900011  | 0.012838  |
| 33               | 1                | 0              | -0.004873               | 3.856725  | 0.020481  |
| 34               | 7                | 0              | 2.162060                | -0.490193 | 0.027367  |
| 35               | 1                | 0              | -2.126420               | 4.250877  | 0.005847  |
| 36               | 6                | 0              | 3.583661                | -0.166070 | 0.006086  |
| 37               | 6                | 0              | 3.916960                | 0.557687  | -1.314506 |
| 38               | 1                | 0              | 3.394272                | 1.522710  | -1.344975 |
| 39               | 1                | 0              | 3.549470                | -0.048736 | -2.145331 |
| 40               | 6                | 0              | 3.933813                | 0.705576  | 1.228778  |
| 41               | 1                | 0              | 3.695454                | 0.144699  | 2.140986  |
| 42               | 1                | 0              | 3.321753                | 1.610261  | 1.224070  |
| 43               | 6                | 0              | 4.313317                | -1.519069 | 0.082140  |
| 44               | 1                | 0              | 4.052765                | -2.112003 | -0.803934 |
| 45               | 1                | 0              | 3.956303                | -2.058325 | 0.963012  |
| 46               | 8                | 0              | 5.307590                | 0.731874  | -1.516171 |
| 47               | 1                | 0              | 5.617096                | 1.288354  | -0.789447 |
| 48               | 8                | 0              | 5.282532                | 1.139102  | 1.227056  |
| 49               | 1                | 0              | 5.819880                | 0.337076  | 1.281408  |
| 50               | 8                | 0              | 5.716624                | -1.392296 | 0.220511  |
| 51               | 1                | 0              | 6.028188                | -0.963468 | -0.586796 |

### Structure TS<sub>23/24</sub> (CHCl<sub>3</sub>)

Energy (Hartrees): = -1245.0332153  
 Imaginary frequency -1074.62

Standard orientation:

| Center<br>Number | Atomic<br>Number | Atomic<br>Type | Coordinates (Angstroms) |           |           |
|------------------|------------------|----------------|-------------------------|-----------|-----------|
|                  |                  |                | X                       | Y         | Z         |
| 1                | 6                | 0              | 1.724232                | -1.860115 | -0.018854 |
| 2                | 6                | 0              | 2.819394                | -1.044991 | -0.000132 |
| 3                | 6                | 0              | 2.611562                | 0.392373  | -0.000508 |
| 4                | 6                | 0              | 1.289243                | 0.932579  | -0.011086 |
| 5                | 6                | 0              | 0.150620                | 0.035214  | -0.020300 |
| 6                | 6                | 0              | 0.385868                | -1.347042 | -0.032380 |
| 7                | 6                | 0              | 4.203198                | -1.678379 | 0.021385  |
| 8                | 6                | 0              | 1.173783                | 2.351027  | -0.021483 |
| 9                | 6                | 0              | 2.275461                | 3.174876  | -0.010988 |
| 10               | 6                | 0              | 3.573932                | 2.644217  | 0.005146  |
| 11               | 6                | 0              | 3.720406                | 1.277318  | 0.008148  |
| 12               | 6                | 0              | 4.470580                | -2.506540 | -1.243345 |
| 13               | 6                | 0              | 4.430123                | -2.499545 | 1.298525  |
| 14               | 6                | 0              | 4.760488                | 3.569606  | 0.028765  |
| 15               | 6                | 0              | -1.240404               | 0.425999  | -0.006922 |
| 16               | 1                | 0              | -1.507701               | 1.473733  | 0.028968  |
| 17               | 1                | 0              | 4.726191                | 0.885550  | 0.016791  |
| 18               | 1                | 0              | 4.950272                | -0.889495 | 0.030878  |
| 19               | 1                | 0              | 5.499639                | -2.875886 | -1.232105 |
| 20               | 1                | 0              | 4.339970                | -1.896339 | -2.140653 |
| 21               | 1                | 0              | 3.799763                | -3.363380 | -1.308191 |
| 22               | 1                | 0              | 5.455861                | -2.877722 | 1.317299  |
| 23               | 1                | 0              | 4.281009                | -1.881792 | 2.187657  |
| 24               | 1                | 0              | 3.750208                | -3.350086 | 1.351260  |
| 25               | 8                | 0              | 1.827413                | -3.211832 | -0.022111 |
| 26               | 1                | 0              | 0.918972                | -3.553538 | -0.032150 |
| 27               | 8                | 0              | -0.565660               | -2.243656 | -0.047933 |
| 28               | 1                | 0              | 4.780077                | 4.152929  | 0.953634  |
| 29               | 1                | 0              | 4.723054                | 4.278521  | -0.802453 |
| 30               | 1                | 0              | 5.695545                | 3.012232  | -0.039772 |
| 31               | 8                | 0              | -0.077247               | 2.898457  | -0.044715 |
| 32               | 1                | 0              | 0.001199                | 3.859811  | -0.056460 |
| 33               | 7                | 0              | -2.164481               | -0.483086 | -0.031687 |
| 34               | 1                | 0              | -1.559711               | -1.590365 | -0.046697 |
| 35               | 1                | 0              | 2.127703                | 4.251870  | -0.018396 |
| 36               | 6                | 0              | -3.589190               | -0.162947 | -0.004193 |
| 37               | 6                | 0              | -4.307463               | -1.521828 | -0.038934 |
| 38               | 1                | 0              | -4.054958               | -2.082109 | 0.870040  |
| 39               | 1                | 0              | -3.938948               | -2.086014 | -0.899119 |
| 40               | 6                | 0              | -3.944543               | 0.676228  | -1.246188 |
| 41               | 1                | 0              | -3.314860               | 1.567891  | -1.275403 |
| 42               | 1                | 0              | -3.738313               | 0.084608  | -2.146205 |
| 43               | 6                | 0              | -3.908311               | 0.595298  | 1.299072  |
| 44               | 1                | 0              | -3.507647               | 0.025594  | 2.140317  |
| 45               | 1                | 0              | -3.414551               | 1.574454  | 1.283210  |
| 46               | 8                | 0              | -5.712924               | -1.411031 | -0.195834 |
| 47               | 1                | 0              | -6.040402               | -0.975032 | 0.602226  |
| 48               | 8                | 0              | -5.301083               | 0.740693  | 1.528202  |
| 49               | 1                | 0              | -5.637695               | 1.288838  | 0.806556  |
| 50               | 8                | 0              | -5.287238               | 1.137296  | -1.232627 |
| 51               | 1                | 0              | -5.843274               | 0.347828  | -1.283649 |

**Structure TS<sub>23/24</sub> (DMSO)**

Energy (Hartrees): = -1245.0319493  
 Imaginary frequency -1011.75

Standard orientation:

| Center<br>Number | Atomic<br>Number | Atomic<br>Type | Coordinates (Angstroms) |           |           |
|------------------|------------------|----------------|-------------------------|-----------|-----------|
|                  |                  |                | X                       | Y         | Z         |
| 1                | 6                | 0              | 1.716417                | -1.858446 | -0.073797 |
| 2                | 6                | 0              | 2.814030                | -1.049782 | 0.012598  |
| 3                | 6                | 0              | 2.612741                | 0.388192  | 0.016156  |
| 4                | 6                | 0              | 1.293745                | 0.933882  | -0.042889 |
| 5                | 6                | 0              | 0.152313                | 0.043121  | -0.086778 |
| 6                | 6                | 0              | 0.381959                | -1.337534 | -0.130769 |
| 7                | 6                | 0              | 4.193283                | -1.687433 | 0.089093  |
| 8                | 6                | 0              | 1.183557                | 2.352246  | -0.094637 |
| 9                | 6                | 0              | 2.286165                | 3.173557  | -0.042441 |
| 10               | 6                | 0              | 3.580421                | 2.637481  | 0.048853  |
| 11               | 6                | 0              | 3.723816                | 1.269778  | 0.070097  |
| 12               | 6                | 0              | 4.518192                | -2.494170 | -1.175181 |
| 13               | 6                | 0              | 4.357859                | -2.532762 | 1.359242  |
| 14               | 6                | 0              | 4.767108                | 3.559628  | 0.119121  |
| 15               | 6                | 0              | -1.239206               | 0.440875  | -0.026174 |
| 16               | 1                | 0              | -1.500133               | 1.481956  | 0.114142  |
| 17               | 1                | 0              | 4.727935                | 0.876437  | 0.125213  |
| 18               | 1                | 0              | 4.940688                | -0.901141 | 0.149922  |

|    |   |   |           |           |           |
|----|---|---|-----------|-----------|-----------|
| 19 | 1 | 0 | 5.543373  | -2.870387 | -1.119172 |
| 20 | 1 | 0 | 4.437575  | -1.867908 | -2.067658 |
| 21 | 1 | 0 | 3.845659  | -3.345140 | -1.287989 |
| 22 | 1 | 0 | 5.383511  | -2.906175 | 1.423528  |
| 23 | 1 | 0 | 4.160529  | -1.933784 | 2.252180  |
| 24 | 1 | 0 | 3.681494  | -3.388072 | 1.361096  |
| 25 | 8 | 0 | 1.811019  | -3.210507 | -0.098814 |
| 26 | 1 | 0 | 0.900326  | -3.541193 | -0.150022 |
| 27 | 8 | 0 | -0.572989 | -2.230224 | -0.198181 |
| 28 | 1 | 0 | -1.554914 | -1.576962 | -0.186528 |
| 29 | 1 | 0 | 4.732129  | 4.169280  | 1.026400  |
| 30 | 1 | 0 | 4.780437  | 4.245592  | -0.731927 |
| 31 | 1 | 0 | 5.701523  | 2.996869  | 0.122163  |
| 32 | 8 | 0 | -0.061538 | 2.895813  | -0.210956 |
| 33 | 1 | 0 | 0.019065  | 3.857148  | -0.252225 |
| 34 | 7 | 0 | -2.163657 | -0.461172 | -0.111729 |
| 35 | 1 | 0 | 2.144612  | 4.250953  | -0.082958 |
| 36 | 6 | 0 | -3.586594 | -0.149565 | -0.006214 |
| 37 | 6 | 0 | -3.865886 | 0.427847  | 1.394711  |
| 38 | 1 | 0 | -3.369867 | 1.400740  | 1.496115  |
| 39 | 1 | 0 | -3.446457 | -0.250999 | 2.140622  |
| 40 | 6 | 0 | -3.977819 | 0.843540  | -1.116102 |
| 41 | 1 | 0 | -3.782857 | 0.381131  | -2.091329 |
| 42 | 1 | 0 | -3.366521 | 1.744718  | -1.036888 |
| 43 | 6 | 0 | -4.304619 | -1.496003 | -0.199222 |
| 44 | 1 | 0 | -4.018114 | -2.171159 | 0.617016  |
| 45 | 1 | 0 | -3.967091 | -1.935904 | -1.140773 |
| 46 | 8 | 0 | -5.254506 | 0.542847  | 1.676419  |
| 47 | 1 | 0 | -5.603633 | 1.168037  | 1.027233  |
| 48 | 8 | 0 | -5.331212 | 1.268540  | -1.014682 |
| 49 | 1 | 0 | -5.866295 | 0.471806  | -1.131092 |
| 50 | 8 | 0 | -5.717706 | -1.376415 | -0.286178 |
| 51 | 1 | 0 | -6.006804 | -1.034780 | 0.570170  |

-----

**Structure TS<sub>14bb/26bb</sub> (vacuum)**

Energy (Hartrees): =-2381.6073421

Imaginary frequency -1107.65

Standard orientation:

| Center<br>Number | Atomic<br>Number | Atomic<br>Type | Coordinates (Angstroms) |           |           |
|------------------|------------------|----------------|-------------------------|-----------|-----------|
|                  |                  |                | X                       | Y         | Z         |
| 1                | 6                | 0              | -5.040477               | -2.838360 | -0.692492 |
| 2                | 6                | 0              | -4.010310               | -3.151770 | -1.539703 |
| 3                | 6                | 0              | -2.901168               | -2.233791 | -1.626681 |
| 4                | 6                | 0              | -2.928000               | -0.998457 | -0.911159 |
| 5                | 6                | 0              | -4.077716               | -0.660119 | -0.109546 |
| 6                | 6                | 0              | -5.082444               | -1.604792 | 0.016322  |
| 7                | 6                | 0              | 3.960733                | 5.492626  | -1.828028 |
| 8                | 6                | 0              | -0.724486               | 1.943963  | -3.337321 |
| 9                | 6                | 0              | -4.063282               | -4.461515 | -2.310356 |
| 10               | 6                | 0              | -1.761336               | -0.183375 | -0.976170 |
| 11               | 6                | 0              | -0.660466               | -0.519890 | -1.744307 |
| 12               | 6                | 0              | -0.659942               | -1.729927 | -2.480334 |
| 13               | 6                | 0              | -1.755166               | -2.551491 | -2.402889 |
| 14               | 6                | 0              | -5.299925               | -4.551538 | -3.216876 |
| 15               | 6                | 0              | -3.960894               | -5.667746 | -1.366105 |
| 16               | 6                | 0              | 0.536535                | -2.089317 | -3.322123 |
| 17               | 6                | 0              | -4.306884               | 0.648498  | 0.507927  |
| 18               | 6                | 0              | 4.193118                | -0.631874 | 0.538497  |
| 19               | 6                | 0              | 0.516655                | 0.397383  | -1.771668 |
| 20               | 6                | 0              | 0.500134                | 1.585198  | -2.536154 |
| 21               | 6                | 0              | 1.615908                | 2.387833  | -2.531655 |
| 22               | 6                | 0              | 2.782816                | 2.077147  | -1.792281 |
| 23               | 6                | 0              | 2.808554                | 0.882727  | -1.014362 |
| 24               | 6                | 0              | 1.643792                | 0.072627  | -1.031395 |
| 25               | 6                | 0              | 3.984303                | 4.215783  | -2.679560 |
| 26               | 6                | 0              | 5.185818                | 4.192745  | -3.636133 |
| 27               | 6                | 0              | 3.926445                | 2.970493  | -1.808631 |
| 28               | 6                | 0              | 4.980229                | 2.687688  | -0.989386 |
| 29               | 6                | 0              | 5.032048                | 1.498452  | -0.184402 |
| 30               | 6                | 0              | 3.976476                | 0.575423  | -0.216545 |
| 31               | 1                | 0              | 3.505388                | -1.465822 | 0.514124  |
| 32               | 1                | 0              | 1.574769                | 3.296427  | -3.113191 |
| 33               | 1                | 0              | -3.695520               | 1.498563  | 0.232689  |
| 34               | 1                | 0              | -1.719540               | -3.479215 | -2.953323 |
| 35               | 1                | 0              | 6.662860                | 3.047845  | -0.271881 |
| 36               | 1                | 0              | 3.950210                | 6.374299  | -2.473924 |
| 37               | 1                | 0              | -3.204205               | -4.505837 | -2.975804 |
| 38               | 8                | 0              | 1.642463                | -1.070543 | -0.287056 |
| 39               | 1                | 0              | -5.243678               | -5.459462 | -3.822767 |
| 40               | 1                | 0              | -5.345143               | -3.694300 | -3.892173 |
| 41               | 1                | 0              | -6.219157               | -4.582808 | -2.634208 |

|     |   |   |           |           |           |
|-----|---|---|-----------|-----------|-----------|
| 42  | 1 | 0 | -3.943456 | -6.594749 | -1.944883 |
| 43  | 1 | 0 | -3.045683 | -5.617473 | -0.771706 |
| 44  | 1 | 0 | -4.813771 | -5.700864 | -0.687950 |
| 45  | 1 | 0 | -1.003948 | 1.127105  | -4.007601 |
| 46  | 1 | 0 | -0.546551 | 2.839683  | -3.932366 |
| 47  | 1 | 0 | -1.582868 | 2.128591  | -2.684686 |
| 48  | 8 | 0 | -6.088967 | -3.677857 | -0.504961 |
| 49  | 1 | 0 | -6.695241 | -3.239332 | 0.107146  |
| 50  | 8 | 0 | -6.183178 | -1.441828 | 0.762096  |
| 51  | 1 | 0 | -6.088035 | -0.561300 | 1.245097  |
| 52  | 1 | 0 | 0.357450  | -3.012990 | -3.872293 |
| 53  | 1 | 0 | 1.428840  | -2.222201 | -2.703483 |
| 54  | 1 | 0 | 0.760476  | -1.292746 | -4.036409 |
| 55  | 8 | 0 | -1.732706 | 0.962705  | -0.240246 |
| 56  | 8 | 0 | 6.114729  | 1.340867  | 0.522937  |
| 57  | 1 | 0 | 3.069970  | 5.519245  | -1.196047 |
| 58  | 1 | 0 | 4.841764  | 5.543969  | -1.187755 |
| 59  | 8 | 0 | 6.065251  | 3.491210  | -0.894361 |
| 60  | 1 | 0 | 3.100977  | 4.237728  | -3.313940 |
| 61  | 1 | 0 | 5.131425  | 5.049799  | -4.312355 |
| 62  | 1 | 0 | 5.180690  | 3.282463  | -4.239795 |
| 63  | 1 | 0 | 6.127523  | 4.242544  | -3.091856 |
| 64  | 1 | 0 | 5.942266  | 0.274425  | 1.096405  |
| 65  | 1 | 0 | -0.855206 | 1.358544  | -0.332508 |
| 66  | 1 | 0 | 0.763865  | -1.469227 | -0.346725 |
| 67  | 7 | 0 | -5.254792 | 0.815332  | 1.353552  |
| 68  | 6 | 0 | -6.793948 | 2.522356  | 1.794706  |
| 69  | 6 | 0 | -4.839774 | 2.170086  | 3.234522  |
| 70  | 6 | 0 | -6.955752 | 3.944877  | 2.325129  |
| 71  | 1 | 0 | -7.369305 | 1.833616  | 2.439340  |
| 72  | 6 | 0 | -4.974068 | 3.587932  | 3.786629  |
| 73  | 1 | 0 | -5.444434 | 1.486280  | 3.855726  |
| 74  | 6 | 0 | -6.416963 | 4.075551  | 3.744438  |
| 75  | 1 | 0 | -8.013934 | 4.216603  | 2.282193  |
| 76  | 1 | 0 | -6.413107 | 4.622639  | 1.656522  |
| 77  | 1 | 0 | -4.588320 | 3.601642  | 4.809339  |
| 78  | 1 | 0 | -4.339211 | 4.248127  | 3.185161  |
| 79  | 1 | 0 | -6.486054 | 5.109225  | 4.091636  |
| 80  | 1 | 0 | -7.026462 | 3.466028  | 4.421486  |
| 81  | 7 | 0 | -5.364095 | 2.149143  | 1.846859  |
| 82  | 7 | 0 | 5.257820  | -0.741681 | 1.267124  |
| 83  | 7 | 0 | 5.447345  | -1.947879 | 1.978167  |
| 84  | 6 | 0 | 6.816046  | -2.435840 | 1.692240  |
| 85  | 6 | 0 | 5.237902  | -1.687490 | 3.423813  |
| 86  | 6 | 0 | 7.030378  | -3.754564 | 2.429732  |
| 87  | 1 | 0 | 7.546229  | -1.697020 | 2.067875  |
| 88  | 6 | 0 | 5.433471  | -2.997282 | 4.185089  |
| 89  | 1 | 0 | 5.989890  | -0.957002 | 3.770066  |
| 90  | 6 | 0 | 6.810940  | -3.598051 | 3.930030  |
| 91  | 1 | 0 | 8.041406  | -4.112540 | 2.218388  |
| 92  | 1 | 0 | 6.327461  | -4.490612 | 2.023842  |
| 93  | 1 | 0 | 5.282262  | -2.806751 | 5.250763  |
| 94  | 1 | 0 | 4.655229  | -3.697494 | 3.861251  |
| 95  | 1 | 0 | 6.912135  | -4.560269 | 4.437367  |
| 96  | 1 | 0 | 7.578871  | -2.933635 | 4.342550  |
| 97  | 6 | 0 | -7.309413 | 2.416153  | 0.364754  |
| 98  | 1 | 0 | -6.682102 | 3.018233  | -0.298163 |
| 99  | 1 | 0 | -7.301511 | 1.386242  | 0.006982  |
| 100 | 1 | 0 | -8.334012 | 2.789551  | 0.310351  |
| 101 | 6 | 0 | -3.382556 | 1.723880  | 3.274438  |
| 102 | 1 | 0 | -3.262876 | 0.672651  | 3.014317  |
| 103 | 1 | 0 | -2.789336 | 2.320752  | 2.576109  |
| 104 | 1 | 0 | -2.984821 | 1.871086  | 4.280670  |
| 105 | 6 | 0 | 3.843267  | -1.126926 | 3.672292  |
| 106 | 1 | 0 | 3.716936  | -0.130138 | 3.249756  |
| 107 | 1 | 0 | 3.092555  | -1.788927 | 3.231546  |
| 108 | 1 | 0 | 3.661174  | -1.064083 | 4.746837  |
| 109 | 6 | 0 | 7.008454  | -2.611288 | 0.191421  |
| 110 | 1 | 0 | 6.222324  | -3.256910 | -0.208994 |
| 111 | 1 | 0 | 6.977445  | -1.657685 | -0.336252 |
| 112 | 1 | 0 | 7.976094  | -3.077461 | -0.003994 |

### Structure TS<sub>26bb/17bb</sub> (vacuum)

Energy (Hartrees): = -1245.0052286  
Imaginary frequency -1074.53

Standard orientation:

| Center Number | Atomic Number | Atomic Type | Coordinates (Angstroms) |          |           |
|---------------|---------------|-------------|-------------------------|----------|-----------|
|               |               |             | X                       | Y        | Z         |
| 1             | 6             | 0           | 4.793115                | 2.989165 | -0.659799 |
| 2             | 6             | 0           | 3.739467                | 3.249722 | -1.487820 |
| 3             | 6             | 0           | 2.670064                | 2.271775 | -1.570796 |



|    |   |   |           |           |           |
|----|---|---|-----------|-----------|-----------|
| 4  | 6 | 0 | 2.770729  | 1.033914  | -0.873595 |
| 5  | 6 | 0 | 3.950722  | 0.749080  | -0.089252 |
| 6  | 6 | 0 | 4.925899  | 1.746479  | 0.049967  |
| 7  | 6 | 0 | -3.440215 | -5.818777 | -1.357038 |
| 8  | 6 | 0 | 0.666318  | -2.073578 | -3.194126 |
| 9  | 6 | 0 | 3.713057  | 4.561470  | -2.255984 |
| 10 | 6 | 0 | 1.656640  | 0.158735  | -0.930413 |
| 11 | 6 | 0 | 0.519737  | 0.442871  | -1.672856 |
| 12 | 6 | 0 | 0.445000  | 1.656622  | -2.393439 |
| 13 | 6 | 0 | 1.500238  | 2.535826  | -2.323609 |
| 14 | 6 | 0 | 4.928709  | 4.709856  | -3.182632 |
| 15 | 6 | 0 | 3.572530  | 5.759459  | -1.306558 |
| 16 | 6 | 0 | -0.776610 | 1.960186  | -3.221594 |
| 17 | 6 | 0 | 4.290339  | -0.525870 | 0.485679  |
| 18 | 6 | 0 | -4.339169 | 0.435356  | 0.514390  |
| 19 | 6 | 0 | -0.613048 | -0.528843 | -1.659573 |
| 20 | 6 | 0 | -0.545285 | -1.747217 | -2.359125 |
| 21 | 6 | 0 | -1.608030 | -2.623956 | -2.264430 |
| 22 | 6 | 0 | -2.761450 | -2.344011 | -1.505841 |
| 23 | 6 | 0 | -2.850071 | -1.108433 | -0.811280 |
| 24 | 6 | 0 | -1.743660 | -0.236028 | -0.898844 |
| 25 | 6 | 0 | -3.829746 | -4.612706 | -2.222235 |
| 26 | 6 | 0 | -5.161501 | -4.850003 | -2.949023 |
| 27 | 6 | 0 | -3.830743 | -3.337291 | -1.395556 |
| 28 | 6 | 0 | -4.804007 | -3.134748 | -0.473991 |
| 29 | 6 | 0 | -4.948096 | -1.888531 | 0.282014  |
| 30 | 6 | 0 | -4.013198 | -0.833429 | 0.028261  |
| 31 | 1 | 0 | -3.783210 | 1.313471  | 0.220843  |
| 32 | 1 | 0 | -1.520508 | -3.568808 | -2.780935 |
| 33 | 1 | 0 | 3.717431  | -1.422788 | 0.289874  |
| 34 | 1 | 0 | 1.406946  | 3.465593  | -2.864345 |
| 35 | 1 | 0 | -6.335930 | -3.596521 | 0.452253  |
| 36 | 1 | 0 | -3.404411 | -6.727563 | -1.963525 |
| 37 | 1 | 0 | 2.840667  | 4.566979  | -2.905842 |
| 38 | 8 | 0 | -1.784372 | 0.934926  | -0.197027 |
| 39 | 1 | 0 | 4.826002  | 5.620257  | -3.778700 |
| 40 | 1 | 0 | 4.996890  | 3.860878  | -3.866388 |
| 41 | 1 | 0 | 5.855314  | 4.772516  | -2.614140 |
| 42 | 1 | 0 | 3.507784  | 6.687104  | -1.881122 |
| 43 | 1 | 0 | 2.668586  | 5.668230  | -0.699831 |
| 44 | 1 | 0 | 4.432440  | 5.825765  | -0.639839 |
| 45 | 1 | 0 | 0.852400  | -1.286420 | -3.929313 |
| 46 | 1 | 0 | 0.527214  | -3.017250 | -3.721593 |
| 47 | 1 | 0 | 1.565965  | -2.153025 | -2.577353 |
| 48 | 8 | 0 | 5.807082  | 3.866633  | -0.472891 |
| 49 | 1 | 0 | 6.428962  | 3.422044  | 0.124300  |
| 50 | 8 | 0 | 6.008706  | 1.608225  | 0.761903  |
| 51 | 1 | 0 | 5.923988  | 0.470245  | 1.208114  |
| 52 | 1 | 0 | -0.655714 | 2.902515  | -3.755885 |
| 53 | 1 | 0 | -1.672047 | 2.028751  | -2.597574 |
| 54 | 1 | 0 | -0.956382 | 1.165247  | -3.950051 |
| 55 | 8 | 0 | 1.717174  | -0.998356 | -0.210790 |
| 56 | 8 | 0 | -5.938668 | -1.811444 | 1.046659  |
| 57 | 1 | 0 | -2.459338 | -5.670325 | -0.898896 |
| 58 | 1 | 0 | -4.174402 | -5.962789 | -0.562258 |
| 59 | 8 | 0 | -5.767440 | -4.039884 | -0.202784 |
| 60 | 1 | 0 | -3.083227 | -4.508685 | -3.008402 |
| 61 | 1 | 0 | -5.055525 | -5.697301 | -3.631361 |
| 62 | 1 | 0 | -5.441791 | -3.973398 | -3.537345 |
| 63 | 1 | 0 | -5.965993 | -5.067695 | -2.249132 |
| 64 | 1 | 0 | 0.861325  | -1.442852 | -0.280821 |
| 65 | 1 | 0 | -0.922084 | 1.364797  | -0.275615 |
| 66 | 7 | 0 | 5.346483  | -0.624388 | 1.228046  |
| 67 | 6 | 0 | 7.143354  | -2.115418 | 1.355421  |
| 68 | 6 | 0 | 5.454190  | -2.012571 | 3.137401  |
| 69 | 6 | 0 | 7.547248  | -3.522136 | 1.785866  |
| 70 | 1 | 0 | 7.747313  | -1.384036 | 1.922151  |
| 71 | 6 | 0 | 5.835267  | -3.419630 | 3.594875  |
| 72 | 1 | 0 | 6.086216  | -1.279140 | 3.668131  |
| 73 | 6 | 0 | 7.288758  | -3.746655 | 3.271494  |
| 74 | 1 | 0 | 8.603401  | -3.671987 | 1.547319  |
| 75 | 1 | 0 | 6.968993  | -4.238948 | 1.192279  |
| 76 | 1 | 0 | 5.648129  | -3.500105 | 4.668834  |
| 77 | 1 | 0 | 5.171664  | -4.130538 | 3.089968  |
| 78 | 1 | 0 | 7.523466  | -4.775908 | 3.552991  |
| 79 | 1 | 0 | 7.946682  | -3.094681 | 3.857586  |
| 80 | 7 | 0 | 5.713009  | -1.912247 | 1.680684  |
| 81 | 7 | 0 | -5.342453 | 0.690575  | 1.335187  |
| 82 | 7 | 0 | -5.651878 | 2.014277  | 1.674630  |
| 83 | 6 | 0 | -7.067646 | 2.278023  | 1.327695  |
| 84 | 6 | 0 | -5.348273 | 2.248070  | 3.106773  |
| 85 | 6 | 0 | -7.394269 | 3.733244  | 1.651574  |
| 86 | 1 | 0 | -7.714627 | 1.629129  | 1.946086  |
| 87 | 6 | 0 | -5.664677 | 3.704127  | 3.441394  |
| 88 | 1 | 0 | -5.990962 | 1.595172  | 3.724078  |
| 89 | 6 | 0 | -7.110287 | 4.057105  | 3.113590  |
| 90 | 1 | 0 | -8.443457 | 3.917504  | 1.406865  |
| 91 | 1 | 0 | -6.785857 | 4.372552  | 1.002104  |

|     |   |   |           |           |           |
|-----|---|---|-----------|-----------|-----------|
| 92  | 1 | 0 | -5.451045 | 3.872626  | 4.499902  |
| 93  | 1 | 0 | -4.986275 | 4.340656  | 2.862224  |
| 94  | 1 | 0 | -7.305874 | 5.111723  | 3.320093  |
| 95  | 1 | 0 | -7.782009 | 3.472908  | 3.753057  |
| 96  | 6 | 0 | 7.381300  | -1.910082 | -0.135534 |
| 97  | 1 | 0 | 6.705156  | -2.548572 | -0.710396 |
| 98  | 1 | 0 | 7.219516  | -0.873884 | -0.434248 |
| 99  | 1 | 0 | 8.409810  | -2.178419 | -0.384659 |
| 100 | 6 | 0 | 3.989495  | -1.726621 | 3.443676  |
| 101 | 1 | 0 | 3.720404  | -0.690133 | 3.240291  |
| 102 | 1 | 0 | 3.348476  | -2.375119 | 2.839979  |
| 103 | 1 | 0 | 3.790613  | -1.927749 | 4.498108  |
| 104 | 6 | 0 | -3.885489 | 1.934656  | 3.393585  |
| 105 | 1 | 0 | -3.652818 | 0.879290  | 3.252317  |
| 106 | 1 | 0 | -3.243930 | 2.521092  | 2.730308  |
| 107 | 1 | 0 | -3.650177 | 2.198667  | 4.426417  |
| 108 | 6 | 0 | -7.313694 | 1.973251  | -0.144391 |
| 109 | 1 | 0 | -6.608003 | 2.536522  | -0.760660 |
| 110 | 1 | 0 | -7.199792 | 0.911859  | -0.367136 |
| 111 | 1 | 0 | -8.328023 | 2.270630  | -0.416658 |
| 112 | 1 | 0 | -5.923581 | -0.093147 | 1.651230  |

---
